# Supplementary material for: Changes in pathogenicity and immunogenicity of Mycoplasma mycoides subsp. mycoides strains revealed by comparative genomics analysis
Source: PubMed Central journal article supplement (PMC4707488; doi:10.1038/srep19081), 2016-01-11
Supplement: srep19081-s1.pdf [file srep19081-s1.pdf]

# **Changes in pathogenicity and immunogenicity of *Mycoplasma mycoides* subsp. *mycoides* strains revealed by comparative genomics analysis**

Yuan Li<sup>#1</sup>, Yang Wang<sup>#1,2</sup>, Rui Wang<sup>3</sup>, Yongqiang Zhu<sup>3</sup>, Suli Liu<sup>1</sup>, Qi Wang<sup>4</sup>, Jiari Shao<sup>5</sup>, Ying Chen<sup>6</sup>, Liping Gao<sup>1</sup>, Changping Zhou<sup>1</sup>, Henggui Liu<sup>1</sup>, Xiumei Wang<sup>1</sup>,  
Huajun Zheng<sup>3,7\*</sup> and Jiuqing Xin<sup>1\*</sup>

1 National Contagious Bovine Pleuropneumonia Reference Laboratory, Division of Bacterial Diseases, State Key Laboratory of Veterinary Biotechnology, Harbin Veterinary Research Institute, CAAS, Harbin, China.

2 Key Laboratory of Fermentation Engineering (Ministry of Education), Hubei Provincial Cooperative Innovation Center of Industrial Fermentation, College of Bioengineering, Hubei University of Technology, Wuhan, China

3. Shanghai-MOST Key Laboratory of Health and Disease Genomics, Chinese National Human Genome Center at Shanghai, Shanghai, China.

4 College of Resources and Environmental, Northeast Agricultural University, Harbin, China.

5 College of Animal Science and Technology, Jilin Agricultural University, Changchun, China.

6. College of Veterinary Medicine, Northeast Agricultural University, Harbin, China

7 Laboratory of Medical Foods, Shanghai Institute of Planned Parenthood Research, Shanghai, China.

Competing Interests: The authors have declared that no competing interests exist.

\* Co-corresponding authors E-mail: xinjiuqing2001@126.com; zhenghj@chgc.sh.cn

# These authors contributed equally to this work.

### Supplementary Figure 1

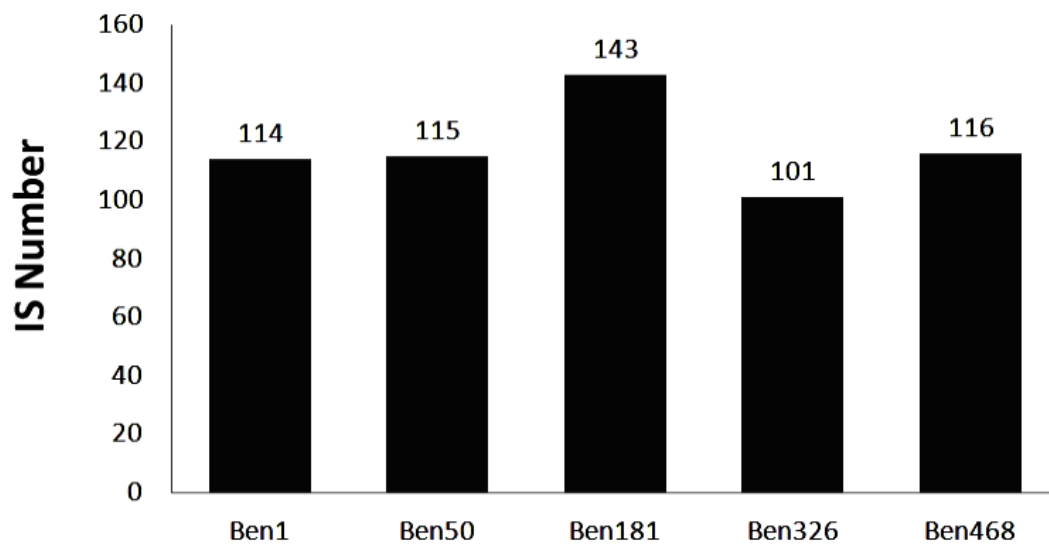

**Supplementary Figure 1. Distribution of IS elements in the five MmmSc genomes.**

The complete distribution of IS elements was listed for each genome.

**Supplementary Figure 2**

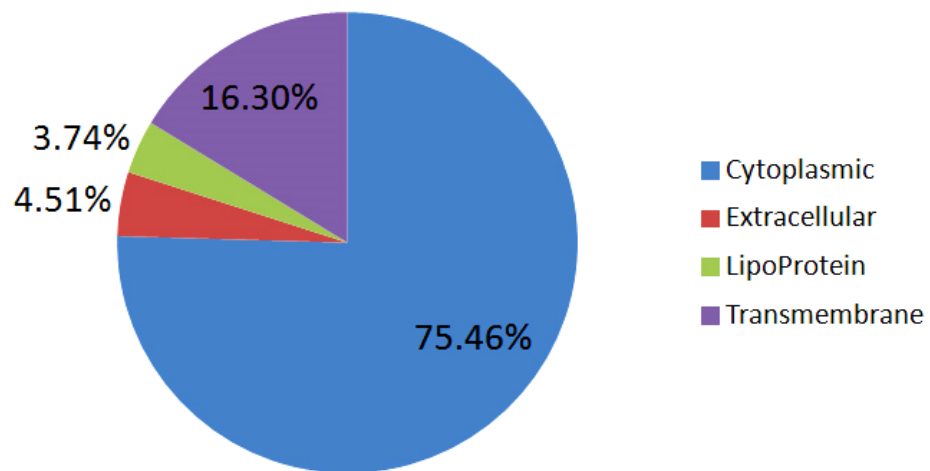

**Supplementary Figure 2. Subcellular distribution of BEN-1 proteins.**

### Supplementary Figure 3

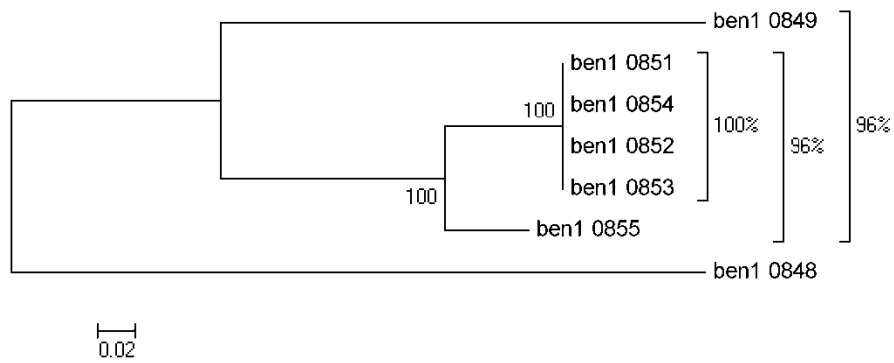

**Supplementary Figure 3. Phylogenetic tree of VSP genes.** The phylogenetic tree was built based on nucleotide sequence using the neighbor-joining method implemented in MEGA5. The percentage indicates the identity between different VSP genes.

## Supplementary Figure 4

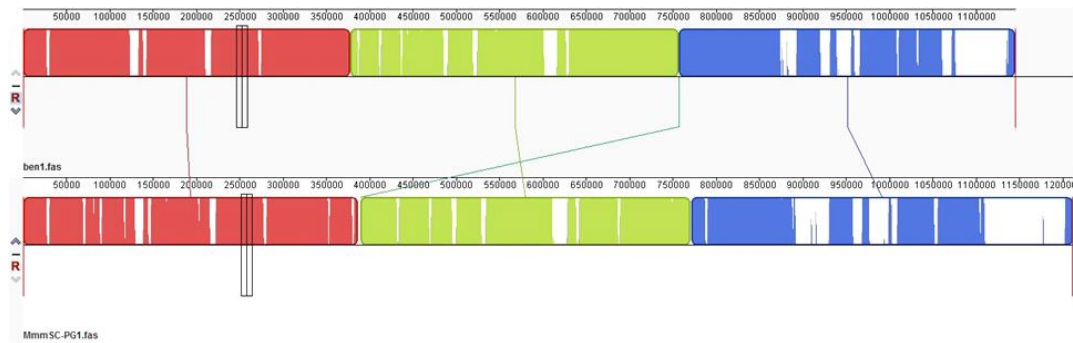

### Supplementary Figure 4. Genome comparison between MmmSC PG1 and BEN-1.

Blocks with the same color represent homologous regions between the two genomes, and the blank regions represent unique regions of the genome.

**Supplementary Figure 5**

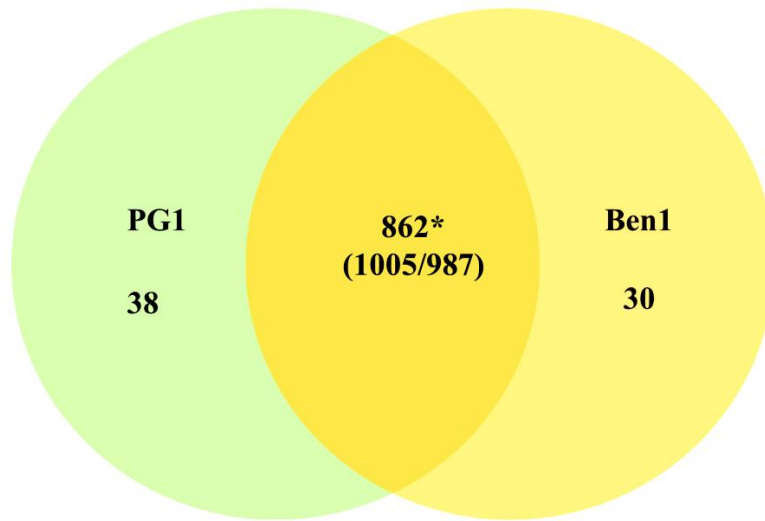

**Supplementary Figure 5. Homologous and unique genes between Mmm PG1 and BEN-1.** Orthologs excluding gene duplication. The number in parentheses separately indicates the gene number corresponding to orthologs found in both PG1 and BEN-1.

## Supplementary Figure 6

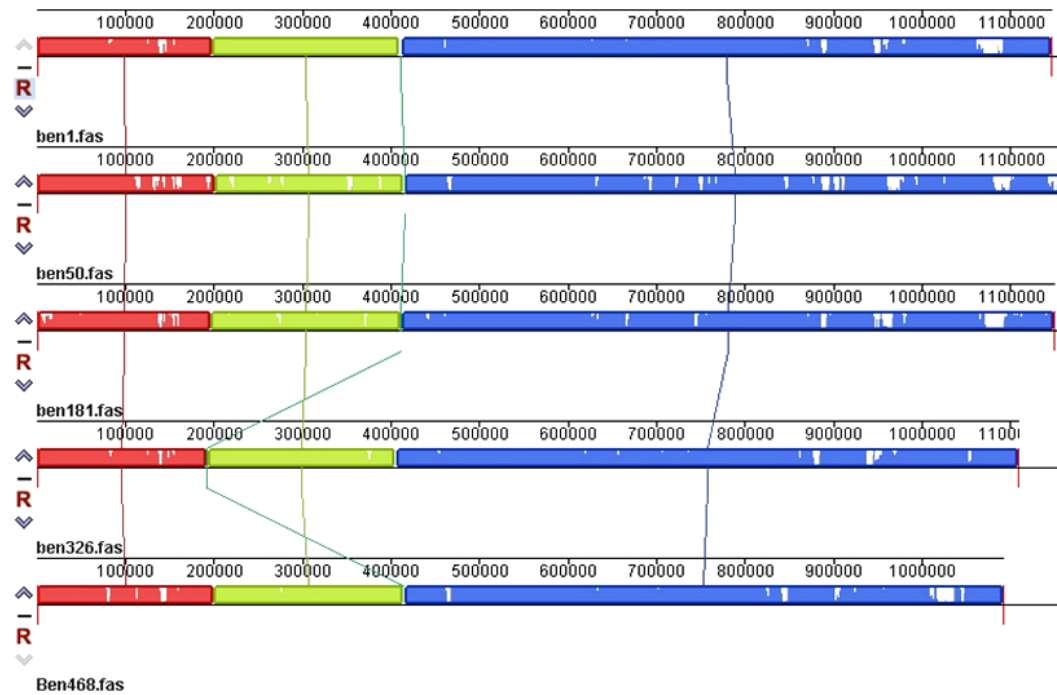

**Supplementary Figure 6. Genome comparison among the five Mmm BEN genomes.** Blocks of the same color represent homologous regions among the five genomes, and blank regions represent unique regions of each genome.

**Supplementary Table 1. IS elements in Ben1 genome**

| IS     | Start  | End    | Length | Strand | IS element | Family |
|--------|--------|--------|--------|--------|------------|--------|
| IS0001 | 23001  | 22141  | 861    | -      | IS1296SQ   | IS3    |
| IS0002 | 23189  | 23010  | 180    | -      | IS1296MP   | IS3    |
| IS0003 | 47769  | 49289  | 1521   | +      | IS1634AC   | IS1634 |
| IS0004 | 67770  | 66910  | 861    | -      | IS1296IE   | IS3    |
| IS0005 | 67958  | 67779  | 180    | -      | IS1296MP   | IS3    |
| IS0006 | 68345  | 68163  | 183    | -      | IS1296IE   | IS3    |
| IS0007 | 79705  | 78182  | 1524   | -      | IS4        | IS4    |
| IS0008 | 110854 | 112257 | 1404   | +      | IS1634AW   | IS1634 |
| IS0009 | 139097 | 137574 | 1524   | -      | IS4        | IS4    |
| IS0010 | 139551 | 139730 | 180    | +      | IS1296UK   | IS3    |
| IS0011 | 139739 | 140509 | 771    | +      | IS1296MP   | IS3    |
| IS0012 | 141942 | 140530 | 1413   | -      | ISMmy1F    | IS1634 |
| IS0013 | 145176 | 146036 | 861    | +      | IS1296MP   | IS3    |
| IS0014 | 156276 | 155923 | 354    | -      | IS1296     | IS3    |
| IS0015 | 156782 | 156291 | 492    | -      | IS1296MP   | IS3    |
| IS0016 | 157333 | 156791 | 543    | -      | IS1296QT   | IS3    |
| IS0017 | 160240 | 158567 | 1674   | -      | IS1634AW   | IS1634 |
| IS0018 | 160694 | 160873 | 180    | +      | IS1296UK   | IS3    |
| IS0019 | 160882 | 161685 | 804    | +      | IS1296MP   | IS3    |
| IS0020 | 191630 | 193150 | 1521   | +      | IS1634AC   | IS1634 |
| IS0021 | 195915 | 197435 | 1521   | +      | IS1634AC   | IS1634 |
| IS0022 | 197640 | 198533 | 894    | +      | IS1296MP   | IS3    |
| IS0023 | 238889 | 238536 | 354    | -      | IS1296JI   | IS3    |
| IS0024 | 239583 | 239404 | 180    | -      | IS1296MP   | IS3    |
| IS0025 | 240384 | 240674 | 291    | +      | IS3        | IS3    |
| IS0026 | 258181 | 259593 | 1413   | +      | ISMmy1F    | IS1634 |
| IS0027 | 260383 | 259892 | 492    | -      | IS1296MP   | IS3    |
| IS0028 | 260571 | 260392 | 180    | -      | IS1296MP   | IS3    |
| IS0029 | 266516 | 266803 | 288    | +      | IS1296AB_B | IS3    |
| IS0030 | 266878 | 267057 | 180    | +      | IS1296UK   | IS3    |
| IS0031 | 267066 | 267926 | 861    | +      | IS1296MP   | IS3    |
| IS0032 | 272831 | 274351 | 1521   | +      | IS1634AC   | IS1634 |
| IS0033 | 274556 | 275449 | 894    | +      | IS1296MP   | IS3    |
| IS0034 | 278166 | 279686 | 1521   | +      | IS1634AC   | IS1634 |
| IS0035 | 356367 | 358040 | 1674   | +      | IS1634AW   | IS1634 |
| IS0036 | 378043 | 378585 | 543    | +      | IS1296QT   | IS3    |
| IS0037 | 378594 | 379454 | 861    | +      | IS1296MP   | IS3    |
| IS0038 | 380085 | 381605 | 1521   | +      | IS1634AC   | IS1634 |
| IS0039 | 386373 | 386660 | 288    | +      | IS1296AB_B | IS3    |
| IS0040 | 386735 | 386914 | 180    | +      | IS1296UK   | IS3    |
| IS0041 | 386923 | 387798 | 876    | +      | IS150      | IS3    |
| IS0042 | 406860 | 405337 | 1524   | -      | IS4        | IS4    |



|        |        |        |      |   |            |        |
|--------|--------|--------|------|---|------------|--------|
| IS0043 | 409207 | 408854 | 354  | - | IS1296     | IS3    |
| IS0044 | 409713 | 409222 | 492  | - | IS1296MP   | IS3    |
| IS0045 | 409901 | 409722 | 180  | - | IS1296UK   | IS3    |
| IS0046 | 412824 | 411151 | 1674 | - | IS1634AW   | IS1634 |
| IS0047 | 425125 | 423452 | 1674 | - | IS1634AW   | IS1634 |
| IS0048 | 436450 | 436082 | 369  | - | IS150      | IS3    |
| IS0049 | 436957 | 436544 | 414  | - | IS1296MP   | IS3    |
| IS0050 | 450157 | 451680 | 1524 | + | IS4        | IS4    |
| IS0051 | 460230 | 458557 | 1674 | - | IS1634AW   | IS1634 |
| IS0052 | 460684 | 460863 | 180  | + | IS1296UK   | IS3    |
| IS0053 | 460872 | 461732 | 861  | + | IS1296MP   | IS3    |
| IS0054 | 584865 | 583192 | 1674 | - | IS4        | IS4    |
| IS0055 | 589325 | 588972 | 354  | - | IS1296     | IS3    |
| IS0056 | 589831 | 589340 | 492  | - | IS1296MP   | IS3    |
| IS0057 | 590019 | 589840 | 180  | - | IS1296MP   | IS3    |
| IS0058 | 616096 | 614423 | 1674 | - | IS1634AW   | IS1634 |
| IS0059 | 627552 | 626902 | 651  | - | IS1296IE   | IS3    |
| IS0060 | 627740 | 627561 | 180  | - | IS1296MP   | IS3    |
| IS0061 | 628302 | 629822 | 1521 | + | IS1634AC   | IS1634 |
| IS0062 | 632421 | 631684 | 738  | - | ISMmy1F    | IS1634 |
| IS0063 | 633095 | 632475 | 621  | - | ISMmy1E    | IS1634 |
| IS0064 | 671498 | 672925 | 1428 | + | IS4        | IS4    |
| IS0065 | 708469 | 708116 | 354  | - | IS1296     | IS3    |
| IS0066 | 708975 | 708484 | 492  | - | IS1296MP   | IS3    |
| IS0067 | 709163 | 708984 | 180  | - | IS1296MP   | IS3    |
| IS0068 | 716342 | 714819 | 1524 | - | IS4        | IS4    |
| IS0069 | 742912 | 743454 | 543  | + | IS1296AB_B | IS3    |
| IS0070 | 743463 | 744311 | 849  | + | IS1296AB_B | IS3    |
| IS0071 | 746984 | 748504 | 1521 | + | IS1634AC   | IS1634 |
| IS0072 | 756783 | 755110 | 1674 | - | IS1634AW   | IS1634 |
| IS0073 | 783051 | 784574 | 1524 | + | IS4        | IS4    |
| IS0074 | 785652 | 786296 | 645  | + | IS1138     | IS3    |
| IS0075 | 811763 | 810090 | 1674 | - | IS1634AW   | IS1634 |
| IS0076 | 865805 | 864627 | 1179 | - | ISMmy1F    | IS1634 |
| IS0077 | 871225 | 871377 | 153  | + | IS4        | IS4    |
| IS0078 | 871428 | 872321 | 894  | + | IS1296MP   | IS3    |
| IS0079 | 880637 | 879225 | 1413 | - | ISMmy1F    | IS1634 |
| IS0080 | 883756 | 885429 | 1674 | + | IS1634AW   | IS1634 |
| IS0081 | 896895 | 898418 | 1524 | + | IS4        | IS4    |
| IS0082 | 913781 | 913317 | 465  | - | IS1296EH   | IS3    |
| IS0083 | 920603 | 920782 | 180  | + | IS1296UK   | IS3    |
| IS0084 | 920791 | 921651 | 861  | + | IS1296MP   | IS3    |
| IS0085 | 930210 | 930497 | 288  | + | IS1296AB_B | IS3    |
| IS0086 | 930572 | 930751 | 180  | + | IS1296UK   | IS3    |

|        |         |         |      |   |            |        |
|--------|---------|---------|------|---|------------|--------|
| IS0087 | 930760  | 931620  | 861  | + | IS1296MP   | IS3    |
| IS0088 | 939264  | 940787  | 1524 | + | IS1634     | IS1634 |
| IS0089 | 954217  | 952694  | 1524 | - | IS4        | IS4    |
| IS0090 | 957098  | 955425  | 1674 | - | IS1634AW   | IS1634 |
| IS0091 | 965526  | 963853  | 1674 | - | IS1634AW   | IS1634 |
| IS0092 | 977854  | 978141  | 288  | + | IS1296AB_B | IS3    |
| IS0093 | 978216  | 978395  | 180  | + | IS1296UK   | IS3    |
| IS0094 | 978404  | 979264  | 861  | + | IS1296MP   | IS3    |
| IS0095 | 984531  | 983671  | 861  | - | IS150      | IS3    |
| IS0096 | 984719  | 984540  | 180  | - | IS1296DS   | IS3    |
| IS0097 | 1000178 | 998655  | 1524 | - | IS4        | IS4    |
| IS0098 | 1004216 | 1002543 | 1674 | - | IS1634AW   | IS1634 |
| IS0099 | 1016017 | 1014344 | 1674 | - | IS1634AW   | IS1634 |
| IS0100 | 1032204 | 1031836 | 369  | - | IS150      | IS3    |
| IS0101 | 1032710 | 1032219 | 492  | - | IS1296MP   | IS3    |
| IS0102 | 1032898 | 1032719 | 180  | - | IS1296MP   | IS3    |
| IS0103 | 1063473 | 1061800 | 1674 | - | IS1634AW   | IS1634 |
| IS0104 | 1069261 | 1067588 | 1674 | - | IS1634AW   | IS1634 |
| IS0105 | 1073112 | 1071439 | 1674 | - | IS1634AW   | IS1634 |
| IS0106 | 1078934 | 1077411 | 1524 | - | IS4        | IS4    |
| IS0107 | 1087940 | 1086267 | 1674 | - | IS1634AW   | IS1634 |
| IS0108 | 1097807 | 1097992 | 186  | + | IS1296     | IS3    |
| IS0109 | 1112676 | 1114196 | 1521 | + | IS1634AC   | IS1634 |
| IS0110 | 1131115 | 1132527 | 1413 | + | ISMmy1F    | IS1634 |
| IS0111 | 1133190 | 1134710 | 1521 | + | IS1634AC   | IS1634 |
| IS0112 | 1136620 | 1136267 | 354  | - | IS1296     | IS3    |
| IS0113 | 1137126 | 1136635 | 492  | - | IS1296MP   | IS3    |
| IS0114 | 1137314 | 1137135 | 180  | - | IS1296MP   | IS3    |

**Supplementary Table 2. CRISPRs distribution in five Mmm genomes**

| <b>Genome</b> | <b>CRISPR ID</b> | <b>Start</b> | <b>End</b> | <b>Length (bp)</b> | <b>DR Length</b> | <b>DR consensus</b>      | <b>Spacer Number</b> |
|---------------|------------------|--------------|------------|--------------------|------------------|--------------------------|----------------------|
| Ben1          | 1                | 190634       | 190801     | 168                | 24               | TAAATAATTAAATATTTCTCTAGC | 2                    |
|               | 2                | 463537       | 463712     | 176                | 25               | GTTTAATCAAGATATTTCAAATGA | 2                    |
|               | 3                | 463837       | 464011     | 175                | 25               | GTTTAATCAAGATATTTCAAATGA | 2                    |
| Ben50         | 1                | 192736       | 192903     | 168                | 24               | TAAATAATTAAATATTTCTCTAGC | 2                    |
|               | 2                | 470466       | 470641     | 176                | 25               | GTTTAATCAAGATATTTCAAATGA | 2                    |
|               | 3                | 470766       | 470940     | 175                | 25               | GTTTAATCAAGATATTTCAAATGA | 2                    |
| Ben181        | 1                | 189222       | 189389     | 168                | 24               | TAAATAATTAAATATTTCTCTAGC | 2                    |
|               | 2                | 463933       | 464108     | 176                | 25               | GTTTAATCAAGATATTTCAAATGA | 2                    |
|               | 3                | 464233       | 464407     | 175                | 25               | GTTTAATCAAGATATTTCAAATGA | 2                    |
| Ben326        | 1                | 184729       | 184896     | 168                | 24               | TAAATAATTAAATATTTCTCTAGC | 2                    |
|               | 2                | 457173       | 457348     | 176                | 25               | GTTTAATCAAGATATTTCAAATGA | 2                    |
|               | 3                | 457473       | 457647     | 175                | 25               | GTTTAATCAAGATATTTCAAATGA | 2                    |
| Ben468        | 1                | 191436       | 191603     | 168                | 24               | TAAATAATTAAATATTTCTCTAGC | 2                    |
|               | 2                | 469158       | 469333     | 176                | 25               | GTTTAATCAAGATATTTCAAATGA | 2                    |
|               | 3                | 469458       | 469632     | 175                | 25               | GTTTAATCAAGATATTTCAAATGA | 2                    |

**Supplementary Table 3. Known virulence genes in Ben1**

| <b>Gene</b> | <b>Strand</b> | <b>Product</b>                               | <b>Gene Symbol</b> |
|-------------|---------------|----------------------------------------------|--------------------|
| ben1_0014   | +             | immunodominant protein P72                   | LppA               |
| ben1_0282   | -             | glycerol uptake facilitator                  |                    |
| ben1_0284   | -             | FAD dependent oxidoreductase                 | GlpO               |
| ben1_0422   | +             | variable surface protein                     | Vmm                |
| ben1_0558   | +             | glycerol ABC transporter ATP-binding protein |                    |
| ben1_0559   | +             | glycerol ABC transporter, permease           |                    |
| ben1_0561   | +             | glycerol ABC transporter permease            |                    |
| ben1_0562   | +             | lipoprotein B precursor                      | LppB               |
| ben1_0685   | -             | prolipoprotein                               | LppD               |
| ben1_0848   | -             | variable surface protein                     |                    |
| ben1_0849   | -             | variable surface protein                     |                    |
| ben1_0851   | -             | variable surface protein                     |                    |
| ben1_0852   | -             | variable surface protein                     |                    |
| ben1_0853   | -             | variable surface protein                     |                    |
| ben1_0854   | -             | variable surface protein                     |                    |
| ben1_0855   | -             | variable surface protein                     |                    |
| ben1_1059   | +             | variable surface prolipoprotein              | LppC               |
| ben1_1077   | +             | prolipoprotein Q                             | LppQ               |

**Supplementary Table 4. Putative Virulence Genes in Ben1 Genome**

| <b>Ben1 Gene</b> | <b>Pr Length</b> | <b>Hit Virulence Factor</b>                                                                     | <b>align lenth</b> | <b>evalue</b> |
|------------------|------------------|-------------------------------------------------------------------------------------------------|--------------------|---------------|
| ben1_0166        | 395              | 25269 vfid 60410 vsiid 81277 ssid ribosomal protection tetracycline resistance protein          | 150                | 1.0167E-19    |
| ben1_0356        | 600              | 24900 vfid 59710 vsiid 80577 ssid tetracycline resistance protein                               | 436                | 3.2101E-24    |
| ben1_0508        | 506              | 2507 vfid 2752 vsiid 3111 ssid RNA polymerase sigma factor                                      | 270                | 6.4349E-63    |
| ben1_0657        | 591              | 18779 vfid 42147 vsiid 62984 ssid molecular chaperone DnaK                                      | 570                | 0             |
| ben1_0660        | 713              | 15128 vfid 24326 vsiid 45146 ssid ClpB protein                                                  | 710                | 0             |
| ben1_0927        | 475              | 13339 vfid 20832 vsiid 40392 ssid type III secretion system ATPase                              | 414                | 1.4237E-42    |
| ben1_0991        | 946              | 15483 vfid 35556 vsiid 56393 ssid putative excinuclease ABC subunit A                           | 720                | 4.74E-139     |
| ben1_1064        | 1255             | 18840 vfid 42269 vsiid 63106 ssid DNA-directed RNA polymerase subunit beta`                     | 1254               | 0             |
| ben1_0001        | 450              | 7463 vfid 8812 vsiid 10730 ssid chromosomal replication initiation protein                      | 329                | 1.6885E-43    |
| ben1_0004        | 266              | 23529 vfid 57079 vsiid 77946 ssid S-adenosylmethionine-6-N,N'-adenosyl rRNA dimethyltransferase | 258                | 1.019E-38     |
| ben1_0010        | 538              | 18798 vfid 42185 vsiid 63022 ssid ribose ABC transporter ATP-binding protein                    | 504                | 6.1108E-80    |
| ben1_0015        | 286              | 19333 vfid 43255 vsiid 64092 ssid IS600 ORF2                                                    | 279                | 3.2328E-34    |
| ben1_0020        | 252              | 16580 vfid 37750 vsiid 58587 ssid 3-ketoacyl- acyl-carrier-protein reductase                    | 256                | 9.5736E-19    |
| ben1_0026        | 146              | 17567 vfid 39723 vsiid 60560 ssid hypothetical protein lin0097                                  | 119                | 2.8523E-18    |
| ben1_0028        | 69               | 17519 vfid 39627 vsiid 60464 ssid cold shock protein CspC                                       | 64                 | 4.4258E-15    |
| ben1_0030        | 344              | 23687 vfid 57375 vsiid 78242 ssid macrolide transporter ATP-binding /permease protein           | 217                | 8.2052E-48    |
| ben1_0034        | 328              | 25410 vfid 60681 vsiid 81548 ssid VanHB                                                         | 314                | 4.3868E-45    |
| ben1_0056        | 149              | 2936 vfid 3612 vsiid 4174 ssid peroxiredoxin                                                    | 143                | 1.0307E-11    |
| ben1_0058        | 286              | 19333 vfid 43255 vsiid 64092 ssid IS600 ORF2                                                    | 279                | 3.4303E-31    |
| ben1_0068        | 422              | 20578 vfid 45744 vsiid 66581 ssid seryl-tRNA synthetase                                         | 442                | 2.6357E-91    |
| ben1_0071        | 500              | 14026 vfid 22499 vsiid 42752 ssid putative lysyl-tRNA synthetase LysU                           | 487                | 8.553E-124    |
| ben1_0074        | 102              | 2934 vfid 3608 vsiid 4170 ssid thioredoxin                                                      | 106                | 1.7677E-16    |
| ben1_0079        | 250              | 18814 vfid 42217 vsiid 63054 ssid hypothetical protein gbs0131                                  | 225                | 3.9587E-28    |

|           |     |                                                                                     |     |            |
|-----------|-----|-------------------------------------------------------------------------------------|-----|------------|
| ben1_0081 | 454 | 20542 vfid 45672 vsiid 66509 ssid asparaginyl-tRNA synthetase                       | 456 | 2.162E-122 |
| ben1_0091 | 944 | 10980 vfid 74981 vsiid 101978 ssid RecName: Full=Protein translocase subunit SecA 1 | 772 | 0          |
| ben1_0100 | 166 | 2791 vfid 3322 vsiid 3884 ssid pore-forming hemolysin                               | 135 | 5.7153E-22 |
| ben1_0110 | 304 | 2725 vfid 3190 vsiid 3752 ssid glycosyltransferase 2                                | 262 | 4.6502E-14 |
| ben1_0111 | 290 | 7931 vfid 9789 vsiid 11985 ssid UDP-glucose pyrophosphorylase                       | 291 | 2.5489E-62 |
| ben1_0114 | 512 | 17445 vfid 39479 vsiid 60316 ssid ABC transporter, ATP-binding protein              | 513 | 1.34E-115  |
| ben1_0125 | 256 | 19333 vfid 43255 vsiid 64092 ssid IS600 ORF2                                        | 255 | 6.7199E-31 |
| ben1_0133 | 286 | 19333 vfid 43255 vsiid 64092 ssid IS600 ORF2                                        | 279 | 3.852E-34  |
| ben1_0136 | 483 | 18795 vfid 42179 vsiid 63016 ssid glutamyl-tRNA synthetase                          | 491 | 1.102E-107 |
| ben1_0139 | 532 | 18499 vfid 41587 vsiid 62424 ssid CTP synthetase                                    | 534 | 9.219E-168 |
| ben1_0142 | 117 | 20840 vfid 46268 vsiid 67105 ssid ISxac3 transposase                                | 106 | 2.7643E-15 |
| ben1_0145 | 297 | 18808 vfid 42205 vsiid 63042 ssid fructose-bisphosphate aldolase                    | 293 | 2.5838E-81 |
| ben1_0148 | 267 | 19333 vfid 43255 vsiid 64092 ssid IS600 ORF2                                        | 268 | 5.9727E-31 |
| ben1_0155 | 209 | 27010 vfid 63958 vsiid 84826 ssid thymidine kinase                                  | 191 | 1.1738E-23 |
| ben1_0165 | 689 | 25249 vfid 60371 vsiid 81238 ssid TetT                                              | 669 | 2.1658E-68 |
| ben1_0172 | 451 | 27175 vfid 64285 vsiid 85153 ssid cytosolic leucyl aminopeptidase                   | 297 | 2.0281E-54 |
| ben1_0184 | 297 | 19333 vfid 43255 vsiid 64092 ssid IS600 ORF2                                        | 279 | 5.1058E-34 |
| ben1_0192 | 566 | 18830 vfid 42249 vsiid 63086 ssid oligopeptide ABC transporter, ATP-binding protein | 243 | 3.8373E-86 |
| ben1_0193 | 622 | 18831 vfid 42251 vsiid 63088 ssid oligopeptide ABC transporter, ATP-binding protein | 269 | 1.4552E-62 |
| ben1_0196 | 440 | 15351 vfid 35292 vsiid 56129 ssid DNA methyltransferase                             | 266 | 2.2753E-37 |
| ben1_0202 | 814 | 19250 vfid 43089 vsiid 63926 ssid putative ATPase TraE                              | 652 | 4.4833E-20 |
| ben1_0203 | 306 | 15741 vfid 36072 vsiid 56909 ssid hypothetical protein BL1462                       | 230 | 8.1148E-26 |
| ben1_0224 | 117 | 20840 vfid 46268 vsiid 67105 ssid ISxac3 transposase                                | 106 | 2.9305E-15 |
| ben1_0230 | 609 | 24951 vfid 59810 vsiid 80677 ssid tetracycline resistance protein tetP              | 351 | 3.6136E-32 |
| ben1_0232 | 341 | 15439 vfid 35468 vsiid 56305 ssid cytosine-specific methyltransferase               | 352 | 9.7444E-46 |
| ben1_0240 | 351 | 3440 vfid 4486 vsiid 5050 ssid iron III transport ATP binding protein sfuC like     | 334 | 3.7033E-68 |

|           |     |                                                                                                 |     |            |
|-----------|-----|-------------------------------------------------------------------------------------------------|-----|------------|
| ben1_0244 | 219 | 18945 vfid 42479 vsiid 63316 ssid hypothetical protein SAV0801                                  | 192 | 2.2068E-28 |
| ben1_0256 | 451 | 27175 vfid 64285 vsiid 85153 ssid cytosolic leucyl aminopeptidase                               | 305 | 2.4213E-47 |
| ben1_0261 | 286 | 19333 vfid 43255 vsiid 64092 ssid IS600 ORF2                                                    | 279 | 3.852E-34  |
| ben1_0269 | 297 | 19333 vfid 43255 vsiid 64092 ssid IS600 ORF2                                                    | 279 | 5.1058E-34 |
| ben1_0276 | 277 | 20418 vfid 45424 vsiid 66261 ssid putative transcriptional regulator                            | 273 | 5.5564E-14 |
| ben1_0286 | 478 | 13372 vfid 21185 vsiid 40783 ssid pyruvate kinase                                               | 455 | 1.4404E-87 |
| ben1_0288 | 454 | 17467 vfid 39523 vsiid 60360 ssid pyridine nucleotide-disulfide family oxidoreductase           | 361 | 2.9385E-13 |
| ben1_0289 | 334 | 8164 vfid 10241 vsiid 12660 ssid hypothetical protein lmo0931                                   | 328 | 1.3298E-52 |
| ben1_0293 | 595 | 18794 vfid 42177 vsiid 63014 ssid pyridine nucleotide-disulfide oxidoreductase                  | 460 | 4.1636E-42 |
| ben1_0295 | 393 | 10521 vfid 17226 vsiid 25095 ssid RecName: Full=Acetate kinase                                  | 393 | 0          |
| ben1_0297 | 140 | 12151 vfid 18856 vsiid 35724 ssid RecName: Full=Probable phosphopantetheine adenylyltransferase | 140 | 1.5041E-71 |
| ben1_0298 | 573 | 10100 vfid 16805 vsiid 22462 ssid RecName: Full=Phosphoenolpyruvate-protein phosphotransferase  | 573 | 0          |
| ben1_0299 | 154 | 10543 vfid 17248 vsiid 25236 ssid PTS system, fructose-specific EIIA/HPr/EI components          | 134 | 4.6583E-30 |
| ben1_0318 | 240 | 20945 vfid 46478 vsiid 67315 ssid oxidoreductase                                                | 243 | 4.4103E-35 |
| ben1_0324 | 239 | 20945 vfid 46478 vsiid 67315 ssid oxidoreductase                                                | 242 | 3.7749E-30 |
| ben1_0328 | 225 | 2718 vfid 3176 vsiid 3738 ssid phosphoribosyl transferase PRTase II                             | 226 | 7.7334E-29 |
| ben1_0330 | 371 | 19118 vfid 42825 vsiid 63662 ssid protein kinase-like protein                                   | 282 | 2.4361E-24 |
| ben1_0348 | 234 | 21753 vfid 53688 vsiid 74555 ssid RecName: Full=Bacitracin transport ATP-binding protein bcrA   | 216 | 5.8657E-30 |
| ben1_0358 | 574 | 14026 vfid 22499 vsiid 42752 ssid putative lysil-tRNA synthetase LysU                           | 287 | 3.724E-18  |
| ben1_0364 | 286 | 19333 vfid 43255 vsiid 64092 ssid IS600 ORF2                                                    | 279 | 3.852E-34  |
| ben1_0370 | 88  | 18880 vfid 42349 vsiid 63186 ssid 30S ribosomal protein S15                                     | 87  | 1.1891E-19 |
| ben1_0374 | 291 | 19333 vfid 43255 vsiid 64092 ssid IS600 ORF2                                                    | 279 | 4.4798E-34 |
| ben1_0375 | 620 | 25269 vfid 60410 vsiid 81277 ssid ribosomal protection tetracycline resistance protein          | 134 | 4.3502E-13 |
| ben1_0395 | 117 | 20840 vfid 46268 vsiid 67105 ssid ISxac3 transposase                                            | 106 | 2.7643E-15 |
| ben1_0405 | 656 | 18590 vfid 41769 vsiid 62606 ssid transketolase, N-terminal subunit                             | 242 | 2.335E-31  |
| ben1_0416 | 278 | 12497 vfid 19203 vsiid 37909 ssid RecName: Full=Segregation and condensation protein A          | 253 | 9.6875E-15 |

|           |     |                                                                                    |     |            |
|-----------|-----|------------------------------------------------------------------------------------|-----|------------|
| ben1_0426 | 122 | 20840 vfid 46268 vsiid 67105 ssid ISxac3 transposase                               | 106 | 4.7695E-15 |
| ben1_0432 | 218 | 2718 vfid 3176 vsiid 3738 ssid phosphoribosyl transferase PRTase II                | 216 | 7.6077E-20 |
| ben1_0434 | 665 | 7609 vfid 9104 vsiid 11022 ssid Bacitracin transport ATP-binding protein bcrA      | 250 | 6.2735E-16 |
| ben1_0444 | 222 | 20562 vfid 45712 vsiid 66549 ssid cytidylate kinase                                | 209 | 6.7749E-32 |
| ben1_0448 | 90  | 10046 vfid 16751 vsiid 22126 ssid RecName: Full=DNA-binding protein HU-1           | 89  | 3.324E-18  |
| ben1_0453 | 286 | 19333 vfid 43255 vsiid 64092 ssid IS600 ORF2                                       | 279 | 3.852E-34  |
| ben1_0454 | 147 | 15408 vfid 35406 vsiid 56243 ssid Holliday junction-specific endonuclease          | 145 | 5.8548E-13 |
| ben1_0461 | 447 | 8319 vfid 10510 vsiid 13043 ssid flagellar biosynthesis regulator FlhF             | 182 | 9.3385E-14 |
| ben1_0487 | 375 | 17452 vfid 39493 vsiid 60330 ssid tRNA-specific 2-thiouridylase MnmA               | 376 | 1.3738E-93 |
| ben1_0490 | 317 | 21667 vfid 53531 vsiid 74398 ssid COG0451: Nucleoside-diphosphate-sugar epimerases | 289 | 2.1364E-28 |
| ben1_0493 | 428 | 18497 vfid 41583 vsiid 62420 ssid trigger factor                                   | 409 | 4.2976E-51 |
| ben1_0495 | 411 | 20579 vfid 45746 vsiid 66583 ssid recombination factor protein RarA                | 420 | 2.983E-56  |
| ben1_0511 | 453 | 26455 vfid 62854 vsiid 83722 ssid eukaryotic translation initiation factor 4A      | 326 | 3.7054E-38 |
| ben1_0515 | 754 | 2506 vfid 2750 vsiid 3108 ssid GTP pyrophosphokinase                               | 737 | 7.928E-128 |
| ben1_0521 | 547 | 18812 vfid 42213 vsiid 63050 ssid DAK2 domain protein                              | 563 | 3.0845E-91 |
| ben1_0527 | 270 | 19071 vfid 42731 vsiid 63568 ssid ABC transporter ATP-binding protein              | 197 | 4.6856E-35 |
| ben1_0529 | 418 | 8319 vfid 10510 vsiid 13043 ssid flagellar biosynthesis regulator FlhF             | 212 | 2.5737E-15 |
| ben1_0542 | 412 | 18535 vfid 41659 vsiid 62496 ssid selenocysteine lyase                             | 412 | 4.9582E-70 |
| ben1_0549 | 217 | 18887 vfid 42363 vsiid 63200 ssid hypothetical protein gbs0204                     | 165 | 2.8954E-15 |
| ben1_0550 | 471 | 20442 vfid 45472 vsiid 66309 ssid 4-hydroxyphenylacetate catabolism                | 483 | 2.3901E-60 |
| ben1_0558 | 314 | 16120 vfid 36830 vsiid 57667 ssid ABC-type transporter, ATPase component           | 151 | 3.1992E-27 |
| ben1_0568 | 117 | 20840 vfid 46268 vsiid 67105 ssid ISxac3 transposase                               | 106 | 2.7643E-15 |
| ben1_0572 | 392 | 18230 vfid 41049 vsiid 61886 ssid Oye family NADH-dependent flavin oxidoreductase  | 363 | 8.7283E-22 |
| ben1_0573 | 345 | 8164 vfid 10241 vsiid 12660 ssid hypothetical protein lmo0931                      | 322 | 1.0382E-55 |
| ben1_0579 | 385 | 13786 vfid 22019 vsiid 42032 ssid N-acetylglucosamine-6-phosphate deacetylase      | 333 | 3.697E-24  |
| ben1_0588 | 452 | 18504 vfid 41597 vsiid 62434 ssid pyridine nucleotide-disulfide oxidoreductase     | 452 | 1.9396E-45 |



|           |     |                                                                                                                      |     |            |
|-----------|-----|----------------------------------------------------------------------------------------------------------------------|-----|------------|
| ben1_0593 | 402 | 20298 vfid 45184 vsiid 66021 ssid DNA polymerase V subunit UmuC                                                      | 211 | 4.3435E-12 |
| ben1_0599 | 226 | 20416 vfid 45420 vsiid 66257 ssid N-acetylmannosamine-6-phosphate 2-epimerase                                        | 232 | 3.8984E-29 |
| ben1_0603 | 295 | 16336 vfid 37262 vsiid 58099 ssid N-acetylneuraminase lyase                                                          | 274 | 8.1526E-53 |
| ben1_0609 | 216 | 19333 vfid 43255 vsiid 64092 ssid IS600 ORF2                                                                         | 215 | 9.9371E-22 |
| ben1_0656 | 372 | 18490 vfid 41569 vsiid 62406 ssid dnaJ protein                                                                       | 363 | 6.219E-56  |
| ben1_0659 | 340 | 18487 vfid 41563 vsiid 62400 ssid heat-inducible transcription repressor                                             | 355 | 1.1349E-23 |
| ben1_0665 | 459 | 7758 vfid 9414 vsiid 11409 ssid flagellum-specific ATP synthase                                                      | 426 | 2.8188E-32 |
| ben1_0666 | 515 | 8557 vfid 10986 vsiid 13757 ssid type III secretion system ATPase                                                    | 292 | 1.6946E-21 |
| ben1_0676 | 117 | 20840 vfid 46268 vsiid 67105 ssid ISxac3 transposase                                                                 | 106 | 2.7643E-15 |
| ben1_0692 | 281 | 18808 vfid 42205 vsiid 63042 ssid fructose-bisphosphate aldolase                                                     | 289 | 9.2313E-36 |
| ben1_0704 | 316 | 20916 vfid 46420 vsiid 67257 ssid DNA helicase related protein                                                       | 330 | 5.2113E-16 |
| ben1_0706 | 888 | 20916 vfid 46420 vsiid 67257 ssid DNA helicase related protein                                                       | 613 | 8.2084E-89 |
| ben1_0707 | 161 | 15741 vfid 36072 vsiid 56909 ssid hypothetical protein BL1462                                                        | 140 | 7.4167E-14 |
| ben1_0711 | 282 | 19333 vfid 43255 vsiid 64092 ssid IS600 ORF2                                                                         | 268 | 3.9027E-31 |
| ben1_0735 | 414 | 18837 vfid 42263 vsiid 63100 ssid tyrosyl-tRNA synthetase                                                            | 416 | 9.721E-101 |
| ben1_0737 | 202 | 18859 vfid 42307 vsiid 63144 ssid tRNA binding domain protein                                                        | 173 | 7.2886E-16 |
| ben1_0738 | 279 | 18889 vfid 42367 vsiid 63204 ssid DegV family protein                                                                | 281 | 1.1235E-11 |
| ben1_0750 | 214 | 16705 vfid 38000 vsiid 58837 ssid putative transposase                                                               | 178 | 5.0285E-13 |
| ben1_0751 | 310 | 10804 vfid 72642 vsiid 98916 ssid RecName: Full=Carbamate kinase-like protein YqeA                                   | 304 | 7.4077E-89 |
| ben1_0755 | 365 | 16625 vfid 37840 vsiid 58677 ssid ornithine carbamoyltransferase 2, chain F                                          | 324 | 6.5457E-44 |
| ben1_0756 | 295 | 21753 vfid 53688 vsiid 74555 ssid RecName: Full=Bacitracin transport ATP-binding protein bcrA                        | 303 | 1.0087E-37 |
| ben1_0763 | 132 | 18893 vfid 42375 vsiid 63212 ssid 30S ribosomal protein S9                                                           | 125 | 1.29E-32   |
| ben1_0764 | 151 | 18605 vfid 41799 vsiid 62636 ssid 50S ribosomal protein L13                                                          | 143 | 6.7368E-36 |
| ben1_0768 | 303 | 18635 vfid 41859 vsiid 62696 ssid amino acid ABC transporter, ATP-binding protein                                    | 236 | 3.5853E-31 |
| ben1_0769 | 408 | 3073 vfid 3813 vsiid 4375 ssid type I secretion channel. This type I complex secretes the rtx repeat containing RtxA | 226 | 2.6266E-30 |
| ben1_0776 | 74  | 20588 vfid 45764 vsiid 66601 ssid translation initiation factor IF-1                                                 | 70  | 1.4263E-21 |

|           |     |                                                                                       |     |            |
|-----------|-----|---------------------------------------------------------------------------------------|-----|------------|
| ben1_0783 | 180 | 12424 vfid 19130 vsiid 37426 ssid RecName: Full=50S ribosomal protein L6              | 179 | 1.3602E-36 |
| ben1_0801 | 532 | 18584 vfid 41757 vsiid 62594 ssid alpha amylase family protein                        | 536 | 3.389E-138 |
| ben1_0814 | 485 | 16234 vfid 37058 vsiid 57895 ssid putative amidase                                    | 444 | 1.1004E-14 |
| ben1_0821 | 722 | 20078 vfid 44744 vsiid 65581 ssid DNA helicase IV                                     | 363 | 2.4771E-24 |
| ben1_0840 | 297 | 19333 vfid 43255 vsiid 64092 ssid IS600 ORF2                                          | 279 | 5.1058E-34 |
| ben1_0842 | 249 | 23670 vfid 57346 vsiid 78213 ssid macrolide transporter ATP-binding /permease protein | 232 | 2.5694E-29 |
| ben1_0845 | 396 | 16586 vfid 37762 vsiid 58599 ssid putative aminotransferase                           | 388 | 2.1966E-50 |
| ben1_0860 | 248 | 7423 vfid 8732 vsiid 10650 ssid triosephosphate isomerase                             | 244 | 4.484E-43  |
| ben1_0862 | 531 | 19075 vfid 42739 vsiid 63576 ssid phosphoglyceromutase                                | 520 | 2.5242E-52 |
| ben1_0881 | 152 | 5807 vfid 12395 vsiid 16234 ssid RecName: Full=Multiphosphoryl transfer protein       | 144 | 1.4006E-11 |
| ben1_0884 | 286 | 19333 vfid 43255 vsiid 64092 ssid IS600 ORF2                                          | 279 | 3.852E-34  |
| ben1_0893 | 286 | 19333 vfid 43255 vsiid 64092 ssid IS600 ORF2                                          | 279 | 3.852E-34  |
| ben1_0908 | 310 | 10977 vfid 17682 vsiid 28323 ssid RecName: Full=Carbamate kinase                      | 313 | 2.4008E-90 |
| ben1_0916 | 261 | 16335 vfid 37260 vsiid 58097 ssid N-acetylmannosamine kinase                          | 256 | 7.0259E-11 |
| ben1_0919 | 301 | 10804 vfid 72642 vsiid 98916 ssid RecName: Full=Carbamate kinase-like protein YqeA    | 294 | 1.5941E-88 |
| ben1_0929 | 525 | 13284 vfid 20593 vsiid 40096 ssid type III secretion system ATPase                    | 344 | 1.644E-35  |
| ben1_0942 | 286 | 19333 vfid 43255 vsiid 64092 ssid IS600 ORF2                                          | 279 | 3.852E-34  |
| ben1_0945 | 216 | 18499 vfid 41587 vsiid 62424 ssid CTP synthetase                                      | 208 | 8.3273E-56 |
| ben1_0947 | 286 | 19333 vfid 43255 vsiid 64092 ssid IS600 ORF2                                          | 279 | 1.2596E-33 |
| ben1_0972 | 234 | 21750 vfid 53682 vsiid 74549 ssid hypothetical protein pLEW6932_p25                   | 216 | 7.6609E-30 |
| ben1_0977 | 643 | 15734 vfid 36058 vsiid 56895 ssid DNA topoisomerase III                               | 575 | 4.4964E-20 |
| ben1_0986 | 310 | 2935 vfid 3610 vsiid 4172 ssid thioredoxin                                            | 309 | 6.714E-54  |
| ben1_0995 | 122 | 20840 vfid 46268 vsiid 67105 ssid ISxac3 transposase                                  | 106 | 4.7695E-15 |
| ben1_0999 | 265 | 3471 vfid 4548 vsiid 5112 ssid Dnase                                                  | 260 | 3.4008E-34 |
| ben1_1002 | 219 | 15439 vfid 35468 vsiid 56305 ssid cytosine-specific methyltransferase                 | 175 | 1.5069E-20 |
| ben1_1003 | 247 | 13931 vfid 22309 vsiid 42467 ssid hypothetical protein                                | 79  | 2.157E-12  |

|           |      |                                                                                     |      |            |
|-----------|------|-------------------------------------------------------------------------------------|------|------------|
| ben1_1004 | 344  | 17449 vfid 39487 vsiid 60324 ssid ribose-phosphate pyrophosphokinase                | 320  | 4.2285E-61 |
| ben1_1008 | 438  | 18742 vfid 42073 vsiid 62910 ssid prophage LambdaSa2, replicative DNA helicase      | 431  | 1.7268E-76 |
| ben1_1011 | 441  | 18885 vfid 42359 vsiid 63196 ssid cysteinyI-tRNA synthetase                         | 448  | 3.718E-80  |
| ben1_1012 | 244  | 18887 vfid 42363 vsiid 63200 ssid hypothetical protein gbs0204                      | 246  | 2.7005E-32 |
| ben1_1019 | 481  | 18830 vfid 42249 vsiid 63086 ssid oligopeptide ABC transporter, ATP-binding protein | 324  | 2.7419E-81 |
| ben1_1020 | 444  | 18831 vfid 42251 vsiid 63088 ssid oligopeptide ABC transporter, ATP-binding protein | 173  | 9.405E-46  |
| ben1_1022 | 308  | 7989 vfid 9896 vsiid 12140 ssid UDP-galactopyranose mutase                          | 303  | 3.4755E-48 |
| ben1_1023 | 334  | 2720 vfid 3180 vsiid 3742 ssid UDP-glucose 4-epimerase                              | 333  | 3.5821E-59 |
| ben1_1028 | 320  | 18831 vfid 42251 vsiid 63088 ssid oligopeptide ABC transporter, ATP-binding protein | 173  | 9.0476E-46 |
| ben1_1030 | 308  | 7989 vfid 9896 vsiid 12140 ssid UDP-galactopyranose mutase                          | 303  | 3.4755E-48 |
| ben1_1031 | 334  | 2720 vfid 3180 vsiid 3742 ssid UDP-glucose 4-epimerase                              | 333  | 3.5821E-59 |
| ben1_1037 | 320  | 18831 vfid 42251 vsiid 63088 ssid oligopeptide ABC transporter, ATP-binding protein | 173  | 9.0476E-46 |
| ben1_1038 | 308  | 7989 vfid 9896 vsiid 12140 ssid UDP-galactopyranose mutase                          | 303  | 3.4755E-48 |
| ben1_1039 | 334  | 2720 vfid 3180 vsiid 3742 ssid UDP-glucose 4-epimerase                              | 333  | 3.5821E-59 |
| ben1_1042 | 304  | 2725 vfid 3190 vsiid 3752 ssid glycosyltransferase 2                                | 262  | 4.6502E-14 |
| ben1_1044 | 304  | 2725 vfid 3190 vsiid 3752 ssid glycosyltransferase 2                                | 262  | 4.6502E-14 |
| ben1_1045 | 290  | 7931 vfid 9789 vsiid 11985 ssid UDP-glucose pyrophosphorylase                       | 291  | 2.5489E-62 |
| ben1_1063 | 1291 | 18839 vfid 42267 vsiid 63104 ssid DNA-directed RNA polymerase subunit beta          | 1096 | 0          |
| ben1_1065 | 153  | 20749 vfid 46086 vsiid 66923 ssid ISxac3 transposase                                | 142  | 1.5037E-21 |
| ben1_1075 | 447  | 18504 vfid 41597 vsiid 62434 ssid pyridine nucleotide-disulfide oxidoreductase      | 323  | 2.5402E-15 |
| ben1_1092 | 117  | 20840 vfid 46268 vsiid 67105 ssid ISxac3 transposase                                | 106  | 2.7643E-15 |
| ben1_0578 | 318  | 18809 vfid 42207 vsiid 63044 ssid L-2-hydroxyisocaproate dehydrogenase              | 302  | 1.7928E-44 |
| ben1_0040 | 648  | 15449 vfid 35488 vsiid 56325 ssid hypothetical protein bll8085                      | 370  | 2.5992E-14 |
| ben1_0190 | 414  | 18828 vfid 42245 vsiid 63082 ssid oligopeptide ABC transporter, permease protein    | 351  | 7.0198E-15 |
| ben1_0191 | 336  | 18829 vfid 42247 vsiid 63084 ssid hypothetical protein gbs0146                      | 234  | 2.2139E-21 |
| ben1_0242 | 1042 | 15195 vfid 24393 vsiid 45213 ssid Putrescine transport system permease protein      | 246  | 9.0241E-28 |

|           |      |                                                                                                                      |     |            |
|-----------|------|----------------------------------------------------------------------------------------------------------------------|-----|------------|
| ben1_0312 | 968  | 8141 vfid 10194 vsiid 12588 ssid Mg2+ transporter                                                                    | 924 | 1.7821E-91 |
| ben1_0382 | 341  | 7988 vfid 9895 vsiid 12139 ssid phosphatidate cytidyltransferase                                                     | 186 | 7.1978E-26 |
| ben1_0431 | 602  | 18876 vfid 42341 vsiid 63178 ssid ascorbate-specific PTS system enzyme IIC                                           | 448 | 3.5602E-93 |
| ben1_0475 | 623  | 16270 vfid 37130 vsiid 57967 ssid hemolysin B                                                                        | 595 | 1.4241E-57 |
| ben1_0476 | 617  | 3073 vfid 3813 vsiid 4375 ssid type I secretion channel. This type I complex secretes the rtx repeat containing RtxA | 581 | 1.072E-47  |
| ben1_0513 | 1384 | 11742 vfid 18447 vsiid 33165 ssid Lin1562 protein                                                                    | 205 | 1.5339E-12 |
| ben1_0602 | 567  | 20417 vfid 45422 vsiid 66259 ssid putative sodium/glucose cotransporter                                              | 459 | 3.1082E-72 |
| ben1_0694 | 628  | 18872 vfid 42333 vsiid 63170 ssid hypothetical protein gbs0189                                                       | 465 | 6.1371E-30 |
| ben1_0779 | 482  | 10514 vfid 75272 vsiid 102566 ssid RecName: Full=Protein translocase subunit SecY                                    | 482 | 0          |
| ben1_0802 | 515  | 18583 vfid 41755 vsiid 62592 ssid PTS system, IIABC components                                                       | 476 | 1.6089E-85 |
| ben1_0912 | 942  | 8141 vfid 10194 vsiid 12588 ssid Mg2+ transporter                                                                    | 920 | 0          |
| ben1_0923 | 942  | 8141 vfid 10194 vsiid 12588 ssid Mg2+ transporter                                                                    | 920 | 0          |
| ben1_0951 | 910  | 8141 vfid 10194 vsiid 12588 ssid Mg2+ transporter                                                                    | 912 | 8.653E-128 |
| ben1_1017 | 357  | 18828 vfid 42245 vsiid 63082 ssid oligopeptide ABC transporter, permease protein                                     | 292 | 3.3538E-30 |
| ben1_1018 | 336  | 18829 vfid 42247 vsiid 63084 ssid hypothetical protein gbs0146                                                       | 215 | 2.4618E-29 |

**Supplementary Table 5. Enrichment analysis of Virulence Genes in Ben1 Genome**

| COG                                                           | Virulence | Ben1 Gene | Pvalue    | FDR       |
|---------------------------------------------------------------|-----------|-----------|-----------|-----------|
| Cell envelope biogenesis, outer membrane                      | 10        | 27        | 0.0056461 | 0.1129215 |
| Carbohydrate transport and metabolism                         | 15        | 54        | 0.0296787 | 0.1978577 |
| Function unknown                                              | 10        | 33        | 0.0294783 | 0.1978577 |
| Inorganic ion transport and metabolism                        | 6         | 22        | 0.096039  | 0.3306801 |
| Lipid metabolism                                              | 3         | 9         | 0.0674386 | 0.3306801 |
| Posttranslational modification, protein turnover, chaperones  | 5         | 18        | 0.099204  | 0.3306801 |
| Amino acid transport and metabolism                           | 8         | 40        | 0.3187965 | 0.5193114 |
| Coenzyme metabolism                                           | 3         | 15        | 0.2992293 | 0.5193114 |
| Defense mechanisms                                            | 2         | 10        | 0.279915  | 0.5193114 |
| DNA replication, recombination, and repair                    | 25        | 121       | 0.2257794 | 0.5193114 |
| General function prediction only                              | 12        | 59        | 0.2917073 | 0.5193114 |
| Secondary metabolites biosynthesis, transport, and catabolism | 0         | 2         | 0.3375524 | 0.5193114 |
| Transcription                                                 | 6         | 29        | 0.2846974 | 0.5193114 |
| Intracellular trafficking and secretion                       | 1         | 7         | 0.3846124 | 0.5494462 |
| Cell division and chromosome partitioning                     | 1         | 10        | 0.5815067 | 0.6871472 |
| Energy production and conversion                              | 4         | 27        | 0.5840751 | 0.6871472 |
| Nucleotide transport and metabolism                           | 5         | 31        | 0.5308745 | 0.6871472 |
| Signal transduction mechanisms                                | 0         | 5         | 0.6434156 | 0.7149062 |
| Translation, ribosomal structure and biogenesis               | 16        | 110       | 0.8479959 | 0.8926272 |
| Not in COG                                                    | 62        | 414       | 0.9913223 | 0.9913223 |

**Supplementary Table 6. Known epitopes in Ben1 genome**

| Epitope ID | Epitope Length | query from | query to | Ben1 Gene | Hit len | hit from | hit to | align lenth | identity | Product                                   | Epitope Organism                            |
|------------|----------------|------------|----------|-----------|---------|----------|--------|-------------|----------|-------------------------------------------|---------------------------------------------|
| 9134       | 14             | 1          | 14       | ben1_0508 | 506     | 235      | 248    | 14          | 13       | RNA polymerase sigma-subunit              | Escherichia coli                            |
| 16773      | 10             | 1          | 9        | ben1_0166 | 395     | 211      | 219    | 9           | 9        | Elongation factor Tu                      | Mycobacterium tuberculosis                  |
| 20072      | 17             | 1          | 17       | ben1_0657 | 591     | 377      | 393    | 17          | 16       | Chaperone protein dnaK                    | Mycobacterium leprae                        |
| 30110      | 21             | 1          | 21       | ben1_0657 | 591     | 131      | 151    | 21          | 19       | Heat shock 70 kDa protein                 | Trypanosoma cruzi                           |
| 37476      | 10             | 1          | 10       | ben1_0657 | 591     | 362      | 371    | 10          | 10       | DnaK                                      | Mycobacterium tuberculosis                  |
| 48749      | 20             | 2          | 20       | ben1_0657 | 591     | 436      | 454    | 19          | 18       | heat shock protein 70, hsp70A2            | Mycobacterium leprae                        |
| 64575      | 20             | 1          | 20       | ben1_0657 | 591     | 375      | 394    | 20          | 18       | heat shock protein 70, hsp70A2            | Mycobacterium leprae                        |
| 93051      | 9              | 1          | 9        | ben1_0991 | 946     | 106      | 114    | 9           | 9        | Excinuclease ABC, A subunit               | Campylobacter jejuni RM1221                 |
| 100499     | 10             | 1          | 10       | ben1_0187 | 434     | 185      | 194    | 10          | 9        | lethal factor                             | Bacillus anthracis                          |
| 108788     | 9              | 1          | 9        | ben1_1064 | 1255    | 469      | 477    | 9           | 9        | DNA-directed RNA polymerase beta' subunit | Bacillus anthracis                          |
| 109762     | 9              | 1          | 9        | ben1_0166 | 395     | 98       | 106    | 9           | 9        | Tuf-2, translation elongation factor Tu   | Brucella abortus 2308                       |
| 109991     | 9              | 1          | 9        | ben1_0163 | 139     | 54       | 62     | 9           | 9        | 30S ribosomal protein S12                 | Bacillus anthracis                          |
| 110042     | 9              | 1          | 9        | ben1_0991 | 946     | 517      | 525    | 9           | 9        | Excinuclease ABC subunit A                | Yersinia pestis Nepal516                    |
| 144238     | 13             | 1          | 13       | ben1_0657 | 591     | 360      | 372    | 13          | 12       | 70 kDa heat shock chaperonin protein      | Mycobacterium avium subsp. paratuberculosis |
| 144240     | 13             | 1          | 13       | ben1_0657 | 591     | 365      | 377    | 13          | 12       | 70 kDa heat shock chaperonin protein      | Mycobacterium avium subsp. paratuberculosis |
| 144258     | 14             | 1          | 14       | ben1_0657 | 591     | 374      | 387    | 14          | 13       | 70 kDa heat shock chaperonin protein      | Mycobacterium avium subsp. paratuberculosis |
| 144357     | 14             | 1          | 14       | ben1_0657 | 591     | 166      | 179    | 14          | 13       | 70 kDa heat shock chaperonin protein      | Mycobacterium avium subsp. paratuberculosis |
| 144366     | 14             | 1          | 14       | ben1_0657 | 591     | 116      | 129    | 14          | 13       | 70 kDa heat shock chaperonin protein      | Mycobacterium avium subsp. paratuberculosis |
| 144409     | 14             | 1          | 14       | ben1_0657 | 591     | 369      | 382    | 14          | 13       | 70 kDa heat shock chaperonin protein      | Mycobacterium avium subsp. paratuberculosis |
| 144417     | 14             | 1          | 14       | ben1_0657 | 591     | 146      | 159    | 14          | 14       | 70 kDa heat shock chaperonin protein      | Mycobacterium avium subsp. paratuberculosis |
| 144434     | 14             | 1          | 14       | ben1_0657 | 591     | 438      | 451    | 14          | 13       | 70 kDa heat shock chaperonin protein      | Mycobacterium avium subsp. paratuberculosis |
| 144442     | 14             | 1          | 14       | ben1_0657 | 591     | 443      | 456    | 14          | 13       | 70 kDa heat shock chaperonin protein      | Mycobacterium avium subsp. paratuberculosis |
| 144497     | 14             | 1          | 14       | ben1_0657 | 591     | 432      | 445    | 14          | 13       | 70 kDa heat shock chaperonin protein      | Mycobacterium avium subsp. paratuberculosis |

|        |    |   |    |           |     |     |     |    |    |                                                     |                                                                  |
|--------|----|---|----|-----------|-----|-----|-----|----|----|-----------------------------------------------------|------------------------------------------------------------------|
| 144533 | 14 | 1 | 14 | ben1_0657 | 591 | 379 | 392 | 14 | 13 | 70 kDa heat shock chaperonin protein                | Mycobacterium avium subsp. paratuberculosis                      |
| 154918 | 10 | 1 | 10 | ben1_0657 | 591 | 144 | 153 | 10 | 9  | unnamed protein product                             | Trypanosoma cruzi                                                |
| 155120 | 10 | 1 | 10 | ben1_0657 | 591 | 362 | 371 | 10 | 9  | unnamed protein product                             | Trypanosoma cruzi                                                |
| 156105 | 10 | 1 | 10 | ben1_0657 | 591 | 309 | 318 | 10 | 9  | unnamed protein product                             | Trypanosoma cruzi                                                |
| 159328 | 10 | 1 | 10 | ben1_0552 | 898 | 117 | 126 | 10 | 9  | DNA topoisomerase IV subunit A                      | Francisella tularensis subsp. holarctica LVS                     |
| 160456 | 10 | 1 | 10 | ben1_0049 | 648 | 136 | 145 | 10 | 9  | DNA polymerase III subunit gamma and tau            | Francisella tularensis subsp. holarctica LVS                     |
| 197843 | 15 | 1 | 15 | ben1_0166 | 395 | 96  | 110 | 15 | 15 | elongation factor Tu                                | Mycobacterium tuberculosis                                       |
| 206238 | 15 | 1 | 15 | ben1_0927 | 475 | 249 | 263 | 15 | 15 | ATP synthase subunit beta                           | Mycobacterium tuberculosis                                       |
| 206242 | 15 | 1 | 15 | ben1_0657 | 591 | 360 | 374 | 15 | 14 | molecular chaperone DnaK                            | Mycobacterium tuberculosis                                       |
| 209960 | 15 | 1 | 15 | ben1_0506 | 456 | 196 | 210 | 15 | 15 | glycine-tRNA synthetase subunit beta                | Mycobacterium tuberculosis                                       |
| 213022 | 15 | 1 | 15 | ben1_0356 | 600 | 520 | 534 | 15 | 14 | Elongation factor 4                                 | Mycobacterium tuberculosis                                       |
| 214917 | 15 | 1 | 15 | ben1_0660 | 713 | 46  | 60  | 15 | 14 | ATP-dependent Clp protease ATP-binding subunit ClpB | Mycobacterium tuberculosis                                       |
| 220101 | 15 | 2 | 15 | ben1_0508 | 506 | 255 | 268 | 14 | 14 | RNA polymerase sigma factor                         | Mycobacterium tuberculosis                                       |
| 220102 | 15 | 2 | 15 | ben1_0508 | 506 | 255 | 268 | 14 | 13 | RNA polymerase sigma factor                         | Mycobacterium tuberculosis                                       |
| 228171 | 15 | 1 | 15 | ben1_0278 | 451 | 40  | 54  | 15 | 14 | uncharacterized protein                             | Phleum pratense                                                  |
| 228399 | 15 | 1 | 14 | ben1_0278 | 451 | 105 | 118 | 14 | 13 | uncharacterized protein                             | Phleum pratense                                                  |
| 229086 | 13 | 2 | 13 | ben1_0810 | 288 | 253 | 264 | 12 | 12 | 5,10-methylene-tetrahydrofolate dehydrogenase       | Salmonella enterica subsp. enterica serovar Typhimurium str. LT2 |

**Supplementary Table 7. Domain distribution in Mmm genomes**

| Domain    | Domain Description                                                     | Ben1 | Ben50 | Ben181 | Ben326 | Ben468 | Member Variation |
|-----------|------------------------------------------------------------------------|------|-------|--------|--------|--------|------------------|
| pfam00004 | AAA, ATPase family associated with various cellular activities (AAA)   | 7    | 7     | 7      | 7      | 7      |                  |
| pfam00005 | ABC_tran, ABC transporter                                              | 23   | 23    | 25     | 21     | 23     | yes              |
| pfam00006 | ATP-synt_ab, ATP synthase alpha/beta family, nucleotide-binding domain | 4    | 4     | 4      | 4      | 4      |                  |
| pfam00009 | GTP_EFTU, Elongation factor Tu GTP binding domain                      | 9    | 9     | 9      | 9      | 9      |                  |
| pfam00012 | HSP70, Hsp70 protein                                                   | 1    | 1     | 1      | 1      | 1      |                  |
| pfam00025 | Arf, ADP-ribosylation factor family                                    | 1    | 1     | 1      | 1      | 1      |                  |
| pfam00035 | dsrm, Double-stranded RNA binding motif                                | 1    | 1     | 0      | 1      | 1      | yes              |
| pfam00038 | Filament, Intermediate filament protein                                | 1    | 1     | 1      | 1      | 0      | yes              |
| pfam00044 | Gp_dh_N, Glyceraldehyde 3-phosphate dehydrogenase, NAD binding domain  | 1    | 1     | 1      | 1      | 1      |                  |
| pfam00056 | Ldh_1_N, lactate/malate dehydrogenase, NAD binding domain              | 1    | 1     | 1      | 1      | 1      |                  |
| pfam00069 | Pkinase, Protein kinase domain                                         | 1    | 1     | 1      | 1      | 1      |                  |
| pfam00070 | Pyr_redox, Pyridine nucleotide-disulphide oxidoreductase               | 5    | 5     | 4      | 5      | 5      | yes              |
| pfam00071 | Ras, Ras family                                                        | 1    | 1     | 0      | 1      | 1      | yes              |
| pfam00075 | RNase_H, RNase H                                                       | 1    | 1     | 1      | 1      | 1      |                  |
| pfam00082 | Peptidase_S8, Subtilase family                                         | 1    | 1     | 1      | 1      | 1      |                  |
| pfam00085 | Thioredoxin, Thioredoxin                                               | 1    | 1     | 1      | 1      | 1      |                  |
| pfam00091 | Tubulin, Tubulin/FtsZ family, GTPase domain                            | 1    | 1     | 1      | 1      | 1      |                  |
| pfam00106 | adh_short, short chain dehydrogenase                                   | 3    | 3     | 3      | 3      | 3      |                  |
| pfam00112 | Peptidase_C1, Papain family cysteine protease                          | 1    | 1     | 1      | 1      | 1      |                  |
| pfam00113 | Enolase_C, Enolase, C-terminal TIM barrel domain                       | 1    | 1     | 1      | 1      | 1      |                  |
| pfam00117 | GATase, Glutamine amidotransferase class-I                             | 2    | 2     | 2      | 2      | 2      |                  |
| pfam00119 | ATP-synt_A, ATP synthase A chain                                       | 1    | 1     | 1      | 1      | 1      |                  |
| pfam00121 | TIM, Triosephosphate isomerase                                         | 1    | 1     | 1      | 1      | 1      |                  |



|           |                                                                           |   |   |   |   |   |     |
|-----------|---------------------------------------------------------------------------|---|---|---|---|---|-----|
| pfam00122 | E1-E2_ATPase, E1-E2 ATPase                                                | 4 | 4 | 4 | 4 | 3 | yes |
| pfam00128 | Alpha-amylase, Alpha amylase, catalytic domain                            | 1 | 1 | 1 | 1 | 1 |     |
| pfam00133 | tRNA-synt_1, tRNA synthetases class I (I, L, M and V)                     | 5 | 5 | 5 | 5 | 5 |     |
| pfam00137 | ATP-synt_C, ATP synthase subunit C                                        | 1 | 1 | 1 | 1 | 1 |     |
| pfam00144 | Beta-lactamase, Beta-lactamase                                            | 1 | 1 | 1 | 1 | 1 |     |
| pfam00145 | DNA_methylase, C-5 cytosine-specific DNA methylase                        | 3 | 3 | 3 | 3 | 3 |     |
| pfam00149 | Metallophos, Calcineurin-like phosphoesterase                             | 1 | 1 | 1 | 1 | 1 |     |
| pfam00152 | tRNA-synt_2, tRNA synthetases class II (D, K and N)                       | 5 | 5 | 5 | 5 | 5 |     |
| pfam00154 | RecA, recA bacterial DNA recombination protein                            | 1 | 1 | 1 | 1 | 1 |     |
| pfam00155 | Aminotran_1_2, Aminotransferase class I and II                            | 2 | 2 | 2 | 2 | 2 |     |
| pfam00156 | Pribosyltran, Phosphoribosyl transferase domain                           | 5 | 5 | 5 | 5 | 5 |     |
| pfam00162 | PGK, Phosphoglycerate kinase                                              | 1 | 1 | 1 | 1 | 1 |     |
| pfam00163 | Ribosomal_S4, Ribosomal protein S4/S9 N-terminal domain                   | 1 | 1 | 1 | 1 | 1 |     |
| pfam00164 | Ribosomal_S12, Ribosomal protein S12                                      | 1 | 1 | 1 | 1 | 1 |     |
| pfam00171 | Aldedh, Aldehyde dehydrogenase family                                     | 1 | 1 | 1 | 1 | 1 |     |
| pfam00176 | SNF2_N, SNF2 family N-terminal domain                                     | 1 | 1 | 1 | 1 | 1 |     |
| pfam00177 | Ribosomal_S7, Ribosomal protein S7p/S5e                                   | 1 | 1 | 1 | 1 | 1 |     |
| pfam00181 | Ribosomal_L2, Ribosomal Proteins L2, RNA binding domain                   | 1 | 1 | 1 | 1 | 1 |     |
| pfam00185 | OTCace, Aspartate/ornithine carbamoyltransferase, Asp/Orn binding domain  | 1 | 1 | 1 | 1 | 1 |     |
| pfam00189 | Ribosomal_S3_C, Ribosomal protein S3, C-terminal domain                   | 1 | 1 | 1 | 1 | 1 |     |
| pfam00198 | 2-oxoacid_dh, 2-oxoacid dehydrogenases acyltransferase (catalytic domain) | 1 | 1 | 1 | 1 | 1 |     |
| pfam00203 | Ribosomal_S19, Ribosomal protein S19                                      | 1 | 1 | 1 | 1 | 1 |     |
| pfam00204 | DNA_gyraseB, DNA gyrase B                                                 | 2 | 2 | 2 | 2 | 2 |     |
| pfam00206 | Lyase_1, Lyase                                                            | 1 | 1 | 1 | 1 | 1 |     |
| pfam00213 | OSCP, ATP synthase delta (OSCP) subunit                                   | 1 | 1 | 1 | 1 | 1 |     |
| pfam00216 | Bac_DNA_binding, Bacterial DNA-binding protein                            | 1 | 1 | 1 | 1 | 1 |     |

|           |                                                                 |   |   |   |   |   |     |
|-----------|-----------------------------------------------------------------|---|---|---|---|---|-----|
| pfam00218 | IGPS, Indole-3-glycerol phosphate synthase                      | 1 | 1 | 1 | 1 | 1 |     |
| pfam00224 | PK, Pyruvate kinase, barrel domain                              | 1 | 1 | 1 | 1 | 1 |     |
| pfam00226 | DnaJ, DnaJ domain                                               | 1 | 1 | 1 | 1 | 1 |     |
| pfam00230 | MIP, Major intrinsic protein                                    | 1 | 1 | 1 | 1 | 1 |     |
| pfam00231 | ATP-synt, ATP synthase                                          | 1 | 1 | 1 | 1 | 1 |     |
| pfam00232 | Glyco_hydro_1, Glycosyl hydrolase family 1                      | 1 | 1 | 1 | 2 | 1 | yes |
| pfam00237 | Ribosomal_L22, Ribosomal protein L22p/L17e                      | 1 | 1 | 1 | 1 | 1 |     |
| pfam00238 | Ribosomal_L14, Ribosomal protein L14p/L23e                      | 1 | 1 | 1 | 1 | 1 |     |
| pfam00252 | Ribosomal_L16, Ribosomal protein L16p/L10e                      | 1 | 1 | 1 | 1 | 1 |     |
| pfam00253 | Ribosomal_S14, Ribosomal protein S14p/S29e                      | 1 | 1 | 1 | 1 | 1 |     |
| pfam00254 | FKBP_C, FKBP-type peptidyl-prolyl cis-trans isomerase           | 1 | 1 | 1 | 1 | 1 |     |
| pfam00261 | Tropomyosin, Tropomyosin                                        | 1 | 1 | 0 | 1 | 1 | yes |
| pfam00265 | TK, Thymidine kinase                                            | 1 | 1 | 1 | 1 | 1 |     |
| pfam00266 | Aminotran_5, Aminotransferase class-V                           | 1 | 1 | 1 | 1 | 1 |     |
| pfam00268 | Ribonuc_red_sm, Ribonucleotide reductase, small chain           | 1 | 1 | 1 | 1 | 1 |     |
| pfam00270 | DEAD, DEAD/DEAH box helicase                                    | 1 | 1 | 1 | 1 | 1 |     |
| pfam00271 | Helicase_C, Helicase conserved C-terminal domain                | 2 | 2 | 2 | 2 | 2 |     |
| pfam00276 | Ribosomal_L23, Ribosomal protein L23                            | 1 | 1 | 1 | 1 | 1 |     |
| pfam00281 | Ribosomal_L5, Ribosomal protein L5                              | 1 | 1 | 1 | 1 | 1 |     |
| pfam00291 | PALP, Pyridoxal-phosphate dependent enzyme                      | 1 | 1 | 1 | 1 | 1 |     |
| pfam00294 | PfkB, pfkB family carbohydrate kinase                           | 2 | 2 | 2 | 2 | 1 | yes |
| pfam00297 | Ribosomal_L3, Ribosomal protein L3                              | 1 | 1 | 1 | 1 | 1 |     |
| pfam00298 | Ribosomal_L11, Ribosomal protein L11, RNA binding domain        | 1 | 1 | 1 | 1 | 1 |     |
| pfam00306 | ATP-synt_ab_C, ATP synthase alpha/beta chain, C terminal domain | 3 | 3 | 3 | 3 | 3 |     |
| pfam00308 | Bac_DnaA, Bacterial dnaA protein                                | 2 | 2 | 2 | 2 | 2 |     |
| pfam00312 | Ribosomal_S15, Ribosomal protein S15                            | 1 | 1 | 1 | 1 | 1 |     |

|           |                                                                                   |   |   |   |   |   |     |
|-----------|-----------------------------------------------------------------------------------|---|---|---|---|---|-----|
| pfam00313 | CSD, 'Cold-shock' DNA-binding domain                                              | 1 | 1 | 1 | 1 | 1 |     |
| pfam00317 | Ribonuc_red_IgN, Ribonucleotide reductase, all-alpha domain                       | 1 | 1 | 1 | 1 | 1 |     |
| pfam00318 | Ribosomal_S2, Ribosomal protein S2                                                | 1 | 1 | 1 | 1 | 1 |     |
| pfam00324 | AA_permease, Amino acid permease                                                  | 5 | 5 | 5 | 5 | 5 |     |
| pfam00333 | Ribosomal_S5, Ribosomal protein S5, N-terminal domain                             | 1 | 1 | 1 | 1 | 1 |     |
| pfam00335 | Tetraspannin, Tetraspanin family                                                  | 1 | 1 | 1 | 1 | 1 |     |
| pfam00338 | Ribosomal_S10, Ribosomal protein S10p/S20e                                        | 1 | 1 | 1 | 1 | 1 |     |
| pfam00342 | PGI, Phosphoglucose isomerase                                                     | 1 | 1 | 1 | 1 | 1 |     |
| pfam00344 | SecY, SecY translocase                                                            | 1 | 1 | 1 | 1 | 1 |     |
| pfam00347 | Ribosomal_L6, Ribosomal protein L6                                                | 1 | 1 | 1 | 1 | 1 |     |
| pfam00356 | LacI, Bacterial regulatory proteins, lacI family                                  | 1 | 1 | 1 | 1 | 1 |     |
| pfam00358 | PTS_EIIA_1, phosphoenolpyruvate-dependent sugar phosphotransferase system, EIIA 1 | 1 | 1 | 1 | 1 | 1 |     |
| pfam00359 | PTS_EIIA_2, Phosphoenolpyruvate-dependent sugar phosphotransferase system, EIIA 2 | 4 | 4 | 4 | 4 | 4 |     |
| pfam00364 | Biotin_lipoyl, Biotin-requiring enzyme                                            | 2 | 2 | 2 | 2 | 2 |     |
| pfam00365 | PFK, Phosphofructokinase                                                          | 1 | 1 | 1 | 1 | 1 |     |
| pfam00366 | Ribosomal_S17, Ribosomal protein S17                                              | 1 | 1 | 1 | 1 | 1 |     |
| pfam00367 | PTS_EIIB, phosphotransferase system, EIIB                                         | 7 | 7 | 7 | 7 | 6 | yes |
| pfam00370 | FGGY_N, FGGY family of carbohydrate kinases, N-terminal domain                    | 2 | 2 | 2 | 2 | 2 |     |
| pfam00375 | SDF, Sodium:dicarboxylate symporter family                                        | 1 | 1 | 1 | 1 | 1 |     |
| pfam00380 | Ribosomal_S9, Ribosomal protein S9/S16                                            | 1 | 1 | 1 | 1 | 1 |     |
| pfam00381 | PTS-HPr, PTS HPr component phosphorylation site                                   | 1 | 1 | 1 | 1 | 1 |     |
| pfam00383 | dCMP_cyt_deam_1, Cytidine and deoxycytidylate deaminase zinc-binding region       | 2 | 2 | 2 | 2 | 2 |     |
| pfam00389 | 2-Hacid_dh, D-isomer specific 2-hydroxyacid dehydrogenase, catalytic domain       | 1 | 1 | 1 | 1 | 1 |     |
| pfam00391 | PEP-utilizers, PEP-utilising enzyme, mobile domain                                | 1 | 1 | 1 | 1 | 1 |     |
| pfam00398 | RrnaAD, Ribosomal RNA adenine dimethylase                                         | 1 | 1 | 1 | 1 | 1 |     |
| pfam00406 | ADK, Adenylate kinase                                                             | 1 | 1 | 1 | 1 | 1 |     |

|           |                                                                             |   |   |   |   |   |     |
|-----------|-----------------------------------------------------------------------------|---|---|---|---|---|-----|
| pfam00408 | PGM_PMM_IV, Phosphoglucomutase/phosphomannomutase, C-terminal domain        | 1 | 1 | 1 | 1 | 1 |     |
| pfam00410 | Ribosomal_S8, Ribosomal protein S8                                          | 1 | 1 | 1 | 1 | 1 |     |
| pfam00411 | Ribosomal_S11, Ribosomal protein S11                                        | 1 | 1 | 1 | 1 | 1 |     |
| pfam00416 | Ribosomal_S13, Ribosomal protein S13/S18                                    | 1 | 1 | 1 | 1 | 1 |     |
| pfam00430 | ATP-synt_B, ATP synthase B/B' CF(0)                                         | 1 | 1 | 1 | 1 | 1 |     |
| pfam00436 | SSB, Single-strand binding protein family                                   | 2 | 2 | 2 | 2 | 2 |     |
| pfam00437 | T2SE, Type II/IV secretion system protein                                   | 0 | 1 | 0 | 1 | 1 |     |
| pfam00438 | S-AdoMet_synt_N, S-adenosylmethionine synthetase, N-terminal domain         | 1 | 1 | 1 | 1 | 1 |     |
| pfam00444 | Ribosomal_L36, Ribosomal protein L36                                        | 1 | 1 | 1 | 1 | 1 |     |
| pfam00448 | SRP54, SRP54-type protein, GTPase domain                                    | 2 | 2 | 2 | 2 | 2 |     |
| pfam00453 | Ribosomal_L20, Ribosomal protein L20                                        | 1 | 1 | 1 | 1 | 1 |     |
| pfam00455 | DeoRC, DeoR C terminal sensor domain                                        | 2 | 2 | 2 | 2 | 1 | yes |
| pfam00456 | Transketolase_N, Transketolase, thiamine diphosphate binding domain         | 1 | 1 | 1 | 1 | 1 |     |
| pfam00464 | SHMT, Serine hydroxymethyltransferase                                       | 1 | 1 | 1 | 1 | 1 |     |
| pfam00465 | Fe-ADH, Iron-containing alcohol dehydrogenase                               | 1 | 1 | 1 | 1 | 1 |     |
| pfam00466 | Ribosomal_L10, Ribosomal protein L10                                        | 1 | 1 | 1 | 1 | 1 |     |
| pfam00468 | Ribosomal_L34, Ribosomal protein L34                                        | 1 | 1 | 1 | 1 | 1 |     |
| pfam00472 | RF-1, RF-1 domain                                                           | 1 | 1 | 1 | 1 | 1 |     |
| pfam00474 | SSF, Sodium:solute symporter family                                         | 1 | 1 | 1 | 1 | 1 |     |
| pfam00476 | DNA_pol_A, DNA polymerase family A                                          | 1 | 1 | 1 | 1 | 1 |     |
| pfam00478 | IMPDH, IMP dehydrogenase / GMP reductase domain                             | 2 | 2 | 2 | 2 | 2 |     |
| pfam00480 | ROK, ROK family                                                             | 3 | 2 | 4 | 3 | 3 | yes |
| pfam00481 | PP2C, Protein phosphatase 2C                                                | 1 | 1 | 1 | 1 | 1 |     |
| pfam00483 | NTP_transferase, Nucleotidyl transferase                                    | 2 | 2 | 2 | 1 | 2 | yes |
| pfam00485 | PRK, Phosphoribulokinase / Uridine kinase family                            | 1 | 1 | 1 | 1 | 1 |     |
| pfam00496 | SBP_bac_5, Bacterial extracellular solute-binding proteins, family 5 Middle | 2 | 2 | 2 | 2 | 2 |     |

|           |                                                                                   |   |   |   |   |   |     |
|-----------|-----------------------------------------------------------------------------------|---|---|---|---|---|-----|
| pfam00521 | DNA_topoisoIV, DNA gyrase/topoisomerase IV, subunit A                             | 2 | 2 | 2 | 2 | 2 |     |
| pfam00528 | BPD_transp_1, Binding-protein-dependent transport system inner membrane component | 9 | 8 | 9 | 9 | 8 | yes |
| pfam00533 | BRCT, BRCA1 C Terminus (BRCT) domain                                              | 1 | 1 | 0 | 1 | 1 | yes |
| pfam00535 | Glycos_transf_2, Glycosyl transferase family 2                                    | 4 | 3 | 2 | 2 | 4 | yes |
| pfam00542 | Ribosomal_L12, Ribosomal protein L7/L12 C-terminal domain                         | 1 | 1 | 1 | 1 | 1 |     |
| pfam00550 | PP-binding, Phosphopantetheine attachment site                                    | 1 | 1 | 1 | 1 | 1 |     |
| pfam00551 | Formyl_trans_N, Formyl transferase                                                | 1 | 1 | 1 | 1 | 1 |     |
| pfam00557 | Peptidase_M24, Metallopeptidase family M24                                        | 2 | 2 | 2 | 2 | 2 |     |
| pfam00561 | Abhydrolase_1, alpha/beta hydrolase fold                                          | 6 | 6 | 6 | 6 | 6 |     |
| pfam00562 | RNA_pol_Rpb2_6, RNA polymerase Rpb2, domain 6                                     | 1 | 1 | 1 | 1 | 1 |     |
| pfam00571 | CBS, CBS domain                                                                   | 1 | 1 | 1 | 1 | 1 |     |
| pfam00572 | Ribosomal_L13, Ribosomal protein L13                                              | 1 | 1 | 1 | 1 | 1 |     |
| pfam00573 | Ribosomal_L4, Ribosomal protein L4/L1 family                                      | 1 | 1 | 1 | 1 | 1 |     |
| pfam00575 | S1, S1 RNA binding domain                                                         | 1 | 1 | 1 | 1 | 1 |     |
| pfam00578 | AhpC-TSA, AhpC/TSA family                                                         | 1 | 1 | 1 | 1 | 1 |     |
| pfam00579 | tRNA-synt_1b, tRNA synthetases class I (W and Y)                                  | 2 | 2 | 2 | 2 | 2 |     |
| pfam00580 | UvrD-helicase, UvrD/REP helicase N-terminal domain                                | 1 | 1 | 1 | 1 | 1 |     |
| pfam00581 | Rhodanese, Rhodanese-like domain                                                  | 1 | 1 | 1 | 1 | 1 |     |
| pfam00587 | tRNA-synt_2b, tRNA synthetase class II core domain (G, H, P, S and T)             | 6 | 6 | 6 | 6 | 6 |     |
| pfam00588 | SpoU_methylase, SpoU rRNA Methylase family                                        | 3 | 3 | 3 | 3 | 3 |     |
| pfam00590 | TP_methylase, Tetrapyrrole (Corrin/Porphyrin) Methylases                          | 1 | 1 | 1 | 1 | 1 |     |
| pfam00591 | Glycos_transf_3, Glycosyl transferase family, a/b domain                          | 1 | 1 | 1 | 1 | 1 |     |
| pfam00623 | RNA_pol_Rpb1_2, RNA polymerase Rpb1, domain 2                                     | 1 | 1 | 1 | 1 | 1 |     |
| pfam00625 | Guanylate_kin, Guanylate kinase                                                   | 1 | 1 | 1 | 1 | 1 |     |
| pfam00627 | UBA, UBA/Ts-N domain                                                              | 1 | 1 | 1 | 1 | 1 |     |
| pfam00636 | Ribonuclease_3, Ribonuclease III domain                                           | 1 | 1 | 1 | 1 | 1 |     |

|           |                                                                              |    |    |    |    |    |     |
|-----------|------------------------------------------------------------------------------|----|----|----|----|----|-----|
| pfam00664 | ABC_membrane, ABC transporter transmembrane region                           | 2  | 2  | 2  | 2  | 2  |     |
| pfam00665 | rve, Integrase core domain                                                   | 29 | 34 | 28 | 29 | 30 | yes |
| pfam00673 | Ribosomal_L5_C, ribosomal L5P family C-terminus                              | 1  | 1  | 1  | 1  | 1  |     |
| pfam00676 | E1_dh, Dehydrogenase E1 component                                            | 2  | 2  | 2  | 2  | 2  |     |
| pfam00679 | EFG_C, Elongation factor G C-terminus                                        | 3  | 3  | 3  | 3  | 3  |     |
| pfam00684 | DnaJ_CXXCXGXG, DnaJ central domain                                           | 1  | 1  | 1  | 1  | 1  |     |
| pfam00687 | Ribosomal_L1, Ribosomal protein L1p/L10e family                              | 1  | 1  | 1  | 1  | 1  |     |
| pfam00689 | Cation_ATPase_C, Cation transporting ATPase, C-terminus                      | 4  | 2  | 4  | 4  | 2  | yes |
| pfam00690 | Cation_ATPase_N, Cation transporter/ATPase, N-terminus                       | 4  | 4  | 4  | 4  | 3  | yes |
| pfam00696 | AA_kinase, Amino acid kinase family                                          | 4  | 4  | 4  | 4  | 3  | yes |
| pfam00701 | DHDPS, Dihydrodipicolinate synthetase family                                 | 1  | 1  | 1  | 1  | 1  |     |
| pfam00702 | Hydrolase, haloacid dehalogenase-like hydrolase                              | 5  | 5  | 5  | 5  | 4  | yes |
| pfam00707 | IF3_C, Translation initiation factor IF-3, C-terminal domain                 | 1  | 1  | 1  | 1  | 1  |     |
| pfam00709 | Adenylsucc_synt, Adenylosuccinate synthetase                                 | 1  | 1  | 1  | 1  | 1  |     |
| pfam00712 | DNA_pol3_beta, DNA polymerase III beta subunit, N-terminal domain            | 1  | 1  | 1  | 1  | 1  |     |
| pfam00719 | Pyrophosphatase, Inorganic pyrophosphatase                                   | 1  | 1  | 1  | 1  | 1  |     |
| pfam00724 | Oxidored_FMN, NADH:flavin oxidoreductase / NADH oxidase family               | 1  | 1  | 1  | 1  | 1  |     |
| pfam00749 | tRNA-synt_1c, tRNA synthetases class I (E and Q), catalytic domain           | 1  | 1  | 1  | 1  | 1  |     |
| pfam00750 | tRNA-synt_1d, tRNA synthetases class I (R)                                   | 1  | 1  | 1  | 1  | 1  |     |
| pfam00753 | Lactamase_B, Metallo-beta-lactamase superfamily                              | 3  | 3  | 3  | 3  | 3  |     |
| pfam00763 | THF_DHG_CYH, Tetrahydrofolate dehydrogenase/cyclohydrolase, catalytic domain | 1  | 1  | 1  | 1  | 1  |     |
| pfam00772 | DnaB, DnaB-like helicase N terminal domain                                   | 1  | 1  | 1  | 1  | 1  |     |
| pfam00773 | RNB, RNB domain                                                              | 1  | 1  | 1  | 1  | 1  |     |
| pfam00814 | Peptidase_M22, Glycoprotease family                                          | 2  | 3  | 2  | 2  | 2  | yes |
| pfam00817 | IMS, impB/mucB/samB family                                                   | 1  | 1  | 1  | 1  | 1  |     |
| pfam00825 | Ribonuclease_P, Ribonuclease P                                               | 1  | 1  | 2  | 1  | 1  | yes |

|           |                                                                |   |   |   |   |   |
|-----------|----------------------------------------------------------------|---|---|---|---|---|
| pfam00828 | Ribosomal_L18e, Ribosomal protein L18e/L15                     | 1 | 1 | 1 | 1 | 1 |
| pfam00829 | Ribosomal_L21p, Ribosomal prokaryotic L21 protein              | 1 | 1 | 1 | 1 | 1 |
| pfam00830 | Ribosomal_L28, Ribosomal L28 family                            | 1 | 1 | 1 | 1 | 1 |
| pfam00831 | Ribosomal_L29, Ribosomal L29 protein                           | 1 | 1 | 1 | 1 | 1 |
| pfam00834 | Ribul_P_3_epim, Ribulose-phosphate 3 epimerase family          | 2 | 2 | 2 | 2 | 2 |
| pfam00849 | PseudoU_synth_2, RNA pseudouridylate synthase                  | 3 | 3 | 3 | 3 | 3 |
| pfam00857 | Isochorismatase, Isochorismatase family                        | 1 | 1 | 1 | 1 | 1 |
| pfam00861 | Ribosomal_L18p, Ribosomal L18p/L5e family                      | 1 | 1 | 1 | 1 | 1 |
| pfam00871 | Acetate_kinase, Acetokinase family                             | 1 | 1 | 1 | 1 | 1 |
| pfam00881 | Nitroreductase, Nitroreductase family                          | 1 | 1 | 1 | 1 | 1 |
| pfam00883 | Peptidase_M17, Cytosol aminopeptidase family, catalytic domain | 2 | 2 | 2 | 2 | 2 |
| pfam00886 | Ribosomal_S16, Ribosomal protein S16                           | 1 | 1 | 1 | 1 | 1 |
| pfam00889 | EF_TS, Elongation factor TS                                    | 1 | 1 | 1 | 1 | 1 |
| pfam00890 | FAD_binding_2, FAD binding domain                              | 3 | 3 | 3 | 3 | 3 |
| pfam00929 | RNase_T, Exonuclease                                           | 1 | 1 | 1 | 1 | 1 |
| pfam00977 | His_biosynth, Histidine biosynthesis protein                   | 2 | 2 | 2 | 2 | 2 |
| pfam00986 | DNA_gyraseB_C, DNA gyrase B subunit, carboxyl terminus         | 2 | 2 | 2 | 2 | 2 |
| pfam01000 | RNA_pol_A_bac, RNA polymerase Rpb3/RpoA insert domain          | 1 | 1 | 1 | 1 | 1 |
| pfam01016 | Ribosomal_L27, Ribosomal L27 protein                           | 1 | 1 | 1 | 1 | 1 |
| pfam01018 | GTP1_OBG, GTP1/OBG                                             | 1 | 1 | 1 | 1 | 1 |
| pfam01025 | GrpE, GrpE                                                     | 1 | 1 | 1 | 1 | 1 |
| pfam01026 | TatD_DNase, TatD related DNase                                 | 1 | 1 | 1 | 1 | 1 |
| pfam01029 | NusB, NusB family                                              | 2 | 2 | 2 | 2 | 2 |
| pfam01032 | FecCD, FecCD transport family                                  | 1 | 1 | 1 | 1 | 1 |
| pfam01042 | Ribonuc_L-PSP, Endoribonuclease L-PSP                          | 1 | 1 | 1 | 1 | 1 |
| pfam01043 | SecA_PP_bind, SecA preprotein cross-linking domain             | 1 | 1 | 1 | 1 | 1 |

|           |                                                                               |   |   |   |   |   |     |
|-----------|-------------------------------------------------------------------------------|---|---|---|---|---|-----|
| pfam01048 | PNP_UDP_1, Phosphorylase superfamily                                          | 2 | 2 | 2 | 2 | 2 |     |
| pfam01053 | Cys_Met_Meta_PP, Cys/Met metabolism PLP-dependent enzyme                      | 2 | 2 | 2 | 2 | 2 |     |
| pfam01055 | Glyco_hydro_31, Glycosyl hydrolases family 31                                 | 1 | 1 | 1 | 1 | 1 |     |
| pfam01061 | ABC2_membrane, ABC-2 type transporter                                         | 2 | 1 | 1 | 1 | 1 | yes |
| pfam01066 | CDP-OH_P_transf, CDP-alcohol phosphatidyltransferase                          | 1 | 1 | 1 | 1 | 1 |     |
| pfam01070 | FMN_dh, FMN-dependent dehydrogenase                                           | 1 | 1 | 1 | 1 | 1 |     |
| pfam01073 | 3Beta_HSD, 3-beta hydroxysteroid dehydrogenase/isomerase family               | 3 | 3 | 3 | 1 | 3 | yes |
| pfam01074 | Glyco_hydro_38, Glycosyl hydrolases family 38 N-terminal domain               | 1 | 1 | 1 | 1 | 1 |     |
| pfam01078 | Mg_chelatase, Magnesium chelatase, subunit ChII                               | 1 | 1 | 1 | 1 | 1 |     |
| pfam01084 | Ribosomal_S18, Ribosomal protein S18                                          | 1 | 1 | 1 | 1 | 1 |     |
| pfam01116 | F_bP_aldolase, Fructose-bisphosphate aldolase class-II                        | 2 | 2 | 2 | 2 | 1 | yes |
| pfam01121 | CoaE, Dephospho-CoA kinase                                                    | 1 | 1 | 1 | 1 | 1 |     |
| pfam01131 | Topoisom_bac, DNA topoisomerase                                               | 1 | 1 | 1 | 1 | 1 |     |
| pfam01132 | EFP, Elongation factor P (EF-P) OB domain                                     | 1 | 1 | 1 | 1 | 1 |     |
| pfam01134 | GIDA, Glucose inhibited division protein A                                    | 5 | 5 | 4 | 5 | 5 | yes |
| pfam01148 | CTP_transf_1, Cytidylyltransferase family                                     | 1 | 1 | 1 | 1 | 1 |     |
| pfam01149 | Fapy_DNA_glyco, Formamidopyrimidine-DNA glycosylase N-terminal domain         | 1 | 1 | 1 | 1 | 1 |     |
| pfam01170 | UPF0020, Putative RNA methylase family UPF0020                                | 1 | 1 | 1 | 1 | 1 |     |
| pfam01171 | ATP_bind_3, PP-loop family                                                    | 1 | 1 | 1 | 1 | 1 |     |
| pfam01176 | eIF-1a, Translation initiation factor 1A / IF-1                               | 1 | 1 | 1 | 1 | 1 |     |
| pfam01180 | DHO_dh, Dihydroorotate dehydrogenase                                          | 1 | 1 | 1 | 1 | 1 |     |
| pfam01182 | Glucosamine_iso, Glucosamine-6-phosphate isomerases/6-phosphogluconolactonase | 2 | 2 | 2 | 2 | 2 |     |
| pfam01189 | Nol1_Nop2_Fmu, NOL1/NOP2/sun family                                           | 1 | 1 | 1 | 1 | 1 |     |
| pfam01193 | RNA_pol_L, RNA polymerase Rpb3/Rpb11 dimerisation domain                      | 1 | 1 | 1 | 1 | 1 |     |
| pfam01195 | Pept_tRNA_hydro, Peptidyl-tRNA hydrolase                                      | 1 | 1 | 1 | 1 | 1 |     |
| pfam01196 | Ribosomal_L17, Ribosomal protein L17                                          | 1 | 1 | 1 | 1 | 1 |     |



|           |                                                                             |   |   |   |   |   |     |
|-----------|-----------------------------------------------------------------------------|---|---|---|---|---|-----|
| pfam01197 | Ribosomal_L31, Ribosomal protein L31                                        | 1 | 1 | 1 | 1 | 1 |     |
| pfam01205 | UPF0029, Uncharacterized protein family UPF0029                             | 1 | 1 | 1 | 1 | 1 |     |
| pfam01207 | Dus, Dihydrouridine synthase (Dus)                                          | 2 | 2 | 2 | 2 | 2 |     |
| pfam01210 | NAD_Gly3P_dh_N, NAD-dependent glycerol-3-phosphate dehydrogenase N-terminus | 2 | 2 | 2 | 2 | 2 |     |
| pfam01212 | Beta_elim_lyase, Beta-eliminating lyase                                     | 1 | 1 | 1 | 1 | 1 |     |
| pfam01230 | HIT, HIT domain                                                             | 1 | 1 | 1 | 1 | 1 |     |
| pfam01232 | Mannitol_dh, Mannitol dehydrogenase Rossmann domain                         | 1 | 1 | 1 | 1 | 1 |     |
| pfam01238 | PMI_typeI, Phosphomannose isomerase type I                                  | 1 | 1 | 1 | 1 | 1 |     |
| pfam01245 | Ribosomal_L19, Ribosomal protein L19                                        | 1 | 1 | 1 | 1 | 1 |     |
| pfam01250 | Ribosomal_S6, Ribosomal protein S6                                          | 1 | 1 | 1 | 1 | 1 |     |
| pfam01252 | Peptidase_A8, Signal peptidase (SPase) II                                   | 1 | 1 | 1 | 1 | 1 |     |
| pfam01261 | AP_endonuc_2, Xylose isomerase-like TIM barrel                              | 1 | 1 | 1 | 1 | 1 |     |
| pfam01262 | AlaDh_PNT_C, Alanine dehydrogenase/PNT, C-terminal domain                   | 2 | 2 | 2 | 2 | 2 |     |
| pfam01266 | DAO, FAD dependent oxidoreductase                                           | 3 | 3 | 2 | 3 | 3 | yes |
| pfam01272 | GreA_GreB, Transcription elongation factor, GreA/GreB, C-term               | 1 | 1 | 1 | 1 | 1 |     |
| pfam01281 | Ribosomal_L9_N, Ribosomal protein L9, N-terminal domain                     | 1 | 1 | 1 | 1 | 1 |     |
| pfam01300 | Sua5_yciO_yrdC, Telomere recombination                                      | 1 | 1 | 1 | 1 | 1 |     |
| pfam01321 | Creatinase_N, Creatinase/Prolidase N-terminal domain                        | 1 | 1 | 1 | 1 | 1 |     |
| pfam01327 | Pep_deformylase, Polypeptide deformylase                                    | 1 | 1 | 1 | 1 | 1 |     |
| pfam01336 | tRNA_anti, OB-fold nucleic acid binding domain                              | 5 | 5 | 5 | 5 | 5 |     |
| pfam01351 | RNase_HII, Ribonuclease HII                                                 | 1 | 1 | 1 | 1 | 1 |     |
| pfam01367 | 5_3_exonuc, 5'-3' exonuclease, C-terminal SAM fold                          | 2 | 2 | 2 | 2 | 2 |     |
| pfam01368 | DHH, DHH family                                                             | 1 | 1 | 1 | 1 | 1 |     |
| pfam01370 | Epimerase, NAD dependent epimerase/dehydratase family                       | 5 | 5 | 5 | 3 | 5 | yes |
| pfam01380 | SIS, SIS domain                                                             | 4 | 4 | 3 | 4 | 4 | yes |
| pfam01396 | zf-C4_Topoiso, Topoisomerase DNA binding C4 zinc finger                     | 1 | 1 | 1 | 1 | 1 |     |

|           |                                                                  |   |   |   |   |   |     |
|-----------|------------------------------------------------------------------|---|---|---|---|---|-----|
| pfam01406 | tRNA-synt_1e, tRNA synthetases class I (C) catalytic domain      | 2 | 2 | 2 | 2 | 2 |     |
| pfam01409 | tRNA-synt_2d, tRNA synthetases class II core domain (F)          | 1 | 1 | 1 | 1 | 1 |     |
| pfam01411 | tRNA-synt_2c, tRNA synthetases class II (A)                      | 1 | 1 | 1 | 1 | 1 |     |
| pfam01416 | PseudoU_synth_1, tRNA pseudouridine synthase                     | 1 | 1 | 1 | 1 | 1 |     |
| pfam01418 | HTH_6, Helix-turn-helix domain, rpiR family                      | 3 | 3 | 3 | 3 | 3 |     |
| pfam01425 | Amidase, Amidase                                                 | 1 | 1 | 1 | 1 | 1 |     |
| pfam01430 | HSP33, Hsp33 protein                                             | 1 | 1 | 1 | 1 | 1 |     |
| pfam01431 | Peptidase_M13, Peptidase family M13                              | 2 | 2 | 2 | 2 | 2 |     |
| pfam01432 | Peptidase_M3, Peptidase family M3                                | 1 | 1 | 1 | 1 | 1 |     |
| pfam01434 | Peptidase_M41, Peptidase family M41                              | 1 | 1 | 1 | 1 | 1 |     |
| pfam01443 | Viral_helicase1, Viral (Superfamily 1) RNA helicase              | 2 | 2 | 2 | 2 | 1 | yes |
| pfam01467 | CTP_transf_2, Cytidylyltransferase                               | 2 | 2 | 2 | 2 | 2 |     |
| pfam01475 | FUR, Ferric uptake regulator family                              | 1 | 1 | 1 | 1 | 1 |     |
| pfam01479 | S4, S4 domain                                                    | 5 | 5 | 5 | 5 | 5 |     |
| pfam01494 | FAD_binding_3, FAD binding domain                                | 1 | 1 | 0 | 1 | 1 | yes |
| pfam01496 | V_ATPase_I, V-type ATPase 116kDa subunit family                  | 1 | 1 | 1 | 0 | 1 | yes |
| pfam01509 | TruB_N, TruB family pseudouridylate synthase (N terminal domain) | 1 | 1 | 1 | 1 | 1 |     |
| pfam01513 | NAD_kinase, ATP-NAD kinase                                       | 1 | 1 | 1 | 1 | 1 |     |
| pfam01515 | PTA_PTB, Phosphate acetyl/butaryl transferase                    | 1 | 1 | 1 | 1 | 1 |     |
| pfam01541 | GIY-YIG, GIY-YIG catalytic domain                                | 1 | 1 | 1 | 1 | 1 |     |
| pfam01546 | Peptidase_M20, Peptidase family M20/M25/M40                      | 1 | 1 | 1 | 1 | 1 |     |
| pfam01553 | Acytransferase, Acyltransferase                                  | 1 | 1 | 1 | 1 | 1 |     |
| pfam01555 | N6_N4_Mtase, DNA methylase                                       | 2 | 2 | 2 | 2 | 2 |     |
| pfam01556 | DnaJ_C, DnaJ C terminal domain                                   | 1 | 1 | 1 | 1 | 1 |     |
| pfam01569 | PAP2, PAP2 superfamily                                           | 1 | 1 | 1 | 1 | 1 |     |
| pfam01576 | Myosin_tail_1, Myosin tail                                       | 1 | 1 | 0 | 1 | 1 | yes |

|           |                                                              |    |    |    |    |    |     |
|-----------|--------------------------------------------------------------|----|----|----|----|----|-----|
| pfam01588 | tRNA_bind, Putative tRNA binding domain                      | 2  | 2  | 2  | 2  | 2  |     |
| pfam01592 | NifU_N, NifU-like N terminal domain                          | 1  | 1  | 1  | 1  | 1  |     |
| pfam01593 | Amino_oxidase, Flavin containing amine oxidoreductase        | 3  | 2  | 3  | 1  | 3  | yes |
| pfam01597 | GCV_H, Glycine cleavage H-protein                            | 1  | 1  | 0  | 1  | 1  | yes |
| pfam01609 | DDE_Tnp_1, Transposase DDE domain                            | 47 | 51 | 50 | 41 | 60 | yes |
| pfam01625 | PMSR, Peptide methionine sulfoxide reductase                 | 1  | 1  | 1  | 1  | 1  |     |
| pfam01628 | HrcA, HrcA protein C terminal domain                         | 1  | 1  | 1  | 1  | 1  |     |
| pfam01632 | Ribosomal_L35p, Ribosomal protein L35                        | 1  | 1  | 1  | 1  | 1  |     |
| pfam01633 | Choline_kinase, Choline/ethanolamine kinase                  | 1  | 1  | 1  | 1  | 1  |     |
| pfam01636 | APH, Phosphotransferase enzyme family                        | 1  | 1  | 1  | 1  | 1  |     |
| pfam01641 | SelR, SelR domain                                            | 1  | 1  | 1  | 1  | 1  |     |
| pfam01648 | ACPS, 4'-phosphopantetheinyl transferase superfamily         | 1  | 1  | 1  | 1  | 1  |     |
| pfam01649 | Ribosomal_S20p, Ribosomal protein S20                        | 1  | 1  | 1  | 1  | 1  |     |
| pfam01653 | DNA_ligase_aden, NAD-dependent DNA ligase adenylation domain | 1  | 1  | 1  | 1  | 1  |     |
| pfam01656 | CbiA, CobQ/CobB/MinD/ParA nucleotide binding domain          | 2  | 2  | 2  | 2  | 2  |     |
| pfam01668 | SmpB, SmpB protein                                           | 1  | 1  | 1  | 1  | 1  |     |
| pfam01676 | Metalloenzyme, Metalloenzyme superfamily                     | 1  | 1  | 1  | 1  | 1  |     |
| pfam01687 | Flavokinase, Riboflavin kinase                               | 1  | 1  | 1  | 1  | 1  |     |
| pfam01693 | Cauli_VI, Caulimovirus viroplasmin                           | 1  | 1  | 1  | 1  | 1  |     |
| pfam01695 | IstB_IS21, IstB-like ATP binding protein                     | 1  | 1  | 1  | 1  | 1  |     |
| pfam01709 | Transcrip_reg, Transcriptional regulator                     | 1  | 1  | 1  | 1  | 1  |     |
| pfam01712 | dNK, Deoxynucleoside kinase                                  | 2  | 2  | 2  | 2  | 2  |     |
| pfam01725 | Ham1p_like, Ham1 family                                      | 1  | 1  | 1  | 1  | 1  |     |
| pfam01728 | FtsJ, FtsJ-like methyltransferase                            | 1  | 1  | 1  | 1  | 1  |     |
| pfam01732 | DUF31, Putative peptidase (DUF31)                            | 7  | 7  | 7  | 7  | 3  | yes |
| pfam01746 | tRNA_m1G_MT, tRNA (Guanine-1)-methyltransferase              | 1  | 1  | 1  | 1  | 1  |     |

|           |                                                                      |   |   |   |   |   |     |
|-----------|----------------------------------------------------------------------|---|---|---|---|---|-----|
| pfam01751 | Toprim, Toprim domain                                                | 5 | 5 | 5 | 5 | 5 |     |
| pfam01765 | RRF, Ribosome recycling factor                                       | 1 | 1 | 1 | 1 | 1 |     |
| pfam01769 | MgtE, Divalent cation transporter                                    | 1 | 1 | 0 | 0 | 1 | yes |
| pfam01782 | RimM, RimM N-terminal domain                                         | 1 | 1 | 1 | 1 | 1 |     |
| pfam01783 | Ribosomal_L32p, Ribosomal L32p protein family                        | 1 | 1 | 1 | 1 | 1 |     |
| pfam01784 | NIF3, NIF3 (NGG1p interacting factor 3)                              | 1 | 1 | 1 | 1 | 1 |     |
| pfam01790 | LGT, Prolipoprotein diacylglyceryl transferase                       | 2 | 2 | 2 | 2 | 2 |     |
| pfam01791 | DeoC, DeoC/LacD family aldolase                                      | 1 | 1 | 1 | 1 | 1 |     |
| pfam01795 | Methyltransf_5, MraW methylase family                                | 1 | 1 | 1 | 1 | 1 |     |
| pfam01807 | zf-CHC2, CHC2 zinc finger                                            | 1 | 1 | 1 | 1 | 1 |     |
| pfam01812 | 5-FTHF_cyc-lig, 5-formyltetrahydrofolate cyclo-ligase family         | 1 | 1 | 1 | 1 | 1 |     |
| pfam01841 | Transglut_core, Transglutaminase-like superfamily                    | 2 | 2 | 2 | 2 | 2 |     |
| pfam01863 | DUF45, Protein of unknown function DUF45                             | 1 | 1 | 1 | 1 | 1 |     |
| pfam01895 | PhoU, PhoU domain                                                    | 1 | 1 | 1 | 1 | 1 |     |
| pfam01926 | MMR_HSR1, 50S ribosome-binding GTPase                                | 9 | 9 | 7 | 9 | 9 | yes |
| pfam01946 | Thi4, Thi4 family                                                    | 1 | 1 | 1 | 1 | 1 |     |
| pfam01965 | DJ-1_PfpI, DJ-1/PfpI family                                          | 1 | 1 | 1 | 1 | 1 |     |
| pfam01966 | HD, HD domain                                                        | 5 | 5 | 4 | 5 | 5 | yes |
| pfam01979 | Amidohydro_1, Amidohydrolase family                                  | 1 | 1 | 1 | 1 | 1 |     |
| pfam02030 | Lipoprotein_8, Hypothetical lipoprotein (MG045 family)               | 1 | 1 | 1 | 1 | 1 |     |
| pfam02033 | RBFA, Ribosome-binding factor A                                      | 1 | 1 | 1 | 1 | 1 |     |
| pfam02080 | TrkA_C, TrkA-C domain                                                | 1 | 1 | 1 | 1 | 1 |     |
| pfam02086 | MethyltransfD12, D12 class N6 adenine-specific DNA methyltransferase | 1 | 1 | 1 | 1 | 1 |     |
| pfam02096 | 60KD_IMP, 60Kd inner membrane protein                                | 1 | 1 | 1 | 1 | 1 |     |
| pfam02130 | UPF0054, Uncharacterized protein family UPF0054                      | 1 | 1 | 1 | 1 | 1 |     |
| pfam02132 | RecR, RecR protein                                                   | 1 | 1 | 1 | 1 | 1 |     |

|           |                                                                    |    |    |    |    |    |     |
|-----------|--------------------------------------------------------------------|----|----|----|----|----|-----|
| pfam02151 | UVR, UvrB/uvrC motif                                               | 1  | 1  | 1  | 1  | 1  |     |
| pfam02190 | LON, ATP-dependent protease La (LON) domain                        | 1  | 1  | 1  | 1  | 1  |     |
| pfam02223 | Thymidylate_kin, Thymidylate kinase                                | 2  | 2  | 2  | 2  | 2  |     |
| pfam02224 | Cytidylate_kin, Cytidylate kinase                                  | 1  | 1  | 1  | 1  | 1  |     |
| pfam02254 | TrkA_N, TrkA-N domain                                              | 1  | 1  | 1  | 1  | 1  |     |
| pfam02272 | DHHA1, DHHA1 domain                                                | 1  | 1  | 1  | 1  | 1  |     |
| pfam02302 | PTS_IIB, PTS system, Lactose/Cellobiose specific IIB subunit       | 4  | 4  | 4  | 4  | 4  |     |
| pfam02355 | SecD_SecF, Protein export membrane protein                         | 1  | 1  | 2  | 1  | 2  | yes |
| pfam02357 | NusG, Transcription termination factor nusG                        | 1  | 1  | 1  | 1  | 1  |     |
| pfam02361 | CbiQ, Cobalt transport protein                                     | 1  | 1  | 1  | 1  | 1  |     |
| pfam02367 | UPF0079, Uncharacterized P-loop hydrolase UPF0079                  | 0  | 1  | 1  | 1  | 1  |     |
| pfam02378 | PTS_EIIC, Phosphotransferase system, EIIC                          | 12 | 12 | 13 | 12 | 11 | yes |
| pfam02381 | MraZ, MraZ protein                                                 | 1  | 1  | 1  | 1  | 1  |     |
| pfam02386 | TrkH, Cation transport protein                                     | 1  | 1  | 1  | 1  | 1  |     |
| pfam02390 | Methyltransf_4, Putative methyltransferase                         | 1  | 1  | 1  | 1  | 1  |     |
| pfam02403 | Seryl_tRNA_N, Seryl-tRNA synthetase N-terminal domain              | 1  | 1  | 1  | 1  | 1  |     |
| pfam02417 | Chromate_transp, Chromate transporter                              | 2  | 2  | 2  | 2  | 2  |     |
| pfam02421 | FeoB_N, Ferrous iron transport protein B                           | 7  | 7  | 5  | 7  | 7  | yes |
| pfam02463 | SMC_N, RecF/RecN/SMC N terminal domain                             | 4  | 4  | 3  | 3  | 4  | yes |
| pfam02464 | CinA, Competence-damaged protein                                   | 1  | 1  | 1  | 1  | 1  |     |
| pfam02475 | Met_10, Met-10+ like-protein                                       | 1  | 1  | 1  | 1  | 1  |     |
| pfam02502 | LacAB_rpiB, Ribose/Galactose Isomerase                             | 1  | 1  | 1  | 1  | 1  |     |
| pfam02504 | FA_synthesis, Fatty acid synthesis protein                         | 1  | 1  | 1  | 1  | 1  |     |
| pfam02517 | Abi, CAAX protease self-immunity                                   | 1  | 1  | 1  | 1  | 1  |     |
| pfam02518 | HATPase_c, Histidine kinase-, DNA gyrase B-, and HSP90-like ATPase | 2  | 2  | 2  | 2  | 2  |     |
| pfam02525 | Flavodoxin_2, Flavodoxin-like fold                                 | 1  | 1  | 1  | 1  | 1  |     |

|           |                                                                                |   |   |   |   |   |     |
|-----------|--------------------------------------------------------------------------------|---|---|---|---|---|-----|
| pfam02527 | GidB, rRNA small subunit methyltransferase G                                   | 2 | 2 | 2 | 2 | 2 |     |
| pfam02540 | NAD_synthase, NAD synthase                                                     | 2 | 2 | 2 | 2 | 2 |     |
| pfam02565 | RecO_C, Recombination protein O C terminal                                     | 1 | 1 | 1 | 1 | 1 |     |
| pfam02568 | ThiI, Thiamine biosynthesis protein (ThiI)                                     | 2 | 2 | 2 | 2 | 2 |     |
| pfam02576 | DUF150, Uncharacterized BCR, YhbC family COG0779                               | 1 | 1 | 1 | 1 | 1 |     |
| pfam02581 | TMP-TENI, Thiamine monophosphate synthase/TENI                                 | 1 | 1 | 1 | 1 | 1 |     |
| pfam02588 | DUF161, Uncharacterized BCR, YitT family COG1284                               | 1 | 1 | 1 | 1 | 1 |     |
| pfam02590 | SPOUT_MTase, Predicted SPOUT methyltransferase                                 | 1 | 1 | 0 | 1 | 1 | yes |
| pfam02601 | Exonuc_VII_L, Exonuclease VII, large subunit                                   | 1 | 1 | 1 | 1 | 1 |     |
| pfam02603 | Hpr_kinase_N, HPr Serine kinase N terminus                                     | 1 | 1 | 1 | 1 | 1 |     |
| pfam02608 | Bmp, Basic membrane protein                                                    | 1 | 1 | 1 | 1 | 1 |     |
| pfam02609 | Exonuc_VII_S, Exonuclease VII small subunit                                    | 1 | 1 | 1 | 1 | 1 |     |
| pfam02616 | ScpA_ScpB, ScpA/B protein                                                      | 1 | 1 | 1 | 1 | 1 |     |
| pfam02620 | DUF177, Uncharacterized ACR, COG1399                                           | 1 | 1 | 1 | 1 | 1 |     |
| pfam02637 | GatB_Yqey, GatB domain                                                         | 1 | 1 | 1 | 1 | 1 |     |
| pfam02645 | DegV, Uncharacterized protein, DegV family COG1307                             | 2 | 2 | 2 | 2 | 2 |     |
| pfam02646 | RmuC, RmuC family                                                              | 1 | 1 | 1 | 1 | 1 |     |
| pfam02650 | HTH_WhiA, Sporulation Regulator WhiA C terminal domain                         | 1 | 1 | 1 | 1 | 1 |     |
| pfam02653 | BPD_transp_2, Branched-chain amino acid transport system / permease component  | 2 | 2 | 2 | 2 | 2 |     |
| pfam02660 | G3P_acyltransf, Glycerol-3-phosphate acyltransferase                           | 1 | 1 | 1 | 1 | 1 |     |
| pfam02661 | Fic, Fic/DOC family                                                            | 4 | 4 | 3 | 4 | 2 | yes |
| pfam02686 | Glu-tRNAGln, Glu-tRNAGln amidotransferase C subunit                            | 1 | 1 | 1 | 1 | 1 |     |
| pfam02687 | FtsX, FtsX-like permease family                                                | 5 | 5 | 7 | 5 | 5 | yes |
| pfam02719 | Polysacc_synt_2, Polysaccharide biosynthesis protein                           | 3 | 3 | 3 | 1 | 3 | yes |
| pfam02729 | OTCace_N, Aspartate/ornithine carbamoyltransferase, carbamoyl-P binding domain | 1 | 1 | 1 | 1 | 1 |     |
| pfam02733 | Dak1, Dak1 domain                                                              | 1 | 1 | 1 | 1 | 1 |     |

|           |                                                                                     |   |   |   |   |   |
|-----------|-------------------------------------------------------------------------------------|---|---|---|---|---|
| pfam02734 | Dak2, DAK2 domain                                                                   | 2 | 2 | 2 | 2 | 2 |
| pfam02739 | 5_3_exonuc_N, 5'-3' exonuclease, N-terminal resolvase-like domain                   | 2 | 2 | 2 | 2 | 2 |
| pfam02767 | DNA_pol3_beta_2, DNA polymerase III beta subunit, central domain                    | 1 | 1 | 1 | 1 | 1 |
| pfam02768 | DNA_pol3_beta_3, DNA polymerase III beta subunit, C-terminal domain                 | 1 | 1 | 1 | 1 | 1 |
| pfam02772 | S-AdoMet_synt_M, S-adenosylmethionine synthetase, central domain                    | 1 | 1 | 1 | 1 | 1 |
| pfam02773 | S-AdoMet_synt_C, S-adenosylmethionine synthetase, C-terminal domain                 | 1 | 1 | 1 | 1 | 1 |
| pfam02779 | Transket_pyr, Transketolase, pyrimidine binding domain                              | 2 | 2 | 2 | 2 | 2 |
| pfam02780 | Transketolase_C, Transketolase, C-terminal domain                                   | 2 | 2 | 2 | 2 | 2 |
| pfam02782 | FGGY_C, FGGY family of carbohydrate kinases, C-terminal domain                      | 1 | 1 | 1 | 1 | 1 |
| pfam02800 | Gp_dh_C, Glyceraldehyde 3-phosphate dehydrogenase, C-terminal domain                | 1 | 1 | 1 | 1 | 1 |
| pfam02811 | PHP, PHP domain                                                                     | 1 | 1 | 1 | 1 | 1 |
| pfam02817 | E3_binding, e3 binding domain                                                       | 2 | 2 | 2 | 2 | 2 |
| pfam02823 | ATP-synt_DE_N, ATP synthase, Delta/Epsilon chain, beta-sandwich domain              | 1 | 1 | 1 | 1 | 1 |
| pfam02824 | TGS, TGS domain                                                                     | 2 | 2 | 2 | 2 | 2 |
| pfam02826 | 2-Hacid_dh_C, D-isomer specific 2-hydroxyacid dehydrogenase, NAD binding domain     | 1 | 1 | 1 | 1 | 1 |
| pfam02852 | Pyr_redox_dim, Pyridine nucleotide-disulphide oxidoreductase, dimerisation domain   | 4 | 4 | 4 | 4 | 4 |
| pfam02866 | Ldh_1_C, lactate/malate dehydrogenase, alpha/beta C-terminal domain                 | 1 | 1 | 1 | 1 | 1 |
| pfam02867 | Ribonuc_red_lgC, Ribonucleotide reductase, barrel domain                            | 1 | 1 | 2 | 1 | 1 |
| pfam02874 | ATP-synt_ab_N, ATP synthase alpha/beta family, beta-barrel domain                   | 2 | 2 | 2 | 2 | 2 |
| pfam02878 | PGM_PMM_I, Phosphoglucomutase/phosphomannomutase, alpha/beta/alpha domain I         | 1 | 1 | 1 | 1 | 1 |
| pfam02879 | PGM_PMM_II, Phosphoglucomutase/phosphomannomutase, alpha/beta/alpha domain II       | 1 | 1 | 1 | 1 | 1 |
| pfam02880 | PGM_PMM_III, Phosphoglucomutase/phosphomannomutase, alpha/beta/alpha domain III     | 1 | 1 | 1 | 1 | 1 |
| pfam02881 | SRP54_N, SRP54-type protein, helical bundle domain                                  | 2 | 2 | 2 | 2 | 2 |
| pfam02882 | THF_DHG_CYH_C, Tetrahydrofolate dehydrogenase/cyclohydrolase, NAD(P)-binding domain | 2 | 2 | 2 | 2 | 2 |
| pfam02885 | Glycos_trans_3N, Glycosyl transferase family, helical bundle domain                 | 1 | 1 | 1 | 1 | 1 |
| pfam02887 | PK_C, Pyruvate kinase, alpha/beta domain                                            | 1 | 1 | 1 | 1 | 1 |

yes

|           |                                                                        |   |   |   |   |   |     |
|-----------|------------------------------------------------------------------------|---|---|---|---|---|-----|
| pfam02896 | PEP-utilizers_C, PEP-utilising enzyme, TIM barrel domain               | 1 | 1 | 1 | 1 | 1 |     |
| pfam02911 | Formyl_trans_C, Formyl transferase, C-terminal domain                  | 1 | 1 | 1 | 1 | 1 |     |
| pfam02912 | Phe_tRNA-synt_N, Aminoacyl tRNA synthetase class II, N-terminal domain | 1 | 1 | 0 | 1 | 1 | yes |
| pfam02926 | THUMP, THUMP domain                                                    | 1 | 1 | 1 | 1 | 1 |     |
| pfam02934 | GatB_N, GatB/GatE catalytic domain                                     | 1 | 1 | 1 | 1 | 1 |     |
| pfam02938 | GAD, GAD domain                                                        | 2 | 2 | 2 | 1 | 2 | yes |
| pfam02948 | Amelogenin, Amelogenin                                                 | 1 | 1 | 1 | 1 | 1 |     |
| pfam02956 | TT_ORF1, TT viral orf 1                                                | 1 | 1 | 0 | 0 | 1 | yes |
| pfam02978 | SRP_SPB, Signal peptide binding domain                                 | 1 | 1 | 1 | 1 | 1 |     |
| pfam02993 | MCPVI, Minor capsid protein VI                                         | 0 | 0 | 1 | 0 | 0 | yes |
| pfam02994 | Transposase_22, L1 transposable element                                | 1 | 1 | 0 | 0 | 1 | yes |
| pfam03009 | GDPD, Glycerophosphoryl diester phosphodiesterase family               | 1 | 1 | 1 | 1 | 1 |     |
| pfam03030 | H_PPase, Inorganic H+ pyrophosphatase                                  | 1 | 1 | 1 | 1 | 1 |     |
| pfam03054 | tRNA_Me_trans, tRNA methyl transferase                                 | 1 | 1 | 1 | 1 | 1 |     |
| pfam03060 | NMO, Nitronate monooxygenase                                           | 1 | 1 | 1 | 1 | 1 |     |
| pfam03099 | BPL_LplA_LipB, Biotin/lipoate A/B protein ligase family                | 2 | 2 | 2 | 2 | 2 |     |
| pfam03118 | RNA_pol_A_CTD, Bacterial RNA polymerase, alpha chain C terminal domain | 1 | 1 | 1 | 1 | 1 |     |
| pfam03119 | DNA_ligase_ZBD, NAD-dependent DNA ligase C4 zinc finger domain         | 1 | 1 | 0 | 1 | 1 | yes |
| pfam03120 | DNA_ligase_OB, NAD-dependent DNA ligase OB-fold domain                 | 1 | 1 | 1 | 1 | 1 |     |
| pfam03129 | HGTP_anticodon, Anticodon binding domain                               | 3 | 3 | 3 | 3 | 3 |     |
| pfam03143 | GTP_EFTU_D3, Elongation factor Tu C-terminal domain                    | 1 | 1 | 1 | 1 | 1 |     |
| pfam03144 | GTP_EFTU_D2, Elongation factor Tu domain 2                             | 4 | 4 | 4 | 4 | 4 |     |
| pfam03147 | FDX-ACB, Ferredoxin-fold anticodon binding domain                      | 1 | 1 | 0 | 1 | 1 | yes |
| pfam03148 | Tektin, Tektin family                                                  | 1 | 1 | 1 | 0 | 1 | yes |
| pfam03154 | Atrophin-1, Atrophin-1 family                                          | 1 | 1 | 1 | 1 | 1 |     |
| pfam03167 | UDG, Uracil DNA glycosylase superfamily                                | 1 | 1 | 1 | 1 | 1 |     |



|           |                                                            |    |    |    |    |    |     |
|-----------|------------------------------------------------------------|----|----|----|----|----|-----|
| pfam03193 | DUF258, Protein of unknown function, DUF258                | 6  | 7  | 5  | 7  | 7  | yes |
| pfam03235 | DUF262, Protein of unknown function DUF262                 | 1  | 1  | 1  | 1  | 1  |     |
| pfam03266 | NTPase_1, NTPase                                           | 1  | 1  | 1  | 1  | 1  |     |
| pfam03275 | GLF, UDP-galactopyranose mutase                            | 3  | 3  | 3  | 1  | 3  | yes |
| pfam03328 | HpcH_HpaI, HpcH/HpaI aldolase/citrate lyase family         | 1  | 1  | 1  | 1  | 1  |     |
| pfam03358 | FMN_red, NADPH-dependent FMN reductase                     | 1  | 1  | 1  | 1  | 1  |     |
| pfam03382 | DUF285, Mycoplasma protein of unknown function, DUF285     | 29 | 31 | 29 | 30 | 28 | yes |
| pfam03408 | Foamy_virus_ENV, Foamy virus envelope protein              | 1  | 1  | 1  | 1  | 1  |     |
| pfam03412 | Peptidase_C39, Peptidase C39 family                        | 1  | 1  | 1  | 1  | 1  |     |
| pfam03448 | MgtE_N, MgtE intracellular N domain                        | 1  | 1  | 0  | 1  | 1  | yes |
| pfam03449 | GreA_GreB_N, Transcription elongation factor, N-terminal   | 1  | 1  | 1  | 1  | 1  |     |
| pfam03462 | PCRF, PCRF domain                                          | 1  | 1  | 1  | 1  | 1  |     |
| pfam03484 | B5, tRNA synthetase B5 domain                              | 1  | 1  | 1  | 1  | 1  |     |
| pfam03485 | Arg_tRNA_synt_N, Arginyl tRNA synthetase N terminal domain | 1  | 1  | 1  | 1  | 1  |     |
| pfam03486 | HI0933_like, HI0933-like protein                           | 2  | 2  | 1  | 2  | 2  | yes |
| pfam03547 | Mem_trans, Membrane transport protein                      | 1  | 1  | 1  | 1  | 1  |     |
| pfam03572 | Peptidase_S41, Peptidase family S41                        | 3  | 3  | 3  | 3  | 3  |     |
| pfam03590 | AsnA, Aspartate-ammonia ligase                             | 1  | 1  | 1  | 1  | 1  |     |
| pfam03602 | Cons_hypoth95, Conserved hypothetical protein 95           | 2  | 2  | 2  | 2  | 2  |     |
| pfam03606 | DcuC, C4-dicarboxylate anaerobic carrier                   | 4  | 4  | 4  | 4  | 3  | yes |
| pfam03610 | EIIA-man, PTS system fructose IIA component                | 1  | 1  | 1  | 1  | 1  |     |
| pfam03611 | EIIC-GAT, PTS system sugar-specific permease component     | 1  | 1  | 1  | 1  | 1  |     |
| pfam03652 | UPF0081, Uncharacterized protein family (UPF0081)          | 1  | 1  | 1  | 1  | 1  |     |
| pfam03672 | UPF0154, Uncharacterized protein family (UPF0154)          | 1  | 1  | 1  | 1  | 1  |     |
| pfam03699 | UPF0182, Uncharacterized protein family (UPF0182)          | 1  | 1  | 1  | 1  | 1  |     |
| pfam03719 | Ribosomal_S5_C, Ribosomal protein S5, C-terminal domain    | 1  | 1  | 1  | 1  | 1  |     |

|           |                                                                      |   |   |   |   |   |     |
|-----------|----------------------------------------------------------------------|---|---|---|---|---|-----|
| pfam03764 | EFG_IV, Elongation factor G, domain IV                               | 1 | 1 | 1 | 1 | 1 |     |
| pfam03780 | Asp23, Asp23 family                                                  | 1 | 1 | 1 | 1 | 1 |     |
| pfam03796 | DnaB_C, DnaB-like helicase C terminal domain                         | 1 | 1 | 1 | 1 | 1 |     |
| pfam03838 | RecU, Recombination protein U                                        | 1 | 1 | 1 | 0 | 1 | yes |
| pfam03932 | CutC, CutC family                                                    | 1 | 1 | 1 | 1 | 1 |     |
| pfam03946 | Ribosomal_L11_N, Ribosomal protein L11, N-terminal domain            | 1 | 1 | 1 | 1 | 1 |     |
| pfam03947 | Ribosomal_L2_C, Ribosomal Proteins L2, C-terminal domain             | 1 | 1 | 1 | 1 | 1 |     |
| pfam03948 | Ribosomal_L9_C, Ribosomal protein L9, C-terminal domain              | 1 | 1 | 1 | 1 | 1 |     |
| pfam03952 | Enolase_N, Enolase, N-terminal domain                                | 1 | 1 | 1 | 1 | 1 |     |
| pfam03961 | DUF342, Protein of unknown function (DUF342)                         | 1 | 1 | 1 | 1 | 1 |     |
| pfam03989 | DNA_gyraseA_C, DNA gyrase C-terminal domain, beta-propeller          | 2 | 2 | 1 | 2 | 2 | yes |
| pfam04074 | DUF386, Domain of unknown function (DUF386)                          | 1 | 1 | 1 | 1 | 1 |     |
| pfam04079 | DUF387, Putative transcriptional regulators (Ypuh-like)              | 1 | 1 | 1 | 1 | 1 |     |
| pfam04131 | NanE, Putative N-acetylmannosamine-6-phosphate epimerase             | 1 | 1 | 1 | 1 | 1 |     |
| pfam04156 | IncA, IncA protein                                                   | 1 | 1 | 0 | 0 | 1 | yes |
| pfam04263 | TPK_catalytic, Thiamin pyrophosphokinase, catalytic domain           | 1 | 1 | 1 | 1 | 1 |     |
| pfam04265 | TPK_B1_binding, Thiamin pyrophosphokinase, vitamin B1 binding domain | 1 | 1 | 1 | 1 | 1 |     |
| pfam04296 | DUF448, Protein of unknown function (DUF448)                         | 1 | 1 | 1 | 1 | 1 |     |
| pfam04297 | UPF0122, Putative helix-turn-helix protein, YlxM / p13 like          | 1 | 1 | 1 | 1 | 1 |     |
| pfam04321 | RmlD_sub_bind, RmlD substrate binding domain                         | 3 | 3 | 3 | 1 | 3 | yes |
| pfam04326 | AAA_4, Divergent AAA domain                                          | 1 | 1 | 1 | 1 | 1 |     |
| pfam04327 | DUF464, Protein of unknown function (DUF464)                         | 1 | 1 | 1 | 1 | 1 |     |
| pfam04371 | PAD_porph, Porphyromonas-type peptidyl-arginine deiminase            | 1 | 1 | 1 | 1 | 1 |     |
| pfam04472 | DUF552, Protein of unknown function (DUF552)                         | 1 | 1 | 1 | 1 | 1 |     |
| pfam04539 | Sigma70_r3, Sigma-70 region 3                                        | 1 | 1 | 1 | 1 | 1 |     |
| pfam04542 | Sigma70_r2, Sigma-70 region 2                                        | 1 | 1 | 1 | 1 | 1 |     |

|           |                                                              |   |   |   |   |   |     |
|-----------|--------------------------------------------------------------|---|---|---|---|---|-----|
| pfam04545 | Sigma70_r4, Sigma-70, region 4                               | 1 | 1 | 1 | 1 | 1 |     |
| pfam04560 | RNA_pol_Rpb2_7, RNA polymerase Rpb2, domain 7                | 1 | 1 | 1 | 1 | 1 |     |
| pfam04561 | RNA_pol_Rpb2_2, RNA polymerase Rpb2, domain 2                | 1 | 1 | 1 | 1 | 1 |     |
| pfam04563 | RNA_pol_Rpb2_1, RNA polymerase beta subunit                  | 1 | 1 | 1 | 1 | 1 |     |
| pfam04565 | RNA_pol_Rpb2_3, RNA polymerase Rpb2, domain 3                | 1 | 1 | 1 | 1 | 1 |     |
| pfam04607 | RelA_SpoT, Region found in RelA / SpoT proteins              | 1 | 1 | 1 | 1 | 1 |     |
| pfam04652 | DUF605, Vta1 like                                            | 1 | 1 | 1 | 1 | 1 |     |
| pfam04693 | DDE_Tnp_2, Archaeal putative transposase ISC1217             | 1 | 2 | 0 | 0 | 0 | yes |
| pfam04760 | IF2_N, Translation initiation factor IF-2, N-terminal region | 1 | 1 | 1 | 1 | 1 |     |
| pfam04816 | DUF633, Family of unknown function (DUF633)                  | 1 | 1 | 2 | 1 | 1 | yes |
| pfam04851 | ResIII, Type III restriction enzyme, res subunit             | 1 | 1 | 1 | 1 | 1 |     |
| pfam04983 | RNA_pol_Rpb1_3, RNA polymerase Rpb1, domain 3                | 1 | 1 | 1 | 1 | 1 |     |
| pfam04997 | RNA_pol_Rpb1_1, RNA polymerase Rpb1, domain 1                | 1 | 1 | 1 | 1 | 1 |     |
| pfam04998 | RNA_pol_Rpb1_5, RNA polymerase Rpb1, domain 5                | 1 | 1 | 1 | 1 | 1 |     |
| pfam05000 | RNA_pol_Rpb1_4, RNA polymerase Rpb1, domain 4                | 1 | 1 | 1 | 1 | 1 |     |
| pfam05053 | Menin, Menin                                                 | 1 | 1 | 1 | 1 | 1 |     |
| pfam05057 | DUF676, Putative serine esterase (DUF676)                    | 1 | 1 | 1 | 1 | 1 |     |
| pfam05087 | Rota_VP2, Rotavirus VP2 protein                              | 1 | 1 | 1 | 0 | 1 | yes |
| pfam05103 | DivIVA, DivIVA protein                                       | 1 | 1 | 1 | 1 | 1 |     |
| pfam05104 | Rib_rec_KP_reg, Ribosome receptor lysine/proline rich region | 0 | 0 | 1 | 0 | 0 | yes |
| pfam05116 | S6PP, Sucrose-6F-phosphate phosphohydrolase                  | 3 | 3 | 3 | 3 | 2 | yes |
| pfam05175 | MTS, Methyltransferase small domain                          | 3 | 3 | 3 | 3 | 3 |     |
| pfam05191 | ADK_lid, Adenylate kinase, active site lid                   | 1 | 1 | 1 | 1 | 1 |     |
| pfam05198 | IF3_N, Translation initiation factor IF-3, N-terminal domain | 1 | 1 | 1 | 1 | 1 |     |
| pfam05222 | AlaDh_PNT_N, Alanine dehydrogenase/PNT, N-terminal domain    | 1 | 1 | 1 | 1 | 1 |     |
| pfam05297 | Herpes_LMP1, Herpesvirus latent membrane protein 1 (LMP1)    | 2 | 2 | 1 | 2 | 2 | yes |

|           |                                                                   |   |   |   |   |   |     |
|-----------|-------------------------------------------------------------------|---|---|---|---|---|-----|
| pfam05362 | Lon_C, Lon protease (S16) C-terminal proteolytic domain           | 1 | 1 | 1 | 1 | 1 |     |
| pfam05491 | RuvB_C, Holliday junction DNA helicase ruvB C-terminus            | 1 | 1 | 1 | 1 | 1 |     |
| pfam05496 | RuvB_N, Holliday junction DNA helicase ruvB N-terminus            | 2 | 2 | 2 | 2 | 2 |     |
| pfam05524 | PEP-utilisers_N, PEP-utilising enzyme, N-terminal                 | 1 | 1 | 0 | 1 | 1 | yes |
| pfam05649 | Peptidase_M13_N, Peptidase family M13                             | 2 | 2 | 2 | 2 | 2 |     |
| pfam05667 | DUF812, Protein of unknown function (DUF812)                      | 1 | 1 | 0 | 0 | 1 | yes |
| pfam05697 | Trigger_N, Bacterial trigger factor protein (TF)                  | 1 | 1 | 1 | 1 | 1 |     |
| pfam05698 | Trigger_C, Bacterial trigger factor protein (TF) C-terminus       | 1 | 1 | 1 | 1 | 1 |     |
| pfam05701 | DUF827, Plant protein of unknown function (DUF827)                | 1 | 1 | 0 | 1 | 1 | yes |
| pfam05746 | DALR_1, DALR anticodon binding domain                             | 1 | 1 | 1 | 1 | 1 |     |
| pfam05872 | DUF853, Bacterial protein of unknown function (DUF853)            | 1 | 1 | 1 | 1 | 1 |     |
| pfam05887 | Trypan_PARP, Procylic acidic repetitive protein (PARP)            | 0 | 0 | 1 | 0 | 0 | yes |
| pfam05896 | NQRA, Na(+)-translocating NADH-quinone reductase subunit A (NQRA) | 2 | 2 | 2 | 2 | 2 |     |
| pfam05913 | DUF871, Bacterial protein of unknown function (DUF871)            | 1 | 1 | 1 | 1 | 1 |     |
| pfam06039 | Mqo, Malate:quinone oxidoreductase (Mqo)                          | 1 | 1 | 1 | 1 | 1 |     |
| pfam06068 | TIP49, TIP49 C-terminus                                           | 3 | 3 | 3 | 3 | 3 |     |
| pfam06071 | YchF-GTPase_C, Protein of unknown function (DUF933)               | 1 | 1 | 1 | 1 | 1 |     |
| pfam06107 | DUF951, Bacterial protein of unknown function (DUF951)            | 1 | 1 | 1 | 1 | 1 |     |
| pfam06144 | DNA_pol3_delta, DNA polymerase III, delta subunit                 | 2 | 2 | 1 | 1 | 2 | yes |
| pfam06271 | RDD, RDD family                                                   | 1 | 1 | 1 | 1 | 1 |     |
| pfam06325 | PrmA, Ribosomal protein L11 methyltransferase (PrmA)              | 1 | 1 | 1 | 1 | 1 |     |
| pfam06415 | iPGM_N, BPG-independent PGAM N-terminus (iPGM_N)                  | 1 | 1 | 1 | 1 | 1 |     |
| pfam06418 | CTP_synth_N, CTP synthase N-terminus                              | 1 | 1 | 1 | 1 | 1 |     |
| pfam06421 | LepA_C, GTP-binding protein LepA C-terminus                       | 1 | 1 | 1 | 1 | 1 |     |
| pfam06470 | SMC_hinge, SMC proteins Flexible Hinge Domain                     | 1 | 1 | 1 | 1 | 1 |     |
| pfam06480 | FtsH_ext, FtsH Extracellular                                      | 1 | 1 | 1 | 1 | 1 |     |

|           |                                                                             |   |   |   |   |   |     |
|-----------|-----------------------------------------------------------------------------|---|---|---|---|---|-----|
| pfam06508 | ExsB, ExsB                                                                  | 2 | 2 | 2 | 2 | 2 |     |
| pfam06574 | FAD_syn, FAD synthetase                                                     | 1 | 1 | 1 | 1 | 1 |     |
| pfam06646 | Mycoplasma_p37, High affinity transport system protein p37                  | 1 | 1 | 1 | 1 | 1 |     |
| pfam06723 | MreB_Mbl, MreB/Mbl protein                                                  | 1 | 1 | 1 | 1 | 1 |     |
| pfam06745 | KaiC, KaiC                                                                  | 2 | 2 | 2 | 2 | 2 |     |
| pfam06808 | DctM, DctM-like transporters                                                | 0 | 0 | 1 | 0 | 1 | yes |
| pfam06827 | zf-FPG_IleRS, Zinc finger found in FPG and IleRS                            | 1 | 1 | 1 | 1 | 1 |     |
| pfam06831 | H2TH, Formamidopyrimidine-DNA glycosylase H2TH domain                       | 1 | 1 | 1 | 1 | 1 |     |
| pfam06838 | Alum_res, Aluminium resistance protein                                      | 1 | 1 | 1 | 1 | 1 |     |
| pfam07155 | ECF-ribofla_trS, ECF-type riboflavin transporter, S component               | 2 | 2 | 2 | 2 | 2 |     |
| pfam07174 | FAP, Fibronectin-attachment protein (FAP)                                   | 1 | 1 | 1 | 1 | 1 |     |
| pfam07223 | DUF1421, Protein of unknown function (DUF1421)                              | 1 | 1 | 1 | 1 | 1 |     |
| pfam07271 | Cytadhesin_P30, Cytadhesin P30/P32                                          | 1 | 1 | 1 | 1 | 1 |     |
| pfam07475 | Hpr_kinase_C, HPr Serine kinase C-terminal domain                           | 1 | 1 | 1 | 1 | 1 |     |
| pfam07479 | NAD_Gly3P_dh_C, NAD-dependent glycerol-3-phosphate dehydrogenase C-terminus | 1 | 1 | 1 | 1 | 1 |     |
| pfam07514 | TraI_2, Putative helicase                                                   | 1 | 1 | 1 | 1 | 1 |     |
| pfam07516 | SecA_SW, SecA Wing and Scaffold domain                                      | 1 | 1 | 1 | 1 | 1 |     |
| pfam07517 | SecA_DEAD, SecA DEAD-like domain                                            | 1 | 1 | 1 | 1 | 1 |     |
| pfam07521 | RMMBL, RNA-metabolising metallo-beta-lactamase                              | 1 | 1 | 1 | 1 | 1 |     |
| pfam07650 | KH_2, KH domain                                                             | 2 | 2 | 2 | 2 | 2 |     |
| pfam07655 | Secretin_N_2, Secretin N-terminal domain                                    | 0 | 0 | 0 | 1 | 0 | yes |
| pfam07672 | MFS_Mycoplasma, Mycoplasma MFS transporter                                  | 2 | 2 | 2 | 2 | 2 |     |
| pfam07673 | DUF1602, Protein of unknown function (DUF1602)                              | 0 | 0 | 1 | 1 | 0 | yes |
| pfam07690 | MFS_1, Major Facilitator Superfamily                                        | 5 | 4 | 5 | 3 | 4 | yes |
| pfam07714 | Pkinase_Tyr, Protein tyrosine kinase                                        | 1 | 1 | 1 | 1 | 1 |     |
| pfam07722 | Peptidase_C26, Peptidase C26                                                | 2 | 2 | 2 | 2 | 0 | yes |

|           |                                                                        |   |   |   |   |   |     |
|-----------|------------------------------------------------------------------------|---|---|---|---|---|-----|
| pfam07724 | AAA_2, AAA domain (Cdc48 subfamily)                                    | 4 | 4 | 4 | 4 | 4 |     |
| pfam07726 | AAA_3, ATPase family associated with various cellular activities (AAA) | 1 | 1 | 1 | 1 | 1 |     |
| pfam07728 | AAA_5, AAA domain (dynein-related subfamily)                           | 6 | 6 | 6 | 6 | 6 |     |
| pfam07733 | DNA_pol3_alpha, Bacterial DNA polymerase III alpha subunit             | 2 | 2 | 3 | 2 | 2 | yes |
| pfam07751 | Abi_2, Abi-like protein                                                | 1 | 1 | 1 | 1 | 1 |     |
| pfam07831 | PYNP_C, Pyrimidine nucleoside phosphorylase C-terminal domain          | 1 | 1 | 1 | 1 | 1 |     |
| pfam07972 | Flavodoxin_NdrI, NrdI Flavodoxin like                                  | 1 | 1 | 1 | 1 | 1 |     |
| pfam07973 | tRNA_SAD, Threonyl and Alanyl tRNA synthetase second additional domain | 1 | 1 | 1 | 1 | 1 |     |
| pfam07992 | Pyr_redox_2, Pyridine nucleotide-disulphide oxidoreductase             | 7 | 7 | 7 | 7 | 7 |     |
| pfam07993 | NAD_binding_4, Male sterility protein                                  | 3 | 3 | 3 | 1 | 3 | yes |
| pfam08032 | SpoU_sub_bind, RNA 2'-O ribose methyltransferase substrate binding     | 2 | 2 | 2 | 2 | 2 |     |
| pfam08125 | Mannitol_dh_C, Mannitol dehydrogenase C-terminal domain                | 1 | 1 | 1 | 1 | 1 |     |
| pfam08178 | GnsAB, GnsA/GnsB family                                                | 1 | 1 | 1 | 1 | 1 |     |
| pfam08206 | OB_RNB, Ribonuclease B OB domain                                       | 1 | 1 | 1 | 1 | 1 |     |
| pfam08207 | EFP_N, Elongation factor P (EF-P) KOW-like domain                      | 1 | 1 | 1 | 1 | 1 |     |
| pfam08220 | HTH_DeoR, DeoR-like helix-turn-helix domain                            | 2 | 2 | 1 | 2 | 1 | yes |
| pfam08241 | Methyltransf_11, Methyltransferase domain                              | 1 | 1 | 1 | 1 | 1 |     |
| pfam08242 | Methyltransf_12, Methyltransferase domain                              | 1 | 1 | 1 | 1 | 1 |     |
| pfam08264 | Anticodon_1, Anticodon-binding domain of tRNA                          | 3 | 3 | 3 | 3 | 3 |     |
| pfam08275 | Toprim_N, DNA primase catalytic core, N-terminal domain                | 1 | 1 | 1 | 1 | 1 |     |
| pfam08282 | Hydrolase_3, haloacid dehalogenase-like hydrolase                      | 8 | 9 | 7 | 9 | 7 | yes |
| pfam08299 | Bac_DnaA_C, Bacterial dnaA protein helix-turn-helix                    | 1 | 1 | 1 | 1 | 1 |     |
| pfam08317 | Spc7, Spc7 kinetochore protein                                         | 3 | 3 | 2 | 3 | 3 | yes |
| pfam08343 | RNR_N, Ribonucleotide reductase N-terminal                             | 1 | 1 | 1 | 1 | 1 |     |
| pfam08352 | oligo_HPY, Oligopeptide/dipeptide transporter, C-terminal region       | 6 | 5 | 8 | 4 | 6 | yes |
| pfam08402 | TOBE_2, TOBE domain                                                    | 1 | 1 | 1 | 1 | 1 |     |

|           |                                                                         |   |   |   |   |   |     |
|-----------|-------------------------------------------------------------------------|---|---|---|---|---|-----|
| pfam08423 | Rad51, Rad51                                                            | 1 | 1 | 1 | 1 | 1 |     |
| pfam08439 | Peptidase_M3_N, Oligopeptidase F                                        | 1 | 1 | 1 | 1 | 1 |     |
| pfam08459 | UvrC_HhH_N, UvrC Helix-hairpin-helix N-terminal                         | 1 | 1 | 1 | 1 | 1 |     |
| pfam08477 | Miro, Miro-like protein                                                 | 3 | 3 | 2 | 3 | 3 | yes |
| pfam08529 | NusA_N, NusA N-terminal domain                                          | 1 | 1 | 1 | 1 | 1 |     |
| pfam08534 | Redoxin, Redoxin                                                        | 1 | 1 | 1 | 1 | 1 |     |
| pfam08543 | Phos_pyr_kin, Phosphomethylpyrimidine kinase                            | 1 | 1 | 1 | 1 | 0 | yes |
| pfam08659 | KR, KR domain                                                           | 1 | 1 | 1 | 1 | 1 |     |
| pfam08668 | HDOD, HDOD domain                                                       | 1 | 1 | 1 | 1 | 1 |     |
| pfam08761 | dUTPase_2, dUTPase                                                      | 1 | 1 | 1 | 1 | 1 |     |
| pfam08843 | DUF1814, Nucleotidyl transferase of unknown function (DUF1814)          | 2 | 2 | 2 | 2 | 2 |     |
| pfam08921 | DUF1904, Domain of unknown function (DUF1904)                           | 1 | 1 | 1 | 1 | 1 |     |
| pfam09180 | ProRS-C_1, Prolyl-tRNA synthetase, C-terminal                           | 1 | 1 | 1 | 1 | 1 |     |
| pfam09269 | DUF1967, Domain of unknown function (DUF1967)                           | 1 | 1 | 1 | 1 | 1 |     |
| pfam09285 | Elong-fact-P_C, Elongation factor P, C-terminal                         | 1 | 1 | 1 | 1 | 1 |     |
| pfam09334 | tRNA-synt_1g, tRNA synthetases class I (M)                              | 6 | 6 | 6 | 6 | 6 |     |
| pfam09499 | RE_ApaLI, ApaLI-like restriction endonuclease                           | 1 | 1 | 1 | 1 | 1 |     |
| pfam09553 | RE_Eco47II, Eco47II restriction endonuclease                            | 1 | 1 | 1 | 1 | 1 |     |
| pfam09580 | Spore_YhcN_YlaJ, Sporulation lipoprotein YhcN/YlaJ (Spore_YhcN_YlaJ)    | 1 | 1 | 0 | 1 | 1 | yes |
| pfam09610 | Myco_arth_vir_N, Mycoplasma virulence signal region (Myco_arth_vir_N)   | 4 | 4 | 3 | 4 | 0 | yes |
| pfam09847 | DUF2074, Predicted permease (DUF2074)                                   | 1 | 1 | 1 | 1 | 1 |     |
| pfam09848 | DUF2075, Uncharacterized conserved protein (DUF2075)                    | 1 | 1 | 1 | 2 | 1 | yes |
| pfam09903 | DUF2130, Uncharacterized protein conserved in bacteria (DUF2130)        | 2 | 2 | 2 | 2 | 0 | yes |
| pfam09954 | DUF2188, Uncharacterized protein conserved in bacteria (DUF2188)        | 1 | 2 | 1 | 1 | 1 | yes |
| pfam10154 | DUF2362, Uncharacterized conserved protein (DUF2362)                    | 0 | 0 | 0 | 0 | 1 | yes |
| pfam10186 | Atg14, UV radiation resistance protein and autophagy-related subunit 14 | 1 | 1 | 1 | 1 | 0 | yes |

|           |                                                                             |   |   |   |   |   |     |
|-----------|-----------------------------------------------------------------------------|---|---|---|---|---|-----|
| pfam10298 | WhiA_N, Sporulation Regulator WhiA N terminal                               | 0 | 1 | 1 | 1 | 1 | yes |
| pfam10385 | RNA_pol_Rpb2_45, RNA polymerase beta subunit external 1 domain              | 1 | 1 | 1 | 1 | 1 |     |
| pfam10396 | TrmE_N, GTP-binding protein TrmE N-terminus                                 | 1 | 2 | 1 | 1 | 1 | yes |
| pfam10397 | ADSL_C, Adenylosuccinate lyase C-terminus                                   | 1 | 1 | 1 | 1 | 1 |     |
| pfam10412 | TrwB_AAD_bind, Type IV secretion-system coupling protein DNA-binding domain | 1 | 1 | 1 | 1 | 1 |     |
| pfam10431 | ClpB_D2-small, C-terminal, D2-small domain, of ClpB protein                 | 1 | 1 | 1 | 1 | 1 |     |
| pfam10437 | Lip_prot_lig_C, Bacterial lipote protein ligase C-terminus                  | 2 | 2 | 2 | 2 | 2 |     |
| pfam10458 | Val_tRNA-synt_C, Valyl tRNA synthetase tRNA binding arm                     | 1 | 1 | 0 | 1 | 1 | yes |
| pfam10662 | PduV-EutP, Ethanolamine utilisation - propanediol utilisation               | 3 | 3 | 2 | 3 | 3 | yes |
| pfam10896 | DUF2714, Protein of unknown function (DUF2714)                              | 1 | 1 | 1 | 1 | 0 | yes |
| pfam11074 | DUF2779, Domain of unknown function(DUF2779)                                | 1 | 1 | 1 | 1 | 1 |     |
| pfam11428 | DUF3196, Protein of unknown function (DUF3196)                              | 1 | 1 | 0 | 1 | 1 | yes |
| pfam11490 | DNA_pol3_alpha_N, DNA polymerase III polC-type N-terminus                   | 1 | 1 | 0 | 1 | 1 | yes |
| pfam11593 | Med3, Mediator complex subunit 3 fungal                                     | 1 | 1 | 0 | 1 | 1 | yes |
| pfam11799 | IMS_C, impB/mucB/samB family C-terminal                                     | 1 | 1 | 1 | 1 | 1 |     |
| pfam11967 | RecO_N, Recombination protein O N terminal                                  | 1 | 1 | 1 | 1 | 1 |     |
| pfam11969 | DcpS_C, Scavenger mRNA decapping enzyme C-term binding                      | 1 | 1 | 1 | 1 | 1 |     |
| pfam11987 | IF-2, Translation-initiation factor 2                                       | 1 | 1 | 1 | 1 | 1 |     |
| pfam12002 | MgsA_C, MgsA AAA+ ATPase C terminal                                         | 1 | 1 | 1 | 1 | 1 |     |
| pfam12072 | DUF3552, Domain of unknown function (DUF3552)                               | 1 | 1 | 1 | 1 | 1 |     |
| pfam12128 | DUF3584, Protein of unknown function (DUF3584)                              | 1 | 1 | 1 | 1 | 1 |     |
| pfam12146 | Hydrolase_4, Putative lysophospholipase                                     | 1 | 1 | 1 | 1 | 1 |     |
| pfam12327 | FtsZ_C, FtsZ family, C-terminal domain                                      | 1 | 1 | 1 | 1 | 1 |     |
| pfam12344 | UvrB, Ultra-violet resistance protein B                                     | 1 | 1 | 1 | 1 | 1 |     |
| pfam12631 | GTPase_Cys_C, Catalytic cysteine-containing C-terminus of GTPase, MnmE      | 1 | 1 | 1 | 1 | 1 |     |
| pfam12679 | ABC2_membrane_2, ABC-2 family transporter protein                           | 2 | 2 | 2 | 1 | 2 | yes |



|           |                                                    |   |   |   |   |   |     |
|-----------|----------------------------------------------------|---|---|---|---|---|-----|
| pfam12695 | Abhydrolase_5, Alpha/beta hydrolase family         | 7 | 8 | 7 | 7 | 7 | yes |
| pfam12697 | Abhydrolase_6, Alpha/beta hydrolase family         | 8 | 9 | 8 | 8 | 8 | yes |
| pfam12698 | ABC2_membrane_3, ABC-2 family transporter protein  | 3 | 3 | 3 | 3 | 3 |     |
| pfam12706 | Lactamase_B_2, Beta-lactamase superfamily domain   | 2 | 2 | 2 | 2 | 2 |     |
| pfam12710 | HAD, haloacid dehalogenase-like hydrolase          | 3 | 3 | 3 | 3 | 2 | yes |
| pfam12730 | ABC2_membrane_4, ABC-2 family transporter protein  | 2 | 1 | 1 | 1 | 1 | yes |
| pfam12738 | PTCB-BRCT, twin BRCT domain                        | 1 | 1 | 0 | 1 | 1 | yes |
| pfam12822 | DUF3816, Protein of unknown function (DUF3816)     | 1 | 1 | 1 | 1 | 1 |     |
| pfam12826 | HHH_2, Helix-hairpin-helix motif                   | 2 | 2 | 1 | 2 | 2 | yes |
| pfam12831 | FAD_oxidored, FAD dependent oxidoreductase         | 3 | 3 | 2 | 3 | 3 | yes |
| pfam12846 | AAA_10, AAA-like domain                            | 1 | 1 | 1 | 1 | 1 |     |
| pfam12847 | Methyltransf_18, Methyltransferase domain          | 4 | 4 | 4 | 4 | 4 |     |
| pfam12848 | ABC_tran_2, ABC transporter                        | 1 | 1 | 1 | 1 | 1 |     |
| pfam12849 | PBP_like_2, PBP superfamily domain                 | 1 | 1 | 2 | 1 | 1 | yes |
| pfam13086 | AAA_11, AAA domain                                 | 3 | 3 | 2 | 4 | 2 | yes |
| pfam13087 | AAA_12, AAA domain                                 | 2 | 2 | 2 | 1 | 0 | yes |
| pfam13091 | PLDc_2, PLD-like domain                            | 1 | 1 | 1 | 1 | 1 |     |
| pfam13098 | Thioredoxin_2, Thioredoxin-like domain             | 1 | 1 | 1 | 1 | 1 |     |
| pfam13147 | Amidohydro_4, Amidohydrolase                       | 1 | 1 | 1 | 1 | 1 |     |
| pfam13155 | Toprim_2, Toprim-like                              | 1 | 1 | 1 | 1 | 1 |     |
| pfam13166 | AAA_13, AAA domain                                 | 5 | 5 | 5 | 4 | 5 | yes |
| pfam13173 | AAA_14, AAA domain                                 | 3 | 3 | 3 | 4 | 3 | yes |
| pfam13177 | DNA_pol3_delta2, DNA polymerase III, delta subunit | 2 | 2 | 2 | 2 | 2 |     |
| pfam13184 | KH_5, NusA-like KH domain                          | 1 | 1 | 1 | 1 | 1 |     |
| pfam13191 | AAA_16, AAA ATPase domain                          | 1 | 1 | 2 | 1 | 1 | yes |
| pfam13195 | DUF4011, Protein of unknown function (DUF4011)     | 1 | 1 | 0 | 0 | 0 | yes |

|           |                                                                              |    |    |    |    |    |     |
|-----------|------------------------------------------------------------------------------|----|----|----|----|----|-----|
| pfam13207 | AAA_17, AAA domain                                                           | 6  | 6  | 7  | 6  | 6  | yes |
| pfam13238 | AAA_18, AAA domain                                                           | 4  | 4  | 4  | 4  | 4  |     |
| pfam13245 | AAA_19, Part of AAA domain                                                   | 2  | 2  | 2  | 3  | 2  | yes |
| pfam13246 | Hydrolase_like2, Putative hydrolase of sodium-potassium ATPase alpha subunit | 3  | 3  | 3  | 3  | 2  | yes |
| pfam13274 | DUF4065, Protein of unknown function (DUF4065)                               | 2  | 2  | 2  | 2  | 2  |     |
| pfam13276 | HTH_21, HTH-like domain                                                      | 28 | 31 | 24 | 27 | 22 | yes |
| pfam13277 | YmdB, YmdB-like protein                                                      | 1  | 1  | 2  | 1  | 1  | yes |
| pfam13278 | DUF4066, Putative amidotransferase                                           | 1  | 1  | 1  | 1  | 1  |     |
| pfam13291 | ACT_4, ACT domain                                                            | 1  | 1  | 1  | 1  | 1  |     |
| pfam13292 | DXP_synthase_N, 1-deoxy-D-xylulose-5-phosphate synthase                      | 1  | 1  | 1  | 1  | 1  |     |
| pfam13303 | PTS_EIIC_2, Phosphotransferase system, EIIC                                  | 2  | 2  | 2  | 2  | 1  | yes |
| pfam13304 | AAA_21, AAA domain                                                           | 15 | 17 | 16 | 15 | 16 | yes |
| pfam13328 | HD_4, HD domain                                                              | 1  | 1  | 0  | 1  | 1  | yes |
| pfam13331 | DUF4093, Domain of unknown function (DUF4093)                                | 1  | 1  | 1  | 1  | 1  |     |
| pfam13333 | rve_2, Integrase core domain                                                 | 27 | 32 | 26 | 23 | 29 | yes |
| pfam13338 | DUF4095, Domain of unknown function (DUF4095)                                | 1  | 1  | 1  | 1  | 1  |     |
| pfam13346 | ABC2_membrane_5, ABC-2 family transporter protein                            | 1  | 0  | 0  | 0  | 0  | yes |
| pfam13347 | MFS_2, MFS/sugar transport protein                                           | 0  | 1  | 0  | 1  | 0  | yes |
| pfam13361 | UvrD_C, UvrD-like helicase C-terminal domain                                 | 2  | 2  | 2  | 1  | 2  | yes |
| pfam13386 | DsbD_2, Family description                                                   | 1  | 1  | 1  | 0  | 1  | yes |
| pfam13393 | tRNA-synt_His, Histidyl-tRNA synthetase                                      | 1  | 1  | 1  | 1  | 1  |     |
| pfam13396 | PLDc_N, Phospholipase_D-nuclease N-terminal                                  | 1  | 1  | 1  | 1  | 1  |     |
| pfam13401 | AAA_22, AAA domain                                                           | 5  | 5  | 6  | 5  | 5  | yes |
| pfam13434 | K_oxygenase, L-lysine 6-monooxygenase (NADPH-requiring)                      | 1  | 1  | 1  | 1  | 1  |     |
| pfam13450 | NAD_binding_8, NAD(P)-binding Rossmann-like domain                           | 6  | 6  | 6  | 3  | 6  | yes |
| pfam13460 | NAD_binding_10, NADH(P)-binding                                              | 1  | 1  | 1  | 1  | 1  |     |

|           |                                                            |    |    |    |    |    |     |
|-----------|------------------------------------------------------------|----|----|----|----|----|-----|
| pfam13476 | AAA_23, AAA domain                                         | 2  | 2  | 2  | 2  | 2  |     |
| pfam13481 | AAA_25, AAA domain                                         | 2  | 2  | 2  | 2  | 2  |     |
| pfam13482 | RNase_H_2, RNase_H superfamily                             | 1  | 1  | 1  | 1  | 1  |     |
| pfam13483 | Lactamase_B_3, Beta-lactamase superfamily domain           | 1  | 1  | 1  | 1  | 1  |     |
| pfam13514 | AAA_27, AAA domain                                         | 1  | 1  | 0  | 0  | 1  | yes |
| pfam13518 | HTH_28, Helix-turn-helix domain                            | 13 | 23 | 19 | 14 | 21 | yes |
| pfam13520 | AA_permease_2, Amino acid permease                         | 6  | 6  | 6  | 6  | 6  |     |
| pfam13521 | AAA_28, AAA domain                                         | 3  | 3  | 3  | 4  | 3  | yes |
| pfam13538 | UvrD_C_2, Family description                               | 3  | 3  | 3  | 3  | 2  | yes |
| pfam13541 | ChII, Subunit ChII of Mg-chelatase                         | 1  | 1  | 1  | 1  | 1  |     |
| pfam13561 | adh_short_C2, Enoyl-(Acyl carrier protein) reductase       | 3  | 3  | 3  | 3  | 3  |     |
| pfam13580 | SIS_2, SIS domain                                          | 1  | 1  | 1  | 1  | 1  |     |
| pfam13594 | Amidohydro_5, Amidohydrolase                               | 1  | 1  | 0  | 1  | 1  | yes |
| pfam13603 | tRNA-synt_1_2, Leucyl-tRNA synthetase, Domain 2            | 2  | 2  | 2  | 2  | 2  |     |
| pfam13604 | AAA_30, AAA domain                                         | 3  | 3  | 3  | 3  | 2  | yes |
| pfam13632 | Glyco_trans_2_3, Glycosyl transferase family group 2       | 5  | 5  | 5  | 2  | 5  | yes |
| pfam13635 | DUF4143, Domain of unknown function (DUF4143)              | 3  | 3  | 3  | 3  | 3  |     |
| pfam13641 | Glyco_tranf_2_3, Glycosyltransferase like family 2         | 8  | 6  | 6  | 3  | 7  | yes |
| pfam13649 | Methyltransf_25, Methyltransferase domain                  | 2  | 2  | 2  | 2  | 2  |     |
| pfam13659 | Methyltransf_26, Methyltransferase domain                  | 3  | 3  | 3  | 3  | 3  |     |
| pfam13662 | Toprim_4, Toprim domain                                    | 1  | 1  | 1  | 1  | 1  |     |
| pfam13671 | AAA_33, AAA domain                                         | 2  | 2  | 2  | 2  | 2  |     |
| pfam13672 | PP2C_2, Protein phosphatase 2C                             | 1  | 1  | 1  | 1  | 1  |     |
| pfam13683 | rve_3, Integrase core domain                               | 26 | 31 | 25 | 22 | 28 | yes |
| pfam13684 | Dak1_2, Dihydroxyacetone kinase family                     | 1  | 1  | 1  | 1  | 1  |     |
| pfam13738 | Pyr_redox_3, Pyridine nucleotide-disulphide oxidoreductase | 3  | 3  | 3  | 3  | 3  |     |

|           |                                                                         |   |   |   |   |   |     |
|-----------|-------------------------------------------------------------------------|---|---|---|---|---|-----|
| pfam13742 | tRNA_anti_2, OB-fold nucleic acid binding domain                        | 1 | 1 | 1 | 1 | 1 |     |
| pfam13749 | HATPase_c_4, ATP-dependent DNA helicase recG C-terminal                 | 2 | 2 | 2 | 2 | 2 |     |
| pfam13779 | DUF4175, Domain of unknown function (DUF4175)                           | 1 | 1 | 0 | 1 | 1 | yes |
| pfam13793 | Pribosyltran_N, N-terminal domain of ribose phosphate pyrophosphokinase | 1 | 1 | 1 | 1 | 1 |     |
| pfam13802 | Gal_mutarotas_2, Galactose mutarotase-like                              | 1 | 1 | 1 | 1 | 1 |     |
| pfam13847 | Methyltransf_31, Methyltransferase domain                               | 2 | 2 | 2 | 2 | 2 |     |
| pfam13851 | GAS, Growth-arrest specific micro-tubule binding                        | 1 | 1 | 1 | 1 | 1 |     |
| pfam13905 | Thioredoxin_8, Thioredoxin-like                                         | 1 | 1 | 1 | 1 | 1 |     |
| pfam13932 | GIDA_assoc_3, GidA associated domain 3                                  | 1 | 1 | 1 | 1 | 1 |     |
| pfam13936 | HTH_38, Helix-turn-helix domain                                         | 1 | 0 | 0 | 1 | 0 | yes |
| pfam14267 | DUF4357, Domain of unknown function (DUF4357)                           | 1 | 1 | 1 | 1 | 1 |     |

---

**Supplementary Table 8. Domain lost in Mmm genomes**

| Domain    | Domain Description                                                     | Ben1 | Ben50 | Ben181 | Ben326 | Ben468 | Domain Lost    |
|-----------|------------------------------------------------------------------------|------|-------|--------|--------|--------|----------------|
| pfam13346 | ABC2_membrane_5, ABC-2 family transporter protein                      | 1    | 0     | 0      | 0      | 0      | Lost in all    |
| pfam00035 | dsmr, Double-stranded RNA binding motif                                | 1    | 1     | 0      | 1      | 1      | Lost in Ben181 |
| pfam00071 | Ras, Ras family                                                        | 1    | 1     | 0      | 1      | 1      | Lost in Ben181 |
| pfam00261 | Tropomyosin, Tropomyosin                                               | 1    | 1     | 0      | 1      | 1      | Lost in Ben181 |
| pfam00533 | BRCT, BRCA1 C Terminus (BRCT) domain                                   | 1    | 1     | 0      | 1      | 1      | Lost in Ben181 |
| pfam01494 | FAD_binding_3, FAD binding domain                                      | 1    | 1     | 0      | 1      | 1      | Lost in Ben181 |
| pfam01576 | Myosin_tail_1, Myosin tail                                             | 1    | 1     | 0      | 1      | 1      | Lost in Ben181 |
| pfam01597 | GCV_H, Glycine cleavage H-protein                                      | 1    | 1     | 0      | 1      | 1      | Lost in Ben181 |
| pfam02590 | SPOUT_MTase, Predicted SPOUT methyltransferase                         | 1    | 1     | 0      | 1      | 1      | Lost in Ben181 |
| pfam02912 | Phe_tRNA-synt_N, Aminoacyl tRNA synthetase class II, N-terminal domain | 1    | 1     | 0      | 1      | 1      | Lost in Ben181 |
| pfam03119 | DNA_ligase_ZBD, NAD-dependent DNA ligase C4 zinc finger domain         | 1    | 1     | 0      | 1      | 1      | Lost in Ben181 |
| pfam03147 | FDX-ACB, Ferredoxin-fold anticodon binding domain                      | 1    | 1     | 0      | 1      | 1      | Lost in Ben181 |
| pfam03448 | MgtE_N, MgtE intracellular N domain                                    | 1    | 1     | 0      | 1      | 1      | Lost in Ben181 |
| pfam05524 | PEP-utilisers_N, PEP-utilising enzyme, N-terminal                      | 1    | 1     | 0      | 1      | 1      | Lost in Ben181 |
| pfam05701 | DUF827, Plant protein of unknown function (DUF827)                     | 1    | 1     | 0      | 1      | 1      | Lost in Ben181 |
| pfam09580 | Spore_YhcN_YlaJ, Sporulation lipoprotein YhcN/YlaJ (Spore_YhcN_YlaJ)   | 1    | 1     | 0      | 1      | 1      | Lost in Ben181 |
| pfam10458 | Val_tRNA-synt_C, Valyl tRNA synthetase tRNA binding arm                | 1    | 1     | 0      | 1      | 1      | Lost in Ben181 |
| pfam11428 | DUF3196, Protein of unknown function (DUF3196)                         | 1    | 1     | 0      | 1      | 1      | Lost in Ben181 |
| pfam11490 | DNA_pol3_alpha_N, DNA polymerase III polC-type N-terminus              | 1    | 1     | 0      | 1      | 1      | Lost in Ben181 |
| pfam11593 | Med3, Mediator complex subunit 3 fungal                                | 1    | 1     | 0      | 1      | 1      | Lost in Ben181 |
| pfam12738 | PTCB-BRCT, twin BRCT domain                                            | 1    | 1     | 0      | 1      | 1      | Lost in Ben181 |
| pfam13328 | HD_4, HD domain                                                        | 1    | 1     | 0      | 1      | 1      | Lost in Ben181 |
| pfam13594 | Amidohydro_5, Amidohydrolase                                           | 1    | 1     | 0      | 1      | 1      | Lost in Ben181 |
| pfam13779 | DUF4175, Domain of unknown function (DUF4175)                          | 1    | 1     | 0      | 1      | 1      | Lost in Ben181 |

|           |                                                                         |   |   |   |   |   |                |
|-----------|-------------------------------------------------------------------------|---|---|---|---|---|----------------|
| pfam01769 | MgtE, Divalent cation transporter                                       | 1 | 1 | 0 | 0 | 1 | Lost in Ben181 |
| pfam02956 | TT_ORF1, TT viral orf 1                                                 | 1 | 1 | 0 | 0 | 1 | Lost in Ben181 |
| pfam02994 | Transposase_22, L1 transposable element                                 | 1 | 1 | 0 | 0 | 1 | Lost in Ben181 |
| pfam04156 | IncA, IncA protein                                                      | 1 | 1 | 0 | 0 | 1 | Lost in Ben181 |
| pfam05667 | DUF812, Protein of unknown function (DUF812)                            | 1 | 1 | 0 | 0 | 1 | Lost in Ben181 |
| pfam13514 | AAA_27, AAA domain                                                      | 1 | 1 | 0 | 0 | 1 | Lost in Ben181 |
| pfam13195 | DUF4011, Protein of unknown function (DUF4011)                          | 1 | 1 | 0 | 0 | 0 | Lost in Ben181 |
| pfam04693 | DDE_Tnp_2, Archaeal putative transposase ISC1217                        | 1 | 2 | 0 | 0 | 0 | Lost in Ben181 |
| pfam01496 | V_ATPase_I, V-type ATPase 116kDa subunit family                         | 1 | 1 | 1 | 0 | 1 | Lost in Ben326 |
| pfam03148 | Tektin, Tektin family                                                   | 1 | 1 | 1 | 0 | 1 | Lost in Ben326 |
| pfam03838 | RecU, Recombination protein U                                           | 1 | 1 | 1 | 0 | 1 | Lost in Ben326 |
| pfam05087 | Rota_VP2, Rotavirus VP2 protein                                         | 1 | 1 | 1 | 0 | 1 | Lost in Ben326 |
| pfam13386 | DsbD_2, Family description                                              | 1 | 1 | 1 | 0 | 1 | Lost in Ben326 |
| pfam09610 | Myco_arth_vir_N, Mycoplasma virulence signal region (Myco_arth_vir_N)   | 4 | 4 | 3 | 4 | 0 | Lost in Ben468 |
| pfam00038 | Filament, Intermediate filament protein                                 | 1 | 1 | 1 | 1 | 0 | Lost in Ben468 |
| pfam08543 | Phos_pyr_kin, Phosphomethylpyrimidine kinase                            | 1 | 1 | 1 | 1 | 0 | Lost in Ben468 |
| pfam10186 | Atg14, UV radiation resistance protein and autophagy-related subunit 14 | 1 | 1 | 1 | 1 | 0 | Lost in Ben468 |
| pfam10896 | DUF2714, Protein of unknown function (DUF2714)                          | 1 | 1 | 1 | 1 | 0 | Lost in Ben468 |
| pfam13087 | AAA_12, AAA domain                                                      | 2 | 2 | 2 | 1 | 0 | Lost in Ben468 |
| pfam07722 | Peptidase_C26, Peptidase C26                                            | 2 | 2 | 2 | 2 | 0 | Lost in Ben468 |
| pfam09903 | DUF2130, Uncharacterized protein conserved in bacteria (DUF2130)        | 2 | 2 | 2 | 2 | 0 | Lost in Ben468 |
| pfam13936 | HTH_38, Helix-turn-helix domain                                         | 1 | 0 | 0 | 1 | 0 | Lost in Ben50  |

**Supplementary Table 9. Domain gain in Mmm genomes**

| Domain    | Domain Description                                            | Ben1 | Ben50 | Ben181 | Ben326 | Ben468 | Domain Gain |
|-----------|---------------------------------------------------------------|------|-------|--------|--------|--------|-------------|
| pfam00437 | T2SE, Type II/IV secretion system protein                     | 0    | 1     |        | 1      | 1      |             |
| pfam02367 | UPF0079, Uncharacterized P-loop hydrolase UPF0079             | 0    | 1     | 1      | 1      | 1      |             |
| pfam10298 | WhiA_N, Sporulation Regulator WhiA N terminal                 | 0    | 1     | 1      | 1      | 1      |             |
| pfam13347 | MFS_2, MFS/sugar transport protein                            | 0    | 1     |        | 1      |        |             |
| pfam02993 | MCPVI, Minor capsid protein VI                                | 0    |       | 1      |        |        |             |
| pfam05104 | Rib_recp_KP_reg, Ribosome receptor lysine/proline rich region | 0    |       | 1      |        |        |             |
| pfam05887 | Trypan_PARP, Procylic acidic repetitive protein (PARP)        | 0    |       | 1      |        |        |             |
| pfam06808 | DctM, DctM-like transporters                                  | 0    |       | 1      |        |        | 1           |
| pfam07655 | Secretin_N_2, Secretin N-terminal domain                      | 0    |       |        | 1      |        |             |
| pfam07673 | DUF1602, Protein of unknown function (DUF1602)                | 0    |       | 1      | 1      |        |             |
| pfam10154 | DUF2362, Uncharacterized conserved protein (DUF2362)          | 0    |       |        |        |        | 1           |

**Supplementary Table 10. Gene variation among Ben serias genomes**

| <b>Ben1 Gene</b> | <b>Length</b> | <b>Ben50</b> | <b>Ben181</b> | <b>Ben326</b> | <b>Ben468</b> | <b>Product</b>                                      | <b>Virulence Gene</b> |
|------------------|---------------|--------------|---------------|---------------|---------------|-----------------------------------------------------|-----------------------|
| ben1_0100        | 501           | Indel        | Indel         | Indel         | Indel         | hemolysin A                                         | To rabiit             |
| ben1_0225        | 492           | Indel        | Indel         | Indel         | Indel         | hypothetical protein                                | To rabiit             |
| ben1_0334        | 117           | Indel        | Indel         | Indel         | Indel         | hypothetical protein                                | To rabiit             |
| ben1_0428        | 543           | Indel        | Indel         | Indel         | Indel         | hypothetical protein                                | To rabiit             |
| ben1_0446        | 783           | Indel        | Indel         | Indel         | Indel         | glycerol-3-phosphate dehydrogenase                  | To rabiit             |
| ben1_0497        | 1497          | Indel        | Indel         | Indel         | Indel         | prolipoprotein                                      | To rabiit             |
| ben1_0500        | 867           | Indel        | Indel         | Indel         | Indel         | ABC transporter ATP-binding protein/permease        | To rabiit             |
| ben1_0841        | 1773          | Indel        | Indel         | Indel         | Indel         | alkylphosphonate ABC transporter permease           | To rabiit             |
| ben1_1036        | 384           | Indel        | Indel         | Indel         | Indel         | glycosyltransferase                                 | To rabiit             |
| ben1_0033        | 5370          | SNP          | SNP           | SNP           | SNP           | efflux ABC transporter, permease protein            | To rabiit             |
| ben1_0117        | 624           | SNP          | SNP           | SNP           | SNP           | hypothetical protein                                | To rabiit             |
| ben1_0521        | 1644          | SNP          | SNP           | SNP           | SNP           | kinase                                              | To rabiit             |
| ben1_0740        | 465           | SNP          | SNP           | SNP           | SNP           | ferric uptake regulator                             | To rabiit             |
| ben1_0913        | 1161          | SNP          | SNP           | SNP           | SNP           | hypothetical protein                                | To rabiit             |
| ben1_0924        | 1161          | SNP          | SNP           | SNP           | SNP           | hypothetical protein                                | To rabiit             |
| ben1_0931        | 546           | SNP          | SNP           | SNP           | SNP           | ATP synthase subunit B                              | To rabiit             |
| ben1_0988        | 942           | SNP          | SNP           | SNP           | SNP           | HPr kinase/phosphorylase                            | To rabiit             |
| ben1_1008        | 1317          | SNP          | SNP           | SNP           | SNP           | replicative DNA helicase                            | To rabiit             |
| ben1_0434        | 1998          | unchange     | Indel         | Indel         | Indel         | Na <sup>+</sup> ABC transporter ATP-binding protein | Weaken to cattle      |
| ben1_0966        | 291           | unchange     | Indel         | Indel         | Indel         | hypothetical protein                                | Weaken to cattle      |
| ben1_0704        | 951           | unchange     | Indel         | Indel         | lost          | hypothetical protein                                | Weaken to cattle      |
| ben1_0705        | 720           | unchange     | Indel         | Indel         | lost          | hypothetical protein                                | Weaken to cattle      |
| ben1_0713        | 681           | unchange     | Indel         | Indel         | lost          | hypothetical protein                                | Weaken to cattle      |
| ben1_0513        | 4155          | unchange     | SNP           | SNP           | SNP           | putative membrane protein                           | Weaken to cattle      |



|           |      |          |         |          |       |                                                        |
|-----------|------|----------|---------|----------|-------|--------------------------------------------------------|
| ben1_0908 | 933  | Indel    | SNP     | SNP      | Indel | carbamate kinase                                       |
| ben1_0060 | 183  | Indel    | Indel   | Indel    | Indel | IS1296IE transposase protein A                         |
| ben1_0099 | 1404 | Indel    | Indel   | Indel    | Indel | IS1634AW transposase                                   |
| ben1_0143 | 492  | Indel    | Indel   | Indel    | Indel | IS1296MP transposase protein B                         |
| ben1_0148 | 804  | Indel    | Indel   | Indel    | Indel | IS1296MP transposase protein B                         |
| ben1_0252 | 492  | Indel    | Indel   | Indel    | Indel | IS1296MP transposase protein B                         |
| ben1_0259 | 288  | Indel    | Indel   | Indel    | Indel | IS1296AB_B transposase protein A                       |
| ben1_0372 | 288  | Indel    | Indel   | Indel    | Indel | IS1296AB_B transposase protein A                       |
| ben1_0396 | 492  | Indel    | Indel   | Indel    | Indel | IS1296MP transposase protein B                         |
| ben1_0569 | 492  | Indel    | Indel   | Indel    | Indel | IS1296MP transposase protein B                         |
| ben1_0609 | 651  | Indel    | Indel   | Indel    | Indel | IS1296IE transposase protein B                         |
| ben1_0618 | 621  | Indel    | Indel   | Indel    | Indel | transposase ISMmy1E                                    |
| ben1_0647 | 1428 | Indel    | Indel   | Indel    | Indel | transposase, IS4 family                                |
| ben1_0834 | 1179 | Indel    | Indel   | Indel    | Indel | transposase ISMmy1F                                    |
| ben1_0850 | 1674 | Indel    | Indel   | Indel    | Indel | IS1634AW transposase                                   |
| ben1_0891 | 288  | Indel    | Indel   | Indel    | Indel | IS1296AB_B transposase protein A                       |
| ben1_0940 | 288  | Indel    | Indel   | Indel    | Indel | IS1296AB_B transposase protein A                       |
| ben1_0996 | 492  | Indel    | Indel   | Indel    | Indel | IS1296MP transposase protein B                         |
| ben1_1093 | 492  | Indel    | Indel   | Indel    | Indel | IS1296MP transposase protein B                         |
| ben1_0125 | 771  | Indel    | Indel   | unchange | Indel | IS1296MP transposase protein B                         |
| ben1_0374 | 876  | unchange | Indel   | Indel    | Indel | putative transposase InsK for insertion sequence IS150 |
| ben1_0427 | 414  | unchange | Indel   | Indel    | Indel | IS1296MP transposase protein B                         |
| ben1_0711 | 849  | unchange | Indel   | unchange | Indel | IS1296AB_B transposase protein B                       |
| ben1_1046 | 543  | SNP-syn  | SNP-syn | Indel    | Indel | hypothetical protein                                   |
| ben1_0715 | 600  | unchange | Indel   | unchange | Indel | hypothetical protein                                   |
| ben1_0945 | 651  | unchange | SNP     | unchange | Indel | CTP synthetase                                         |

|           |      |          |          |          |       |                                    |
|-----------|------|----------|----------|----------|-------|------------------------------------|
| ben1_0885 | 2379 | unchange | unchange | Indel    | Indel | glycosyl hydrolase family protein  |
| ben1_0139 | 1599 | unchange | unchange | SNP      | Indel | CTP synthetase                     |
| ben1_0108 | 219  | unchange | unchange | unchange | Indel | hypothetical protein               |
| ben1_0481 | 738  | unchange | unchange | unchange | Indel | NH(3)-dependent NAD(+) synthetase  |
| ben1_0668 | 444  | unchange | unchange | unchange | Indel | hypothetical protein               |
| ben1_1047 | 219  | unchange | unchange | unchange | Indel | hypothetical protein               |
| ben1_0669 | 912  | unchange | unchange | unchange | lost  | hypothetical protein               |
| ben1_0670 | 495  | unchange | unchange | unchange | lost  | hypothetical protein               |
| ben1_0671 | 1464 | unchange | unchange | unchange | lost  | hypothetical protein               |
| ben1_0672 | 2580 | unchange | unchange | unchange | lost  | prolipoprotein                     |
| ben1_0673 | 2253 | unchange | unchange | unchange | lost  | hypothetical protein               |
| ben1_0674 | 2556 | unchange | unchange | unchange | lost  | prolipoprotein                     |
| ben1_0675 | 2253 | unchange | unchange | unchange | lost  | mycoplasma virulence signal region |
| ben1_0676 | 354  | unchange | unchange | unchange | lost  | IS1296 transposase protein B       |
| ben1_0677 | 492  | Indel    | Indel    | Indel    | lost  | IS1296MP transposase protein B     |
| ben1_0678 | 180  | unchange | SNP      | SNP      | lost  | IS1296MP transposase protein A     |
| ben1_0680 | 1362 | unchange | unchange | unchange | lost  | hypothetical protein               |
| ben1_0681 | 444  | unchange | unchange | unchange | lost  | hypothetical protein               |
| ben1_0682 | 2253 | unchange | Indel    | unchange | lost  | hypothetical protein               |
| ben1_0684 | 1524 | unchange | SNP      | SNP      | lost  | transposase, IS4 family            |
| ben1_0685 | 2589 | unchange | Indel    | unchange | lost  | prolipoprotein                     |
| ben1_0686 | 2262 | unchange | Indel    | unchange | lost  | mycoplasma virulence signal region |
| ben1_0687 | 162  | unchange | unchange | unchange | lost  | hypothetical protein               |
| ben1_0688 | 417  | unchange | unchange | unchange | lost  | hypothetical protein               |
| ben1_0689 | 966  | unchange | unchange | unchange | lost  | hypothetical protein               |
| ben1_0690 | 228  | unchange | unchange | unchange | lost  | hypothetical protein               |

|           |      |          |          |          |      |                                                        |
|-----------|------|----------|----------|----------|------|--------------------------------------------------------|
| ben1_0691 | 465  | unchange | unchange | Indel    | lost | hypothetical protein                                   |
| ben1_0692 | 846  | unchange | unchange | unchange | lost | fructose-bisphosphate aldolase class-II                |
| ben1_0693 | 735  | unchange | Indel    | unchange | lost | DeoR family sucrose PTS repressor                      |
| ben1_0694 | 1887 | unchange | unchange | unchange | lost | PTS system, sucrose-specific IIBC component            |
| ben1_0695 | 942  | unchange | SNP-syn  | Indel    | lost | hexose kinase                                          |
| ben1_0696 | 513  | unchange | unchange | unchange | lost | hypothetical protein                                   |
| ben1_0697 | 957  | unchange | unchange | unchange | lost | hypothetical protein                                   |
| ben1_0698 | 894  | unchange | unchange | SNP      | lost | hypothetical protein                                   |
| ben1_0699 | 378  | unchange | unchange | unchange | lost | hypothetical protein                                   |
| ben1_0701 | 801  | unchange | unchange | Indel    | lost | prolipoprotein                                         |
| ben1_0702 | 273  | SNP      | Indel    | Indel    | lost | hypothetical protein                                   |
| ben1_0703 | 369  | unchange | unchange | Indel    | lost | hypothetical protein                                   |
| ben1_0706 | 2667 | unchange | Indel    | unchange | lost | hypothetical protein                                   |
| ben1_0707 | 486  | unchange | unchange | unchange | lost | Fic family protein                                     |
| ben1_0708 | 126  | unchange | unchange | unchange | lost | hypothetical protein                                   |
| ben1_0709 | 159  | unchange | unchange | unchange | lost | hypothetical protein                                   |
| ben1_0184 | 894  | SNP      | SNP      | unchange | SNP  | IS1296MP transposase protein B                         |
| ben1_0269 | 894  | SNP      | SNP      | unchange | SNP  | IS1296MP transposase protein B                         |
| ben1_0840 | 894  | SNP      | SNP      | unchange | SNP  | IS1296MP transposase protein B                         |
| ben1_0131 | 774  | SNP      | Indel    | Indel    | SNP  | hypothetical protein                                   |
| ben1_0947 | 861  | SNP      | SNP      | SNP      | SNP  | putative transposase InsK for insertion sequence IS150 |
| ben1_0340 | 2949 | SNP      | Indel    | Indel    | SNP  | hypothetical protein                                   |
| ben1_0919 | 906  | SNP      | Indel    | Indel    | SNP  | carbamate kinase                                       |
| ben1_0503 | 474  | SNP      | Indel    | SNP      | SNP  | metalloprotein, YbeY family                            |
| ben1_0583 | 1827 | SNP      | Indel    | SNP      | SNP  | hypothetical protein                                   |
| ben1_0208 | 2286 | SNP      | SNP      | Indel    | SNP  | hypothetical protein                                   |

|           |      |          |       |          |     |                                  |
|-----------|------|----------|-------|----------|-----|----------------------------------|
| ben1_0818 | 909  | SNP      | SNP   | Indel    | SNP | RNA pseudouridylate synthase     |
| ben1_0539 | 399  | unchange | Indel | unchange | SNP | histidine triad protein          |
| ben1_0994 | 1470 | unchange | Indel | unchange | SNP | hypothetical protein             |
| ben1_0250 | 1413 | SNP      | SNP   | SNP      | SNP | transposase ISMmy1F              |
| ben1_0847 | 1413 | SNP      | SNP   | SNP      | SNP | transposase ISMmy1F              |
| ben1_0015 | 861  | SNP      | SNP   | SNP      | SNP | IS1296SQ transposase protein B   |
| ben1_0038 | 1521 | SNP      | SNP   | SNP      | SNP | IS1634AC transposase             |
| ben1_0058 | 861  | SNP      | SNP   | SNP      | SNP | IS1296IE transposase protein B   |
| ben1_0144 | 543  | SNP      | SNP   | SNP      | SNP | IS1296QT transposase protein A   |
| ben1_0176 | 1521 | SNP      | SNP   | SNP      | SNP | IS1634AC transposase             |
| ben1_0182 | 1521 | SNP      | SNP   | SNP      | SNP | IS1634AC transposase             |
| ben1_0267 | 1521 | SNP      | SNP   | SNP      | SNP | IS1634AC transposase             |
| ben1_0273 | 1521 | SNP      | SNP   | SNP      | SNP | IS1634AC transposase             |
| ben1_0365 | 1521 | SNP      | SNP   | SNP      | SNP | IS1634AC transposase             |
| ben1_0563 | 1674 | SNP      | SNP   | SNP      | SNP | transposase, IS4 family          |
| ben1_0612 | 1521 | SNP      | SNP   | SNP      | SNP | IS1634AC transposase             |
| ben1_0710 | 543  | SNP      | SNP   | SNP      | SNP | IS1296AB_B transposase protein A |
| ben1_0716 | 1521 | SNP      | SNP   | SNP      | SNP | IS1634AC transposase             |
| ben1_1066 | 1521 | SNP      | SNP   | SNP      | SNP | IS1634AC transposase             |
| ben1_1088 | 1521 | SNP      | SNP   | SNP      | SNP | IS1634AC transposase             |
| ben1_0016 | 180  | unchange | SNP   | SNP      | SNP | IS1296MP transposase protein A   |
| ben1_0059 | 180  | unchange | SNP   | SNP      | SNP | IS1296MP transposase protein A   |
| ben1_0073 | 1524 | unchange | SNP   | SNP      | SNP | transposase, IS4 family          |
| ben1_0123 | 1524 | unchange | SNP   | SNP      | SNP | transposase, IS4 family          |
| ben1_0226 | 180  | unchange | SNP   | SNP      | SNP | IS1296MP transposase protein A   |
| ben1_0253 | 180  | unchange | SNP   | SNP      | SNP | IS1296MP transposase protein A   |

|           |      |          |          |          |     |                                                            |
|-----------|------|----------|----------|----------|-----|------------------------------------------------------------|
| ben1_0343 | 1674 | unchange | SNP      | SNP      | SNP | IS1634AW transposase                                       |
| ben1_0391 | 1524 | unchange | SNP      | SNP      | SNP | transposase, IS4 family                                    |
| ben1_0439 | 1524 | unchange | SNP      | SNP      | SNP | transposase, IS4 family                                    |
| ben1_0570 | 180  | unchange | SNP      | SNP      | SNP | IS1296MP transposase protein A                             |
| ben1_0610 | 180  | unchange | SNP      | SNP      | SNP | IS1296MP transposase protein A                             |
| ben1_0747 | 1524 | unchange | SNP      | SNP      | SNP | transposase, IS4 family                                    |
| ben1_0858 | 1524 | unchange | SNP      | SNP      | SNP | transposase, IS4 family                                    |
| ben1_0901 | 1524 | unchange | SNP      | SNP      | SNP | transposase, IS4 family                                    |
| ben1_0915 | 1524 | unchange | SNP      | SNP      | SNP | transposase, IS4 family                                    |
| ben1_0948 | 180  | unchange | SNP      | SNP      | SNP | IS1296DS transposase protein A                             |
| ben1_0963 | 1524 | unchange | SNP      | SNP      | SNP | transposase, IS4 family                                    |
| ben1_0997 | 180  | unchange | SNP      | SNP      | SNP | IS1296MP transposase protein A                             |
| ben1_1035 | 1524 | unchange | SNP      | SNP      | SNP | transposase, IS4 family                                    |
| ben1_1094 | 180  | unchange | SNP      | SNP      | SNP | IS1296MP transposase protein A                             |
| ben1_0712 | 141  | unchange | SNP      | unchange | SNP | hypothetical protein                                       |
| ben1_1092 | 354  | unchange | unchange | unchange | SNP | IS1296 transposase protein B                               |
| ben1_0224 | 354  | unchange | unchange | unchange | SNP | IS1296JI transposase protein B                             |
| ben1_0345 | 870  | unchange | unchange | Indel    | SNP | hypothetical protein                                       |
| ben1_1020 | 1335 | unchange | unchange | Indel    | SNP | oligopeptide ABC transporter ATP-binding protein           |
| ben1_1028 | 963  | unchange | unchange | Indel    | SNP | oligopeptide ABC transporter permease                      |
| ben1_1037 | 963  | unchange | unchange | Indel    | SNP | oligopeptide ABC transporter permease                      |
| ben1_0011 | 1653 | unchange | unchange | SNP      | SNP | ribose/galactose ABC transporter substrate-binding protein |
| ben1_0234 | 894  | unchange | unchange | SNP      | SNP | guanylate kinase                                           |
| ben1_0286 | 1437 | unchange | unchange | SNP      | SNP | pyruvate kinase                                            |
| ben1_0359 | 1245 | unchange | unchange | SNP      | SNP | histidyl-tRNA synthetase                                   |
| ben1_0508 | 1521 | unchange | unchange | SNP      | SNP | putative RNA polymerase sigma factor RpoD                  |

|           |      |          |          |          |          |                                                           |
|-----------|------|----------|----------|----------|----------|-----------------------------------------------------------|
| ben1_0952 | 1539 | unchange | unchange | SNP      | SNP      | amino acid permease                                       |
| ben1_1063 | 3876 | unchange | unchange | SNP      | SNP      | DNA-directed RNA polymerase, beta subunit                 |
| ben1_0010 | 1617 | unchange | unchange | unchange | SNP      | ABC transporter, ATP-binding protein                      |
| ben1_0114 | 1539 | unchange | unchange | unchange | SNP      | ABC transporter ATP-binding protein                       |
| ben1_0153 | 1899 | unchange | unchange | unchange | SNP      | hypothetical protein                                      |
| ben1_0194 | 3144 | unchange | unchange | unchange | SNP      | oligopeptide ABC transporter, substrate-binding component |
| ben1_1090 | 243  | unchange | unchange | unchange | SNP      | variable prolipoprotein                                   |
| ben1_0112 | 441  | SNP      | SNP-syn  | unchange | SNP-syn  | hypothetical protein                                      |
| ben1_0912 | 2829 | SNP      | SNP      | SNP      | SNP-syn  | magnesium-importing ATPase                                |
| ben1_0923 | 2829 | SNP      | SNP      | SNP      | SNP-syn  | magnesium-importing ATPase                                |
| ben1_0921 | 165  | SNP      | unchange | SNP-syn  | SNP-syn  | hypothetical protein                                      |
| ben1_0862 | 1596 | SNP-syn  | SNP-syn  | SNP-syn  | SNP-syn  | phosphoglyceromutase                                      |
| ben1_0527 | 813  | SNP-syn  | Indel    | unchange | SNP-syn  | phosphate ABC transporter, ATP-binding protein            |
| ben1_0558 | 945  | SNP-syn  | Indel    | Indel    | SNP-syn  | glycerol ABC transporter ATP-binding protein              |
| ben1_0910 | 165  | SNP-syn  | unchange | SNP-syn  | SNP-syn  | hypothetical protein                                      |
| ben1_0262 | 1665 | unchange | unchange | unchange | SNP-syn  | immunodominant protein P72                                |
| ben1_0382 | 1026 | unchange | unchange | Indel    | SNP-syn  | phosphatidate cytidyltransferase                          |
| ben1_0388 | 1071 | unchange | unchange | unchange | SNP-syn  | hypothetical protein                                      |
| ben1_0769 | 1227 | unchange | unchange | unchange | SNP-syn  | cobalt transporter ATP-binding subunit                    |
| ben1_0939 | 2187 | unchange | unchange | unchange | SNP-syn  | prolipoprotein                                            |
| ben1_0953 | 681  | unchange | unchange | SNP-syn  | SNP-syn  | putative membrane protein                                 |
| ben1_1024 | 219  | unchange | unchange | unchange | SNP-syn  | hypothetical protein                                      |
| ben1_1032 | 219  | unchange | unchange | unchange | SNP-syn  | hypothetical protein                                      |
| ben1_1040 | 219  | unchange | unchange | unchange | SNP-syn  | hypothetical protein                                      |
| ben1_0882 | 297  | Indel    | Indel    | Indel    | unchange | hypothetical protein                                      |
| ben1_1095 | 126  | Indel    | Indel    | Indel    | unchange | hypothetical protein                                      |

|           |      |          |          |          |          |                                             |
|-----------|------|----------|----------|----------|----------|---------------------------------------------|
| ben1_0265 | 879  | Indel    | unchange | Indel    | unchange | hypothetical protein                        |
| ben1_1087 | 492  | Indel    | unchange | Indel    | unchange | prolipoprotein lppC                         |
| ben1_0916 | 786  | Indel    | unchange | unchange | unchange | glucokinase                                 |
| ben1_0443 | 696  | SNP      | unchange | Indel    | unchange | hypothetical protein                        |
| ben1_0110 | 915  | SNP      | unchange | SNP      | unchange | glycosyltransferase                         |
| ben1_0111 | 873  | SNP      | unchange | SNP      | unchange | nucleotidyl transferase                     |
| ben1_1027 | 594  | SNP      | unchange | SNP      | unchange | glycosyltransferase                         |
| ben1_1042 | 915  | SNP      | unchange | SNP      | unchange | glycosyltransferase                         |
| ben1_1044 | 915  | SNP      | unchange | SNP      | unchange | glycosyltransferase                         |
| ben1_1045 | 873  | SNP      | unchange | SNP      | unchange | nucleotidyl transferase                     |
| ben1_0562 | 1869 | SNP      | unchange | unchange | unchange | lipoprotein B precursor                     |
| ben1_0132 | 123  | SNP-syn  | SNP-syn  | SNP-syn  | unchange | hypothetical protein                        |
| ben1_0851 | 1218 | SNP-syn  | SNP-syn  | unchange | unchange | variable surface protein                    |
| ben1_0852 | 1218 | SNP-syn  | SNP-syn  | unchange | unchange | variable surface protein                    |
| ben1_0853 | 1218 | SNP-syn  | SNP-syn  | unchange | unchange | variable surface protein                    |
| ben1_0854 | 1218 | SNP-syn  | SNP-syn  | unchange | unchange | variable surface protein                    |
| ben1_1015 | 5919 | SNP-syn  | unchange | unchange | unchange | hypothetical protein                        |
| ben1_0312 | 2907 | unchange | SNP-syn  | unchange | unchange | E1-E2 ATPase                                |
| ben1_0330 | 1116 | unchange | SNP-syn  | unchange | unchange | serine/threonine protein kinase             |
| ben1_0371 | 645  | unchange | SNP-syn  | unchange | unchange | transmembrane protein                       |
| ben1_0486 | 819  | unchange | SNP-syn  | Indel    | unchange | hypothetical protein                        |
| ben1_0579 | 1158 | unchange | SNP-syn  | Indel    | unchange | N-acetylglucosamine-6-phosphate deacetylase |
| ben1_0657 | 1776 | unchange | SNP-syn  | unchange | unchange | molecular chaperone DnaK                    |
| ben1_0667 | 2313 | unchange | SNP-syn  | unchange | unchange | hypothetical protein                        |
| ben1_0734 | 2964 | unchange | SNP-syn  | Indel    | unchange | DNA polymerase III subunit alpha            |
| ben1_0822 | 756  | unchange | SNP-syn  | unchange | unchange | hypothetical protein                        |

|           |      |          |         |          |          |                                                               |
|-----------|------|----------|---------|----------|----------|---------------------------------------------------------------|
| ben1_0878 | 1389 | unchange | SNP-syn | Indel    | unchange | beta-glucosidase                                              |
| ben1_0968 | 1203 | unchange | SNP-syn | SNP-syn  | unchange | prolipoprotein                                                |
| ben1_1056 | 1212 | unchange | Indel   | SNP-syn  | unchange | variable surface prolipoprotein                               |
| ben1_1059 | 1236 | unchange | Indel   | Indel    | unchange | variable surface prolipoprotein                               |
| ben1_0127 | 126  | unchange | Indel   | Indel    | unchange | hypothetical protein                                          |
| ben1_0175 | 1404 | unchange | Indel   | Indel    | unchange | Mg <sup>2+</sup> transporter                                  |
| ben1_0266 | 204  | unchange | Indel   | Indel    | unchange | hypothetical protein                                          |
| ben1_0329 | 903  | unchange | Indel   | Indel    | unchange | hypothetical protein                                          |
| ben1_0381 | 4449 | unchange | Indel   | Indel    | unchange | DNA polymerase III subunit alpha                              |
| ben1_0435 | 501  | unchange | Indel   | Indel    | unchange | hypothetical protein                                          |
| ben1_0553 | 2184 | unchange | Indel   | Indel    | unchange | exodeoxyribonuclease V subunit alpha                          |
| ben1_0582 | 1638 | unchange | Indel   | Indel    | unchange | hypothetical protein                                          |
| ben1_0594 | 2745 | unchange | Indel   | Indel    | unchange | hypothetical protein                                          |
| ben1_0641 | 1053 | unchange | Indel   | Indel    | unchange | phenylalanine--tRNA ligase, alpha subunit                     |
| ben1_0731 | 1185 | unchange | Indel   | Indel    | unchange | chromosome replication initiation/membrane attachment protein |
| ben1_0835 | 231  | unchange | Indel   | Indel    | unchange | hypothetical protein                                          |
| ben1_0856 | 1149 | unchange | Indel   | Indel    | unchange | hypothetical protein                                          |
| ben1_0949 | 249  | unchange | Indel   | Indel    | unchange | hypothetical protein                                          |
| ben1_0993 | 951  | unchange | Indel   | Indel    | unchange | hypothetical protein                                          |
| ben1_0027 | 414  | unchange | Indel   | unchange | unchange | 30S ribosomal protein S6                                      |
| ben1_0053 | 309  | unchange | Indel   | unchange | unchange | hypothetical protein                                          |
| ben1_0078 | 2733 | unchange | Indel   | unchange | unchange | phosphonate ABC transporter, permease protein PhnE            |
| ben1_0091 | 2835 | unchange | Indel   | unchange | unchange | preprotein translocase subunit SecA                           |
| ben1_0107 | 2136 | unchange | Indel   | unchange | unchange | hypothetical protein                                          |
| ben1_0137 | 1215 | unchange | Indel   | unchange | unchange | HD domain protein                                             |
| ben1_0158 | 1473 | unchange | Indel   | unchange | unchange | hypothetical protein                                          |



|           |      |          |       |          |          |                                                                             |
|-----------|------|----------|-------|----------|----------|-----------------------------------------------------------------------------|
| ben1_0185 | 840  | unchange | Indel | unchange | unchange | hypothetical protein                                                        |
| ben1_0202 | 2445 | unchange | Indel | unchange | unchange | transfer complex protein TrsE                                               |
| ben1_0222 | 132  | unchange | Indel | unchange | unchange | hypothetical protein                                                        |
| ben1_0242 | 3129 | unchange | Indel | unchange | unchange | spermidine/putrescine ABC transporter permease/substrate-binding protein    |
| ben1_0279 | 822  | unchange | Indel | unchange | unchange | hypothetical protein                                                        |
| ben1_0291 | 990  | unchange | Indel | unchange | unchange | transketolase                                                               |
| ben1_0298 | 1722 | unchange | Indel | unchange | unchange | phosphoenolpyruvate-protein phosphotransferase                              |
| ben1_0321 | 1062 | unchange | Indel | unchange | unchange | hypothetical protein                                                        |
| ben1_0322 | 1605 | unchange | Indel | unchange | unchange | hypothetical protein                                                        |
| ben1_0326 | 2619 | unchange | Indel | unchange | unchange | valyl-tRNA synthetase                                                       |
| ben1_0339 | 2115 | unchange | Indel | unchange | unchange | efflux ABC transporter, permease protein                                    |
| ben1_0376 | 300  | unchange | Indel | unchange | unchange | hypothetical protein                                                        |
| ben1_0387 | 633  | unchange | Indel | unchange | unchange | hypothetical protein                                                        |
| ben1_0401 | 798  | unchange | Indel | unchange | unchange | Lipase esterase                                                             |
| ben1_0403 | 1545 | unchange | Indel | unchange | unchange | hypothetical protein                                                        |
| ben1_0419 | 618  | unchange | Indel | unchange | unchange | Chain A, Structure Of Deoxyadenosine Kinase From M.Mycoides With Bound Datp |
| ben1_0445 | 1308 | unchange | Indel | unchange | unchange | GTP-binding protein EngA                                                    |
| ben1_0456 | 1431 | unchange | Indel | unchange | unchange | hypothetical protein                                                        |
| ben1_0462 | 468  | unchange | Indel | unchange | unchange | hypothetical protein                                                        |
| ben1_0478 | 753  | unchange | Indel | unchange | unchange | hypothetical protein                                                        |
| ben1_0489 | 2145 | unchange | Indel | unchange | unchange | hypothetical protein                                                        |
| ben1_0498 | 5265 | unchange | Indel | unchange | unchange | efflux ABC transporter, permease protein                                    |
| ben1_0509 | 678  | unchange | Indel | unchange | unchange | hypothetical protein                                                        |
| ben1_0515 | 2265 | unchange | Indel | unchange | unchange | GTP diphosphokinase                                                         |
| ben1_0519 | 699  | unchange | Indel | unchange | unchange | ribonuclease III                                                            |
| ben1_0525 | 1152 | unchange | Indel | unchange | unchange | phosphate ABC transporter substrate-binding protein                         |

|           |      |          |       |          |          |                                           |
|-----------|------|----------|-------|----------|----------|-------------------------------------------|
| ben1_0531 | 774  | unchange | Indel | unchange | unchange | metallophosphoesterase                    |
| ben1_0543 | 438  | unchange | Indel | unchange | unchange | nitrogen fixation protein NIFU            |
| ben1_0552 | 2697 | unchange | Indel | unchange | unchange | DNA topoisomerase IV, A subunit           |
| ben1_0560 | 501  | unchange | Indel | unchange | unchange | hypothetical protein                      |
| ben1_0574 | 858  | unchange | Indel | unchange | unchange | hypothetical protein                      |
| ben1_0575 | 345  | unchange | Indel | unchange | unchange | putative calcium-binding protein          |
| ben1_0588 | 1359 | unchange | Indel | unchange | unchange | dihydrolipoamide dehydrogenase            |
| ben1_0592 | 1104 | unchange | Indel | unchange | unchange | GTPase                                    |
| ben1_0593 | 1209 | unchange | Indel | unchange | unchange | DNA polymerase IV                         |
| ben1_0606 | 303  | unchange | Indel | unchange | unchange | 50S ribosomal protein L21                 |
| ben1_0616 | 675  | unchange | Indel | unchange | unchange | prolipoprotein                            |
| ben1_0623 | 624  | unchange | Indel | unchange | unchange | hypothetical protein                      |
| ben1_0633 | 417  | unchange | Indel | unchange | unchange | hypothetical protein                      |
| ben1_0640 | 2385 | unchange | Indel | unchange | unchange | phenylalanyl-tRNA synthetase subunit beta |
| ben1_0643 | 4449 | unchange | Indel | unchange | unchange | efflux ABC transporter, permease protein  |
| ben1_0719 | 1221 | unchange | Indel | unchange | unchange | hypothetical protein                      |
| ben1_1086 | 1413 | SNP      | SNP   | SNP      | unchange | transposase ISMmy1F                       |
| ben1_0146 | 1674 | unchange | SNP   | unchange | unchange | IS1634AW transposase                      |
| ben1_0400 | 1674 | unchange | SNP   | unchange | unchange | IS1634AW transposase                      |
| ben1_0412 | 1674 | unchange | SNP   | unchange | unchange | IS1634AW transposase                      |
| ben1_0451 | 1674 | unchange | SNP   | unchange | unchange | IS1634AW transposase                      |
| ben1_0595 | 1674 | unchange | SNP   | unchange | unchange | IS1634AW transposase                      |
| ben1_0723 | 1674 | unchange | SNP   | unchange | unchange | IS1634AW transposase                      |
| ben1_0770 | 1674 | unchange | SNP   | unchange | unchange | IS1634AW transposase                      |
| ben1_0918 | 1674 | unchange | SNP   | unchange | unchange | IS1634AW transposase                      |
| ben1_0925 | 1674 | unchange | SNP   | unchange | unchange | IS1634AW transposase                      |

|           |      |          |       |          |          |                                                            |
|-----------|------|----------|-------|----------|----------|------------------------------------------------------------|
| ben1_0967 | 1674 | unchange | SNP   | unchange | unchange | IS1634AW transposase                                       |
| ben1_0981 | 1674 | unchange | SNP   | unchange | unchange | IS1634AW transposase                                       |
| ben1_1021 | 1674 | unchange | SNP   | unchange | unchange | IS1634AW transposase                                       |
| ben1_1026 | 1674 | unchange | SNP   | unchange | unchange | IS1634AW transposase                                       |
| ben1_1029 | 1674 | unchange | SNP   | unchange | unchange | IS1634AW transposase                                       |
| ben1_1043 | 1674 | unchange | SNP   | unchange | unchange | IS1634AW transposase                                       |
| ben1_0733 | 2736 | unchange | Indel | unchange | unchange | DNA polymerase I                                           |
| ben1_0760 | 1563 | unchange | Indel | unchange | unchange | putative membrane protein                                  |
| ben1_0762 | 2805 | unchange | Indel | unchange | unchange | putative lipoprotein                                       |
| ben1_0766 | 756  | unchange | Indel | unchange | unchange | putative tRNA pseudouridine synthase A                     |
| ben1_0809 | 762  | unchange | Indel | unchange | unchange | hypothetical protein                                       |
| ben1_0811 | 1602 | unchange | Indel | unchange | unchange | cation transport protein                                   |
| ben1_0816 | 2007 | unchange | Indel | unchange | unchange | DNA ligase                                                 |
| ben1_0894 | 2163 | unchange | Indel | unchange | unchange | ribonucleoside-diphosphate reductase, alpha subunit        |
| ben1_0929 | 1578 | unchange | Indel | unchange | unchange | ATP synthase F1, alpha subunit                             |
| ben1_0959 | 1095 | unchange | Indel | unchange | unchange | GTP-dependent nucleic acid-binding protein EngD            |
| ben1_0978 | 816  | unchange | Indel | unchange | unchange | SIS domain protein                                         |
| ben1_0986 | 933  | unchange | Indel | unchange | unchange | thioredoxin reductase                                      |
| ben1_1003 | 744  | unchange | Indel | unchange | unchange | DNA (cytosine-5-)-methyltransferase                        |
| ben1_1102 | 330  | unchange | Indel | unchange | unchange | ribonuclease P (protein C5)                                |
| ben1_0636 | 933  | unchange | SNP   | SNP      | unchange | S-adenosyl-methyltransferase MraW                          |
| ben1_0009 | 2568 | unchange | SNP   | unchange | unchange | amino acid or sugar ABC transport system, permease protein |
| ben1_0476 | 1854 | unchange | SNP   | unchange | unchange | ABC transporter, ATP-binding protein                       |
| ben1_0494 | 2352 | unchange | SNP   | unchange | unchange | endopeptidase La                                           |
| ben1_0580 | 735  | unchange | SNP   | unchange | unchange | hypothetical protein                                       |
| ben1_0738 | 840  | unchange | SNP   | unchange | unchange | hypothetical protein                                       |

|           |      |          |          |          |          |                                              |
|-----------|------|----------|----------|----------|----------|----------------------------------------------|
| ben1_0804 | 264  | unchange | SNP      | unchange | unchange | hypothetical protein                         |
| ben1_0806 | 645  | unchange | SNP      | unchange | unchange | hypothetical protein                         |
| ben1_0837 | 900  | unchange | SNP      | unchange | unchange | putative membrane protein                    |
| ben1_0904 | 2031 | unchange | SNP      | unchange | unchange | PTS system, glucose-specific, IIBC component |
| ben1_0950 | 702  | unchange | SNP      | unchange | unchange | hypothetical protein                         |
| ben1_0200 | 462  | unchange | unchange | SNP-syn  | unchange | hypothetical protein                         |
| ben1_0357 | 807  | unchange | unchange | SNP-syn  | unchange | hypothetical protein                         |
| ben1_0457 | 1224 | unchange | unchange | SNP-syn  | unchange | prolipoprotein                               |
| ben1_0529 | 1257 | unchange | unchange | SNP-syn  | unchange | peptidase, M41 family                        |
| ben1_0591 | 921  | unchange | unchange | SNP-syn  | unchange | hypothetical protein                         |
| ben1_0642 | 624  | unchange | unchange | SNP-syn  | unchange | hypothetical protein                         |
| ben1_1081 | 777  | unchange | unchange | SNP-syn  | unchange | hypothetical protein                         |
| ben1_0005 | 1092 | unchange | unchange | Indel    | unchange | purine NTPase                                |
| ben1_0052 | 528  | unchange | unchange | Indel    | unchange | hypothetical protein                         |
| ben1_0076 | 870  | unchange | unchange | Indel    | unchange | hypothetical protein                         |
| ben1_0089 | 900  | unchange | unchange | Indel    | unchange | putative lipoprotein                         |
| ben1_0090 | 717  | unchange | unchange | Indel    | unchange | putative membrane protein                    |
| ben1_0129 | 501  | unchange | unchange | Indel    | unchange | hypothetical protein                         |
| ben1_0196 | 1323 | unchange | unchange | Indel    | unchange | DNA methylase                                |
| ben1_0201 | 522  | unchange | unchange | Indel    | unchange | hypothetical protein                         |
| ben1_0255 | 1026 | unchange | unchange | Indel    | unchange | hypothetical protein                         |
| ben1_0257 | 684  | unchange | unchange | Indel    | unchange | hypothetical protein                         |
| ben1_0278 | 1356 | unchange | unchange | Indel    | unchange | phosphopyruvate hydratase                    |
| ben1_0306 | 819  | unchange | unchange | Indel    | unchange | hypothetical protein                         |
| ben1_0308 | 657  | unchange | unchange | Indel    | unchange | prolipoprotein                               |
| ben1_0315 | 579  | unchange | unchange | Indel    | unchange | hypothetical protein                         |

|           |      |          |          |       |          |                                                        |
|-----------|------|----------|----------|-------|----------|--------------------------------------------------------|
| ben1_0317 | 693  | unchange | unchange | Indel | unchange | hypothetical protein                                   |
| ben1_0355 | 888  | unchange | unchange | Indel | unchange | hypothetical protein                                   |
| ben1_0369 | 1779 | unchange | unchange | Indel | unchange | hypothetical protein                                   |
| ben1_0389 | 510  | unchange | unchange | Indel | unchange | hypothetical protein                                   |
| ben1_0408 | 1275 | unchange | unchange | Indel | unchange | tRNA (uracil-5-)-methyltransferase Gid                 |
| ben1_0414 | 1491 | unchange | unchange | Indel | unchange | hypothetical protein                                   |
| ben1_0415 | 762  | unchange | unchange | Indel | unchange | hypothetical protein                                   |
| ben1_0455 | 378  | unchange | unchange | Indel | unchange | hypothetical protein                                   |
| ben1_0473 | 240  | unchange | unchange | Indel | unchange | hypothetical protein                                   |
| ben1_0487 | 1128 | unchange | unchange | Indel | unchange | tRNA-specific 2-thiouridylase MnmA                     |
| ben1_0510 | 777  | unchange | unchange | Indel | unchange | dinuclear metal center protein, YbgI family            |
| ben1_0624 | 939  | unchange | unchange | Indel | unchange | 1-acyl-sn-glycerol-3-phosphate acyltransferase         |
| ben1_0635 | 1221 | unchange | unchange | Indel | unchange | hypothetical protein                                   |
| ben1_0658 | 603  | unchange | unchange | Indel | unchange | heat shock protein GrpE                                |
| ben1_0718 | 816  | unchange | unchange | Indel | unchange | hypothetical protein                                   |
| ben1_0823 | 957  | unchange | unchange | Indel | unchange | glycosyltransferase                                    |
| ben1_0828 | 2349 | unchange | unchange | Indel | unchange | prolipoprotein                                         |
| ben1_0917 | 117  | unchange | unchange | Indel | unchange | hypothetical protein                                   |
| ben1_0980 | 228  | unchange | unchange | Indel | unchange | hypothetical protein                                   |
| ben1_1082 | 1419 | unchange | unchange | Indel | unchange | hypothetical protein                                   |
| ben1_1085 | 285  | unchange | unchange | Indel | unchange | hypothetical protein                                   |
| ben1_0128 | 423  | unchange | unchange | SNP   | unchange | hypothetical protein                                   |
| ben1_0426 | 369  | unchange | unchange | Indel | unchange | putative transposase InsK for insertion sequence IS150 |
| ben1_0995 | 369  | unchange | unchange | Indel | unchange | putative transposase InsK for insertion sequence IS150 |
| ben1_0363 | 543  | unchange | unchange | SNP   | unchange | IS1296QT transposase protein A                         |
| ben1_0130 | 117  | unchange | unchange | SNP   | unchange | hypothetical protein                                   |

|           |      |          |          |          |          |                                                |
|-----------|------|----------|----------|----------|----------|------------------------------------------------|
| ben1_0349 | 1833 | unchange | unchange | SNP      | unchange | ABC transporter permease                       |
| ben1_0844 | 864  | unchange | unchange | SNP      | unchange | HAD superfamily hydrolase                      |
| ben1_0014 | 1599 | unchange | unchange | unchange | unchange | immunodominant protein P72                     |
| ben1_0282 | 780  | unchange | unchange | unchange | unchange | glycerol uptake facilitator                    |
| ben1_0284 | 1164 | unchange | unchange | unchange | unchange | FAD dependent oxidoreductase                   |
| ben1_0422 | 180  | unchange | unchange | unchange | unchange | variable surface protein                       |
| ben1_0559 | 474  | unchange | unchange | unchange | unchange | glycerol ABC transporter, permease             |
| ben1_0561 | 810  | unchange | unchange | unchange | unchange | glycerol ABC transporter permease              |
| ben1_0848 | 1314 | unchange | unchange | unchange | unchange | variable surface protein (fragment), partial   |
| ben1_0849 | 1344 | unchange | unchange | unchange | unchange | variable surface protein                       |
| ben1_0855 | 1221 | unchange | unchange | unchange | unchange | variable surface protein                       |
| ben1_1077 | 1338 | unchange | unchange | unchange | unchange | prolipoprotein Q                               |
| ben1_0001 | 1353 | unchange | unchange | unchange | unchange | Chromosomal replication initiator protein DnaA |
| ben1_0002 | 1128 | unchange | unchange | unchange | unchange | DNA polymerase III subunit beta                |
| ben1_0003 | 534  | unchange | unchange | unchange | unchange | primase-like protein                           |
| ben1_0004 | 801  | unchange | unchange | unchange | unchange | dimethyladenosine transferase                  |
| ben1_0006 | 1905 | unchange | unchange | unchange | unchange | DNA gyrase, B subunit                          |
| ben1_0007 | 2505 | unchange | unchange | unchange | unchange | DNA gyrase subunit A                           |
| ben1_0008 | 978  | unchange | unchange | unchange | unchange | ribose/galactose ABC transporter permease      |
| ben1_0012 | 1530 | unchange | unchange | unchange | unchange | methionyl-tRNA synthetase                      |
| ben1_0013 | 1647 | unchange | unchange | unchange | unchange | prolipoprotein                                 |
| ben1_0017 | 987  | unchange | unchange | unchange | unchange | mannitol-1-phosphate 5-dehydrogenase           |
| ben1_0018 | 798  | unchange | unchange | unchange | unchange | RpiR family transcriptional regulator          |
| ben1_0019 | 429  | unchange | unchange | unchange | unchange | PTS system, mannitol-permease IIA component    |
| ben1_0020 | 759  | unchange | unchange | unchange | unchange | sorbitol-6-phosphate dehydrogenase             |
| ben1_0021 | 1560 | unchange | unchange | unchange | unchange | PTS system, mannitol-permease IIBC component   |

|           |      |          |          |          |          |                                           |
|-----------|------|----------|----------|----------|----------|-------------------------------------------|
| ben1_0022 | 201  | unchange | unchange | unchange | unchange | hypothetical protein                      |
| ben1_0023 | 612  | unchange | unchange | unchange | unchange | DNA recombinase recG                      |
| ben1_0024 | 492  | unchange | unchange | unchange | unchange | hypothetical protein                      |
| ben1_0025 | 228  | unchange | unchange | unchange | unchange | 30S ribosomal protein S18                 |
| ben1_0026 | 441  | unchange | unchange | unchange | unchange | single-strand binding protein             |
| ben1_0028 | 210  | unchange | unchange | unchange | unchange | cold-shock DNA-binding domain protein     |
| ben1_0029 | 600  | unchange | unchange | unchange | unchange | NAD(P)H dehydrogenase (quinone)           |
| ben1_0030 | 1035 | unchange | unchange | unchange | unchange | ABC transporter, ATP-binding protein      |
| ben1_0031 | 867  | unchange | unchange | unchange | unchange | chaperonin HslO                           |
| ben1_0032 | 3153 | unchange | unchange | unchange | unchange | GnsA/GnsB family protein                  |
| ben1_0034 | 987  | unchange | unchange | unchange | unchange | D-lactate dehydrogenase                   |
| ben1_0035 | 1125 | unchange | unchange | unchange | unchange | malate permease                           |
| ben1_0036 | 924  | unchange | unchange | unchange | unchange | hypothetical protein                      |
| ben1_0040 | 1947 | unchange | unchange | unchange | unchange | ATP-dependent metallopeptidase HflB       |
| ben1_0041 | 384  | unchange | unchange | unchange | unchange | hypothetical protein                      |
| ben1_0042 | 369  | unchange | unchange | unchange | unchange | hypothetical protein                      |
| ben1_0043 | 1206 | unchange | unchange | unchange | unchange | hypothetical protein                      |
| ben1_0044 | 828  | unchange | unchange | unchange | unchange | transcriptional regulator, RpiR family    |
| ben1_0045 | 723  | unchange | unchange | unchange | unchange | methyltransferase                         |
| ben1_0046 | 741  | unchange | unchange | unchange | unchange | DNA polymerase III subunit delta          |
| ben1_0047 | 642  | unchange | unchange | unchange | unchange | thymidylate kinase                        |
| ben1_0048 | 360  | unchange | unchange | unchange | unchange | DNA repair protein RecR                   |
| ben1_0049 | 1947 | unchange | unchange | unchange | unchange | DNA polymerase III, subunit gamma and tau |
| ben1_0050 | 444  | unchange | unchange | unchange | unchange | cytosine deaminase                        |
| ben1_0051 | 963  | unchange | unchange | unchange | unchange | GMP reductase                             |
| ben1_0054 | 969  | unchange | unchange | unchange | unchange | hypothetical protein                      |

|           |      |          |          |          |          |                                                                   |
|-----------|------|----------|----------|----------|----------|-------------------------------------------------------------------|
| ben1_0055 | 831  | unchange | unchange | unchange | unchange | hypothetical protein                                              |
| ben1_0056 | 450  | unchange | unchange | unchange | unchange | AhpC/TSA family protein                                           |
| ben1_0057 | 1743 | unchange | unchange | unchange | unchange | phosphotransferase system, EIIC                                   |
| ben1_0061 | 159  | unchange | unchange | unchange | unchange | hypothetical protein                                              |
| ben1_0062 | 231  | unchange | unchange | unchange | unchange | hypothetical protein                                              |
| ben1_0063 | 675  | unchange | unchange | unchange | unchange | prolipoprotein                                                    |
| ben1_0064 | 234  | unchange | unchange | unchange | unchange | hypothetical protein                                              |
| ben1_0065 | 582  | unchange | unchange | unchange | unchange | hypothetical protein                                              |
| ben1_0066 | 1113 | unchange | unchange | unchange | unchange | alanine dehydrogenase                                             |
| ben1_0067 | 825  | unchange | unchange | unchange | unchange | hypothetical protein                                              |
| ben1_0068 | 1269 | unchange | unchange | unchange | unchange | seryl-tRNA synthetase                                             |
| ben1_0069 | 315  | unchange | unchange | unchange | unchange | hypothetical protein                                              |
| ben1_0070 | 975  | unchange | unchange | unchange | unchange | NifR transcriptional regulator                                    |
| ben1_0071 | 1503 | unchange | unchange | unchange | unchange | lysyl-tRNA synthetase                                             |
| ben1_0074 | 309  | unchange | unchange | unchange | unchange | thioredoxin                                                       |
| ben1_0075 | 843  | unchange | unchange | unchange | unchange | HAD family hydrolase                                              |
| ben1_0077 | 675  | unchange | unchange | unchange | unchange | metallo-beta-lactamase domain protein                             |
| ben1_0079 | 753  | unchange | unchange | unchange | unchange | phosphonate ABC transporter ATP-binding protein                   |
| ben1_0080 | 1344 | unchange | unchange | unchange | unchange | putative phosphonate ABC transporter, phosphonate-binding protein |
| ben1_0081 | 1365 | unchange | unchange | unchange | unchange | asparagine--tRNA ligase                                           |
| ben1_0082 | 840  | unchange | unchange | unchange | unchange | HAD family hydrolase                                              |
| ben1_0083 | 1131 | unchange | unchange | unchange | unchange | alpha/beta hydrolase                                              |
| ben1_0085 | 750  | unchange | unchange | unchange | unchange | putative glycoprotease GCP                                        |
| ben1_0086 | 225  | unchange | unchange | unchange | unchange | hypothetical protein                                              |
| ben1_0087 | 1359 | unchange | unchange | unchange | unchange | tRNA modification GTPase TrmE                                     |
| ben1_0088 | 246  | unchange | unchange | unchange | unchange | 30S ribosomal protein S20                                         |



|           |      |          |          |          |          |                                                                  |
|-----------|------|----------|----------|----------|----------|------------------------------------------------------------------|
| ben1_0092 | 576  | unchange | unchange | unchange | unchange | proline dipeptidase                                              |
| ben1_0093 | 915  | unchange | unchange | unchange | unchange | DNA polymerase I, 5'-3' exonuclease                              |
| ben1_0094 | 522  | unchange | unchange | unchange | unchange | hypothetical protein                                             |
| ben1_0095 | 603  | unchange | unchange | unchange | unchange | hypothetical protein                                             |
| ben1_0096 | 291  | unchange | unchange | unchange | unchange | hypothetical protein                                             |
| ben1_0097 | 276  | unchange | unchange | unchange | unchange | hypothetical protein                                             |
| ben1_0098 | 558  | unchange | unchange | unchange | unchange | dephospho-COA kinase                                             |
| ben1_0101 | 216  | unchange | unchange | unchange | unchange | exodeoxyribonuclease VII small subunit                           |
| ben1_0102 | 1410 | unchange | unchange | unchange | unchange | exodeoxyribonuclease VII large subunit                           |
| ben1_0103 | 399  | unchange | unchange | unchange | unchange | transcription termination factor nusB                            |
| ben1_0104 | 1116 | unchange | unchange | unchange | unchange | putative lipoprotein                                             |
| ben1_0105 | 870  | unchange | unchange | unchange | unchange | endonuclease IV                                                  |
| ben1_0106 | 753  | unchange | unchange | unchange | unchange | riboflavin kinase/FAD synthetase                                 |
| ben1_0109 | 1149 | unchange | unchange | unchange | unchange | glycosyltransferase                                              |
| ben1_0113 | 762  | unchange | unchange | unchange | unchange | acyl-phosphate glycerol 3-phosphate acyltransferase              |
| ben1_0115 | 1227 | unchange | unchange | unchange | unchange | threonine ammonia-lyase                                          |
| ben1_0116 | 1542 | unchange | unchange | unchange | unchange | hypothetical protein                                             |
| ben1_0118 | 678  | unchange | unchange | unchange | unchange | variable prolipoprotein                                          |
| ben1_0119 | 1332 | unchange | unchange | unchange | unchange | hexosephosphate transport protein                                |
| ben1_0120 | 153  | unchange | unchange | unchange | unchange | hypothetical protein                                             |
| ben1_0121 | 789  | unchange | unchange | unchange | unchange | hypothetical protein                                             |
| ben1_0124 | 180  | unchange | unchange | unchange | unchange | IS1296UK transposase                                             |
| ben1_0126 | 1413 | unchange | unchange | unchange | unchange | transposase ISMmy1F                                              |
| ben1_0133 | 861  | unchange | unchange | unchange | unchange | IS1296MP transposase protein B                                   |
| ben1_0134 | 768  | unchange | unchange | unchange | unchange | putative glucosamine-6-phosphate deaminase                       |
| ben1_0135 | 1674 | unchange | unchange | unchange | unchange | PTS system N-acetylglucosamine-specific transporter subunit IIBC |

|           |      |          |          |          |          |                                                                   |
|-----------|------|----------|----------|----------|----------|-------------------------------------------------------------------|
| ben1_0136 | 1452 | unchange | unchange | unchange | unchange | glutamyl-tRNA synthetase                                          |
| ben1_0138 | 429  | unchange | unchange | unchange | unchange | hypothetical protein                                              |
| ben1_0140 | 963  | unchange | unchange | unchange | unchange | hypothetical protein                                              |
| ben1_0141 | 525  | unchange | unchange | unchange | unchange | hypothetical protein                                              |
| ben1_0142 | 354  | unchange | unchange | unchange | unchange | IS1296 transposase protein B                                      |
| ben1_0145 | 894  | unchange | unchange | unchange | unchange | fructose-bisphosphate aldolase class II                           |
| ben1_0147 | 180  | unchange | unchange | unchange | unchange | IS1296UK transposase                                              |
| ben1_0149 | 834  | unchange | unchange | unchange | unchange | hypothetical protein                                              |
| ben1_0150 | 366  | unchange | unchange | unchange | unchange | hypothetical protein                                              |
| ben1_0151 | 705  | unchange | unchange | unchange | unchange | glycerophosphodiester phosphodiesterase family protein            |
| ben1_0152 | 279  | unchange | unchange | unchange | unchange | 50S ribosomal protein L31                                         |
| ben1_0154 | 951  | unchange | unchange | unchange | unchange | DHHA1 domain protein                                              |
| ben1_0155 | 630  | unchange | unchange | unchange | unchange | thymidine kinase                                                  |
| ben1_0156 | 1095 | unchange | unchange | unchange | unchange | peptide chain release factor 1                                    |
| ben1_0157 | 849  | unchange | unchange | unchange | unchange | protein-(glutamine-N5) methyltransferase, release factor-specific |
| ben1_0159 | 501  | unchange | unchange | unchange | unchange | hypothetical protein                                              |
| ben1_0160 | 915  | unchange | unchange | unchange | unchange | hypothetical protein                                              |
| ben1_0161 | 708  | unchange | unchange | unchange | unchange | hypothetical protein                                              |
| ben1_0162 | 1530 | unchange | unchange | unchange | unchange | cardiolipin synthetase                                            |
| ben1_0163 | 420  | unchange | unchange | unchange | unchange | 30S ribosomal protein S12                                         |
| ben1_0164 | 468  | unchange | unchange | unchange | unchange | 30S ribosomal protein S7                                          |
| ben1_0165 | 2070 | unchange | unchange | unchange | unchange | elongation factor G                                               |
| ben1_0166 | 1188 | unchange | unchange | unchange | unchange | elongation factor Tu                                              |
| ben1_0167 | 534  | unchange | unchange | unchange | unchange | PTS system, glucose-specific IIBC component                       |
| ben1_0168 | 291  | unchange | unchange | unchange | unchange | hypothetical protein                                              |
| ben1_0169 | 540  | unchange | unchange | unchange | unchange | hypothetical protein                                              |

|           |      |          |          |          |          |                                                  |
|-----------|------|----------|----------|----------|----------|--------------------------------------------------|
| ben1_0170 | 555  | unchange | unchange | unchange | unchange | phosphotransferase system, EIIB                  |
| ben1_0171 | 2271 | unchange | unchange | unchange | unchange | alpha-xylosidase                                 |
| ben1_0172 | 1356 | unchange | unchange | unchange | unchange | leucyl aminopeptidase                            |
| ben1_0173 | 603  | unchange | unchange | unchange | unchange | hypothetical protein                             |
| ben1_0174 | 666  | unchange | unchange | unchange | unchange | methyltransferase                                |
| ben1_0178 | 426  | unchange | unchange | unchange | unchange | hypothetical protein                             |
| ben1_0179 | 513  | unchange | unchange | unchange | unchange | hypothetical protein                             |
| ben1_0180 | 195  | unchange | unchange | unchange | unchange | hypothetical protein                             |
| ben1_0181 | 165  | unchange | unchange | unchange | unchange | hypothetical protein                             |
| ben1_0186 | 597  | unchange | unchange | unchange | unchange | hypothetical protein                             |
| ben1_0187 | 1305 | unchange | unchange | unchange | unchange | prolipoprotein C                                 |
| ben1_0188 | 2691 | unchange | unchange | unchange | unchange | alanyl-tRNA synthetase                           |
| ben1_0189 | 495  | unchange | unchange | unchange | unchange | hypothetical protein                             |
| ben1_0190 | 1245 | unchange | unchange | unchange | unchange | oligopeptide ABC transporter permease            |
| ben1_0191 | 1011 | unchange | unchange | unchange | unchange | oligopeptide ABC transporter permease I          |
| ben1_0192 | 1701 | unchange | unchange | unchange | unchange | oligopeptide ABC transporter ATP-binding protein |
| ben1_0193 | 1869 | unchange | unchange | unchange | unchange | ABC transporter, ATP-binding protein             |
| ben1_0195 | 585  | unchange | unchange | unchange | unchange | restriction endonuclease                         |
| ben1_0197 | 666  | unchange | unchange | unchange | unchange | hypothetical protein                             |
| ben1_0198 | 1167 | unchange | unchange | unchange | unchange | hypothetical protein                             |
| ben1_0199 | 762  | unchange | unchange | unchange | unchange | hypothetical protein                             |
| ben1_0203 | 921  | unchange | unchange | unchange | unchange | Fic family protein                               |
| ben1_0204 | 141  | unchange | unchange | unchange | unchange | hypothetical protein                             |
| ben1_0205 | 453  | unchange | unchange | unchange | unchange | prophage protein (ps3)                           |
| ben1_0206 | 1155 | unchange | unchange | unchange | unchange | hypothetical protein                             |
| ben1_0207 | 1248 | unchange | unchange | unchange | unchange | hypothetical protein                             |

|           |      |          |          |          |          |                                                    |
|-----------|------|----------|----------|----------|----------|----------------------------------------------------|
| ben1_0209 | 396  | unchange | unchange | unchange | unchange | hypothetical protein                               |
| ben1_0210 | 669  | unchange | unchange | unchange | unchange | adenine-specific DNA methyltransferase             |
| ben1_0211 | 804  | unchange | unchange | unchange | unchange | hypothetical protein                               |
| ben1_0212 | 414  | unchange | unchange | unchange | unchange | hypothetical protein                               |
| ben1_0213 | 603  | unchange | unchange | unchange | unchange | hypothetical protein                               |
| ben1_0214 | 345  | unchange | unchange | unchange | unchange | hypothetical protein                               |
| ben1_0215 | 582  | unchange | unchange | unchange | unchange | hypothetical protein                               |
| ben1_0217 | 120  | unchange | unchange | unchange | unchange | hypothetical protein                               |
| ben1_0219 | 306  | unchange | unchange | unchange | unchange | hypothetical protein                               |
| ben1_0220 | 486  | unchange | unchange | unchange | unchange | hypothetical protein                               |
| ben1_0221 | 1293 | unchange | unchange | unchange | unchange | prolipoprotein                                     |
| ben1_0228 | 291  | unchange | unchange | unchange | unchange | transposase, IS3 family                            |
| ben1_0230 | 1830 | unchange | unchange | unchange | unchange | GTP-binding protein TypA                           |
| ben1_0231 | 765  | unchange | unchange | unchange | unchange | type II site-specific deoxyribonuclease (Sau96I-li |
| ben1_0232 | 1026 | unchange | unchange | unchange | unchange | cytosine-specific DNA-methyltransferase Sau96I     |
| ben1_0233 | 1272 | unchange | unchange | unchange | unchange | Sun family protein                                 |
| ben1_0235 | 558  | unchange | unchange | unchange | unchange | DNA methylase                                      |
| ben1_0236 | 603  | unchange | unchange | unchange | unchange | peptide deformylase                                |
| ben1_0237 | 546  | unchange | unchange | unchange | unchange | translation initiation factor IF-3                 |
| ben1_0238 | 192  | unchange | unchange | unchange | unchange | 50S ribosomal protein L35                          |
| ben1_0239 | 366  | unchange | unchange | unchange | unchange | 50S ribosomal protein L20                          |
| ben1_0240 | 1056 | unchange | unchange | unchange | unchange | ABC transporter ATP-binding protein                |
| ben1_0241 | 993  | unchange | unchange | unchange | unchange | spermidine/putrescine ABC transporter permease     |
| ben1_0243 | 159  | unchange | unchange | unchange | unchange | hypothetical protein                               |
| ben1_0244 | 660  | unchange | unchange | unchange | unchange | hypothetical protein                               |
| ben1_0245 | 678  | unchange | unchange | unchange | unchange | hypothetical protein                               |

|           |      |          |          |          |          |                                                         |
|-----------|------|----------|----------|----------|----------|---------------------------------------------------------|
| ben1_0246 | 189  | unchange | unchange | unchange | unchange | chromate ion transporter (CHR) family protein           |
| ben1_0247 | 249  | unchange | unchange | unchange | unchange | chromate transport protein                              |
| ben1_0249 | 138  | unchange | unchange | unchange | unchange | hypothetical protein                                    |
| ben1_0256 | 1356 | unchange | unchange | unchange | unchange | peptidase M17                                           |
| ben1_0258 | 1791 | unchange | unchange | unchange | unchange | oligoendopeptidase F                                    |
| ben1_0260 | 180  | unchange | unchange | unchange | unchange | IS1296UK transposase                                    |
| ben1_0261 | 861  | unchange | unchange | unchange | unchange | IS1296MP transposase protein B                          |
| ben1_0263 | 882  | unchange | unchange | unchange | unchange | hypothetical protein                                    |
| ben1_0270 | 177  | unchange | unchange | unchange | unchange | hypothetical protein                                    |
| ben1_0271 | 909  | unchange | unchange | unchange | unchange | N-acetylmuramic acid 6-phosphate etherase               |
| ben1_0272 | 621  | unchange | unchange | unchange | unchange | hypothetical protein                                    |
| ben1_0275 | 1134 | unchange | unchange | unchange | unchange | PTS system, sucrose-specific IIC component (trunca      |
| ben1_0276 | 834  | unchange | unchange | unchange | unchange | SIS domain protein                                      |
| ben1_0277 | 204  | unchange | unchange | unchange | unchange | hypothetical protein                                    |
| ben1_0280 | 432  | unchange | unchange | unchange | unchange | hypothetical protein                                    |
| ben1_0281 | 573  | unchange | unchange | unchange | unchange | hypoxanthine phosphoribosyltransferase                  |
| ben1_0283 | 1518 | unchange | unchange | unchange | unchange | glycerol kinase                                         |
| ben1_0285 | 981  | unchange | unchange | unchange | unchange | 6-phosphofructokinase                                   |
| ben1_0287 | 1920 | unchange | unchange | unchange | unchange | threonyl-tRNA synthetase                                |
| ben1_0288 | 1365 | unchange | unchange | unchange | unchange | NADH oxidase                                            |
| ben1_0289 | 1005 | unchange | unchange | unchange | unchange | lipoate protein ligase                                  |
| ben1_0290 | 1113 | unchange | unchange | unchange | unchange | pyruvate dehydrogenase (lipoamide), alpha chain         |
| ben1_0292 | 1287 | unchange | unchange | unchange | unchange | branched-chain alpha-keto acid dehydrogenase subunit E2 |
| ben1_0293 | 1788 | unchange | unchange | unchange | unchange | dihydrolipoamide dehydrogenase                          |
| ben1_0294 | 969  | unchange | unchange | unchange | unchange | phosphate acetyltransferase                             |
| ben1_0295 | 1182 | unchange | unchange | unchange | unchange | acetate kinase                                          |

|           |      |          |          |          |          |                                                     |
|-----------|------|----------|----------|----------|----------|-----------------------------------------------------|
| ben1_0296 | 1956 | unchange | unchange | unchange | unchange | prolipoprotein                                      |
| ben1_0297 | 423  | unchange | unchange | unchange | unchange | phosphopantetheine adenylyltransferase              |
| ben1_0299 | 465  | unchange | unchange | unchange | unchange | PTS system glucose-specific transporter subunit IIA |
| ben1_0300 | 627  | unchange | unchange | unchange | unchange | glycerone kinase                                    |
| ben1_0301 | 396  | unchange | unchange | unchange | unchange | dihydroxyacetone kinase, phosphotransfer subunit    |
| ben1_0302 | 627  | unchange | unchange | unchange | unchange | 30S ribosomal protein S4                            |
| ben1_0303 | 1788 | unchange | unchange | unchange | unchange | hypothetical protein                                |
| ben1_0304 | 1188 | unchange | unchange | unchange | unchange | thiamin biosynthesis protein                        |
| ben1_0305 | 1911 | unchange | unchange | unchange | unchange | hypothetical protein                                |
| ben1_0309 | 390  | unchange | unchange | unchange | unchange | hypothetical protein                                |
| ben1_0310 | 456  | unchange | unchange | unchange | unchange | hypothetical protein                                |
| ben1_0311 | 2001 | unchange | unchange | unchange | unchange | regulatory protein PfoR                             |
| ben1_0313 | 591  | unchange | unchange | unchange | unchange | ribosome biogenesis GTP-binding protein YsxC        |
| ben1_0314 | 561  | unchange | unchange | unchange | unchange | hypothetical protein                                |
| ben1_0316 | 690  | unchange | unchange | unchange | unchange | hypothetical protein                                |
| ben1_0318 | 723  | unchange | unchange | unchange | unchange | oxidoreductase                                      |
| ben1_0319 | 474  | unchange | unchange | unchange | unchange | transcription elongation factor GreA                |
| ben1_0320 | 1755 | unchange | unchange | unchange | unchange | excinuclease ABC subunit C                          |
| ben1_0323 | 1752 | unchange | unchange | unchange | unchange | hypothetical protein                                |
| ben1_0324 | 720  | unchange | unchange | unchange | unchange | oxidoreductase                                      |
| ben1_0325 | 798  | unchange | unchange | unchange | unchange | NAD(+)/NADH kinase                                  |
| ben1_0327 | 627  | unchange | unchange | unchange | unchange | hypothetical protein                                |
| ben1_0328 | 678  | unchange | unchange | unchange | unchange | ribulose-phosphate 3-epimerase                      |
| ben1_0331 | 330  | unchange | unchange | unchange | unchange | hypothetical protein                                |
| ben1_0332 | 426  | unchange | unchange | unchange | unchange | protein phosphatase                                 |
| ben1_0333 | 186  | unchange | unchange | unchange | unchange | hypothetical protein                                |

|           |      |          |          |          |          |                                     |
|-----------|------|----------|----------|----------|----------|-------------------------------------|
| ben1_0335 | 564  | unchange | unchange | unchange | unchange | hypothetical protein                |
| ben1_0337 | 1842 | unchange | unchange | unchange | unchange | hypothetical protein                |
| ben1_0338 | 123  | unchange | unchange | unchange | unchange | hypothetical protein                |
| ben1_0341 | 270  | unchange | unchange | unchange | unchange | prolipoprotein                      |
| ben1_0342 | 363  | unchange | unchange | unchange | unchange | hypothetical protein                |
| ben1_0344 | 129  | unchange | unchange | unchange | unchange | hypothetical protein                |
| ben1_0346 | 861  | unchange | unchange | unchange | unchange | hypothetical protein                |
| ben1_0347 | 1092 | unchange | unchange | unchange | unchange | hypothetical protein                |
| ben1_0348 | 705  | unchange | unchange | unchange | unchange | ABC transporter ATP-binding protein |
| ben1_0350 | 390  | unchange | unchange | unchange | unchange | hypothetical protein                |
| ben1_0351 | 201  | unchange | unchange | unchange | unchange | hypothetical protein                |
| ben1_0352 | 681  | unchange | unchange | unchange | unchange | hypothetical protein                |
| ben1_0353 | 1425 | unchange | unchange | unchange | unchange | proline--tRNA ligase                |
| ben1_0354 | 618  | unchange | unchange | unchange | unchange | ribonuclease HI                     |
| ben1_0356 | 1803 | unchange | unchange | unchange | unchange | Ribosomal back-translocase LepA     |
| ben1_0358 | 1725 | unchange | unchange | unchange | unchange | aspartyl-tRNA synthetase            |
| ben1_0360 | 354  | unchange | unchange | unchange | unchange | ribosome binding factor A           |
| ben1_0361 | 879  | unchange | unchange | unchange | unchange | tRNA pseudouridine synthase B       |
| ben1_0362 | 555  | unchange | unchange | unchange | unchange | riboflavin kinase                   |
| ben1_0364 | 861  | unchange | unchange | unchange | unchange | IS1296MP transposase protein B      |
| ben1_0367 | 870  | unchange | unchange | unchange | unchange | hypothetical protein                |
| ben1_0368 | 282  | unchange | unchange | unchange | unchange | hypothetical protein                |
| ben1_0370 | 267  | unchange | unchange | unchange | unchange | 30S ribosomal protein S15           |
| ben1_0373 | 180  | unchange | unchange | unchange | unchange | IS1296UK transposase                |
| ben1_0375 | 1863 | unchange | unchange | unchange | unchange | translation initiation factor IF-2  |
| ben1_0377 | 270  | unchange | unchange | unchange | unchange | hypothetical protein                |

|           |      |          |          |          |          |                                                  |
|-----------|------|----------|----------|----------|----------|--------------------------------------------------|
| ben1_0378 | 1755 | unchange | unchange | unchange | unchange | transcription termination factor NusA            |
| ben1_0379 | 495  | unchange | unchange | unchange | unchange | hypothetical protein                             |
| ben1_0380 | 651  | unchange | unchange | unchange | unchange | nitroreductase family protein                    |
| ben1_0383 | 1077 | unchange | unchange | unchange | unchange | peptidase, M24 family                            |
| ben1_0385 | 816  | unchange | unchange | unchange | unchange | tryptophanyl-tRNA synthetase                     |
| ben1_0386 | 870  | unchange | unchange | unchange | unchange | hypothetical protein                             |
| ben1_0392 | 165  | unchange | unchange | unchange | unchange | hypothetical protein                             |
| ben1_0393 | 123  | unchange | unchange | unchange | unchange | hypothetical protein                             |
| ben1_0394 | 471  | unchange | unchange | unchange | unchange | variable prolipoprotein                          |
| ben1_0395 | 354  | unchange | unchange | unchange | unchange | IS1296 transposase protein B                     |
| ben1_0397 | 180  | unchange | unchange | unchange | unchange | IS1296UK transposase                             |
| ben1_0399 | 306  | unchange | unchange | unchange | unchange | prolipoprotein                                   |
| ben1_0402 | 147  | unchange | unchange | unchange | unchange | hypothetical protein                             |
| ben1_0404 | 246  | unchange | unchange | unchange | unchange | hypothetical protein                             |
| ben1_0405 | 1971 | unchange | unchange | unchange | unchange | transketolase                                    |
| ben1_0406 | 153  | unchange | unchange | unchange | unchange | hypothetical protein                             |
| ben1_0407 | 735  | unchange | unchange | unchange | unchange | hypothetical protein                             |
| ben1_0409 | 309  | unchange | unchange | unchange | unchange | hypothetical protein                             |
| ben1_0410 | 420  | unchange | unchange | unchange | unchange | putative lipoprotein                             |
| ben1_0411 | 771  | unchange | unchange | unchange | unchange | hypothetical protein                             |
| ben1_0413 | 159  | unchange | unchange | unchange | unchange | hypothetical protein                             |
| ben1_0416 | 837  | unchange | unchange | unchange | unchange | hypothetical protein                             |
| ben1_0417 | 630  | unchange | unchange | unchange | unchange | hypothetical protein                             |
| ben1_0418 | 759  | unchange | unchange | unchange | unchange | pseudouridylate synthase                         |
| ben1_0420 | 714  | unchange | unchange | unchange | unchange | DNA-binding regulatory protein, YebC/PmpR family |
| ben1_0421 | 828  | unchange | unchange | unchange | unchange | hypothetical protein                             |



|           |      |          |          |          |          |                                                                    |
|-----------|------|----------|----------|----------|----------|--------------------------------------------------------------------|
| ben1_0423 | 165  | unchange | unchange | unchange | unchange | hypothetical protein                                               |
| ben1_0424 | 117  | unchange | unchange | unchange | unchange | hypothetical protein                                               |
| ben1_0425 | 345  | unchange | unchange | unchange | unchange | prolipoprotein                                                     |
| ben1_0429 | 330  | unchange | unchange | unchange | unchange | hypothetical protein                                               |
| ben1_0430 | 450  | unchange | unchange | unchange | unchange | PTS system transporter subunit IIA                                 |
| ben1_0431 | 1809 | unchange | unchange | unchange | unchange | PTS system ascorbate-specific transporter subunits IICB            |
| ben1_0432 | 657  | unchange | unchange | unchange | unchange | ribulose-phosphate 3-epimerase                                     |
| ben1_0433 | 714  | unchange | unchange | unchange | unchange | prolipoprotein                                                     |
| ben1_0436 | 912  | unchange | unchange | unchange | unchange | hypothetical protein                                               |
| ben1_0437 | 135  | unchange | unchange | unchange | unchange | hypothetical protein                                               |
| ben1_0438 | 2115 | unchange | unchange | unchange | unchange | hypothetical protein                                               |
| ben1_0441 | 561  | unchange | unchange | unchange | unchange | inorganic pyrophosphatase                                          |
| ben1_0442 | 888  | unchange | unchange | unchange | unchange | hypothetical protein                                               |
| ben1_0444 | 669  | unchange | unchange | unchange | unchange | cytidylate kinase                                                  |
| ben1_0448 | 273  | unchange | unchange | unchange | unchange | DNA-binding protein HU (HB)                                        |
| ben1_0449 | 537  | unchange | unchange | unchange | unchange | hypothetical protein                                               |
| ben1_0450 | 153  | unchange | unchange | unchange | unchange | hypothetical protein                                               |
| ben1_0452 | 180  | unchange | unchange | unchange | unchange | IS1296UK transposase                                               |
| ben1_0453 | 861  | unchange | unchange | unchange | unchange | IS1296MP transposase protein B                                     |
| ben1_0454 | 444  | unchange | unchange | unchange | unchange | recombination protein U                                            |
| ben1_0458 | 471  | unchange | unchange | unchange | unchange | competence/damage-inducible protein CinA C-terminal domain protein |
| ben1_0459 | 1038 | unchange | unchange | unchange | unchange | recombinase A                                                      |
| ben1_0460 | 1449 | unchange | unchange | unchange | unchange | 2',3'-cyclic-nucleotide=2'-phosphodiesterase                       |
| ben1_0461 | 1344 | unchange | unchange | unchange | unchange | Signal recognition particle M54 protein                            |
| ben1_0463 | 327  | unchange | unchange | unchange | unchange | 30S ribosomal protein S16                                          |
| ben1_0464 | 489  | unchange | unchange | unchange | unchange | 16S rRNA-processing protein RimM                                   |

|           |      |          |          |          |          |                                                  |
|-----------|------|----------|----------|----------|----------|--------------------------------------------------|
| ben1_0465 | 723  | unchange | unchange | unchange | unchange | tRNA (guanine-N(1)-)-methyltransferase           |
| ben1_0466 | 393  | unchange | unchange | unchange | unchange | 50S ribosomal protein L19                        |
| ben1_0467 | 951  | unchange | unchange | unchange | unchange | GTP-binding protein                              |
| ben1_0468 | 624  | unchange | unchange | unchange | unchange | ribonuclease H II                                |
| ben1_0469 | 132  | unchange | unchange | unchange | unchange | hypothetical protein                             |
| ben1_0470 | 1062 | unchange | unchange | unchange | unchange | prolipoprotein                                   |
| ben1_0471 | 261  | unchange | unchange | unchange | unchange | hypothetical protein                             |
| ben1_0472 | 303  | unchange | unchange | unchange | unchange | aspartate--tRNA ligase                           |
| ben1_0474 | 306  | unchange | unchange | unchange | unchange | hypothetical protein                             |
| ben1_0475 | 1872 | unchange | unchange | unchange | unchange | ABC transporter ATP-binding protein and permease |
| ben1_0477 | 1608 | unchange | unchange | unchange | unchange | hypothetical protein                             |
| ben1_0479 | 312  | unchange | unchange | unchange | unchange | hypothetical protein                             |
| ben1_0480 | 1302 | unchange | unchange | unchange | unchange | GTPase ObgE                                      |
| ben1_0482 | 246  | unchange | unchange | unchange | unchange | hypothetical protein                             |
| ben1_0483 | 1104 | unchange | unchange | unchange | unchange | nicotinate-nucleotide adenylyltransferase        |
| ben1_0484 | 657  | unchange | unchange | unchange | unchange | 5'-methylthioadenosine nucleosidase              |
| ben1_0485 | 645  | unchange | unchange | unchange | unchange | deoxynucleoside kinase                           |
| ben1_0488 | 618  | unchange | unchange | unchange | unchange | hypothetical protein                             |
| ben1_0490 | 954  | unchange | unchange | unchange | unchange | methionyl-tRNA formyltransferase                 |
| ben1_0491 | 555  | unchange | unchange | unchange | unchange | elongation factor P                              |
| ben1_0492 | 303  | unchange | unchange | unchange | unchange | hypothetical protein                             |
| ben1_0493 | 1287 | unchange | unchange | unchange | unchange | FKBP-type peptidylprolyl isomerase               |
| ben1_0495 | 1236 | unchange | unchange | unchange | unchange | recombination factor protein RarA                |
| ben1_0499 | 552  | unchange | unchange | unchange | unchange | ThiJ/PfpI family protein                         |
| ben1_0502 | 228  | unchange | unchange | unchange | unchange | hypothetical protein                             |
| ben1_0504 | 906  | unchange | unchange | unchange | unchange | GTP-binding protein Era                          |

|           |      |          |          |          |          |                                                    |
|-----------|------|----------|----------|----------|----------|----------------------------------------------------|
| ben1_0505 | 750  | unchange | unchange | unchange | unchange | DNA repair protein recO                            |
| ben1_0506 | 1371 | unchange | unchange | unchange | unchange | glycyl-tRNA synthetase                             |
| ben1_0507 | 1839 | unchange | unchange | unchange | unchange | DNA primase                                        |
| ben1_0511 | 1362 | unchange | unchange | unchange | unchange | ATP-dependent RNA helicase                         |
| ben1_0512 | 1515 | unchange | unchange | unchange | unchange | hypothetical protein                               |
| ben1_0514 | 513  | unchange | unchange | unchange | unchange | adenine phosphoribosyltransferase                  |
| ben1_0516 | 2889 | unchange | unchange | unchange | unchange | P115-like protein                                  |
| ben1_0517 | 255  | unchange | unchange | unchange | unchange | hypothetical protein                               |
| ben1_0518 | 453  | unchange | unchange | unchange | unchange | hypothetical protein                               |
| ben1_0520 | 1005 | unchange | unchange | unchange | unchange | glycerol-3-phosphate acyltransferase PlsX          |
| ben1_0522 | 312  | unchange | unchange | unchange | unchange | hypothetical protein                               |
| ben1_0523 | 198  | unchange | unchange | unchange | unchange | ribosomal protein L28                              |
| ben1_0524 | 444  | unchange | unchange | unchange | unchange | hypothetical protein                               |
| ben1_0526 | 2052 | unchange | unchange | unchange | unchange | phosphate ABC transporter permease                 |
| ben1_0528 | 675  | unchange | unchange | unchange | unchange | phosphate transport system regulatory protein PhoU |
| ben1_0530 | 336  | unchange | unchange | unchange | unchange | DNA-binding protein                                |
| ben1_0532 | 1164 | unchange | unchange | unchange | unchange | S-adenosylmethionine synthetase                    |
| ben1_0533 | 684  | unchange | unchange | unchange | unchange | copper homeostasis protein                         |
| ben1_0535 | 789  | unchange | unchange | unchange | unchange | tRNA (uracil-5-)-methyltransferase Gid             |
| ben1_0536 | 930  | unchange | unchange | unchange | unchange | mannose-6-phosphate isomerase                      |
| ben1_0537 | 654  | unchange | unchange | unchange | unchange | uracil-DNA glycosylase                             |
| ben1_0538 | 981  | unchange | unchange | unchange | unchange | CMP-binding-factor                                 |
| ben1_0540 | 2154 | unchange | unchange | unchange | unchange | prolipoprotein                                     |
| ben1_0541 | 2913 | unchange | unchange | unchange | unchange | hypothetical protein                               |
| ben1_0542 | 1239 | unchange | unchange | unchange | unchange | nitrogen fixation protein class-V pyridoxal-phosph |
| ben1_0544 | 564  | unchange | unchange | unchange | unchange | 5-formyltetrahydrofolate cyclo-ligase              |

|           |      |          |          |          |          |                                                   |
|-----------|------|----------|----------|----------|----------|---------------------------------------------------|
| ben1_0545 | 1575 | unchange | unchange | unchange | unchange | peptidase                                         |
| ben1_0546 | 1284 | unchange | unchange | unchange | unchange | glucose-6-phosphate isomerase                     |
| ben1_0547 | 447  | unchange | unchange | unchange | unchange | hypothetical protein                              |
| ben1_0548 | 504  | unchange | unchange | unchange | unchange | dUTP diphosphatase                                |
| ben1_0549 | 654  | unchange | unchange | unchange | unchange | rRNA methylase                                    |
| ben1_0550 | 1416 | unchange | unchange | unchange | unchange | glyceraldehyde-3-phosphate dehydrogenase          |
| ben1_0551 | 1932 | unchange | unchange | unchange | unchange | DNA topoisomerase IV subunit B                    |
| ben1_0554 | 501  | unchange | unchange | unchange | unchange | transmembrane protein permease                    |
| ben1_0555 | 123  | unchange | unchange | unchange | unchange | hypothetical protein                              |
| ben1_0556 | 891  | unchange | unchange | unchange | unchange | hypothetical protein                              |
| ben1_0564 | 336  | unchange | unchange | unchange | unchange | hypothetical protein                              |
| ben1_0565 | 141  | unchange | unchange | unchange | unchange | hypothetical protein                              |
| ben1_0566 | 1551 | unchange | unchange | unchange | unchange | surface located membrane protein                  |
| ben1_0567 | 1452 | unchange | unchange | unchange | unchange | hypothetical protein                              |
| ben1_0568 | 354  | unchange | unchange | unchange | unchange | IS1296 transposase protein B                      |
| ben1_0572 | 1179 | unchange | unchange | unchange | unchange | NADH dependent flavin oxidoreductase              |
| ben1_0573 | 1038 | unchange | unchange | unchange | unchange | lipoate-protein ligase A                          |
| ben1_0576 | 792  | unchange | unchange | unchange | unchange | triacylglycerol lipase                            |
| ben1_0577 | 801  | unchange | unchange | unchange | unchange | triacylglycerol lipase                            |
| ben1_0578 | 957  | unchange | unchange | unchange | unchange | L-lactate dehydrogenase                           |
| ben1_0581 | 585  | unchange | unchange | unchange | unchange | hypothetical protein                              |
| ben1_0584 | 540  | unchange | unchange | unchange | unchange | prolipoprotein                                    |
| ben1_0585 | 165  | unchange | unchange | unchange | unchange | 30S ribosomal protein S21                         |
| ben1_0586 | 561  | unchange | unchange | unchange | unchange | Holliday junction ATP-dependent DNA helicase RuvA |
| ben1_0587 | 924  | unchange | unchange | unchange | unchange | Holliday junction DNA helicase RuvB               |
| ben1_0590 | 582  | unchange | unchange | unchange | unchange | hypothetical protein                              |

|           |      |          |          |          |          |                                                    |
|-----------|------|----------|----------|----------|----------|----------------------------------------------------|
| ben1_0596 | 618  | unchange | unchange | unchange | unchange | uridine kinase                                     |
| ben1_0597 | 441  | unchange | unchange | unchange | unchange | hypothetical protein                               |
| ben1_0598 | 1350 | unchange | unchange | unchange | unchange | putative dipeptidase                               |
| ben1_0599 | 681  | unchange | unchange | unchange | unchange | N-acetylmannosamine-6-phosphate 2-epimerase        |
| ben1_0600 | 876  | unchange | unchange | unchange | unchange | ROK family protein                                 |
| ben1_0601 | 402  | unchange | unchange | unchange | unchange | hypothetical protein                               |
| ben1_0602 | 1704 | unchange | unchange | unchange | unchange | sodium/solute symporter family protein             |
| ben1_0603 | 888  | unchange | unchange | unchange | unchange | N-acetylneuraminase lyase                          |
| ben1_0604 | 282  | unchange | unchange | unchange | unchange | 50S ribosomal protein L27                          |
| ben1_0605 | 264  | unchange | unchange | unchange | unchange | hypothetical protein                               |
| ben1_0607 | 402  | unchange | unchange | unchange | unchange | hypothetical protein                               |
| ben1_0608 | 888  | unchange | unchange | unchange | unchange | tetrapyrrole methylase family protein              |
| ben1_0614 | 366  | unchange | unchange | unchange | unchange | hypothetical protein                               |
| ben1_0615 | 222  | unchange | unchange | unchange | unchange | hypothetical protein                               |
| ben1_0617 | 738  | unchange | unchange | unchange | unchange | transposase ISMmy1F                                |
| ben1_0619 | 693  | unchange | unchange | unchange | unchange | hypothetical protein                               |
| ben1_0620 | 717  | unchange | unchange | unchange | unchange | hypothetical protein                               |
| ben1_0621 | 273  | unchange | unchange | unchange | unchange | hypothetical protein                               |
| ben1_0622 | 1026 | unchange | unchange | unchange | unchange | hypothetical protein                               |
| ben1_0625 | 333  | unchange | unchange | unchange | unchange | holo-ACP synthase                                  |
| ben1_0626 | 171  | unchange | unchange | unchange | unchange | hypothetical protein                               |
| ben1_0627 | 483  | unchange | unchange | unchange | unchange | dCMP deaminase                                     |
| ben1_0628 | 1302 | unchange | unchange | unchange | unchange | hypothetical protein                               |
| ben1_0629 | 933  | unchange | unchange | unchange | unchange | ribosomal large subunit pseudouridylate synthase D |
| ben1_0630 | 609  | unchange | unchange | unchange | unchange | lipoprotein signal peptidase                       |
| ben1_0631 | 2748 | unchange | unchange | unchange | unchange | isoleucine--tRNA ligase                            |

|           |      |          |          |          |          |                                             |
|-----------|------|----------|----------|----------|----------|---------------------------------------------|
| ben1_0632 | 990  | unchange | unchange | unchange | unchange | hypothetical protein                        |
| ben1_0634 | 1161 | unchange | unchange | unchange | unchange | cell division protein FtsZ                  |
| ben1_0637 | 402  | unchange | unchange | unchange | unchange | cell division protein MraZ                  |
| ben1_0638 | 180  | unchange | unchange | unchange | unchange | 50S ribosomal protein L32                   |
| ben1_0639 | 519  | unchange | unchange | unchange | unchange | hypothetical protein                        |
| ben1_0644 | 1665 | unchange | unchange | unchange | unchange | arginyl-tRNA synthetase                     |
| ben1_0645 | 549  | unchange | unchange | unchange | unchange | ribosome recycling factor                   |
| ben1_0646 | 714  | unchange | unchange | unchange | unchange | UMP kinase                                  |
| ben1_0649 | 150  | unchange | unchange | unchange | unchange | hypothetical protein                        |
| ben1_0650 | 417  | unchange | unchange | unchange | unchange | hypothetical protein                        |
| ben1_0651 | 156  | unchange | unchange | unchange | unchange | hypothetical protein                        |
| ben1_0652 | 207  | unchange | unchange | unchange | unchange | hypothetical protein                        |
| ben1_0653 | 606  | unchange | unchange | unchange | unchange | hypothetical protein                        |
| ben1_0654 | 888  | unchange | unchange | unchange | unchange | elongation factor Ts                        |
| ben1_0655 | 879  | unchange | unchange | unchange | unchange | ribosomal protein S2                        |
| ben1_0656 | 1119 | unchange | unchange | unchange | unchange | molecular chaperone DnaJ                    |
| ben1_0659 | 1023 | unchange | unchange | unchange | unchange | heat inducible transcription repressor HrcA |
| ben1_0660 | 2142 | unchange | unchange | unchange | unchange | ATP dependent protease ClpB                 |
| ben1_0661 | 867  | unchange | unchange | unchange | unchange | Cof-like hydrolase                          |
| ben1_0662 | 546  | unchange | unchange | unchange | unchange | rRNA methylase                              |
| ben1_0663 | 603  | unchange | unchange | unchange | unchange | Ham1 family protein                         |
| ben1_0664 | 2499 | unchange | unchange | unchange | unchange | hypothetical protein                        |
| ben1_0665 | 1380 | unchange | unchange | unchange | unchange | ATP synthase F0F1 subunit beta              |
| ben1_0666 | 1548 | unchange | unchange | unchange | unchange | ATP synthase F1, alpha subunit              |
| ben1_0720 | 204  | unchange | unchange | unchange | unchange | hypothetical protein                        |
| ben1_0721 | 1833 | unchange | unchange | unchange | unchange | hypothetical protein                        |

|           |      |          |          |          |          |                                                  |
|-----------|------|----------|----------|----------|----------|--------------------------------------------------|
| ben1_0722 | 945  | unchange | unchange | unchange | unchange | hypothetical protein                             |
| ben1_0725 | 306  | unchange | unchange | unchange | unchange | hypothetical protein                             |
| ben1_0726 | 2256 | unchange | unchange | unchange | unchange | hypothetical protein                             |
| ben1_0728 | 1215 | unchange | unchange | unchange | unchange | phosphoglycerate kinase                          |
| ben1_0729 | 1017 | unchange | unchange | unchange | unchange | glyceraldehyde-3-phosphate dehydrogenase, type I |
| ben1_0730 | 939  | unchange | unchange | unchange | unchange | primosomal protein                               |
| ben1_0732 | 825  | unchange | unchange | unchange | unchange | formamidopyrimidine-DNA glycosylase              |
| ben1_0735 | 1245 | unchange | unchange | unchange | unchange | tyrosine-tRNA ligase                             |
| ben1_0736 | 1062 | unchange | unchange | unchange | unchange | nicotinate phosphoribosyltransferase             |
| ben1_0737 | 609  | unchange | unchange | unchange | unchange | phenylalanine-tRNA ligase                        |
| ben1_0739 | 852  | unchange | unchange | unchange | unchange | hypothetical protein                             |
| ben1_0741 | 222  | unchange | unchange | unchange | unchange | hypothetical protein                             |
| ben1_0742 | 363  | unchange | unchange | unchange | unchange | prolipoprotein                                   |
| ben1_0744 | 261  | unchange | unchange | unchange | unchange | hypothetical protein                             |
| ben1_0745 | 1896 | unchange | unchange | unchange | unchange | endopeptidase O                                  |
| ben1_0746 | 123  | unchange | unchange | unchange | unchange | hypothetical protein                             |
| ben1_0749 | 336  | unchange | unchange | unchange | unchange | hypothetical protein                             |
| ben1_0750 | 645  | unchange | unchange | unchange | unchange | IS1138 transposase                               |
| ben1_0751 | 933  | unchange | unchange | unchange | unchange | carbamate kinase                                 |
| ben1_0752 | 1095 | unchange | unchange | unchange | unchange | agmatine deiminase                               |
| ben1_0753 | 549  | unchange | unchange | unchange | unchange | amino acid permease                              |
| ben1_0754 | 894  | unchange | unchange | unchange | unchange | amino acid transporter                           |
| ben1_0755 | 1098 | unchange | unchange | unchange | unchange | ornithine carbamoyltransferase                   |
| ben1_0756 | 888  | unchange | unchange | unchange | unchange | ABC transporter ATP-binding protein              |
| ben1_0757 | 483  | unchange | unchange | unchange | unchange | hypothetical protein                             |
| ben1_0758 | 288  | unchange | unchange | unchange | unchange | hypothetical protein                             |

|           |      |          |          |          |          |                                           |
|-----------|------|----------|----------|----------|----------|-------------------------------------------|
| ben1_0759 | 480  | unchange | unchange | unchange | unchange | hypothetical protein                      |
| ben1_0761 | 2415 | unchange | unchange | unchange | unchange | leucine--tRNA ligase                      |
| ben1_0763 | 399  | unchange | unchange | unchange | unchange | 30S ribosomal protein S9                  |
| ben1_0764 | 456  | unchange | unchange | unchange | unchange | 50S ribosomal protein L13                 |
| ben1_0765 | 4020 | unchange | unchange | unchange | unchange | permease                                  |
| ben1_0767 | 1011 | unchange | unchange | unchange | unchange | ABC transporter permease                  |
| ben1_0768 | 912  | unchange | unchange | unchange | unchange | cobalt transporter ATP-binding subunit    |
| ben1_0771 | 360  | unchange | unchange | unchange | unchange | 50S ribosomal protein L17                 |
| ben1_0772 | 954  | unchange | unchange | unchange | unchange | DNA-directed RNA polymerase subunit alpha |
| ben1_0773 | 390  | unchange | unchange | unchange | unchange | 30S ribosomal protein S11                 |
| ben1_0774 | 366  | unchange | unchange | unchange | unchange | 30S ribosomal protein S13                 |
| ben1_0775 | 114  | unchange | unchange | unchange | unchange | 50S ribosomal protein L36                 |
| ben1_0776 | 225  | unchange | unchange | unchange | unchange | translation initiation factor IF-1        |
| ben1_0777 | 756  | unchange | unchange | unchange | unchange | methionyl aminopeptidase                  |
| ben1_0778 | 642  | unchange | unchange | unchange | unchange | adenylate kinase                          |
| ben1_0779 | 1449 | unchange | unchange | unchange | unchange | preprotein translocase subunit SecY       |
| ben1_0780 | 438  | unchange | unchange | unchange | unchange | 50S ribosomal protein L15                 |
| ben1_0781 | 765  | unchange | unchange | unchange | unchange | 30S ribosomal protein S5                  |
| ben1_0782 | 351  | unchange | unchange | unchange | unchange | 50S ribosomal protein L18                 |
| ben1_0783 | 543  | unchange | unchange | unchange | unchange | 50S ribosomal protein L6                  |
| ben1_0784 | 390  | unchange | unchange | unchange | unchange | 30S ribosomal protein S8                  |
| ben1_0785 | 186  | unchange | unchange | unchange | unchange | 30S ribosomal protein S14                 |
| ben1_0786 | 543  | unchange | unchange | unchange | unchange | 50S ribosomal protein L5                  |
| ben1_0787 | 327  | unchange | unchange | unchange | unchange | 50S ribosomal protein L24                 |
| ben1_0788 | 369  | unchange | unchange | unchange | unchange | 50S ribosomal protein L14                 |
| ben1_0789 | 258  | unchange | unchange | unchange | unchange | 30S ribosomal protein S17                 |



|           |      |          |          |          |          |                                                                              |
|-----------|------|----------|----------|----------|----------|------------------------------------------------------------------------------|
| ben1_0790 | 417  | unchange | unchange | unchange | unchange | 50S ribosomal protein L29                                                    |
| ben1_0791 | 414  | unchange | unchange | unchange | unchange | 50S ribosomal protein L16                                                    |
| ben1_0792 | 702  | unchange | unchange | unchange | unchange | 30S ribosomal protein S3                                                     |
| ben1_0793 | 336  | unchange | unchange | unchange | unchange | 50S ribosomal protein L22                                                    |
| ben1_0794 | 267  | unchange | unchange | unchange | unchange | 30S ribosomal protein S19                                                    |
| ben1_0795 | 849  | unchange | unchange | unchange | unchange | 50S ribosomal protein L2                                                     |
| ben1_0796 | 285  | unchange | unchange | unchange | unchange | 50S ribosomal protein L23                                                    |
| ben1_0797 | 627  | unchange | unchange | unchange | unchange | 50S ribosomal protein L4                                                     |
| ben1_0798 | 672  | unchange | unchange | unchange | unchange | 50S ribosomal protein L3                                                     |
| ben1_0799 | 309  | unchange | unchange | unchange | unchange | 30S ribosomal protein S10                                                    |
| ben1_0800 | 999  | unchange | unchange | unchange | unchange | dihydroxyacetone kinase subunit DhaK                                         |
| ben1_0801 | 1599 | unchange | unchange | unchange | unchange | putative alpha,alpha-phosphotrehalase                                        |
| ben1_0802 | 1548 | unchange | unchange | unchange | unchange | phosphotransferase system, EIIC                                              |
| ben1_0803 | 987  | unchange | unchange | unchange | unchange | hypothetical protein                                                         |
| ben1_0805 | 168  | unchange | unchange | unchange | unchange | hypothetical protein                                                         |
| ben1_0807 | 549  | unchange | unchange | unchange | unchange | hypothetical protein                                                         |
| ben1_0808 | 261  | unchange | unchange | unchange | unchange | hypothetical protein                                                         |
| ben1_0810 | 867  | unchange | unchange | unchange | unchange | tetrahydrofolate dehydrogenase/cyclohydrolase, NAD(P)-binding domain protein |
| ben1_0812 | 726  | unchange | unchange | unchange | unchange | hypothetical protein                                                         |
| ben1_0813 | 1440 | unchange | unchange | unchange | unchange | aspartyl/glutamyl-tRNA amidotransferase subunit B                            |
| ben1_0814 | 1458 | unchange | unchange | unchange | unchange | aspartyl/glutamyl-tRNA amidotransferase subunit A                            |
| ben1_0815 | 297  | unchange | unchange | unchange | unchange | glutamyl-tRNA(Gln) amidotransferase subunit C                                |
| ben1_0817 | 2022 | unchange | unchange | unchange | unchange | hypothetical protein                                                         |
| ben1_0819 | 969  | unchange | unchange | unchange | unchange | hypothetical protein                                                         |
| ben1_0820 | 270  | unchange | unchange | unchange | unchange | phosphocarrier protein HPr                                                   |
| ben1_0821 | 2169 | unchange | unchange | unchange | unchange | ATP-dependent DNA helicase                                                   |

|           |      |          |          |          |          |                                                                       |
|-----------|------|----------|----------|----------|----------|-----------------------------------------------------------------------|
| ben1_0824 | 318  | unchange | unchange | unchange | unchange | hypothetical protein                                                  |
| ben1_0825 | 534  | unchange | unchange | unchange | unchange | hypothetical protein                                                  |
| ben1_0826 | 930  | unchange | unchange | unchange | unchange | peptide methionine sulfoxide reductase                                |
| ben1_0827 | 2166 | unchange | unchange | unchange | unchange | prolipoprotein                                                        |
| ben1_0829 | 903  | unchange | unchange | unchange | unchange | hypothetical protein                                                  |
| ben1_0831 | 1116 | unchange | unchange | unchange | unchange | hypothetical protein                                                  |
| ben1_0832 | 579  | unchange | unchange | unchange | unchange | hypothetical protein                                                  |
| ben1_0833 | 840  | unchange | unchange | unchange | unchange | C5 methylase (MAV1 virus-like)                                        |
| ben1_0836 | 1893 | unchange | unchange | unchange | unchange | putative lipoprotein                                                  |
| ben1_0839 | 153  | unchange | unchange | unchange | unchange | transposase, IS4 family                                               |
| ben1_0842 | 750  | unchange | unchange | unchange | unchange | alkylphosphonate ABC transporter ATP-binding protein                  |
| ben1_0843 | 1473 | unchange | unchange | unchange | unchange | alkylphosphonate ABC transporter substrate-binding protein            |
| ben1_0845 | 1191 | unchange | unchange | unchange | unchange | aminotransferase                                                      |
| ben1_0846 | 402  | unchange | unchange | unchange | unchange | translation initiation inhibitor                                      |
| ben1_0857 | 735  | unchange | unchange | unchange | unchange | glucosamine-6-phosphate deaminase                                     |
| ben1_0860 | 747  | unchange | unchange | unchange | unchange | triosephosphate isomerase                                             |
| ben1_0861 | 837  | unchange | unchange | unchange | unchange | HAD hydrolase, family IIB                                             |
| ben1_0863 | 609  | unchange | unchange | unchange | unchange | hypothetical protein                                                  |
| ben1_0864 | 1002 | unchange | unchange | unchange | unchange | hypothetical protein                                                  |
| ben1_0865 | 669  | unchange | unchange | unchange | unchange | deoxyribose-phosphate aldolase                                        |
| ben1_0866 | 1677 | unchange | unchange | unchange | unchange | phosphoglucomutase or phosphomannomutase                              |
| ben1_0867 | 1314 | unchange | unchange | unchange | unchange | putative pyrimidine-nucleoside phosphorylase                          |
| ben1_0868 | 2037 | unchange | unchange | unchange | unchange | phosphoenolpyruvate-dependent sugar phosphotransferase system, EIIA 2 |
| ben1_0869 | 936  | unchange | unchange | unchange | unchange | 1-phosphofructokinase                                                 |
| ben1_0870 | 699  | unchange | unchange | unchange | unchange | transcription repressor of fructose operon                            |
| ben1_0871 | 981  | unchange | unchange | unchange | unchange | hypothetical protein                                                  |

|           |      |          |          |          |          |                                                      |
|-----------|------|----------|----------|----------|----------|------------------------------------------------------|
| ben1_0872 | 654  | unchange | unchange | unchange | unchange | purine nucleoside phosphorylase                      |
| ben1_0873 | 465  | unchange | unchange | unchange | unchange | transposase IS1296EH (ORFA)                          |
| ben1_0875 | 681  | unchange | unchange | unchange | unchange | lysophospholipase                                    |
| ben1_0876 | 573  | unchange | unchange | unchange | unchange | cell filamentation protein Fic-like protein          |
| ben1_0877 | 1086 | unchange | unchange | unchange | unchange | hypothetical protein                                 |
| ben1_0879 | 453  | unchange | unchange | unchange | unchange | ROK family sugar kinase                              |
| ben1_0881 | 459  | unchange | unchange | unchange | unchange | PTS system fructose-specific transporter subunit IIA |
| ben1_0883 | 180  | unchange | unchange | unchange | unchange | IS1296UK transposase                                 |
| ben1_0884 | 861  | unchange | unchange | unchange | unchange | IS1296MP transposase protein B                       |
| ben1_0886 | 1842 | unchange | unchange | unchange | unchange | phosphotransferase system, EIIC                      |
| ben1_0887 | 774  | unchange | unchange | unchange | unchange | variable prolipoprotein                              |
| ben1_0888 | 552  | unchange | unchange | unchange | unchange | hypoxanthine phosphoribosyltransferase               |
| ben1_0889 | 1299 | unchange | unchange | unchange | unchange | adenylosuccinate lyase                               |
| ben1_0890 | 1299 | unchange | unchange | unchange | unchange | adenylosuccinate synthetase                          |
| ben1_0892 | 180  | unchange | unchange | unchange | unchange | IS1296UK transposase                                 |
| ben1_0893 | 861  | unchange | unchange | unchange | unchange | IS1296MP transposase protein B                       |
| ben1_0895 | 474  | unchange | unchange | unchange | unchange | ribonucleotide reductase stimulatory protein         |
| ben1_0896 | 1020 | unchange | unchange | unchange | unchange | ribonucleotide-diphosphate reductase subunit beta    |
| ben1_0897 | 285  | unchange | unchange | unchange | unchange | preprotein translocase subunit SecG                  |
| ben1_0898 | 2115 | unchange | unchange | unchange | unchange | ribonuclease R                                       |
| ben1_0899 | 447  | unchange | unchange | unchange | unchange | SsrA-binding protein                                 |
| ben1_0900 | 483  | unchange | unchange | unchange | unchange | hypothetical protein                                 |
| ben1_0903 | 252  | unchange | unchange | unchange | unchange | hypothetical protein                                 |
| ben1_0905 | 975  | unchange | unchange | unchange | unchange | hypothetical protein                                 |
| ben1_0906 | 237  | unchange | unchange | unchange | unchange | hypothetical protein                                 |
| ben1_0907 | 729  | unchange | unchange | unchange | unchange | glucokinase                                          |

|           |      |          |          |          |          |                                                                    |
|-----------|------|----------|----------|----------|----------|--------------------------------------------------------------------|
| ben1_0909 | 324  | unchange | unchange | unchange | unchange | hypothetical protein                                               |
| ben1_0911 | 246  | unchange | unchange | unchange | unchange | hypothetical protein                                               |
| ben1_0920 | 324  | unchange | unchange | unchange | unchange | hypothetical protein                                               |
| ben1_0922 | 246  | unchange | unchange | unchange | unchange | hypothetical protein                                               |
| ben1_0926 | 300  | unchange | unchange | unchange | unchange | ATP synthase subunit epsilon                                       |
| ben1_0927 | 1428 | unchange | unchange | unchange | unchange | ATP synthase F1, beta subunit                                      |
| ben1_0928 | 843  | unchange | unchange | unchange | unchange | ATP synthase F1, gamma subunit                                     |
| ben1_0930 | 546  | unchange | unchange | unchange | unchange | ATP synthase F0F1 subunit delta                                    |
| ben1_0932 | 306  | unchange | unchange | unchange | unchange | ATP synthase subunit C                                             |
| ben1_0933 | 864  | unchange | unchange | unchange | unchange | ATP synthase subunit A                                             |
| ben1_0934 | 204  | unchange | unchange | unchange | unchange | hypothetical protein                                               |
| ben1_0935 | 624  | unchange | unchange | unchange | unchange | uracil phosphoribosyltransferase                                   |
| ben1_0936 | 1242 | unchange | unchange | unchange | unchange | serine hydroxymethyltransferase                                    |
| ben1_0937 | 444  | unchange | unchange | unchange | unchange | ribose 5-phosphate isomerase, RpiB                                 |
| ben1_0938 | 297  | unchange | unchange | unchange | unchange | hypothetical protein                                               |
| ben1_0941 | 180  | unchange | unchange | unchange | unchange | IS1296UK transposase                                               |
| ben1_0942 | 861  | unchange | unchange | unchange | unchange | IS1296MP transposase protein B                                     |
| ben1_0943 | 525  | unchange | unchange | unchange | unchange | hypothetical protein                                               |
| ben1_0944 | 963  | unchange | unchange | unchange | unchange | hypothetical protein                                               |
| ben1_0946 | 1407 | unchange | unchange | unchange | unchange | putative membrane protein                                          |
| ben1_0951 | 2733 | unchange | unchange | unchange | unchange | Mg <sup>2+</sup> transport ATPase, P-type 1                        |
| ben1_0954 | 1581 | unchange | unchange | unchange | unchange | amino acid permease                                                |
| ben1_0955 | 597  | unchange | unchange | unchange | unchange | CDP-diacylglycerol--glycerol-3-phosphate 3-phosphatidyltransferase |
| ben1_0956 | 414  | unchange | unchange | unchange | unchange | glucose-inhibited division protein B                               |
| ben1_0957 | 234  | unchange | unchange | unchange | unchange | 16S rRNA methyltransferase                                         |
| ben1_0958 | 201  | unchange | unchange | unchange | unchange | hypothetical protein                                               |

|           |      |          |          |          |          |                                           |
|-----------|------|----------|----------|----------|----------|-------------------------------------------|
| ben1_0960 | 708  | unchange | unchange | unchange | unchange | hypothetical protein                      |
| ben1_0961 | 1767 | unchange | unchange | unchange | unchange | C4-dicarboxylate anaerobic carrier        |
| ben1_0964 | 291  | unchange | unchange | unchange | unchange | hypothetical protein                      |
| ben1_0965 | 1464 | unchange | unchange | unchange | unchange | membrane family protein                   |
| ben1_0969 | 831  | unchange | unchange | unchange | unchange | hypothetical protein                      |
| ben1_0970 | 888  | unchange | unchange | unchange | unchange | putative lipoprotein                      |
| ben1_0971 | 486  | unchange | unchange | unchange | unchange | hypothetical protein                      |
| ben1_0972 | 705  | unchange | unchange | unchange | unchange | ABC transporter, ATP-binding protein      |
| ben1_0973 | 375  | unchange | unchange | unchange | unchange | hypothetical protein                      |
| ben1_0974 | 135  | unchange | unchange | unchange | unchange | hypothetical protein                      |
| ben1_0975 | 141  | unchange | unchange | unchange | unchange | hypothetical protein                      |
| ben1_0976 | 222  | unchange | unchange | unchange | unchange | hypothetical protein                      |
| ben1_0977 | 1932 | unchange | unchange | unchange | unchange | DNA topoisomerase I                       |
| ben1_0982 | 354  | unchange | unchange | unchange | unchange | hypothetical protein                      |
| ben1_0984 | 681  | unchange | unchange | unchange | unchange | prolipoprotein diacylglyceryl transferase |
| ben1_0985 | 513  | unchange | unchange | unchange | unchange | hypothetical protein                      |
| ben1_0987 | 1581 | unchange | unchange | unchange | unchange | prolipoprotein diacylglyceryl transferase |
| ben1_0989 | 675  | unchange | unchange | unchange | unchange | putative membrane protein                 |
| ben1_0990 | 1110 | unchange | unchange | unchange | unchange | dihydrofolate:folylpolyglutamate synthase |
| ben1_0991 | 2841 | unchange | unchange | unchange | unchange | excinuclease ABC, A subunit               |
| ben1_0992 | 1998 | unchange | unchange | unchange | unchange | excinuclease ABC, B subunit               |
| ben1_0999 | 798  | unchange | unchange | unchange | unchange | hydrolase, TatD family                    |
| ben1_1000 | 204  | unchange | unchange | unchange | unchange | hypothetical protein                      |
| ben1_1001 | 939  | unchange | unchange | unchange | unchange | hypothetical protein                      |
| ben1_1002 | 660  | unchange | unchange | unchange | unchange | DNA (cytosine-5-)-methyltransferase       |
| ben1_1004 | 1035 | unchange | unchange | unchange | unchange | ribose-phosphate diphosphokinase          |

|           |      |          |          |          |          |                                                           |
|-----------|------|----------|----------|----------|----------|-----------------------------------------------------------|
| ben1_1005 | 150  | unchange | unchange | unchange | unchange | hypothetical protein                                      |
| ben1_1006 | 561  | unchange | unchange | unchange | unchange | peptidyl-tRNA hydrolase                                   |
| ben1_1007 | 462  | unchange | unchange | unchange | unchange | 50S ribosomal protein L9                                  |
| ben1_1009 | 1302 | unchange | unchange | unchange | unchange | prolipoprotein                                            |
| ben1_1010 | 927  | unchange | unchange | unchange | unchange | putative membrane protein                                 |
| ben1_1011 | 1326 | unchange | unchange | unchange | unchange | cysteinyl-tRNA synthetase                                 |
| ben1_1012 | 735  | unchange | unchange | unchange | unchange | rRNA methylase                                            |
| ben1_1013 | 324  | unchange | unchange | unchange | unchange | preprotein translocase, SecE subunit family protein       |
| ben1_1014 | 642  | unchange | unchange | unchange | unchange | NusG family protein                                       |
| ben1_1016 | 2958 | unchange | unchange | unchange | unchange | oligopeptide ABC transporter, substrate-binding component |
| ben1_1017 | 1074 | unchange | unchange | unchange | unchange | oligopeptide ABC transporter permease                     |
| ben1_1018 | 1011 | unchange | unchange | unchange | unchange | ABC transporter permease                                  |
| ben1_1019 | 1446 | unchange | unchange | unchange | unchange | ABC transporter, ATP-binding protein                      |
| ben1_1022 | 927  | unchange | unchange | unchange | unchange | UDP-galactopuranose mutase                                |
| ben1_1023 | 1005 | unchange | unchange | unchange | unchange | UDP-glucose 4-epimerase                                   |
| ben1_1025 | 1149 | unchange | unchange | unchange | unchange | glycosyltransferase                                       |
| ben1_1030 | 927  | unchange | unchange | unchange | unchange | UDP-galactopuranose mutase                                |
| ben1_1031 | 1005 | unchange | unchange | unchange | unchange | UDP-glucose 4-epimerase                                   |
| ben1_1033 | 1149 | unchange | unchange | unchange | unchange | glycosyltransferase                                       |
| ben1_1038 | 927  | unchange | unchange | unchange | unchange | UDP-galactopuranose mutase                                |
| ben1_1039 | 1005 | unchange | unchange | unchange | unchange | UDP-glucose 4-epimerase                                   |
| ben1_1041 | 1149 | unchange | unchange | unchange | unchange | glycosyltransferase                                       |
| ben1_1048 | 1173 | unchange | unchange | unchange | unchange | glycosyltransferase                                       |
| ben1_1049 | 429  | unchange | unchange | unchange | unchange | 50S ribosomal protein L11                                 |
| ben1_1050 | 681  | unchange | unchange | unchange | unchange | ribosomal protein L1                                      |
| ben1_1051 | 162  | unchange | unchange | unchange | unchange | hypothetical protein                                      |

|           |      |          |          |          |          |                                                                  |
|-----------|------|----------|----------|----------|----------|------------------------------------------------------------------|
| ben1_1052 | 963  | unchange | unchange | unchange | unchange | transglutaminase                                                 |
| ben1_1053 | 363  | unchange | unchange | unchange | unchange | hypothetical protein                                             |
| ben1_1054 | 261  | unchange | unchange | unchange | unchange | hypothetical protein                                             |
| ben1_1055 | 186  | unchange | unchange | unchange | unchange | transposase domain protein                                       |
| ben1_1057 | 174  | unchange | unchange | unchange | unchange | hypothetical protein                                             |
| ben1_1058 | 183  | unchange | unchange | unchange | unchange | hypothetical protein                                             |
| ben1_1060 | 498  | unchange | unchange | unchange | unchange | 50S ribosomal protein L10                                        |
| ben1_1061 | 369  | unchange | unchange | unchange | unchange | 50S ribosomal protein L7                                         |
| ben1_1062 | 1176 | unchange | unchange | unchange | unchange | hypothetical protein                                             |
| ben1_1064 | 3768 | unchange | unchange | unchange | unchange | DNA-directed RNA polymerase, beta' subunit                       |
| ben1_1065 | 462  | unchange | unchange | unchange | unchange | integrase core domain protein                                    |
| ben1_1068 | 171  | unchange | unchange | unchange | unchange | hypothetical protein                                             |
| ben1_1069 | 258  | unchange | unchange | unchange | unchange | hypothetical protein                                             |
| ben1_1070 | 150  | unchange | unchange | unchange | unchange | hypothetical protein                                             |
| ben1_1071 | 981  | unchange | unchange | unchange | unchange | asparagine synthetase AsnA                                       |
| ben1_1072 | 762  | unchange | unchange | unchange | unchange | hypothetical protein                                             |
| ben1_1073 | 1890 | unchange | unchange | unchange | unchange | tRNA uridine 5-carboxymethylaminomethyl modification enzyme GidA |
| ben1_1074 | 1575 | unchange | unchange | unchange | unchange | proton/glutamate symporter                                       |
| ben1_1075 | 1344 | unchange | unchange | unchange | unchange | NADH oxidase                                                     |
| ben1_1076 | 501  | unchange | unchange | unchange | unchange | pyrazinamidase/nicotinamidase                                    |
| ben1_1078 | 435  | unchange | unchange | unchange | unchange | hypothetical protein                                             |
| ben1_1080 | 294  | unchange | unchange | unchange | unchange | hypothetical protein                                             |
| ben1_1083 | 444  | unchange | unchange | unchange | unchange | hypothetical protein                                             |
| ben1_1091 | 273  | unchange | unchange | unchange | unchange | hypothetical protein                                             |
| ben1_1096 | 2241 | unchange | unchange | unchange | unchange | peptidase families S8 and S53                                    |
| ben1_1097 | 1050 | unchange | unchange | unchange | unchange | ATPase AAA                                                       |

|           |      |          |          |          |          |                           |
|-----------|------|----------|----------|----------|----------|---------------------------|
| ben1_1098 | 1158 | unchange | unchange | unchange | unchange | prolipoprotein            |
| ben1_1099 | 717  | unchange | unchange | unchange | unchange | LICA protein              |
| ben1_1100 | 795  | unchange | unchange | unchange | unchange | hypothetical protein      |
| ben1_1101 | 1191 | unchange | unchange | unchange | unchange | membrane protein OxaA     |
| ben1_1103 | 135  | unchange | unchange | unchange | unchange | 50S ribosomal protein L34 |

---



**Supplementary Table 11. Enrichment analysis of variated genes from Ben50 to Ben468**

| GO-ID         | Term                                                            | Category | P-Value  | Test | Ref | notAnnotTest | notAnnotRef |
|---------------|-----------------------------------------------------------------|----------|----------|------|-----|--------------|-------------|
| <b>Ben50</b>  |                                                                 |          |          |      |     |              |             |
| GO:0016757    | transferase activity, transferring glycosyl groups              | F        | 4.57E-03 | 5    | 21  | 32           | 766         |
| GO:0016772    | transferase activity, transferring phosphorus-containing groups | F        | 3.77E-02 | 7    | 66  | 30           | 721         |
| GO:0004871    | signal transducer activity                                      | F        | 4.49E-02 | 1    | 0   | 36           | 787         |
| <b>Ben181</b> |                                                                 |          |          |      |     |              |             |
| GO:0016887    | ATPase activity                                                 | F        | 1.33E-02 | 12   | 35  | 96           | 681         |
| GO:0042254    | ribosome biogenesis                                             | P        | 4.68E-02 | 5    | 11  | 103          | 705         |
| <b>Ben326</b> |                                                                 |          |          |      |     |              |             |
| GO:0016779    | nucleotidyltransferase activity                                 | F        | 4.76E-03 | 7    | 14  | 83           | 720         |
| GO:0016887    | ATPase activity                                                 | F        | 2.45E-02 | 10   | 37  | 80           | 697         |
| GO:0005975    | carbohydrate metabolic process                                  | P        | 4.68E-02 | 9    | 36  | 81           | 698         |
| <b>Ben468</b> |                                                                 |          |          |      |     |              |             |
| GO:0016887    | ATPase activity                                                 | F        | 2.13E-02 | 8    | 39  | 55           | 722         |
| GO:0016301    | kinase activity                                                 | F        | 4.15E-02 | 8    | 45  | 55           | 716         |
| GO:0005886    | plasma membrane                                                 | C        | 4.41E-02 | 12   | 82  | 51           | 679         |
| GO:0005975    | carbohydrate metabolic process                                  | P        | 4.83E-02 | 7    | 38  | 56           | 723         |

**Supplementary Table 12. SNPs occurred in CDS in Ben50 relative to Ben1**

| <b>Ben1 Gene</b> | <b>Gene start</b> | <b>Gene End</b> | <b>SNP location</b> | <b>SNPcoord in Ben1</b> | <b>Ben1 base</b> | <b>Ben50 base</b> | <b>Ben1 codon</b> | <b>Ben50 codon</b> | <b>SNP Type</b> | <b>Annotation</b>                        | <b>Change Back in Ben181</b> |
|------------------|-------------------|-----------------|---------------------|-------------------------|------------------|-------------------|-------------------|--------------------|-----------------|------------------------------------------|------------------------------|
| ben1_0015        | 23001             | 22141           | 531                 | 22471                   | A                | C                 | AAT->N            | AAG->K             | non-synonymous  | IS1296SQ transposase protein B           |                              |
| ben1_0015        | 23001             | 22141           | 172                 | 22830                   | A                | G                 | TAT->Y            | CAT->H             | non-synonymous  | IS1296SQ transposase protein B           | yes                          |
| ben1_0016        | 23189             | 23010           | 165                 | 23025                   | T                | C                 | AGA->R            | AGG->R             | synonymous      | IS1296MP transposase protein A           |                              |
| ben1_0016        | 23189             | 23010           | 109                 | 23081                   | T                | C                 | AAG->K            | GAG->E             | non-synonymous  | IS1296MP transposase protein A           |                              |
| ben1_0033        | 37990             | 43359           | 2918                | 40907                   | C                | T                 | TCA->S            | TTA->L             | non-synonymous  | efflux ABC transporter, permease protein |                              |
| ben1_0038        | 47769             | 49289           | 483                 | 48251                   | T                | A                 | AAT->N            | AAA->K             | non-synonymous  | IS1634AC transposase                     | yes                          |
| ben1_0038        | 47769             | 49289           | 526                 | 48294                   | G                | A                 | GAA->E            | AAA->K             | non-synonymous  | IS1634AC transposase                     | yes                          |
| ben1_0038        | 47769             | 49289           | 567                 | 48335                   | C                | T                 | ACC->T            | ACT->T             | synonymous      | IS1634AC transposase                     | yes                          |
| ben1_0038        | 47769             | 49289           | 1077                | 48845                   | T                | C                 | ACT->T            | ACC->T             | synonymous      | IS1634AC transposase                     | yes                          |
| ben1_0038        | 47769             | 49289           | 1090                | 48858                   | G                | A                 | GAT->D            | AAT->N             | non-synonymous  | IS1634AC transposase                     | yes                          |
| ben1_0058        | 67770             | 66910           | 446                 | 67325                   | G                | T                 | TCC->S            | TAC->Y             | non-synonymous  | IS1296IE transposase protein B           |                              |
| ben1_0059        | 67958             | 67779           | 165                 | 67794                   | T                | C                 | AGA->R            | AGG->R             | synonymous      | IS1296MP transposase protein A           |                              |
| ben1_0059        | 67958             | 67779           | 109                 | 67850                   | T                | C                 | AAG->K            | GAG->E             | non-synonymous  | IS1296MP transposase protein A           |                              |
| ben1_0099        | 110854            | 112257          | 94                  | 110947                  | C                | T                 | CCA->P            | TCA->S             | non-synonymous  | IS1634AW transposase                     | yes                          |
| ben1_0117        | 132240            | 132863          | 593                 | 132832                  | T                | C                 | TTT->F            | TCT->S             | non-synonymous  | hypothetical protein                     |                              |
| ben1_0123        | 139097            | 137574          | 1384                | 137714                  | G                | A                 | CCC->P            | TCC->S             | non-synonymous  | transposase, IS4 family                  |                              |
| ben1_0123        | 139097            | 137574          | 1383                | 137715                  | T                | C                 | GTA->V            | GTG->V             | synonymous      | transposase, IS4 family                  |                              |
| ben1_0123        | 139097            | 137574          | 1382                | 137716                  | A                | G                 | GTA->V            | GCA->A             | non-synonymous  | transposase, IS4 family                  |                              |
| ben1_0123        | 139097            | 137574          | 1381                | 137717                  | C                | A                 | GTA->V            | TTA->L             | non-synonymous  | transposase, IS4 family                  |                              |
| ben1_0123        | 139097            | 137574          | 1380                | 137718                  | C                | A                 | ACG->T            | ACT->T             | synonymous      | transposase, IS4 family                  |                              |
| ben1_0123        | 139097            | 137574          | 1374                | 137724                  | C                | A                 | TCG->S            | TCT->S             | synonymous      | transposase, IS4 family                  |                              |
| ben1_0133        | 145176            | 146036          | 84                  | 145259                  | A                | C                 | AAA->K            | AAC->N             | non-synonymous  | IS1296MP transposase protein B           |                              |
| ben1_0144        | 157333            | 156791          | 528                 | 156806                  | C                | T                 | AGG->R            | AGA->R             | synonymous      | IS1296QT transposase protein A           | yes                          |

|           |        |        |      |        |   |   |         |        |                |                                |     |
|-----------|--------|--------|------|--------|---|---|---------|--------|----------------|--------------------------------|-----|
| ben1_0144 | 157333 | 156791 | 472  | 156862 | C | T | GAG->E  | AAG->K | non-synonymous | IS1296QT transposase protein A | yes |
| ben1_0176 | 191630 | 193150 | 1409 | 193038 | T | A | ATT->I  | AAT->N | non-synonymous | IS1634AC transposase           | yes |
| ben1_0182 | 195915 | 197435 | 360  | 196274 | A | C | ACA->T  | ACC->T | synonymous     | IS1634AC transposase           | yes |
| ben1_0182 | 195915 | 197435 | 1439 | 197353 | C | T | TCA->S  | TTA->L | non-synonymous | IS1634AC transposase           | yes |
| ben1_0182 | 195915 | 197435 | 1472 | 197386 | C | T | TCT->S  | TTT->F | non-synonymous | IS1634AC transposase           | yes |
| ben1_0184 | 197640 | 198533 | 64   | 197703 | C | T | CCCT->P | TCT->S | non-synonymous | IS1296MP transposase protein B | yes |
| ben1_0184 | 197640 | 198533 | 845  | 198484 | C | T | TCT->S  | TTT->F | non-synonymous | IS1296MP transposase protein B | yes |
| ben1_0226 | 239583 | 239404 | 165  | 239419 | T | C | AGA->R  | AGG->R | synonymous     | IS1296MP transposase protein A |     |
| ben1_0226 | 239583 | 239404 | 109  | 239475 | T | C | AAG->K  | GAG->E | non-synonymous | IS1296MP transposase protein A |     |
| ben1_0269 | 274556 | 275449 | 27   | 274582 | G | A | CTG->L  | CTA->L | synonymous     | IS1296MP transposase protein B |     |
| ben1_0269 | 274556 | 275449 | 40   | 274595 | A | G | AAA->K  | GAA->E | non-synonymous | IS1296MP transposase protein B |     |
| ben1_0269 | 274556 | 275449 | 222  | 274777 | G | A | ATG->M  | ATA->I | non-synonymous | IS1296MP transposase protein B |     |
| ben1_0269 | 274556 | 275449 | 693  | 275248 | T | C | GAT->D  | GAC->D | synonymous     | IS1296MP transposase protein B |     |
| ben1_0364 | 378594 | 379454 | 84   | 378677 | A | C | AAA->K  | AAC->N | non-synonymous | IS1296MP transposase protein B | yes |
| ben1_0391 | 406860 | 405337 | 1384 | 405477 | G | A | CCC->P  | TCC->S | non-synonymous | transposase, IS4 family        |     |
| ben1_0391 | 406860 | 405337 | 1383 | 405478 | T | C | GTA->V  | GTG->V | synonymous     | transposase, IS4 family        |     |
| ben1_0391 | 406860 | 405337 | 1382 | 405479 | A | G | GTA->V  | GCA->A | non-synonymous | transposase, IS4 family        |     |
| ben1_0391 | 406860 | 405337 | 1381 | 405480 | C | A | GTA->V  | TTA->L | non-synonymous | transposase, IS4 family        |     |
| ben1_0391 | 406860 | 405337 | 1380 | 405481 | C | A | ACG->T  | ACT->T | synonymous     | transposase, IS4 family        |     |
| ben1_0391 | 406860 | 405337 | 1374 | 405487 | C | A | TCG->S  | TCT->S | synonymous     | transposase, IS4 family        |     |
| ben1_0395 | 409207 | 408854 | 247  | 408961 | G | A | CAT->H  | TAT->Y | non-synonymous | IS1296 transposase protein B   | yes |
| ben1_0396 | 409713 | 409222 | 80   | 409634 | C | T | TGA->*  | TAA->* | synonymous     | IS1296MP transposase protein B | yes |
| ben1_0396 | 409713 | 409222 | 13   | 409701 | G | A | CAT->H  | TAT->Y | non-synonymous | IS1296MP transposase protein B | yes |
| ben1_0400 | 412824 | 411151 | 1380 | 411445 | A | G | CGT->R  | CGC->R | synonymous     | IS1634AW transposase           | yes |
| ben1_0400 | 412824 | 411151 | 1379 | 411446 | C | T | CGT->R  | CAT->H | non-synonymous | IS1634AW transposase           | yes |
| ben1_0400 | 412824 | 411151 | 1378 | 411447 | G | A | CGT->R  | TGT->C | non-synonymous | IS1634AW transposase           | yes |

|           |        |        |      |        |   |   |        |        |                |                                  |     |
|-----------|--------|--------|------|--------|---|---|--------|--------|----------------|----------------------------------|-----|
| ben1_0400 | 412824 | 411151 | 1377 | 411448 | A | C | CTT->L | CTG->L | synonymous     | IS1634AW transposase             | yes |
| ben1_0400 | 412824 | 411151 | 1376 | 411449 | A | C | CTT->L | CGT->R | non-synonymous | IS1634AW transposase             | yes |
| ben1_0400 | 412824 | 411151 | 1374 | 411451 | A | C | TCT->S | TCG->S | synonymous     | IS1634AW transposase             | yes |
| ben1_0428 | 437508 | 436966 | 528  | 436981 | T | C | AGA->R | AGG->R | synonymous     | hypothetical protein             |     |
| ben1_0428 | 437508 | 436966 | 472  | 437037 | T | C | AAG->K | GAG->E | non-synonymous | hypothetical protein             |     |
| ben1_0439 | 450157 | 451680 | 256  | 450412 | G | A | GAG->E | AAG->K | non-synonymous | transposase, IS4 family          | yes |
| ben1_0451 | 460230 | 458557 | 1647 | 458584 | C | T | GAG->E | GAA->E | synonymous     | IS1634AW transposase             |     |
| ben1_0453 | 460872 | 461732 | 206  | 461077 | G | A | GGA->G | GAA->E | non-synonymous | IS1296MP transposase protein B   |     |
| ben1_0453 | 460872 | 461732 | 741  | 461612 | A | G | TTA->L | TTG->L | synonymous     | IS1296MP transposase protein B   |     |
| ben1_0497 | 505453 | 503957 | 1468 | 503986 | C | T | GTT->V | ATT->I | non-synonymous | prolipoprotein                   |     |
| ben1_0521 | 539523 | 537880 | 526  | 538998 | C | T | GAA->E | AAA->K | non-synonymous | kinase                           |     |
| ben1_0570 | 590019 | 589840 | 165  | 589855 | T | C | AGA->R | AGG->R | synonymous     | IS1296MP transposase protein A   |     |
| ben1_0570 | 590019 | 589840 | 109  | 589911 | T | C | AAG->K | GAG->E | non-synonymous | IS1296MP transposase protein A   |     |
| ben1_0583 | 601327 | 603153 | 665  | 601991 | G | A | GGT->G | GAT->D | non-synonymous | hypothetical protein             |     |
| ben1_0595 | 616096 | 614423 | 123  | 615974 | C | T | TTG->L | TTA->L | synonymous     | IS1634AW transposase             | yes |
| ben1_0595 | 616096 | 614423 | 94   | 616003 | G | A | CCA->P | TCA->S | non-synonymous | IS1634AW transposase             | yes |
| ben1_0595 | 616096 | 614423 | 28   | 616069 | T | C | AGA->R | GGA->G | non-synonymous | IS1634AW transposase             | yes |
| ben1_0618 | 633095 | 632475 | 381  | 632715 | G | A | TTC->F | TTT->F | synonymous     | transposase ISMmy1E              |     |
| ben1_0647 | 671498 | 672925 | 1374 | 672871 | C | T | TCC->S | TCT->S | synonymous     | transposase, IS4 family          |     |
| ben1_0647 | 671498 | 672925 | 1422 | 672919 | C | T | TTC->F | TTT->F | synonymous     | transposase, IS4 family          |     |
| ben1_0647 | 671498 | 672925 | 1423 | 672920 | A | C | AAT->N | CAT->H | non-synonymous | transposase, IS4 family          |     |
| ben1_0678 | 709163 | 708984 | 165  | 708999 | T | C | AGA->R | AGG->R | synonymous     | IS1296MP transposase protein A   |     |
| ben1_0678 | 709163 | 708984 | 109  | 709055 | T | C | AAG->K | GAG->E | non-synonymous | IS1296MP transposase protein A   |     |
| ben1_0710 | 742912 | 743454 | 247  | 743158 | A | G | AAA->K | GAA->E | non-synonymous | IS1296AB_B transposase protein A |     |
| ben1_0716 | 746984 | 748504 | 425  | 747408 | G | A | AGT->S | AAT->N | non-synonymous | IS1634AC transposase             |     |
| ben1_0723 | 756783 | 755110 | 1647 | 755137 | C | T | GAG->E | GAA->E | synonymous     | IS1634AW transposase             |     |

|           |        |        |      |        |   |   |        |        |                |                                |     |
|-----------|--------|--------|------|--------|---|---|--------|--------|----------------|--------------------------------|-----|
| ben1_0723 | 756783 | 755110 | 315  | 756469 | T | G | GAA->E | GAC->D | non-synonymous | IS1634AW transposase           | yes |
| ben1_0740 | 778267 | 777803 | 412  | 777856 | T | C | AAA->K | GAA->E | non-synonymous | ferric uptake regulator        |     |
| ben1_0747 | 783051 | 784574 | 298  | 783348 | G | A | GGT->G | AGT->S | non-synonymous | transposase, IS4 family        | yes |
| ben1_0770 | 811763 | 810090 | 1471 | 810293 | G | A | CTA->L | TTA->L | synonymous     | IS1634AW transposase           | yes |
| ben1_0818 | 847686 | 846778 | 870  | 846817 | A | C | AAT->N | AAG->K | non-synonymous | RNA pseudouridylylate synthase |     |
| ben1_0834 | 865805 | 864627 | 532  | 865274 | C | T | GAA->E | AAA->K | non-synonymous | transposase ISMmy1F            | yes |
| ben1_0834 | 865805 | 864627 | 310  | 865496 | T | C | ACA->T | GCA->A | non-synonymous | transposase ISMmy1F            | yes |
| ben1_0834 | 865805 | 864627 | 8    | 865798 | A | T | ATT->I | AAT->N | non-synonymous | transposase ISMmy1F            |     |
| ben1_0839 | 871225 | 871377 | 126  | 871350 | G | A | GAG->E | GAA->E | synonymous     | transposase, IS4 family        |     |
| ben1_0850 | 883756 | 885429 | 1458 | 885213 | T | C | TAT->Y | TAC->Y | synonymous     | IS1634AW transposase           | yes |
| ben1_0851 | 887000 | 885783 | 67   | 886934 | A | G | TTA->L | CTA->L | synonymous     | variable surface protein       |     |
| ben1_0854 | 891926 | 890709 | 67   | 891860 | A | G | TTA->L | CTA->L | synonymous     | variable surface protein       |     |
| ben1_0858 | 896895 | 898418 | 1374 | 898268 | G | T | TCG->S | TCT->S | synonymous     | transposase, IS4 family        |     |
| ben1_0858 | 896895 | 898418 | 1380 | 898274 | G | T | ACG->T | ACT->T | synonymous     | transposase, IS4 family        |     |
| ben1_0858 | 896895 | 898418 | 1381 | 898275 | G | T | GTA->V | TTA->L | non-synonymous | transposase, IS4 family        |     |
| ben1_0858 | 896895 | 898418 | 1382 | 898276 | T | C | GTA->V | GCA->A | non-synonymous | transposase, IS4 family        |     |
| ben1_0858 | 896895 | 898418 | 1383 | 898277 | A | G | GTA->V | GTG->V | synonymous     | transposase, IS4 family        |     |
| ben1_0858 | 896895 | 898418 | 1384 | 898278 | C | T | CCC->P | TCC->S | non-synonymous | transposase, IS4 family        |     |
| ben1_0862 | 900341 | 901936 | 128  | 900468 | G | A | TGA->* | TAA->* | synonymous     | phosphoglyceromutase           |     |
| ben1_0882 | 920240 | 920536 | 296  | 920535 | A | G | TAA->* | TGA->* | synonymous     | hypothetical protein           |     |
| ben1_0901 | 939264 | 940787 | 28   | 939291 | A | G | AGA->R | GGA->G | non-synonymous | transposase, IS4 family        | yes |
| ben1_0901 | 939264 | 940787 | 1374 | 940637 | G | T | TCG->S | TCT->S | synonymous     | transposase, IS4 family        |     |
| ben1_0901 | 939264 | 940787 | 1380 | 940643 | G | T | ACG->T | ACT->T | synonymous     | transposase, IS4 family        |     |
| ben1_0901 | 939264 | 940787 | 1381 | 940644 | G | T | GTA->V | TTA->L | non-synonymous | transposase, IS4 family        |     |
| ben1_0901 | 939264 | 940787 | 1382 | 940645 | T | C | GTA->V | GCA->A | non-synonymous | transposase, IS4 family        |     |
| ben1_0901 | 939264 | 940787 | 1383 | 940646 | A | G | GTA->V | GTG->V | synonymous     | transposase, IS4 family        |     |

|           |         |         |      |         |   |   |        |        |                |                                |     |
|-----------|---------|---------|------|---------|---|---|--------|--------|----------------|--------------------------------|-----|
| ben1_0901 | 939264  | 940787  | 1384 | 940647  | C | T | CCC->P | TCC->S | non-synonymous | transposase, IS4 family        |     |
| ben1_0931 | 971006  | 970461  | 469  | 970538  | T | C | AAA->K | GAA->E | non-synonymous | ATP synthase subunit B         |     |
| ben1_0942 | 978404  | 979264  | 84   | 978487  | A | C | AAA->K | AAC->N | non-synonymous | IS1296MP transposase protein B | yes |
| ben1_0981 | 1016017 | 1014344 | 1488 | 1014530 | T | C | GGA->G | GGG->G | synonymous     | IS1634AW transposase           | yes |
| ben1_0981 | 1016017 | 1014344 | 123  | 1015895 | C | T | TTG->L | TTA->L | synonymous     | IS1634AW transposase           | yes |
| ben1_0981 | 1016017 | 1014344 | 94   | 1015924 | G | A | CCA->P | TCA->S | non-synonymous | IS1634AW transposase           | yes |
| ben1_0988 | 1022361 | 1021420 | 751  | 1021611 | T | C | AAT->N | GAT->D | non-synonymous | HPr kinase/phosphorylase       |     |
| ben1_0988 | 1022361 | 1021420 | 410  | 1021952 | G | A | ACT->T | ATT->I | non-synonymous | HPr kinase/phosphorylase       |     |
| ben1_0997 | 1032898 | 1032719 | 165  | 1032734 | T | C | AGA->R | AGG->R | synonymous     | IS1296MP transposase protein A |     |
| ben1_0997 | 1032898 | 1032719 | 109  | 1032790 | T | C | AAG->K | GAG->E | non-synonymous | IS1296MP transposase protein A |     |
| ben1_1008 | 1040484 | 1041800 | 718  | 1041201 | A | G | ACT->T | GCT->A | non-synonymous | replicative DNA helicase       |     |
| ben1_1021 | 1063473 | 1061800 | 1404 | 1062070 | G | A | AAC->N | AAT->N | synonymous     | IS1634AW transposase           | yes |
| ben1_1026 | 1069261 | 1067588 | 1647 | 1067615 | C | T | GAG->E | GAA->E | synonymous     | IS1634AW transposase           |     |
| ben1_1066 | 1112676 | 1114196 | 28   | 1112703 | A | G | AGA->R | GGA->G | non-synonymous | IS1634AC transposase           | yes |
| ben1_1086 | 1131115 | 1132527 | 596  | 1131710 | G | A | GGC->G | GAC->D | non-synonymous | transposase ISMmy1F            | yes |
| ben1_1086 | 1131115 | 1132527 | 1267 | 1132381 | G | A | GGC->G | AGC->S | non-synonymous | transposase ISMmy1F            |     |
| ben1_1087 | 1132607 | 1133098 | 469  | 1133075 | G | A | GTT->V | ATT->I | non-synonymous | prolipoprotein lppC            | yes |

**Supplementary Table 13. Indels occurred in CDS in Ben50 relative to Ben1**

| Indel coord<br>in Ben1 | Indel | Indel<br>Base | Indelcoord<br>in Ben50 | Ben1 Gene | Gene start | Gene End | Indel<br>location<br>in Gene | Annotation                     |
|------------------------|-------|---------------|------------------------|-----------|------------|----------|------------------------------|--------------------------------|
| 47832                  | +     | t             | 47833                  | ben1_0038 | 47769      | 49289    | 64                           | IS1634AC transposase           |
| 49172                  | +     | c             | 49174                  | ben1_0038 | 47769      | 49289    | 1404                         | IS1634AC transposase           |
| 49215                  | -     | t             | 49218                  | ben1_0038 | 47769      | 49289    | 1447                         | IS1634AC transposase           |
| 68167                  | +     | c             | 68169                  | ben1_0060 | 68345      | 68163    | 179                          | IS1296IE transposase protein A |
| 113710                 | +     | a             | 118304                 | ben1_0100 | 114140     | 113640   | 431                          | hemolysin A                    |
| 121673                 | +     | a             | 126268                 | ben1_0108 | 121520     | 121738   | 154                          | hypothetical protein           |
| 125537                 | -     | t             | 130133                 | ben1_0112 | 125759     | 125319   | 223                          | hypothetical protein           |
| 132819                 | -     | ttta          | 137414                 | ben1_0117 | 132240     | 132863   | 580                          | hypothetical protein           |
| 137720                 | -     | ttcc          | 142311                 | ben1_0123 | 139097     | 137574   | 1378                         | transposase, IS4 family        |
| 145061                 | -     | t             | 889686                 | ben1_0131 | 144318     | 145091   | 744                          | hypothetical protein           |
| 145061                 | -     | t             | 889686                 | ben1_0132 | 145045     | 145167   | 17                           | hypothetical protein           |
| 145213                 | +     | a             | 144334                 | ben1_0133 | 145176     | 146036   | 38                           | IS1296MP transposase protein B |
| 145248                 | -     | t             | 144370                 | ben1_0133 | 145176     | 146036   | 73                           | IS1296MP transposase protein B |
| 156373                 | +     | a             | 155494                 | ben1_0143 | 156782     | 156291   | 410                          | IS1296MP transposase protein B |
| 160919                 | +     | a             | 163023                 | ben1_0148 | 160882     | 161685   | 38                           | IS1296MP transposase protein B |
| 160954                 | -     | t             | 163059                 | ben1_0148 | 160882     | 161685   | 73                           | IS1296MP transposase protein B |
| 161680                 | -     | at            | 163784                 | ben1_0148 | 160882     | 161685   | 799                          | IS1296MP transposase protein B |
| 193076                 | -     | t             | 195177                 | ben1_0176 | 191630     | 193150   | 1447                         | IS1634AC transposase           |
| 196061                 | +     | a             | 198161                 | ben1_0182 | 195915     | 197435   | 147                          | IS1634AC transposase           |
| 196269                 | -     | c             | 198370                 | ben1_0182 | 195915     | 197435   | 355                          | IS1634AC transposase           |
| 197361                 | -     | t             | 199461                 | ben1_0182 | 195915     | 197435   | 1447                         | IS1634AC transposase           |
| 229556                 | -     | c             | 232191                 | ben1_0208 | 230223     | 227938   | 668                          | hypothetical protein           |

|        |   |      |        |           |        |        |      |                                              |
|--------|---|------|--------|-----------|--------|--------|------|----------------------------------------------|
| 238986 | + | a    | 241620 | ben1_0225 | 239395 | 238904 | 410  | hypothetical protein                         |
| 259973 | + | t    | 892902 | ben1_0252 | 260383 | 259892 | 411  | IS1296MP transposase protein B               |
| 259974 | + | a    | 262610 | ben1_0252 | 260383 | 259892 | 410  | IS1296MP transposase protein B               |
| 260311 | - | t    | 892565 | ben1_0252 | 260383 | 259892 | 73   | IS1296MP transposase protein B               |
| 260346 | + | a    | 892529 | ben1_0252 | 260383 | 259892 | 38   | IS1296MP transposase protein B               |
| 266719 | + | a    | 269356 | ben1_0259 | 266516 | 266803 | 204  | IS1296AB_B transposase protein A             |
| 271527 | + | t    | 274165 | ben1_0265 | 271347 | 272225 | 181  | hypothetical protein                         |
| 274277 | - | t    | 467491 | ben1_0267 | 272831 | 274351 | 1447 | IS1634AC transposase                         |
| 279616 | - | t    | 282662 | ben1_0273 | 278166 | 279686 | 1451 | IS1634AC transposase                         |
| 355362 | - | a    | 359705 | ben1_0340 | 352447 | 355395 | 2916 | hypothetical protein                         |
| 378068 | - | a    | 876864 | ben1_0363 | 378043 | 378585 | 26   | IS1296QT transposase protein A               |
| 378095 | - | a    | 876890 | ben1_0363 | 378043 | 378585 | 53   | IS1296QT transposase protein A               |
| 378096 | - | a    | 382438 | ben1_0363 | 378043 | 378585 | 54   | IS1296QT transposase protein A               |
| 378666 | - | t    | 465243 | ben1_0364 | 378594 | 379454 | 73   | IS1296MP transposase protein B               |
| 381536 | - | t    | 385864 | ben1_0365 | 380085 | 381605 | 1452 | IS1634AC transposase                         |
| 386580 | + | a    | 390908 | ben1_0372 | 386373 | 386660 | 208  | IS1296AB_B transposase protein A             |
| 405484 | - | tccc | 409813 | ben1_0391 | 406860 | 405337 | 1377 | transposase, IS4 family                      |
| 409304 | + | a    | 413629 | ben1_0396 | 409713 | 409222 | 410  | IS1296MP transposase protein B               |
| 411452 | + | tccc | 415778 | ben1_0400 | 412824 | 411151 | 1373 | IS1634AW transposase                         |
| 454250 | - | a    | 458577 | ben1_0443 | 453681 | 454376 | 570  | hypothetical protein                         |
| 457135 | + | t    | 461461 | ben1_0446 | 456362 | 457144 | 774  | glycerol-3-phosphate dehydrogenase           |
| 461174 | - | t    | 468104 | ben1_0453 | 460872 | 461732 | 303  | IS1296MP transposase protein B               |
| 503964 | + | a    | 510891 | ben1_0497 | 505453 | 503957 | 1490 | prolipoprotein                               |
| 503977 | + | a    | 510905 | ben1_0497 | 505453 | 503957 | 1477 | prolipoprotein                               |
| 503987 | + | ct   | 510916 | ben1_0497 | 505453 | 503957 | 1467 | prolipoprotein                               |
| 512344 | + | t    | 519275 | ben1_0500 | 511501 | 512367 | 844  | ABC transporter ATP-binding protein/permease |



|        |   |             |         |           |        |        |      |                                                |
|--------|---|-------------|---------|-----------|--------|--------|------|------------------------------------------------|
| 513409 | - | a           | 520342  | ben1_0503 | 513375 | 513848 | 35   | metalloprotein, YbeY family                    |
| 544322 | - | a           | 551254  | ben1_0527 | 544283 | 545095 | 40   | phosphate ABC transporter, ATP-binding protein |
| 578264 | - | t           | 585195  | ben1_0558 | 578249 | 579193 | 16   | glycerol ABC transporter ATP-binding protein   |
| 589422 | + | a           | 594002  | ben1_0569 | 589831 | 589340 | 410  | IS1296MP transposase protein B                 |
| 589691 | + | a           | 594272  | ben1_0569 | 589831 | 589340 | 141  | IS1296MP transposase protein B                 |
| 626907 | - | t           | 631487  | ben1_0609 | 627552 | 626902 | 646  | IS1296IE transposase protein B                 |
| 629676 | + | ggaa        | 634148  | ben1_0612 | 628302 | 629822 | 1375 | IS1634AC transposase                           |
| 629748 | - | t           | 1150770 | ben1_0612 | 628302 | 629822 | 1447 | IS1634AC transposase                           |
| 629753 | - | t           | 634229  | ben1_0612 | 628302 | 629822 | 1452 | IS1634AC transposase                           |
| 631755 | + | ct          | 636230  | ben1_0617 | 632421 | 631684 | 667  | transposase ISMmy1F                            |
| 632476 | + | a           | 636953  | ben1_0618 | 633095 | 632475 | 620  | transposase ISMmy1E                            |
| 672872 | + | cttcgtccaat | 677350  | ben1_0647 | 671498 | 672925 | 1375 | transposase, IS4 family                        |
| 672876 | + | ttatcaa     | 677365  | ben1_0647 | 671498 | 672925 | 1379 | transposase, IS4 family                        |
| 672915 | - | a           | 677411  | ben1_0647 | 671498 | 672925 | 1418 | transposase, IS4 family                        |
| 672921 | - | a           | 677416  | ben1_0647 | 671498 | 672925 | 1424 | transposase, IS4 family                        |
| 708566 | + | a           | 713058  | ben1_0677 | 708975 | 708484 | 410  | IS1296MP transposase protein B                 |
| 716315 | - | t           | 720808  | ben1_0684 | 716342 | 714819 | 28   | transposase, IS4 family                        |
| 734618 | - | a           | 739110  | ben1_0702 | 734843 | 734571 | 226  | hypothetical protein                           |
| 748430 | - | t           | 753008  | ben1_0716 | 746984 | 748504 | 1447 | IS1634AC transposase                           |
| 865797 | + | ta          | 870921  | ben1_0834 | 865805 | 864627 | 9    | transposase ISMmy1F                            |
| 872340 | + | a           | 878267  | ben1_0841 | 874090 | 872318 | 1751 | alkylphosphonate ABC transporter permease      |
| 885150 | - | c           | 899208  | ben1_0850 | 883756 | 885429 | 1395 | IS1634AW transposase                           |
| 885207 | + | t           | 899264  | ben1_0850 | 883756 | 885429 | 1452 | IS1634AW transposase                           |
| 898269 | - | ggaa        | 912308  | ben1_0858 | 896895 | 898418 | 1375 | transposase, IS4 family                        |
| 920501 | - | t           | 934536  | ben1_0882 | 920240 | 920536 | 262  | hypothetical protein                           |
| 930413 | + | a           | 944446  | ben1_0891 | 930210 | 930497 | 204  | IS1296AB_B transposase protein A               |

|         |   |      |         |           |         |         |      |                                                           |
|---------|---|------|---------|-----------|---------|---------|------|-----------------------------------------------------------|
| 930908  | - | a    | 944941  | ben1_0893 | 930760  | 931620  | 149  | IS1296MP transposase protein B                            |
| 940637  | - | ggga | 954670  | ben1_0901 | 939264  | 940787  | 1374 | transposase, IS4 family                                   |
| 958510  | - | g    | 971544  | ben1_0921 | 958639  | 958475  | 130  | hypothetical protein                                      |
| 978061  | + | a    | 991102  | ben1_0940 | 977854  | 978141  | 208  | IS1296AB_B transposase protein A                          |
| 978441  | + | a    | 991483  | ben1_0942 | 978404  | 979264  | 38   | IS1296MP transposase protein B                            |
| 978476  | - | t    | 991519  | ben1_0942 | 978404  | 979264  | 73   | IS1296MP transposase protein B                            |
| 998801  | - | ttcc | 1011844 | ben1_0963 | 1000178 | 998655  | 1378 | transposase, IS4 family                                   |
| 1032026 | + | a    | 1046985 | ben1_0995 | 1032204 | 1031836 | 179  | putative transposase InsK for insertion sequence<br>IS150 |
| 1032301 | + | a    | 1047261 | ben1_0996 | 1032710 | 1032219 | 410  | IS1296MP transposase protein B                            |
| 1051759 | - | a    | 1066720 | ben1_1015 | 1047950 | 1053868 | 3810 | hypothetical protein                                      |
| 1080661 | + | a    | 1093781 | ben1_1037 | 1079973 | 1080935 | 689  | oligopeptide ABC transporter permease                     |
| 1081251 | + | a    | 1094372 | ben1_1038 | 1082161 | 1081235 | 911  | UDP-galactopuranose mutase                                |
| 1085633 | - | t    | 1098755 | ben1_1042 | 1085796 | 1084882 | 164  | glycosyltransferase                                       |
| 1090715 | - | t    | 1102576 | ben1_1046 | 1091035 | 1090493 | 321  | hypothetical protein                                      |
| 1114122 | - | t    | 1125982 | ben1_1066 | 1112676 | 1114196 | 1447 | IS1634AC transposase                                      |
| 1134641 | - | t    | 1146093 | ben1_1088 | 1133190 | 1134710 | 1452 | IS1634AC transposase                                      |
| 1136717 | + | ta   | 1151846 | ben1_1093 | 1137126 | 1136635 | 410  | IS1296MP transposase protein B                            |
| 1137562 | + | tc   | 1149013 | ben1_1095 | 1137675 | 1137550 | 114  | hypothetical protein                                      |
| 1137563 | + | ct   | 1152694 | ben1_1095 | 1137675 | 1137550 | 113  | hypothetical protein                                      |
| 1137622 | - | t    | 1149075 | ben1_1095 | 1137675 | 1137550 | 54   | hypothetical protein                                      |
| 1137647 | + | t    | 1152780 | ben1_1095 | 1137675 | 1137550 | 29   | hypothetical protein                                      |
| 1137650 | - | t    | 1149102 | ben1_1095 | 1137675 | 1137550 | 26   | hypothetical protein                                      |
| 1137657 | + | t    | 1152791 | ben1_1095 | 1137675 | 1137550 | 19   | hypothetical protein                                      |
| 1137664 | - | ta   | 1149115 | ben1_1095 | 1137675 | 1137550 | 12   | hypothetical protein                                      |

**Supplementary Table 14. Genes under positive selection during evolving to Ben50**

| Gene                 | Ka          | Ks          | Ka/Ks   | P-Value(Fisher) | Length | S-Sites | N-Sites | Product                                  |
|----------------------|-------------|-------------|---------|-----------------|--------|---------|---------|------------------------------------------|
| ben50_0114_ben1_1041 | 0.00959277  | 0.00801954  | 1.19617 | 0.503352        | 1110   | 156.805 | 953.195 | glycosyltransferase                      |
| ben50_0033_ben1_0033 | 0.000200835 | 8.76E-05    | 2.29158 | 0.367879        | 5289   | 549.642 | 4739.36 | efflux ABC transporter, permease protein |
| ben50_0490_ben1_0497 | 0.00447652  | 0.00127331  | 3.51565 | 0.6751          | 1476   | 154.711 | 1321.29 | prolipoprotein                           |
| ben50_0553_ben1_0562 | 0.00127042  | 3.76E-05    | 33.8124 | 0.527809        | 1848   | 274.392 | 1573.61 | lipoprotein B precursor                  |
| ben50_0901_ben1_0919 | 0.00131582  | 3.44E-05    | 38.297  | 0.316192        | 897    | 126.03  | 770.97  | carbamate kinase                         |
| ben50_0115_ben1_1044 | 0.0011637   | 2.76E-05    | 42.1422 | 0.367879        | 894    | 32.3395 | 861.66  | glycosyltransferase                      |
| ben50_0800_ben1_0818 | 0.00115168  | 2.59E-05    | 44.4888 | 0.367879        | 897    | 23.7889 | 873.211 | RNA pseudouridylate synthase             |
| ben50_0438_ben1_0446 | 0.00269394  | 5.76E-05    | 46.7876 | 0.392371        | 780    | 15.4824 | 764.518 | glycerol-3-phosphate dehydrogenase       |
| ben50_0722_ben1_0740 | 0.00250534  | 5.27E-05    | 47.533  | 0.367879        | 462    | 56.4436 | 405.556 | ferric uptake regulator                  |
| ben50_0116_ben1_1045 | 0.00134998  | 2.70E-05    | 50      | 0.322245        | 870    | 107.921 | 762.079 | nucleotidyl transferase                  |
| ben50_0140_ben1_0428 | 0.00474903  | 9.50E-05    | 50      | 0.522411        | 534    | 75.953  | 458.047 | hypothetical protein                     |
| ben50_0513_ben1_0521 | 0.000718034 | 1.44E-05    | 50      | 0.367879        | 1629   | 204.356 | 1424.64 | kinase                                   |
| ben50_0571_ben1_0583 | 0.000605038 | 1.21E-05    | 50      | 0.367879        | 1797   | 125.58  | 1671.42 | hypothetical protein                     |
| ben50_0904_ben1_0923 | 0.000577111 | 1.15E-05    | 50      | 0.312232        | 2139   | 323.556 | 1815.44 | magnesium-importing ATPase               |
| ben50_0905_ben1_0924 | 0.001099    | 2.20E-05    | 50      | 0.466904        | 1143   | 179.056 | 963.944 | hypothetical protein                     |
| ben50_0918_ben1_0931 | 0.0022449   | 4.49E-05    | 50      | 0.367879        | 543    | 69.7609 | 473.239 | ATP synthase subunit B                   |
| ben50_0974_ben1_0988 | 0.0026006   | 5.20E-05    | 50      | 0.534318        | 933    | 132.125 | 800.875 | HPr kinase/phosphorylase                 |
| ben50_0993_ben1_1008 | 0.000897825 | 1.80E-05    | 50      | 0.321219        | 1305   | 165.521 | 1139.48 | replicative DNA helicase                 |
| ben50_1021_ben1_1037 | 0.00879379  | 0.000175876 | 50      | 0.700568        | 690    | 95.4999 | 594.5   | oligopeptide ABC transporter permease    |

**Supplementary Table 15. Genes might contribute to rabbit virulence**

| <b>Ben1 Gene</b> | <b>Annotation</b>                              | <b>COG Class</b>                                | <b>KO</b> |
|------------------|------------------------------------------------|-------------------------------------------------|-----------|
| ben1_0500        | ABC transporter ATP-binding protein/permease   | Translation, ribosomal structure and biogenesis |           |
| ben1_0841        | alkylphosphonate ABC transporter permease      |                                                 |           |
| ben1_0931        | ATP synthase subunit B                         |                                                 |           |
| ben1_0919        | carbamate kinase                               | DNA replication, recombination, and repair      |           |
| ben1_0033        | efflux ABC transporter, permease protein       | Amino acid transport and metabolism             | K00259    |
| ben1_0740        | ferric uptake regulator                        |                                                 |           |
| ben1_0558        | glycerol ABC transporter ATP-binding protein   |                                                 |           |
| ben1_0446        | glycerol-3-phosphate dehydrogenase             | DNA replication, recombination, and repair      |           |
| ben1_1042        | glycosyltransferase                            | Cell envelope biogenesis, outer membrane        |           |
| ben1_1041        | glycosyltransferase                            | DNA replication, recombination, and repair      |           |
| ben1_1044        | glycosyltransferase                            |                                                 |           |
| ben1_0100        | hemolysin A                                    | Translation, ribosomal structure and biogenesis |           |
| ben1_0988        | HPr kinase/phosphorylase                       | DNA replication, recombination, and repair      | K02314    |
| ben1_0117        | hypothetical protein                           | DNA replication, recombination, and repair      |           |
| ben1_0428        | hypothetical protein                           | DNA replication, recombination, and repair      |           |
| ben1_0583        | hypothetical protein                           | DNA replication, recombination, and repair      |           |
| ben1_0882        | hypothetical protein                           | Signal transduction mechanisms                  |           |
| ben1_0108        | hypothetical protein                           |                                                 |           |
| ben1_0112        | hypothetical protein                           |                                                 |           |
| ben1_0131        | hypothetical protein                           | Function unknown                                |           |
| ben1_0132        | hypothetical protein                           | DNA replication, recombination, and repair      |           |
| ben1_0208        | hypothetical protein                           |                                                 |           |
| ben1_0225        | hypothetical protein                           | General function prediction only                |           |
| ben1_0265        | hypothetical protein                           | General function prediction only                |           |
| ben1_0340        | hypothetical protein                           | Carbohydrate transport and metabolism           | K01809    |
| ben1_0443        | hypothetical protein                           | General function prediction only                |           |
| ben1_0702        | hypothetical protein                           | Transcription                                   |           |
| ben1_0921        | hypothetical protein                           | Function unknown                                |           |
| ben1_1015        | hypothetical protein                           | Carbohydrate transport and metabolism           | K11192    |
| ben1_1046        | hypothetical protein                           |                                                 |           |
| ben1_1095        | hypothetical protein                           |                                                 | K02914    |
| ben1_0924        | hypothetical protein                           | Carbohydrate transport and metabolism           |           |
| ben1_0521        | kinase                                         |                                                 |           |
| ben1_0562        | lipoprotein B precursor                        |                                                 |           |
| ben1_0923        | magnesium-importing ATPase                     | Translation, ribosomal structure and biogenesis | K02887    |
| ben1_0503        | metalloprotein, YbeY family                    | Translation, ribosomal structure and biogenesis |           |
| ben1_1045        | nucleotidyl transferase                        | Carbohydrate transport and metabolism           | K01689    |
| ben1_1037        | oligopeptide ABC transporter permease          | Cell envelope biogenesis, outer membrane        |           |
| ben1_0527        | phosphate ABC transporter, ATP-binding protein | Lipid metabolism                                | K06131    |
| ben1_0862        | phosphoglyceromutase                           | Energy production and conversion                | K02112    |
| ben1_0497        | prolipoprotein                                 |                                                 |           |
| ben1_1087        | prolipoprotein lppC                            |                                                 |           |

|           |                              |                                        |        |
|-----------|------------------------------|----------------------------------------|--------|
| ben1_1008 | replicative DNA helicase     | General function prediction only       | K07106 |
| ben1_0818 | RNA pseudouridylate synthase |                                        |        |
| ben1_1038 | UDP-galactopuranose mutase   |                                        |        |
| ben1_0851 | variable surface protein     | Function unknown                       |        |
| ben1_0854 | variable surface protein     | Inorganic ion transport and metabolism |        |

---

**Supplementary Table 16. Ben1 genes involved in lipids metabolism**

|                                | Gene      | Product                                                            | KO     | COG     | EC       | Substrate                      | Product                                      |
|--------------------------------|-----------|--------------------------------------------------------------------|--------|---------|----------|--------------------------------|----------------------------------------------|
| Glycerophospholipid metabolism | ben1_0284 | FAD dependent oxidoreductase                                       | K00111 | COG0579 | 1.1.5.3  | glycerone phosphate            | sn-glycerol 3-phosphate                      |
|                                | ben1_0446 | glycerol-3-phosphate dehydrogenase                                 | K00057 | COG0240 | 1.1.1.94 | glycerone phosphate            | sn-glycerol 3-phosphate                      |
|                                | ben1_0520 | glycerol-3-phosphate acyltransferase PlsX                          | K03621 | COG0416 | 2.3.1.15 | sn-glycerol 3-phosphate        | 1-acyl-sn-glycerol 3-phosphate               |
|                                | ben1_0113 | acyl-phosphate glycerol 3-phosphate acyltransferase                | K08591 | COG0344 | 2.3.1.15 | sn-glycerol 3-phosphate        | 1-acyl-sn-glycerol 3-phosphate               |
|                                | ben1_0624 | 1-acyl-sn-glycerol-3-phosphate acyltransferase                     | K00655 | COG0204 | 2.3.1.51 | 1-acyl-sn-glycerol 3-phosphate | 1,2-diacyl-sn-glycerol 3-phosphate           |
|                                | ben1_0382 | phosphatidate cytidyltransferase                                   | K00981 | COG0575 | 2.7.7.41 | phosphatidate                  | CDP-diacylglycerol                           |
|                                | ben1_0955 | CDP-diacylglycerol--glycerol-3-phosphate 3-phosphatidyltransferase | K00995 | COG0558 | 2.7.8.5  | CDP-diacylglycerol             | 3(3-sn-phosphatidyl)-sn-glycerol 1-phosphate |
|                                | ben1_0162 | cardiolipin synthetase                                             | K06131 | COG1502 | 2.7.8.-  | CDP-diacylglycerol             | cardiolipin                                  |
|                                | ben1_0875 | lysophospholipase                                                  | K01048 | COG2267 | 3.1.1.5  | 2-lysophosphatidylcholine      | glycerophosphocholine                        |
|                                | ben1_0151 | glycerophosphodiester phosphodiesterase family protein             | K01126 | COG0584 | 3.1.4.46 | glycerophosphodiester          | sn-glycerol 3-phosphate                      |
| Glycerolipid metabolism        | ben1_0283 | glycerol kinase                                                    | K00864 | COG0554 | 2.7.1.30 | glycerol                       | sn-glycerol 3-phosphate                      |
|                                | ben1_0800 | dihydroxyacetone kinase subunit DhaK                               | K05878 | COG2376 |          | glycerone                      | glycerone phosphate                          |
|                                | ben1_0300 | glycerone kinase                                                   | K05879 | COG2376 | 2.7.1.29 | glycerone                      | glycerone phosphate                          |
|                                | ben1_0401 | Lipase esterase                                                    | K01046 | COG0596 | 3.1.1.3  | diacylglycerol                 | triacylglycerol                              |
|                                | ben1_0576 | triacylglycerol lipase                                             | K01046 | COG0596 | 3.1.1.3  | diacylglycerol                 | triacylglycerol                              |
|                                | ben1_0577 | triacylglycerol lipase                                             | K01046 | COG0596 | 3.1.1.3  | diacylglycerol                 | triacylglycerol                              |
|                                | ben1_0625 | holo-ACP synthase                                                  |        | COG0736 |          |                                |                                              |
|                                | ben1_0856 | hypothetical protein                                               | K06889 | COG2267 |          |                                |                                              |
|                                | ben1_0029 | NAD(P)H dehydrogenase (quinone)                                    | K01118 | COG1182 |          |                                |                                              |

**Supplementary Table 17. MHC-I binding prediction of Ben1 and Ben50 ortholog in rabbit host**

| Gene       | allele | start | end | length | peptide          | method | percentile_rank | smm_ic50 (nM) |
|------------|--------|-------|-----|--------|------------------|--------|-----------------|---------------|
| ben1_0117  | RT1A   | 191   | 205 | 15     | VWYFIYLFILFIFTN  | smm    | 0.4             | 290.95        |
| ben50_0123 | RT1A   | 191   | 205 | 15     | VWYFIYLSYLFLPIL  | smm    | 0.2             | 119.35        |
| ben1_0740  | RT1A   | 127   | 141 | 15     | CEKNGIKLSHFKEIEG | smm    | 4.7             | 1166.33       |
| ben50_0722 | RT1A   | 127   | 141 | 15     | CEKNGIKLSHFEIEG  | smm    | 1.4             | 619.18        |
| ben1_0988  | RT1A   | 128   | 142 | 15     | DIYDIYFSPTAEEHA  | smm    | 0.6             | 403.48        |
| ben50_0974 | RT1A   | 128   | 142 | 15     | DIYDIYFSPIAEEHA  | smm    | 1               | 522.18        |

**Supplementary Table 18. SNPs occurred in CDS in Ben181 relative to Ben50**

| Ben50 Gene | Gene Start | Gene End | SNP location | SNPcoord in Ben50 | Ben50 base | Ben181 base | Ben50 codon | Ben181 codon | SNP Type       | Annotation                                                 |
|------------|------------|----------|--------------|-------------------|------------|-------------|-------------|--------------|----------------|------------------------------------------------------------|
| ben50_0009 | 13626      | 11059    | 911          | 12716             | G          | A           | GCA->A      | GTA->V       | non-synonymous | amino acid or sugar ABC transport system, permease protein |
| ben50_0072 | 79696      | 78173    | 1384         | 78313             | G          | A           | CCC->P      | TCC->S       | non-synonymous | transposase, IS4 family                                    |
| ben50_0072 | 79696      | 78173    | 1383         | 78314             | T          | C           | GTA->V      | GTG->V       | synonymous     | transposase, IS4 family                                    |
| ben50_0072 | 79696      | 78173    | 1382         | 78315             | A          | G           | GTA->V      | GCA->A       | non-synonymous | transposase, IS4 family                                    |
| ben50_0072 | 79696      | 78173    | 1381         | 78316             | C          | A           | GTA->V      | TTA->L       | non-synonymous | transposase, IS4 family                                    |
| ben50_0072 | 79696      | 78173    | 1380         | 78317             | C          | A           | ACG->T      | ACT->T       | synonymous     | transposase, IS4 family                                    |
| ben50_0072 | 79696      | 78173    | 1374         | 78323             | C          | A           | TCG->S      | TCT->S       | synonymous     | transposase, IS4 family                                    |
| ben50_0090 | 105087     | 102253   | 1221         | 103867            | T          | C           | TTA->L      | TTG->L       | synonymous     | preprotein translocase subunit SecA                        |
| ben50_0114 | 126115     | 127464   | 383          | 126497            | G          | A           | AGA->R      | AAA->K       | non-synonymous | glycosyltransferase, group 2 family protein                |
| ben50_0114 | 126115     | 127464   | 384          | 126498            | A          | T           | AGA->R      | AGT->S       | non-synonymous | glycosyltransferase, group 2 family protein                |
| ben50_0114 | 126115     | 127464   | 443          | 126557            | C          | A           | ACT->T      | AAT->N       | non-synonymous | glycosyltransferase, group 2 family protein                |
| ben50_0114 | 126115     | 127464   | 511          | 126625            | G          | A           | GAA->E      | AAA->K       | non-synonymous | glycosyltransferase, group 2 family protein                |
| ben50_0114 | 126115     | 127464   | 690          | 126804            | T          | A           | TTT->F      | TTA->L       | non-synonymous | glycosyltransferase, group 2 family protein                |
| ben50_0114 | 126115     | 127464   | 732          | 126846            | T          | C           | GAT->D      | GAC->D       | synonymous     | glycosyltransferase, group 2 family protein                |
| ben50_0114 | 126115     | 127464   | 827          | 126941            | G          | A           | AGC->S      | AAC->N       | non-synonymous | glycosyltransferase, group 2 family protein                |
| ben50_0114 | 126115     | 127464   | 1129         | 127243            | A          | G           | ATT->I      | GTT->V       | non-synonymous | glycosyltransferase, group 2 family protein                |
| ben50_0114 | 126115     | 127464   | 1274         | 127388            | C          | T           | ACT->T      | ATT->I       | non-synonymous | glycosyltransferase, group 2 family protein                |
| ben50_0114 | 126115     | 127464   | 1313         | 127427            | T          | C           | ATT->I      | ACT->T       | non-synonymous | glycosyltransferase, group 2 family protein                |
| ben50_0115 | 128431     | 127517   | 857          | 127575            | C          | A           | AGA->R      | ATA->I       | non-synonymous | glycosyltransferase                                        |
| ben50_0116 | 129706     | 128834   | 287          | 129420            | C          | T           | AGT->S      | AAT->N       | non-synonymous | UTPglucose1phosphate uridylyltransferase                   |
| ben50_0140 | 156455     | 155913   | 275          | 156181            | A          | T           | TTT->F      | TAT->Y       | non-synonymous | hypothetical protein                                       |
| ben50_0182 | 199739     | 200299   | 27           | 199765            | G          | A           | CTG->L      | CTA->L       | synonymous     | IS1296UK transposase                                       |
| ben50_0182 | 199739     | 200299   | 271          | 200009            | A          | G           | ACA->T      | GCA->A       | non-synonymous | IS1296UK transposase                                       |



|            |        |        |      |        |   |   |        |        |                |                                                                                |
|------------|--------|--------|------|--------|---|---|--------|--------|----------------|--------------------------------------------------------------------------------|
| ben50_0183 | 200308 | 201168 | 236  | 200543 | G | A | AGG->R | AAG->K | non-synonymous | IS1296UK transposase protein B                                                 |
| ben50_0201 | 222981 | 225425 | 2438 | 225418 | A | G | AAC->N | AGC->S | non-synonymous | transfer complex protein TrsE                                                  |
| ben50_0224 | 242030 | 241170 | 236  | 241795 | C | T | AGG->R | AAG->K | non-synonymous | IS1296JI transposase protein B                                                 |
| ben50_0225 | 242581 | 242039 | 20   | 242562 | T | G | AAA->K | ACA->T | non-synonymous | IS1296QT transposase protein A                                                 |
| ben50_0248 | 260817 | 262229 | 627  | 261443 | C | T | TAC->Y | TAT->Y | synonymous     | transposase ISMmy1B                                                            |
| ben50_0248 | 260817 | 262229 | 1226 | 262042 | T | C | TTA->L | TCA->S | non-synonymous | transposase ISMmy1B                                                            |
| ben50_0250 | 263571 | 263086 | 485  | 263087 | T | C | TAA->* | TGA->* | synonymous     | IS1296QT transposase protein A                                                 |
| ben50_0256 | 269704 | 270564 | 236  | 269939 | G | A | AGG->R | AAG->K | non-synonymous | IS1296MP transposase protein B                                                 |
| ben50_0262 | 275174 | 275377 | 96   | 275269 | T | C | GAT->D | GAC->D | synonymous     | hypothetical protein                                                           |
| ben50_0265 | 277634 | 278494 | 856  | 278489 | T | A | TTT->F | ATT->I | non-synonymous | IS1296OD transposase protein B                                                 |
| ben50_0317 | 338264 | 336684 | 657  | 337608 | G | A | TTC->F | TTT->F | synonymous     | amino acid permease                                                            |
| ben50_0338 | 360709 | 362382 | 1394 | 362102 | T | C | TTA->L | TCA->S | non-synonymous | IS1634AW transposase                                                           |
| ben50_0366 | 390001 | 390645 | 628  | 390628 | A | T | AAA->K | TAA->* | non-synonymous | transmembrane protein                                                          |
| ben50_0368 | 391252 | 392127 | 833  | 392084 | A | C | CAA->Q | CCA->P | non-synonymous | putative transposase InsK for insertion sequence IS150                         |
| ben50_0383 | 411185 | 409512 | 1471 | 409715 | G | A | CTA->L | TTA->L | synonymous     | IS1634AW transposase                                                           |
| ben50_0383 | 411185 | 409512 | 1205 | 409981 | C | T | GGT->G | GAT->D | non-synonymous | IS1634AW transposase                                                           |
| ben50_0383 | 411185 | 409512 | 1113 | 410073 | A | T | AAT->N | AAA->K | non-synonymous | IS1634AW transposase                                                           |
| ben50_0387 | 413910 | 413179 | 669  | 413242 | T | A | AAA->K | AAT->N | non-synonymous | IS1296UK transposase protein B                                                 |
| ben50_0387 | 413910 | 413179 | 649  | 413262 | T | C | AAC->N | GAC->D | non-synonymous | IS1296UK transposase protein B                                                 |
| ben50_0411 | 435213 | 435830 | 433  | 435645 | A | T | AGA->R | TGA->* | non-synonymous | Chain A, Structure Of Deoxyadenosine Kinase From M.Mycoides<br>With Bound Datp |
| ben50_0419 | 441285 | 440872 | 412  | 440874 | A | G | TAA->* | CAA->Q | non-synonymous | IS1296MP transposase protein B                                                 |
| ben50_0420 | 441836 | 441294 | 222  | 441615 | T | C | AAA->K | AAG->K | synonymous     | IS1296QT transposase protein A                                                 |
| ben50_0426 | 447180 | 449177 | 1079 | 448258 | A | G | CAG->Q | CGG->R | non-synonymous | Na+ ABC transporter ATPbinding protein                                         |
| ben50_0426 | 447180 | 449177 | 1080 | 448259 | G | C | CAG->Q | CAC->H | non-synonymous | Na+ ABC transporter ATPbinding protein                                         |
| ben50_0427 | 449337 | 449924 | 356  | 449692 | T | A | TTA->L | TAA->* | non-synonymous | hypothetical protein                                                           |

|            |        |        |      |        |   |   |        |        |                |                                             |
|------------|--------|--------|------|--------|---|---|--------|--------|----------------|---------------------------------------------|
| ben50_0431 | 454484 | 456007 | 1374 | 455857 | G | T | TCG->S | TCT->S | synonymous     | IS1634BM transposase                        |
| ben50_0431 | 454484 | 456007 | 1380 | 455863 | G | T | ACG->T | ACT->T | synonymous     | IS1634BM transposase                        |
| ben50_0431 | 454484 | 456007 | 1381 | 455864 | G | T | GTA->V | TTA->L | non-synonymous | IS1634BM transposase                        |
| ben50_0431 | 454484 | 456007 | 1382 | 455865 | T | C | GTA->V | GCA->A | non-synonymous | IS1634BM transposase                        |
| ben50_0431 | 454484 | 456007 | 1383 | 455866 | A | G | GTA->V | GTG->V | synonymous     | IS1634BM transposase                        |
| ben50_0431 | 454484 | 456007 | 1384 | 455867 | C | T | CCC->P | TCC->S | non-synonymous | IS1634BM transposase                        |
| ben50_0505 | 531747 | 535901 | 2371 | 534117 | A | G | AAA->K | GAA->E | non-synonymous | putative membrane protein                   |
| ben50_0549 | 584903 | 586123 | 395  | 585297 | C | T | TCA->S | TTA->L | non-synonymous | glycerol ABC transporter ATPbinding protein |
| ben50_0568 | 602776 | 603510 | 697  | 603472 | A | T | AAA->K | TAA->* | non-synonymous | hypothetical protein                        |
| ben50_0576 | 610450 | 611808 | 986  | 611435 | A | T | GAT->D | GTT->V | non-synonymous | dihydroliipoamide dehydrogenase             |
| ben50_0576 | 610450 | 611808 | 987  | 611436 | T | A | GAT->D | GAA->E | non-synonymous | dihydroliipoamide dehydrogenase             |
| ben50_0599 | 632774 | 634297 | 1374 | 634147 | G | T | TCG->S | TCT->S | synonymous     | transposase, IS4 family                     |
| ben50_0599 | 632774 | 634297 | 1380 | 634153 | G | T | ACG->T | ACT->T | synonymous     | transposase, IS4 family                     |
| ben50_0599 | 632774 | 634297 | 1381 | 634154 | G | T | GTA->V | TTA->L | non-synonymous | transposase, IS4 family                     |
| ben50_0599 | 632774 | 634297 | 1382 | 634155 | T | C | GTA->V | GCA->A | non-synonymous | transposase, IS4 family                     |
| ben50_0599 | 632774 | 634297 | 1383 | 634156 | A | G | GTA->V | GTG->V | synonymous     | transposase, IS4 family                     |
| ben50_0599 | 632774 | 634297 | 1384 | 634157 | C | T | CCC->P | TCC->S | non-synonymous | transposase, IS4 family                     |
| ben50_0666 | 720751 | 719312 | 1300 | 719452 | G | A | CCC->P | TCC->S | non-synonymous | transposase, IS4 family                     |
| ben50_0666 | 720751 | 719312 | 1299 | 719453 | T | C | GTA->V | GTG->V | synonymous     | transposase, IS4 family                     |
| ben50_0666 | 720751 | 719312 | 1298 | 719454 | A | G | GTA->V | GCA->A | non-synonymous | transposase, IS4 family                     |
| ben50_0666 | 720751 | 719312 | 1297 | 719455 | C | A | GTA->V | TTA->L | non-synonymous | transposase, IS4 family                     |
| ben50_0666 | 720751 | 719312 | 1296 | 719456 | C | A | ACG->T | ACT->T | synonymous     | transposase, IS4 family                     |
| ben50_0666 | 720751 | 719312 | 1290 | 719462 | C | A | TCG->S | TCT->S | synonymous     | transposase, IS4 family                     |
| ben50_0729 | 788173 | 789696 | 1374 | 789546 | G | T | TCG->S | TCT->S | synonymous     | IS1634BM transposase                        |
| ben50_0729 | 788173 | 789696 | 1380 | 789552 | G | T | ACG->T | ACT->T | synonymous     | IS1634BM transposase                        |
| ben50_0729 | 788173 | 789696 | 1381 | 789553 | G | T | GTA->V | TTA->L | non-synonymous | IS1634BM transposase                        |

|            |        |        |      |        |   |   |        |        |                |                      |
|------------|--------|--------|------|--------|---|---|--------|--------|----------------|----------------------|
| ben50_0729 | 788173 | 789696 | 1382 | 789554 | T | C | GTA->V | GCA->A | non-synonymous | IS1634BM transposase |
| ben50_0729 | 788173 | 789696 | 1383 | 789555 | A | G | GTA->V | GTG->V | synonymous     | IS1634BM transposase |
| ben50_0729 | 788173 | 789696 | 1384 | 789556 | C | T | CCC->P | TCC->S | non-synonymous | IS1634BM transposase |
| ben50_0788 | 838216 | 838860 | 163  | 838378 | C | T | CCA->P | TCA->S | non-synonymous | hypothetical protein |
| ben50_0788 | 838216 | 838860 | 165  | 838380 | A | C | CCA->P | CCC->P | synonymous     | hypothetical protein |
| ben50_0798 | 849874 | 847868 | 1025 | 848850 | A | C | GTT->V | GGT->G | non-synonymous | DNA ligase           |
| ben50_0820 | 874829 | 876502 | 656  | 875484 | C | T | TCA->S | TTA->L | non-synonymous | IS1634AW transposase |
| ben50_0820 | 874829 | 876502 | 658  | 875486 | A | T | AAA->K | TAA->* | non-synonymous | IS1634AW transposase |
| ben50_0820 | 874829 | 876502 | 659  | 875487 | A | G | AAA->K | AGA->R | non-synonymous | IS1634AW transposase |
| ben50_0820 | 874829 | 876502 | 661  | 875489 | G | A | GAT->D | AAT->N | non-synonymous | IS1634AW transposase |
| ben50_0820 | 874829 | 876502 | 662  | 875490 | A | G | GAT->D | GGT->G | non-synonymous | IS1634AW transposase |
| ben50_0820 | 874829 | 876502 | 664  | 875492 | G | T | GGA->G | TGA->* | non-synonymous | IS1634AW transposase |
| ben50_0820 | 874829 | 876502 | 665  | 875493 | G | A | GGA->G | GAA->E | non-synonymous | IS1634AW transposase |
| ben50_0820 | 874829 | 876502 | 667  | 875495 | A | C | AAA->K | CAA->Q | non-synonymous | IS1634AW transposase |
| ben50_0820 | 874829 | 876502 | 669  | 875497 | A | G | AAA->K | AAG->K | synonymous     | IS1634AW transposase |
| ben50_0820 | 874829 | 876502 | 671  | 875499 | T | G | TTT->F | TGT->C | non-synonymous | IS1634AW transposase |
| ben50_0820 | 874829 | 876502 | 675  | 875503 | A | C | AAA->K | AAC->N | non-synonymous | IS1634AW transposase |
| ben50_0820 | 874829 | 876502 | 676  | 875504 | G | T | GAA->E | TAA->* | non-synonymous | IS1634AW transposase |
| ben50_0820 | 874829 | 876502 | 678  | 875506 | A | T | GAA->E | GAT->D | non-synonymous | IS1634AW transposase |
| ben50_0820 | 874829 | 876502 | 679  | 875507 | G | A | GAC->D | AAC->N | non-synonymous | IS1634AW transposase |
| ben50_0820 | 874829 | 876502 | 681  | 875509 | C | T | GAC->D | GAT->D | synonymous     | IS1634AW transposase |
| ben50_0820 | 874829 | 876502 | 682  | 875510 | C | T | CAG->Q | TAG->* | non-synonymous | IS1634AW transposase |
| ben50_0820 | 874829 | 876502 | 685  | 875513 | A | G | ATT->I | GTT->V | non-synonymous | IS1634AW transposase |
| ben50_0820 | 874829 | 876502 | 686  | 875514 | T | C | ATT->I | ACT->T | non-synonymous | IS1634AW transposase |
| ben50_0820 | 874829 | 876502 | 689  | 875517 | T | A | GTT->V | GAT->D | non-synonymous | IS1634AW transposase |
| ben50_0820 | 874829 | 876502 | 690  | 875518 | T | C | GTT->V | GTC->V | synonymous     | IS1634AW transposase |

|            |        |        |     |        |   |   |        |        |                |                                |
|------------|--------|--------|-----|--------|---|---|--------|--------|----------------|--------------------------------|
| ben50_0820 | 874829 | 876502 | 692 | 875520 | T | A | ATA->I | AAA->K | non-synonymous | IS1634AW transposase           |
| ben50_0820 | 874829 | 876502 | 696 | 875524 | T | A | GGT->G | GGA->G | synonymous     | IS1634AW transposase           |
| ben50_0820 | 874829 | 876502 | 700 | 875528 | G | A | GCA->A | ACA->T | non-synonymous | IS1634AW transposase           |
| ben50_0820 | 874829 | 876502 | 701 | 875529 | C | G | GCA->A | GGA->G | non-synonymous | IS1634AW transposase           |
| ben50_0820 | 874829 | 876502 | 702 | 875530 | A | T | GCA->A | GCT->A | synonymous     | IS1634AW transposase           |
| ben50_0820 | 874829 | 876502 | 703 | 875531 | A | G | ACT->T | GCT->A | non-synonymous | IS1634AW transposase           |
| ben50_0820 | 874829 | 876502 | 704 | 875532 | C | T | ACT->T | ATT->I | non-synonymous | IS1634AW transposase           |
| ben50_0820 | 874829 | 876502 | 706 | 875534 | G | A | GAT->D | AAT->N | non-synonymous | IS1634AW transposase           |
| ben50_0820 | 874829 | 876502 | 709 | 875537 | G | A | GAA->E | AAA->K | non-synonymous | IS1634AW transposase           |
| ben50_0820 | 874829 | 876502 | 710 | 875538 | A | G | GAA->E | GGA->G | non-synonymous | IS1634AW transposase           |
| ben50_0820 | 874829 | 876502 | 715 | 875543 | G | A | GGA->G | AGA->R | non-synonymous | IS1634AW transposase           |
| ben50_0820 | 874829 | 876502 | 716 | 875544 | G | T | GGA->G | GTA->V | non-synonymous | IS1634AW transposase           |
| ben50_0820 | 874829 | 876502 | 717 | 875545 | A | T | GGA->G | GGT->G | synonymous     | IS1634AW transposase           |
| ben50_0820 | 874829 | 876502 | 719 | 875547 | T | G | ATA->I | AGA->R | non-synonymous | IS1634AW transposase           |
| ben50_0820 | 874829 | 876502 | 721 | 875549 | C | T | CCG->P | TCG->S | non-synonymous | IS1634AW transposase           |
| ben50_0820 | 874829 | 876502 | 722 | 875550 | C | T | CCG->P | CTG->L | non-synonymous | IS1634AW transposase           |
| ben50_0820 | 874829 | 876502 | 723 | 875551 | G | T | CCG->P | CCT->P | synonymous     | IS1634AW transposase           |
| ben50_0820 | 874829 | 876502 | 727 | 875555 | C | G | CAC->H | GAC->D | non-synonymous | IS1634AW transposase           |
| ben50_0820 | 874829 | 876502 | 729 | 875557 | C | A | CAC->H | CAA->Q | non-synonymous | IS1634AW transposase           |
| ben50_0820 | 874829 | 876502 | 731 | 875559 | A | C | TAC->Y | TCC->S | non-synonymous | IS1634AW transposase           |
| ben50_0820 | 874829 | 876502 | 732 | 875560 | C | T | TAC->Y | TAT->Y | synonymous     | IS1634AW transposase           |
| ben50_0820 | 874829 | 876502 | 735 | 875563 | A | G | AAA->K | AAG->K | synonymous     | IS1634AW transposase           |
| ben50_0931 | 995176 | 994526 | 514 | 994663 | G | T | CTA->L | ATA->I | non-synonymous | CTP synthetase                 |
| ben50_0931 | 995176 | 994526 | 413 | 994764 | A | G | GTT->V | GCT->A | non-synonymous | CTP synthetase                 |
| ben50_0933 | 997573 | 996713 | 569 | 997005 | T | G | CAG->Q | CCG->P | non-synonymous | IS1296MP transposase protein B |
| ben50_0935 | 998124 | 997876 | 247 | 997878 | A | C | TAA->* | GAA->E | non-synonymous | hypothetical protein           |

|            |         |         |      |         |   |   |        |        |                |                                          |
|------------|---------|---------|------|---------|---|---|--------|--------|----------------|------------------------------------------|
| ben50_0962 | 1023258 | 1024931 | 94   | 1023351 | T | C | TCA->S | CCA->P | non-synonymous | transposase, IS4 family                  |
| ben50_0962 | 1023258 | 1024931 | 123  | 1023380 | A | G | TTA->L | TTG->L | synonymous     | transposase, IS4 family                  |
| ben50_0962 | 1023258 | 1024931 | 355  | 1023612 | T | C | TCC->S | CCC->P | non-synonymous | transposase, IS4 family                  |
| ben50_0962 | 1023258 | 1024931 | 1488 | 1024745 | G | A | GGG->G | GGA->G | synonymous     | transposase, IS4 family                  |
| ben50_1029 | 1102145 | 1101273 | 287  | 1101859 | C | T | AGT->S | AAT->N | non-synonymous | UTPglucose1phosphate uridylyltransferase |
| ben50_1045 | 1112457 | 1113692 | 154  | 1112610 | G | T | GAA->E | TAA->* | non-synonymous | variable surface prolipoprotein          |
| ben50_1045 | 1112457 | 1113692 | 155  | 1112611 | A | G | GAA->E | GGA->G | non-synonymous | variable surface prolipoprotein          |
| ben50_1045 | 1112457 | 1113692 | 165  | 1112621 | A | G | AAA->K | AAG->K | synonymous     | variable surface prolipoprotein          |

---

**Supplementary Table 19. Indels occurred in CDS in Ben181 relative to Ben50**

| <b>Indelcoord<br/>in Ben1</b> | <b>Indel</b> | <b>Indel Base</b> | <b>Indelcoord<br/>in Ben181</b> | <b>Ben50 Gene</b> | <b>Gene<br/>start</b> | <b>Gene<br/>End</b> | <b>Indel location<br/>in Gene</b> | <b>Annotation</b>                                  |
|-------------------------------|--------------|-------------------|---------------------------------|-------------------|-----------------------|---------------------|-----------------------------------|----------------------------------------------------|
| 22147                         | +            | t                 | 22147                           | ben50_0015        | 23001                 | 22141               | 855                               | IS1296SQ transposase protein B                     |
| 22204                         | -            | t                 | 22205                           | ben50_0015        | 23001                 | 22141               | 798                               | IS1296SQ transposase protein B                     |
| 31268                         | -            | tttt              | 31267                           | ben50_0027        | 31279                 | 30866               | 12                                | 30S ribosomal protein S6                           |
| 61952                         | +            | a                 | 61946                           | ben50_0053        | 62238                 | 61930               | 287                               | hypothetical protein                               |
| 67556                         | -            | t                 | 67552                           | ben50_0058        | 67773                 | 66913               | 218                               | IS1296IE transposase protein B                     |
| 67557                         | -            | t                 | 1140601                         | ben50_0058        | 67773                 | 66913               | 217                               | IS1296IE transposase protein B                     |
| 78319                         | -            | ttcc              | 78314                           | ben50_0072        | 79696                 | 78173               | 1378                              | transposase, IS4 family                            |
| 91459                         | -            | t                 | 91448                           | ben50_0077        | 91474                 | 88742               | 16                                | phosphonate ABC transporter, permease protein PhnE |
| 103868                        | +            | c                 | 103856                          | ben50_0090        | 105087                | 102253              | 1220                              | preprotein translocase subunit SecA                |
| 112437                        | -            | t                 | 157486                          | ben50_0098        | 110846                | 112519              | 1592                              | transposase, IS4 family                            |
| 112460                        | +            | a                 | 157462                          | ben50_0098        | 110846                | 112519              | 1615                              | transposase, IS4 family                            |
| 125664                        | +            | a                 | 120679                          | ben50_0113        | 125865                | 123730              | 202                               | hypothetical protein                               |
| 155050                        | +            | t                 | 154764                          | ben50_0139        | 155904                | 155044              | 855                               | IS1296MP transposase protein B                     |
| 155101                        | -            | t                 | 154816                          | ben50_0139        | 155904                | 155044              | 804                               | IS1296MP transposase protein B                     |
| 155219                        | -            | gg                | 979383                          | ben50_0139        | 155904                | 155044              | 686                               | IS1296MP transposase protein B                     |
| 155687                        | -            | t                 | 155402                          | ben50_0139        | 155904                | 155044              | 218                               | IS1296MP transposase protein B                     |
| 163783                        | +            | at                | 409605                          | ben50_0147        | 163115                | 163972              | 669                               | IS1296UK transposase protein B                     |
| 163816                        | -            | t                 | 409573                          | ben50_0147        | 163115                | 163972              | 702                               | IS1296UK transposase protein B                     |
| 173649                        | +            | a                 | 170131                          | ben50_0157        | 172650                | 174122              | 1000                              | hypothetical protein                               |
| 192654                        | +            | c                 | 189139                          | ben50_0173        | 193005                | 191602              | 352                               | Mg <sup>2+</sup> transporter                       |
| 195310                        | +            | t                 | 191795                          | ben50_0174        | 193731                | 195404              | 1580                              | IS1634AW transposase                               |
| 201388                        | +            | a                 | 197744                          | ben50_0184        | 202048                | 201209              | 661                               | hypothetical protein                               |
| 225419                        | +            | g                 | 221777                          | ben50_0201        | 222981                | 225425              | 2439                              | transfer complex protein TrsE                      |

|        |   |    |        |            |        |        |      |                                                                             |
|--------|---|----|--------|------------|--------|--------|------|-----------------------------------------------------------------------------|
| 241813 | - | t  | 410222 | ben50_0224 | 242030 | 241170 | 218  | IS1296JI transposase protein B                                              |
| 270517 | + | c  | 266876 | ben50_0256 | 269704 | 270564 | 814  | IS1296MP transposase protein B                                              |
| 270526 | - | t  | 266886 | ben50_0256 | 269704 | 270564 | 823  | IS1296MP transposase protein B                                              |
| 270549 | + | t  | 266908 | ben50_0256 | 269704 | 270564 | 846  | IS1296MP transposase protein B                                              |
| 270554 | + | a  | 266914 | ben50_0256 | 269704 | 270564 | 851  | IS1296MP transposase protein B                                              |
| 278475 | + | a  | 274744 | ben50_0265 | 277634 | 278494 | 842  | IS1296OD transposase protein B                                              |
| 278489 | - | t  | 274759 | ben50_0265 | 277634 | 278494 | 856  | IS1296OD transposase protein B                                              |
| 287578 | + | a  | 283846 | ben50_0274 | 286853 | 287674 | 726  | hypothetical protein                                                        |
| 302217 | + | t  | 298488 | ben50_0286 | 301451 | 302440 | 767  | transketolase                                                               |
| 327389 | - | t  | 323664 | ben50_0307 | 329232 | 326326 | 1844 | E1E2 ATPase                                                                 |
| 335873 | + | a  | 332148 | ben50_0316 | 336619 | 335558 | 747  | hypothetical protein                                                        |
| 346634 | + | g  | 342808 | ben50_0324 | 346829 | 345927 | 196  | hypothetical protein                                                        |
| 357317 | + | a  | 353498 | ben50_0335 | 356790 | 359930 | 528  | hypothetical protein                                                        |
| 391469 | - | t  | 437469 | ben50_0368 | 391252 | 392127 | 218  | putative transposase InsK for insertion sequence IS150                      |
| 392055 | - | a  | 388250 | ben50_0368 | 391252 | 392127 | 804  | putative transposase InsK for insertion sequence IS150                      |
| 392083 | - | ca | 388277 | ben50_0368 | 391252 | 392127 | 832  | putative transposase InsK for insertion sequence IS150                      |
| 407131 | + | c  | 403328 | ben50_0380 | 406541 | 407173 | 591  | hypothetical protein                                                        |
| 407166 | + | c  | 403364 | ben50_0380 | 406541 | 407173 | 626  | hypothetical protein                                                        |
| 413185 | + | a  | 409391 | ben50_0387 | 413910 | 413179 | 726  | IS1296UK transposase protein B                                              |
| 413212 | - | t  | 409419 | ben50_0387 | 413910 | 413179 | 699  | IS1296UK transposase protein B                                              |
| 413242 | + | at | 409448 | ben50_0387 | 413910 | 413179 | 669  | IS1296UK transposase protein B                                              |
| 435565 | + | a  | 431964 | ben50_0411 | 435213 | 435830 | 353  | Chain A, Structure Of Deoxyadenosine Kinase From M.Mycoides With Bound Datp |
| 448131 | + | c  | 444530 | ben50_0426 | 447180 | 449177 | 952  | Na+ ABC transporter ATPbinding protein                                      |
| 448232 | - | t  | 444632 | ben50_0426 | 447180 | 449177 | 1053 | Na+ ABC transporter ATPbinding protein                                      |
| 448243 | + | ta | 444642 | ben50_0426 | 447180 | 449177 | 1064 | Na+ ABC transporter ATPbinding protein                                      |

|        |   |       |        |            |        |        |      |                                                                  |
|--------|---|-------|--------|------------|--------|--------|------|------------------------------------------------------------------|
| 448254 | + | a     | 444655 | ben50_0426 | 447180 | 449177 | 1075 | Na <sup>+</sup> ABC transporter ATPbinding protein               |
| 448665 | + | c     | 444972 | ben50_0426 | 447180 | 449177 | 1486 | Na <sup>+</sup> ABC transporter ATPbinding protein               |
| 449676 | + | a     | 445984 | ben50_0427 | 449337 | 449924 | 340  | hypothetical protein                                             |
| 455857 | - | ggga  | 452167 | ben50_0431 | 454484 | 456007 | 1374 | IS1634BM transposase                                             |
| 459695 | + | t     | 456001 | ben50_0437 | 459379 | 460686 | 317  | GTPbinding protein EngA                                          |
| 459904 | - | a     | 456211 | ben50_0437 | 459379 | 460686 | 526  | GTPbinding protein EngA                                          |
| 467279 | + | c     | 870242 | ben50_0445 | 466045 | 467718 | 1235 | IS1634AW transposase                                             |
| 467477 | - | t     | 870441 | ben50_0445 | 466045 | 467718 | 1433 | IS1634AW transposase                                             |
| 468104 | + | t     | 461569 | ben50_0446 | 467769 | 468104 | 336  | hypothetical protein                                             |
| 470279 | + | a     | 463745 | ben50_0450 | 469747 | 471177 | 533  | hypothetical protein                                             |
| 473433 | - | t     | 466900 | ben50_0452 | 472970 | 473440 | 464  | competence/damageinducible protein CinA Cterminal domain protein |
| 488800 | - | a     | 482267 | ben50_0470 | 487001 | 488854 | 1800 | ABC transporter, ATPbinding protein                              |
| 491102 | + | c     | 484568 | ben50_0472 | 490689 | 491441 | 414  | hypothetical protein                                             |
| 498032 | - | a     | 491500 | ben50_0480 | 497711 | 498529 | 322  | hypothetical protein                                             |
| 507478 | - | aaaaa | 500947 | ben50_0488 | 505964 | 508315 | 1515 | endopeptidase La                                                 |
| 512293 | + | t     | 505758 | ben50_0490 | 512384 | 509922 | 92   | prolipoprotein                                                   |
| 514969 | + | g     | 508435 | ben50_0491 | 512534 | 517798 | 2436 | efflux ABC transporter, permease protein                         |
| 536994 | + | a     | 530461 | ben50_0507 | 536508 | 538772 | 487  | GTP diphosphokinase                                              |
| 537224 | - | a     | 530692 | ben50_0507 | 536508 | 538772 | 717  | GTP diphosphokinase                                              |
| 543185 | + | t     | 536652 | ben50_0511 | 543785 | 543087 | 601  | ribonuclease III                                                 |
| 551619 | + | g     | 545301 | ben50_0519 | 551328 | 552026 | 292  | phosphate ABC transporter, ATPbinding protein                    |
| 554753 | + | a     | 548436 | ben50_0523 | 554345 | 555118 | 409  | metallophosphoesterase                                           |
| 561427 | + | a     | 555111 | ben50_0531 | 561558 | 561160 | 132  | histidine triad protein                                          |
| 568437 | + | g     | 562123 | ben50_0535 | 568070 | 568507 | 368  | nitrogen fixation protein NIFU                                   |
| 579853 | + | t     | 573540 | ben50_0544 | 577983 | 580679 | 1871 | DNA topoisomerase IV, A subunit                                  |
| 580618 | + | t     | 574306 | ben50_0544 | 577983 | 580679 | 2636 | DNA topoisomerase IV, A subunit                                  |



|        |   |    |        |            |        |        |      |                                             |
|--------|---|----|--------|------------|--------|--------|------|---------------------------------------------|
| 581130 | + | t  | 574819 | ben50_0545 | 580787 | 582970 | 344  | exodeoxyribonuclease V subunit alpha        |
| 585195 | + | t  | 578887 | ben50_0549 | 584903 | 586123 | 293  | glycerol ABC transporter ATPbinding protein |
| 585221 | + | a  | 578915 | ben50_0549 | 584903 | 586123 | 319  | glycerol ABC transporter ATPbinding protein |
| 585272 | + | t  | 578967 | ben50_0549 | 584903 | 586123 | 370  | glycerol ABC transporter ATPbinding protein |
| 598303 | + | a  | 594356 | ben50_0563 | 598437 | 598093 | 135  | putative calciumbinding protein             |
| 602498 | - | t  | 598552 | ben50_0567 | 602607 | 601450 | 110  | Nacetylglucosamine6phosphate deacetylase    |
| 604507 | + | g  | 600558 | ben50_0570 | 605756 | 604119 | 1250 | hypothetical protein                        |
| 605921 | + | g  | 601973 | ben50_0571 | 605908 | 607734 | 14   | hypothetical protein                        |
| 610945 | + | t  | 607000 | ben50_0576 | 610450 | 611808 | 496  | dihydrolipoamide dehydrogenase              |
| 617902 | - | t  | 613964 | ben50_0582 | 616118 | 618862 | 1785 | hypothetical protein                        |
| 617916 | - | a  | 613977 | ben50_0582 | 616118 | 618862 | 1799 | hypothetical protein                        |
| 629198 | + | a  | 625259 | ben50_0594 | 629270 | 628968 | 73   | 50S ribosomal protein L21                   |
| 635884 | + | a  | 630183 | ben50_0603 | 636060 | 635386 | 177  | prolipoprotein                              |
| 636230 | - | ct | 630531 | ben50_0604 | 637573 | 636197 | 1344 | transposase ISMmy1F                         |
| 643122 | + | a  | 637421 | ben50_0609 | 643484 | 642861 | 363  | hypothetical protein                        |
| 643162 | + | c  | 637462 | ben50_0609 | 643484 | 642861 | 323  | hypothetical protein                        |
| 657210 | - | t  | 651513 | ben50_0622 | 657701 | 656769 | 492  | Sadenosylmethyltransferase MraW             |
| 662286 | + | a  | 656589 | ben50_0627 | 662375 | 661323 | 90   | phenylalaninetRNA ligase, alpha subunit     |
| 712618 | + | t  | 708102 | ben50_0660 | 713468 | 712608 | 851  | IS1296MP transposase protein B              |
| 713251 | - | t  | 708737 | ben50_0660 | 713468 | 712608 | 218  | IS1296MP transposase protein B              |
| 717539 | + | t  | 713024 | ben50_0664 | 718927 | 716675 | 1389 | hypothetical protein                        |
| 718361 | + | c  | 713847 | ben50_0664 | 718927 | 716675 | 567  | hypothetical protein                        |
| 724041 | + | t  | 719524 | ben50_0668 | 725993 | 723732 | 1953 | mycoplasma virulence signal region          |
| 730148 | + | t  | 725632 | ben50_0675 | 730118 | 730852 | 31   | DeoR family sucrose PTS repressor           |
| 740535 | + | a  | 736020 | ben50_0686 | 740247 | 741197 | 289  | hypothetical protein                        |
| 740546 | + | t  | 736032 | ben50_0686 | 740247 | 741197 | 300  | hypothetical protein                        |

|         |   |      |         |            |         |         |      |                                                    |
|---------|---|------|---------|------------|---------|---------|------|----------------------------------------------------|
| 741913  | - | t    | 737400  | ben50_0687 | 741459  | 742178  | 455  | hypothetical protein                               |
| 741932  | - | ta   | 737418  | ben50_0687 | 741459  | 742178  | 474  | hypothetical protein                               |
| 743163  | + | t    | 738548  | ben50_0688 | 742260  | 744926  | 904  | hypothetical protein                               |
| 762090  | + | a    | 745638  | ben50_0706 | 762236  | 761454  | 147  | IS1296AB_B transposase protein B                   |
| 776859  | - | t    | 771050  | ben50_0716 | 777754  | 774791  | 896  | DNA polymerase III subunit alpha                   |
| 789546  | - | ggga | 783732  | ben50_0729 | 788173  | 789696  | 1374 | IS1634BM transposase                               |
| 800110  | + | a    | 794291  | ben50_0742 | 800119  | 798557  | 10   | putative membrane protein                          |
| 811133  | + | g    | 805316  | ben50_0748 | 811826  | 811071  | 694  | putative tRNA pseudouridine synthase A             |
| 840618  | + | a    | 834797  | ben50_0791 | 841369  | 840608  | 752  | hypothetical protein                               |
| 848481  | + | t    | 842662  | ben50_0798 | 849874  | 847868  | 1394 | DNA ligase                                         |
| 848633  | + | a    | 842815  | ben50_0798 | 849874  | 847868  | 1242 | DNA ligase                                         |
| 889198  | + | t    | 143405  | ben50_0834 | 888943  | 889791  | 256  | hypothetical protein                               |
| 912507  | - | a    | 897775  | ben50_0850 | 910934  | 912607  | 1574 | IS1634AW transposase                               |
| 932261  | - | t    | 917530  | ben50_0870 | 932579  | 931191  | 319  | betaglucosidase                                    |
| 946888  | + | a    | 932157  | ben50_0886 | 947914  | 945752  | 1027 | ribonucleosidediphosphate reductase, alpha subunit |
| 956429  | - | a    | 941698  | ben50_0895 | 955415  | 957445  | 1015 | PTS system, glucosespecific, IIBC component        |
| 959052  | - | gg   | 956629  | ben50_0897 | 958845  | 959081  | 208  | hypothetical protein                               |
| 963108  | + | gg   | 958800  | ben50_0902 | 963237  | 962707  | 130  | hypothetical protein                               |
| 981551  | + | t    | 968802  | ben50_0916 | 982943  | 981366  | 1393 | ATP synthase F1, alpha subunit                     |
| 1007916 | + | g    | 995164  | ben50_0945 | 1007736 | 1008830 | 181  | GTPdependent nucleic acidbinding protein EngD      |
| 1015564 | + | a    | 1002811 | ben50_0951 | 1015283 | 1015573 | 282  | hypothetical protein                               |
| 1028043 | + | g    | 1014998 | ben50_0965 | 1027819 | 1028634 | 225  | SIS domain protein                                 |
| 1034710 | + | a    | 1021663 | ben50_0972 | 1034804 | 1033872 | 95   | thioredoxin reductase                              |
| 1044384 | + | g    | 1031338 | ben50_0979 | 1044336 | 1045286 | 49   | hypothetical protein                               |
| 1044488 | + | a    | 1031443 | ben50_0979 | 1044336 | 1045286 | 153  | hypothetical protein                               |
| 1045274 | + | t    | 1032230 | ben50_0979 | 1044336 | 1045286 | 939  | hypothetical protein                               |

|         |   |   |         |            |         |         |     |                                |
|---------|---|---|---------|------------|---------|---------|-----|--------------------------------|
| 1046985 | - | a | 1033943 | ben50_0982 | 1047671 | 1046946 | 687 | IS1296JI transposase protein B |
| 1047454 | - | t | 1034412 | ben50_0982 | 1047671 | 1046946 | 218 | IS1296JI transposase protein B |
| 1160570 | + | g | 1149129 | ben50_1086 | 1160709 | 1160380 | 140 | ribonuclease P (protein C5)    |

---

**Supplementary Table 20. Emerged and lost genes from Ben50 to Ben181**

| <b>Gene</b> | <b>Product</b>                    | <b>KO</b> | <b>COG</b> | <b>COG Class</b>                 |
|-------------|-----------------------------------|-----------|------------|----------------------------------|
| ben50_0222  | hypothetical protein              |           |            |                                  |
| ben50_0316  | hypothetical protein              |           |            |                                  |
| ben50_0427  | hypothetical protein              |           |            |                                  |
| ben50_0456  | hypothetical protein              | K00783    | COG1576    | Function unknown                 |
| ben50_0551  | glycerol ABC transporter permease |           |            |                                  |
| ben50_0686  | hypothetical protein              |           |            |                                  |
| ben50_0687  | hypothetical protein              |           |            |                                  |
| ben50_0696  | hypothetical protein              |           | COG3654    | General function prediction only |
| ben50_0786  | hypothetical protein              |           |            |                                  |
| ben50_0963  | hypothetical protein              |           |            |                                  |
| ben181_0274 | hypothetical protein              |           |            |                                  |
| ben181_1034 | hypothetical protein              |           |            |                                  |

**Supplementary Table 21. Genes associated with immunity loss**

| Gene        | Start  | Stop   | Length (bp) | Strand | Product                                 | Best hit organism                                      | KO     | COG     |
|-------------|--------|--------|-------------|--------|-----------------------------------------|--------------------------------------------------------|--------|---------|
| ben326_0674 | 685842 | 685399 | 444         | -      | hypothetical protein                    | Mycoplasma mycoides subsp. mycoides SC str. PG1        |        |         |
| ben326_0675 | 686753 | 685842 | 912         | -      | hypothetical protein                    | Mycoplasma mycoides subsp. mycoides SC str. PG1        |        |         |
| ben326_0676 | 687249 | 686755 | 495         | -      | hypothetical protein                    | Mycoplasma mycoides subsp. mycoides SC str. PG1        |        |         |
| ben326_0677 | 688687 | 687224 | 1464        | -      | hypothetical protein                    | Mycoplasma mycoides subsp. mycoides SC str. PG1        |        |         |
| ben326_0678 | 691297 | 688718 | 2580        | -      | prolipoprotein                          | Mycoplasma mycoides subsp. mycoides SC str. PG1        |        |         |
| ben326_0679 | 693573 | 691321 | 2253        | -      | hypothetical protein                    | Mycoplasma mycoides subsp. mycoides SC str. PG1        |        |         |
| ben326_0680 | 696401 | 693846 | 2556        | -      | prolipoprotein                          | Mycoplasma mycoides subsp. mycoides SC str. PG1        |        |         |
| ben326_0681 | 698673 | 696421 | 2253        | -      | mycoplasma virulence signal region      | Mycoplasma mycoides subsp. mycoides SC str. Gladysdale |        |         |
| ben326_0682 | 699716 | 698856 | 861         | -      | IS1296MP transposase protein B          | Mycoplasma mycoides subsp. mycoides SC str. PG1        | K07497 | COG2801 |
| ben326_0683 | 700045 | 699725 | 321         | -      | IS1296 transposase protein A            | Mycoplasma mycoides subsp. capri str. GM12             |        |         |
| ben326_0684 | 700240 | 700109 | 132         | -      | hypothetical protein                    | Mycoplasma mycoides subsp. mycoides SC str. Gladysdale |        |         |
| ben326_0685 | 701953 | 700592 | 1362        | -      | hypothetical protein                    | Mycoplasma mycoides subsp. mycoides SC str. PG1        |        |         |
| ben326_0686 | 702915 | 702472 | 444         | -      | hypothetical protein                    | Mycoplasma mycoides subsp. mycoides SC str. PG1        |        |         |
| ben326_0687 | 705182 | 702930 | 2253        | -      | hypothetical protein                    | Mycoplasma mycoides subsp. mycoides SC str. PG1        |        |         |
| ben326_0689 | 707087 | 705567 | 1521        | -      | IS1634AC transposase                    | Mycoplasma mycoides subsp. mycoides SC str. PG1        |        | COG5421 |
| ben326_0690 | 709964 | 707376 | 2589        | -      | prolipoprotein                          | Mycoplasma mycoides subsp. mycoides SC str. PG1        |        |         |
| ben326_0691 | 712243 | 709985 | 2259        | -      | mycoplasma virulence signal region      | Mycoplasma mycoides subsp. mycoides SC str. Gladysdale |        |         |
| ben326_0692 | 712559 | 712398 | 162         | -      | hypothetical protein                    | Mycoplasma mycoides subsp. mycoides SC str. PG1        |        |         |
| ben326_0693 | 713127 | 712711 | 417         | -      | hypothetical protein                    | Mycoplasma mycoides subsp. mycoides SC str. PG1        |        |         |
| ben326_0694 | 714110 | 713145 | 966         | -      | hypothetical protein                    | Mycoplasma leachii PG50                                |        | COG5293 |
| ben326_0695 | 714328 | 714101 | 228         | -      | hypothetical protein                    | Mycoplasma mycoides subsp. mycoides SC str. PG1        |        |         |
| ben326_0696 | 714796 | 714614 | 183         | -      | hypothetical protein                    | Mycoplasma mycoides subsp. mycoides SC str. PG1        |        |         |
| ben326_0697 | 714813 | 714935 | 123         | +      | hypothetical protein                    |                                                        |        |         |
| ben326_0698 | 716168 | 715323 | 846         | -      | fructose-bisphosphate aldolase class-II | Mycoplasma mycoides subsp. mycoides SC str. PG1        | K08302 | COG0191 |

|             |        |        |      |   |                                             |                                                        |        |         |
|-------------|--------|--------|------|---|---------------------------------------------|--------------------------------------------------------|--------|---------|
| ben326_0699 | 716371 | 717105 | 735  | + | DeoR family sucrose PTS repressor           | Mycoplasma mycoides subsp. mycoides SC str. PG1        | K03436 | COG1349 |
| ben326_0700 | 717114 | 719000 | 1887 | + | PTS system, sucrose-specific IIBC component | Mycoplasma mycoides subsp. mycoides SC str. PG1        |        | COG1263 |
| ben326_0701 | 719119 | 719955 | 837  | + | hexose kinase                               | Mycoplasma leachii PG50                                | K00882 | COG1105 |
| ben326_0702 | 720435 | 719923 | 513  | - | hypothetical protein                        | Mycoplasma mycoides subsp. mycoides SC str. PG1        |        |         |
| ben326_0703 | 722802 | 720538 | 2265 | - | exodeoxyribonuclease V subunit alpha        | Mycoplasma mycoides                                    | K03581 | COG0507 |
| ben326_0704 | 724100 | 723723 | 378  | - | hypothetical protein                        | Mycoplasma mycoides subsp. mycoides SC str. PG1        |        |         |
| ben326_0706 | 725070 | 724531 | 540  | - | prolipoprotein                              | Mycoplasma mycoides subsp. mycoides SC str. PG1        |        |         |
| ben326_0707 | 725590 | 725360 | 231  | - | hypothetical protein                        | Mycoplasma mycoides subsp. mycoides SC str. PG1        |        |         |
| ben326_0708 | 725805 | 726155 | 351  | + | hypothetical protein                        | Mycoplasma mycoides subsp. mycoides SC str. PG1        |        |         |
| ben326_0709 | 727533 | 730199 | 2667 | + | hypothetical protein                        | Mycoplasma mycoides subsp. capri LC str. 95010         |        | COG1112 |
| ben326_0710 | 730616 | 731101 | 486  | + | Fic family protein                          | Mycoplasma mycoides subsp. mycoides SC str. PG1        |        | COG3177 |
| ben326_0711 | 731383 | 731538 | 156  | + | hypothetical protein                        | Mycoplasma mycoides subsp. mycoides SC str. PG1        |        |         |
| ben326_0712 | 732271 | 732453 | 183  | + | hypothetical protein                        |                                                        |        |         |
| ben326_0713 | 732528 | 732686 | 159  | + | hypothetical protein                        | Mycoplasma mycoides subsp. mycoides SC str. PG1        |        |         |
| ben326_0714 | 732762 | 732950 | 189  | + | IS1296DS transposase protein A              | Mycoplasma mycoides subsp. mycoides SC str. PG1        |        |         |
| ben326_0715 | 733023 | 733307 | 285  | + | IS1296 transposase protein A                | Mycoplasma mycoides subsp. capri str. GM12             |        |         |
| ben326_0716 | 733316 | 734164 | 849  | + | IS1296AB_B transposase protein B            | Mycoplasma mycoides subsp. mycoides SC str. PG1        | K07497 | COG2801 |
| ben326_0717 | 734321 | 734181 | 141  | - | hypothetical protein                        | Mycoplasma mycoides subsp. mycoides SC str. Gladysdale |        |         |
| ben326_0718 | 734794 | 734363 | 432  | - | hypothetical protein                        | Mycoplasma mycoides subsp. mycoides SC str. PG1        |        | COG3654 |
| ben326_0720 | 736717 | 736118 | 600  | - | hypothetical protein                        | Mycoplasma mycoides subsp. mycoides SC str. Gladysdale |        |         |
| ben326_0721 | 736838 | 738511 | 1674 | + | IS1634AW transposase                        | Mycoplasma mycoides subsp. mycoides SC str. PG1        |        | COG5421 |

**Supplementary Table 22. MHC-I binding prediction of 50kb lost regions in rabbit/cattle host**

| Gene        | allele      | start | end | length | peptide          | method | percentile_rank | smm_ic50 (nM) |
|-------------|-------------|-------|-----|--------|------------------|--------|-----------------|---------------|
| ben326_0675 | rabbit-RT1A | 159   | 173 | 15     | TLIKFLFSQYNYKS   | smm    | 0.4             | 336.37        |
| ben326_0675 | rabbit-RT1A | 261   | 275 | 15     | INEVDEEVKLNKKI   | smm    | 0.6             | 394.29        |
| ben326_0676 | rabbit-RT1A | 6     | 20  | 15     | KQTSQSFMVFDLYE   | smm    | 0.9             | 511.47        |
| ben326_0676 | rabbit-RT1A | 67    | 81  | 15     | DIVLNDFVITFNVNL  | smm    | 0.7             | 450.63        |
| ben326_0676 | rabbit-RT1A | 130   | 144 | 15     | QGFCVEIFPNVILFK  | smm    | 0.4             | 322.72        |
| ben326_0677 | rabbit-RT1A | 9     | 23  | 15     | QKFYDDGSNLILETK  | smm    | 0.8             | 467.54        |
| ben326_0677 | rabbit-RT1A | 33    | 47  | 15     | TIILSFFFVSMALLL  | smm    | 0.4             | 334.83        |
| ben326_0677 | rabbit-RT1A | 55    | 69  | 15     | FNKNIENSYQFLFNF  | smm    | 0.5             | 341.05        |
| ben326_0677 | rabbit-RT1A | 110   | 124 | 15     | LKQYTIWFILYLITS  | smm    | 0.7             | 450.63        |
| ben326_0677 | rabbit-RT1A | 126   | 140 | 15     | SAFILFFTYSPLEAQ  | smm    | 0.2             | 179.4         |
| ben326_0677 | rabbit-RT1A | 160   | 174 | 15     | VLFKYKTRKKNPLV   | smm    | 0.9             | 498.68        |
| ben326_0677 | rabbit-RT1A | 193   | 207 | 15     | SLVLAIFLVWINQGG  | smm    | 0.7             | 443.42        |
| ben326_0677 | rabbit-RT1A | 211   | 225 | 15     | EMLANNKFYEYVLNL  | smm    | 0.6             | 397.03        |
| ben326_0677 | rabbit-RT1A | 224   | 238 | 15     | NLFGIKNFLNFLIII  | smm    | 0.2             | 152.69        |
| ben326_0677 | rabbit-RT1A | 234   | 248 | 15     | FLIIITSFIFIGLLF  | smm    | 0.7             | 454.8         |
| ben326_0677 | rabbit-RT1A | 282   | 296 | 15     | VVFIWLISLVFLKIP  | smm    | 0.4             | 282.37        |
| ben326_0677 | rabbit-RT1A | 308   | 322 | 15     | LEYLYLLFSLLNIII  | smm    | 0.2             | 128.77        |
| ben326_0677 | rabbit-RT1A | 322   | 336 | 15     | ITIVYLWFKQFKNRL  | smm    | 0.6             | 403.48        |
| ben326_0677 | rabbit-RT1A | 352   | 366 | 15     | IIWTVFMVASFLTTN  | smm    | 0.4             | 299.79        |
| ben326_0677 | rabbit-RT1A | 384   | 398 | 15     | SYYWHIKSSRFNYY   | smm    | 0.2             | 204.09        |
| ben326_0677 | rabbit-RT1A | 409   | 423 | 15     | MIFIISLVFGFNQIL  | smm    | 0.4             | 312.48        |
| ben326_0677 | rabbit-RT1A | 449   | 463 | 15     | VAFQIINVIYPLTYM  | smm    | 0.4             | 330.99        |
| ben326_0678 | rabbit-RT1A | 6     | 20  | 15     | KLLMYASSSTLLLPI  | smm    | 0.9             | 494.11        |
| ben326_0678 | rabbit-RT1A | 34    | 48  | 15     | KPIDDNEFSKLINSI  | smm    | 0.7             | 412.88        |
| ben326_0678 | rabbit-RT1A | 114   | 128 | 15     | GNKVNIFVQFTNKKKT | smm    | 0.9             | 495.24        |
| ben326_0678 | rabbit-RT1A | 329   | 343 | 15     | KQIQSYISAQLNQLR  | smm    | 0.9             | 491.84        |
| ben326_0678 | rabbit-RT1A | 507   | 521 | 15     | TDFIKKESPLSLLK   | smm    | 0.8             | 475.14        |
| ben326_0678 | rabbit-RT1A | 537   | 551 | 15     | FAVVEIDFEKLLDTN  | smm    | 0.7             | 438.35        |
| ben326_0678 | rabbit-RT1A | 688   | 702 | 15     | LEKGNFFSYQIGYRS  | smm    | 0.7             | 424.44        |
| ben326_0678 | rabbit-RT1A | 840   | 854 | 15     | NGFSDDKVPQQFKFD  | smm    | 0.9             | 502.13        |
| ben326_0679 | rabbit-RT1A | 204   | 218 | 15     | GLFNNSIFNVLKKEF  | smm    | 0.8             | 488.45        |
| ben326_0679 | rabbit-RT1A | 251   | 265 | 15     | KLLDSPNVINFLKSE  | smm    | 0.5             | 367.13        |
| ben326_0679 | rabbit-RT1A | 396   | 410 | 15     | IRFSKLERINPNPTK  | smm    | 1               | 530.66        |
| ben326_0680 | rabbit-RT1A | 478   | 492 | 15     | KNFTKVFVTPKNSKK  | smm    | 0.8             | 482.86        |
| ben326_0680 | rabbit-RT1A | 608   | 622 | 15     | LDFDKNNSSELEEYK  | smm    | 0.5             | 353.04        |
| ben326_0680 | rabbit-RT1A | 675   | 689 | 15     | EGYTSSFSKDELEKG  | smm    | 0.7             | 443.42        |
| ben326_0681 | rabbit-RT1A | 27    | 41  | 15     | GSVIYYSFSDANISF  | smm    | 0.7             | 428.37        |
| ben326_0681 | rabbit-RT1A | 203   | 217 | 15     | GLFNNSLNFVFDKDL  | smm    | 0.3             | 220.2         |
| ben326_0681 | rabbit-RT1A | 250   | 264 | 15     | RLLSDNVVNFLEKEG  | smm    | 0.3             | 233.25        |
| ben326_0681 | rabbit-RT1A | 460   | 474 | 15     | QNFIEILSELPEHIP  | smm    | 0.4             | 270.91        |
| ben326_0681 | rabbit-RT1A | 508   | 522 | 15     | NSLRRSWSYNPLALK  | smm    | 0.6             | 390.68        |
| ben326_0685 | rabbit-RT1A | 159   | 173 | 15     | KNFTKVFVFEKNENGT | smm    | 0.4             | 321.97        |
| ben326_0685 | rabbit-RT1A | 266   | 280 | 15     | NKQIQFESESLDDK   | smm    | 0.6             | 385.32        |
| ben326_0685 | rabbit-RT1A | 367   | 381 | 15     | TDKGNFFSYQIGYRS  | smm    | 0.7             | 428.37        |
| ben326_0686 | rabbit-RT1A | 55    | 69  | 15     | LKYADIKFKNLSGSY  | smm    | 0.8             | 474.05        |
| ben326_0687 | rabbit-RT1A | 27    | 41  | 15     | GSVIYYSFSDANISF  | smm    | 0.7             | 428.37        |
| ben326_0687 | rabbit-RT1A | 233   | 247 | 15     | EAINSQNSNFFNSSI  | smm    | 0.6             | 382.67        |
| ben326_0687 | rabbit-RT1A | 457   | 471 | 15     | EISSDQKFIDILSAL  | smm    | 0.8             | 471.87        |

|             |             |     |     |    |                  |     |     |        |
|-------------|-------------|-----|-----|----|------------------|-----|-----|--------|
| ben326_0687 | rabbit-RT1A | 510 | 524 | 15 | NSLRNSWSYNPLALR  | smm | 0.7 | 417.66 |
| ben326_0690 | rabbit-RT1A | 6   | 20  | 15 | KLLMLISSSTLLIPL  | smm | 0.4 | 292.97 |
| ben326_0690 | rabbit-RT1A | 36  | 50  | 15 | KPLNDNEFINLVDSI  | smm | 0.7 | 410.98 |
| ben326_0690 | rabbit-RT1A | 57  | 71  | 15 | LKYADIKFKDPSGD   | smm | 1   | 534.34 |
| ben326_0690 | rabbit-RT1A | 486 | 500 | 15 | KNFTTFTFEAQENKS  | smm | 0.7 | 427.39 |
| ben326_0690 | rabbit-RT1A | 543 | 557 | 15 | FAVIEIDFEKLLKTD  | smm | 0.4 | 312.48 |
| ben326_0690 | rabbit-RT1A | 593 | 607 | 15 | KSKVQFESNSLLEDQ  | smm | 0.7 | 436.33 |
| ben326_0690 | rabbit-RT1A | 658 | 672 | 15 | LDYQKYDFSLWVNSE  | smm | 1   | 520.98 |
| ben326_0690 | rabbit-RT1A | 833 | 847 | 15 | KLYKDKKSALFANGF  | smm | 0.8 | 487.33 |
| ben326_0691 | rabbit-RT1A | 252 | 266 | 15 | KLLDSPKVVDLKEN   | smm | 0.3 | 237.04 |
| ben326_0691 | rabbit-RT1A | 510 | 524 | 15 | NSLRNSWSYNPLSFR  | smm | 0.5 | 347.39 |
| ben326_0691 | rabbit-RT1A | 708 | 722 | 15 | KYFEYSESLKFAGKQ  | smm | 0.7 | 449.59 |
| ben326_0693 | rabbit-RT1A | 6   | 20  | 15 | IAFASKELPEIFKQM  | smm | 0.9 | 515.02 |
| ben326_0693 | rabbit-RT1A | 93  | 107 | 15 | NDLYSKEFKNKLDER  | smm | 0.8 | 479.53 |
| ben326_0694 | rabbit-RT1A | 13  | 27  | 15 | QVIRDLEFKKGLNLI  | smm | 0.5 | 377.42 |
| ben326_0694 | rabbit-RT1A | 62  | 76  | 15 | DIYKGIESTTNDIV   | smm | 0.8 | 474.05 |
| ben326_0694 | rabbit-RT1A | 188 | 202 | 15 | LGFSFSNSKELLDQ   | smm | 0.3 | 214.69 |
| ben326_0694 | rabbit-RT1A | 205 | 219 | 15 | LKFEQDHLKLLSHN   | smm | 0.7 | 439.36 |
| ben326_0695 | rabbit-RT1A | 40  | 54  | 15 | KTLENMPFNIFLLSL  | smm | 0.2 | 110.11 |
| ben326_0696 | rabbit-RT1A | 37  | 51  | 15 | KMQDKINFNNLIKTK  | smm | 0.8 | 472.96 |
| ben326_0698 | rabbit-RT1A | 17  | 31  | 15 | YAIGAFNFDNLEMLK  | smm | 0.8 | 481.75 |
| ben326_0698 | rabbit-RT1A | 249 | 263 | 15 | TSYDARKFGRFAIEQ  | smm | 0.7 | 455.85 |
| ben326_0699 | rabbit-RT1A | 66  | 80  | 15 | YELFDEEKQHINIDI  | smm | 0.7 | 415.74 |
| ben326_0699 | rabbit-RT1A | 171 | 185 | 15 | IGMNNLSSQHFYTTN  | smm | 0.9 | 512.65 |
| ben326_0699 | rabbit-RT1A | 201 | 215 | 15 | KSFILMDSSKFGSKN  | smm | 0.4 | 259.91 |
| ben326_0700 | rabbit-RT1A | 111 | 125 | 15 | KRFVKSISAI FGPLI | smm | 0.8 | 482.86 |
| ben326_0700 | rabbit-RT1A | 239 | 253 | 15 | TGVVISYFQKLMNKY  | smm | 0.7 | 434.33 |
| ben326_0700 | rabbit-RT1A | 258 | 272 | 15 | ANFILNPLLSLLIGG  | smm | 1   | 528.23 |
| ben326_0700 | rabbit-RT1A | 287 | 301 | 15 | ESYVLKAFNWFVTLP  | smm | 0.4 | 310.33 |
| ben326_0701 | rabbit-RT1A | 24  | 38  | 15 | LVFTNGSFETFFYND  | smm | 0.4 | 331.76 |
| ben326_0701 | rabbit-RT1A | 135 | 149 | 15 | VLLKAIEKQPFLIKP  | smm | 0.7 | 435.33 |
| ben326_0701 | rabbit-RT1A | 164 | 178 | 15 | NDFDIINQAKILLQK  | smm | 0.6 | 402.55 |
| ben326_0702 | rabbit-RT1A | 97  | 111 | 15 | KDYLGYNFKFLSLII  | smm | 0.3 | 209.81 |
| ben326_0702 | rabbit-RT1A | 151 | 165 | 15 | SPFNFKSLLLIYLS   | smm | 0.8 | 487.33 |
| ben326_0703 | rabbit-RT1A | 137 | 151 | 15 | KLSNIYKFAILESEF  | smm | 0.5 | 373.96 |
| ben326_0703 | rabbit-RT1A | 168 | 182 | 15 | DKQDNFSFEEILDLL  | smm | 0.5 | 362.09 |
| ben326_0703 | rabbit-RT1A | 198 | 212 | 15 | FQAADKIFLHFNSVT  | smm | 0.4 | 277.22 |
| ben326_0703 | rabbit-RT1A | 295 | 309 | 15 | YLTRKKKVKKLNHFK  | smm | 1   | 533.11 |
| ben326_0703 | rabbit-RT1A | 328 | 342 | 15 | NTFKYDPSQVNALKK  | smm | 0.9 | 506.78 |
| ben326_0703 | rabbit-RT1A | 436 | 450 | 15 | SMVDNNLFSQFISAI  | smm | 0.5 | 345    |
| ben326_0703 | rabbit-RT1A | 644 | 658 | 15 | INFNDKIFSTINNAS  | smm | 0.3 | 242    |
| ben326_0704 | rabbit-RT1A | 8   | 22  | 15 | NDYKDMFVIRPMYFI  | smm | 0.7 | 426.4  |
| ben326_0704 | rabbit-RT1A | 71  | 85  | 15 | LKHIDTKFNEINKSA  | smm | 0.7 | 460.07 |
| ben326_0706 | rabbit-RT1A | 27  | 41  | 15 | LKYFDIEIPFVLKNV  | smm | 0.9 | 491.84 |
| ben326_0706 | rabbit-RT1A | 147 | 161 | 15 | VFFDAEKFDQPIGKW  | smm | 0.7 | 427.39 |
| ben326_0707 | rabbit-RT1A | 45  | 59  | 15 | SVMCEMKSEQLNSHN  | smm | 0.6 | 395.2  |
| ben326_0708 | rabbit-RT1A | 10  | 24  | 15 | ICCSNCSFCLFNKIL  | smm | 0.8 | 476.23 |
| ben326_0708 | rabbit-RT1A | 34  | 48  | 15 | NFSCWFNFSFNLI    | smm | 0.3 | 245.37 |
| ben326_0708 | rabbit-RT1A | 53  | 67  | 15 | NFWLINCSNSFLIFS  | smm | 0.8 | 483.97 |
| ben326_0708 | rabbit-RT1A | 92  | 106 | 15 | LYSLIKSFSNFYKWK  | smm | 0.8 | 475.14 |
| ben326_0709 | rabbit-RT1A | 88  | 102 | 15 | DKTTYLKFSYLEFKN  | smm | 0.7 | 433.33 |



|             |                     |     |     |    |                  |     |     |        |
|-------------|---------------------|-----|-----|----|------------------|-----|-----|--------|
| ben326_0709 | rabbit-RT1A         | 115 | 129 | 15 | DQYINFNFKQELEK   | smm | 0.3 | 216.68 |
| ben326_0709 | rabbit-RT1A         | 145 | 159 | 15 | TNYEQIFLKRFRYKLL | smm | 0.6 | 384.43 |
| ben326_0709 | rabbit-RT1A         | 305 | 319 | 15 | QMPPTNFFNTLENDE  | smm | 0.7 | 445.47 |
| ben326_0709 | rabbit-RT1A         | 446 | 460 | 15 | LEQNPDLLPFFNEDV  | smm | 0.9 | 506.78 |
| ben326_0709 | rabbit-RT1A         | 704 | 718 | 15 | EIFQTYPSINKLIKQ  | smm | 0.6 | 402.55 |
| ben326_0709 | rabbit-RT1A         | 728 | 742 | 15 | TGFFIKKVSLENAT   | smm | 0.7 | 442.4  |
| ben326_0709 | rabbit-RT1A         | 824 | 838 | 15 | KHFILTFKTNMAI    | smm | 0.4 | 263.52 |
| ben326_0710 | rabbit-RT1A         | 19  | 33  | 15 | LHYFVLKSKKLNAGV  | smm | 0.5 | 364.6  |
| ben326_0710 | rabbit-RT1A         | 32  | 46  | 15 | GVFRKIPVSILNSVH  | smm | 0.2 | 170.15 |
| ben326_0710 | rabbit-RT1A         | 76  | 90  | 15 | IAKFHFESIHPFIDG  | smm | 0.9 | 509.12 |
| ben326_0712 | rabbit-RT1A         | 33  | 47  | 15 | TIMVNDKFNQFQFML  | smm | 0.7 | 457.95 |
| ben326_0717 | rabbit-RT1A         | 29  | 43  | 15 | DTFNDKEFVALLKKL  | smm | 0.1 | 81.06  |
| ben326_0718 | rabbit-RT1A         | 52  | 66  | 15 | FDFVTEIFIKVLTGH  | smm | 0.6 | 403.48 |
| ben326_0718 | rabbit-RT1A         | 87  | 101 | 15 | FGYYFYFSDINLFK   | smm | 0.7 | 410.98 |
| ben326_0718 | rabbit-RT1A         | 109 | 123 | 15 | EKELANFVQMLQKKK  | smm | 0.6 | 393.39 |
| ben326_0720 | rabbit-RT1A         | 8   | 22  | 15 | FLFLNYFTNRLLDPI  | smm | 0.5 | 355.48 |
| ben326_0720 | rabbit-RT1A         | 172 | 186 | 15 | KKLAELARSFFLKIK  | smm | 0.8 | 483.97 |
| ben326_0674 | cattle-BoLA-N:00902 | 13  | 24  | 12 | KQTINFNKAIVY     | smm | 0.6 | 498.11 |
| ben326_0674 | cattle-BoLA-N:00902 | 61  | 70  | 10 | YLFANNVNM        | smm | 0.9 | 620.53 |
| ben326_0674 | cattle-BoLA-N:00902 | 69  | 81  | 13 | IMVKNNHIVINTF    | smm | 0.7 | 550.49 |
| ben326_0674 | cattle-BoLA-N:00902 | 83  | 96  | 14 | KQNFLVKSNRKKVY   | smm | 0.5 | 404.72 |
| ben326_0674 | cattle-BoLA-N:00902 | 105 | 118 | 14 | KQISILQANQTIGL   | smm | 0.6 | 499    |
| ben326_0675 | cattle-BoLA-N:00902 | 33  | 41  | 9  | KQNALLNYY        | smm | 0.4 | 266.99 |
| ben326_0675 | cattle-BoLA-N:00902 | 98  | 108 | 11 | QKYSTDSYSRY      | smm | 1   | 816.35 |
| ben326_0675 | cattle-BoLA-N:00902 | 131 | 143 | 13 | KQFCSDNKLNVII    | smm | 0.2 | 75.45  |
| ben326_0675 | cattle-BoLA-N:00902 | 148 | 160 | 13 | KQAISKLSWTLTL    | smm | 0.9 | 795.73 |
| ben326_0675 | cattle-BoLA-N:00902 | 164 | 176 | 13 | FLFSQYNYKSLRF    | smm | 0.3 | 305.59 |
| ben326_0675 | cattle-BoLA-N:00902 | 228 | 241 | 14 | TQIDNYIENSIQSL   | smm | 0.4 | 374.6  |
| ben326_0676 | cattle-BoLA-N:00902 | 3   | 16  | 14 | HKNKQTSQSFMVV    | smm | 0.9 | 768.75 |
| ben326_0676 | cattle-BoLA-N:00902 | 31  | 40  | 10 | YQKLLATVLL       | smm | 0.8 | 597.14 |
| ben326_0676 | cattle-BoLA-N:00902 | 42  | 54  | 13 | NQIGFDSKVYKEF    | smm | 0.8 | 755.11 |
| ben326_0676 | cattle-BoLA-N:00902 | 64  | 77  | 14 | NHFDIVLNDVFITF   | smm | 0.8 | 704.78 |
| ben326_0676 | cattle-BoLA-N:00902 | 111 | 124 | 14 | EQYQKFLTTYNNYF   | smm | 0.3 | 239.62 |
| ben326_0676 | cattle-BoLA-N:00902 | 143 | 155 | 13 | FKSKNTDHLKIVF    | smm | 0.7 | 551.25 |
| ben326_0677 | cattle-BoLA-N:00902 | 29  | 38  | 10 | SIYKTIILSF       | smm | 0.8 | 550.22 |
| ben326_0677 | cattle-BoLA-N:00902 | 41  | 52  | 12 | VSMALLLFLSNY     | smm | 1   | 800.3  |
| ben326_0677 | cattle-BoLA-N:00902 | 50  | 63  | 14 | SNYSIFNKNIENSY   | smm | 0.8 | 693.43 |
| ben326_0677 | cattle-BoLA-N:00902 | 65  | 77  | 13 | FLNFSPVFEQY      | smm | 0.3 | 197.69 |
| ben326_0677 | cattle-BoLA-N:00902 | 81  | 93  | 13 | VLFRIKLLGFLYF    | smm | 1   | 891.02 |
| ben326_0677 | cattle-BoLA-N:00902 | 98  | 109 | 12 | KAYINIEPNKPY     | smm | 0.8 | 590.01 |
| ben326_0677 | cattle-BoLA-N:00902 | 110 | 120 | 11 | LKQYTIWFILY      | smm | 1   | 888.97 |
| ben326_0677 | cattle-BoLA-N:00902 | 123 | 134 | 12 | TSISAFILFFTY     | smm | 1   | 708.74 |
| ben326_0677 | cattle-BoLA-N:00902 | 139 | 149 | 11 | AQNIINLIYSL      | smm | 1   | 815.19 |
| ben326_0677 | cattle-BoLA-N:00902 | 162 | 175 | 14 | FKYKTRKKNPLVY    | smm | 0.2 | 130.26 |
| ben326_0677 | cattle-BoLA-N:00902 | 175 | 185 | 11 | YQNKWSLIVDL      | smm | 0.5 | 433.19 |
| ben326_0677 | cattle-BoLA-N:00902 | 210 | 221 | 12 | YEMPLANNKFYEY    | smm | 0.6 | 448.22 |
| ben326_0677 | cattle-BoLA-N:00902 | 228 | 241 | 14 | IKNFLNLIITSF     | smm | 1   | 886.55 |
| ben326_0677 | cattle-BoLA-N:00902 | 262 | 275 | 14 | KQFSFEIRDKLNLF   | smm | 0.2 | 135.72 |
| ben326_0677 | cattle-BoLA-N:00902 | 273 | 284 | 12 | LNFYLTGVIVVF     | smm | 1   | 784.33 |

|             |                     |     |     |    |                |     |     |        |
|-------------|---------------------|-----|-----|----|----------------|-----|-----|--------|
| ben326_0677 | cattle-BoLA-N:00902 | 313 | 326 | 14 | LLFSLNIIITIVY  | smm | 0.7 | 611.52 |
| ben326_0677 | cattle-BoLA-N:00902 | 330 | 343 | 14 | KQFKNRLNSPLIKI | smm | 1   | 865.69 |
| ben326_0677 | cattle-BoLA-N:00902 | 370 | 380 | 11 | SMINLLITIVL    | smm | 0.5 | 465.25 |
| ben326_0677 | cattle-BoLA-N:00902 | 383 | 394 | 12 | ISYYWHIKSSRF   | smm | 0.4 | 253.37 |
| ben326_0677 | cattle-BoLA-N:00902 | 392 | 405 | 14 | SRFNYYNYLLITL  | smm | 0.4 | 354.23 |
| ben326_0677 | cattle-BoLA-N:00902 | 408 | 417 | 10 | IMIFIISLVF     | smm | 0.7 | 476.24 |
| ben326_0677 | cattle-BoLA-N:00902 | 436 | 447 | 12 | LKANLLQIISIF   | smm | 1   | 798.66 |
| ben326_0677 | cattle-BoLA-N:00902 | 449 | 462 | 14 | VAFQIINVYPLTY  | smm | 0.7 | 614.09 |
| ben326_0677 | cattle-BoLA-N:00902 | 462 | 474 | 13 | YMLITSIKISKTF  | smm | 0.7 | 626.63 |
| ben326_0678 | cattle-BoLA-N:00902 | 8   | 20  | 13 | LMYASSSTLLLPI  | smm | 0.3 | 176.26 |
| ben326_0678 | cattle-BoLA-N:00902 | 78  | 89  | 12 | SQLKKENISIIF   | smm | 0.6 | 427.11 |
| ben326_0678 | cattle-BoLA-N:00902 | 147 | 160 | 14 | FDMSGTRIVNDLDY | smm | 0.9 | 829.51 |
| ben326_0678 | cattle-BoLA-N:00902 | 234 | 244 | 11 | AALKGFTLPVY    | smm | 1   | 873.66 |
| ben326_0678 | cattle-BoLA-N:00902 | 294 | 306 | 13 | AAIQTYQVNFTIY  | smm | 1   | 900.82 |
| ben326_0678 | cattle-BoLA-N:00902 | 321 | 334 | 14 | QLFNKWDEKQIQSY | smm | 0.5 | 450.55 |
| ben326_0678 | cattle-BoLA-N:00902 | 331 | 344 | 14 | IQSYISAQLNQLRL | smm | 0.6 | 525.62 |
| ben326_0678 | cattle-BoLA-N:00902 | 351 | 361 | 11 | SQIEKQLSQPL    | smm | 0.2 | 108.13 |
| ben326_0678 | cattle-BoLA-N:00902 | 420 | 430 | 11 | SESGTMWIMDY    | smm | 0.9 | 754.12 |
| ben326_0678 | cattle-BoLA-N:00902 | 526 | 534 | 9  | TKYSEAGLF      | smm | 0.6 | 496.6  |
| ben326_0678 | cattle-BoLA-N:00902 | 621 | 634 | 14 | KAYRDLDSLIVGY  | smm | 0.6 | 523.81 |
| ben326_0678 | cattle-BoLA-N:00902 | 655 | 667 | 13 | KKYDFSLWINNEY  | smm | 0.3 | 267.88 |
| ben326_0678 | cattle-BoLA-N:00902 | 686 | 696 | 11 | YELEKGNFFSY    | smm | 0.4 | 379.95 |
| ben326_0678 | cattle-BoLA-N:00902 | 696 | 709 | 14 | YQIGYRSFIDKPGL | smm | 0.5 | 434.4  |
| ben326_0678 | cattle-BoLA-N:00902 | 735 | 748 | 14 | KKYFNYLEILPRF  | smm | 0.9 | 756.45 |
| ben326_0678 | cattle-BoLA-N:00902 | 787 | 800 | 14 | RSNGYDYKNLFGPY | smm | 0.3 | 289.5  |
| ben326_0678 | cattle-BoLA-N:00902 | 800 | 809 | 10 | YKLGQYDLIY     | smm | 0.9 | 629.54 |
| ben326_0678 | cattle-BoLA-N:00902 | 819 | 829 | 11 | KSYREALLKKY    | smm | 0.9 | 771.67 |
| ben326_0678 | cattle-BoLA-N:00902 | 827 | 838 | 12 | KKYNNDIKSALF   | smm | 0.4 | 320.15 |
| ben326_0679 | cattle-BoLA-N:00902 | 22  | 34  | 13 | ASVSFGSVFYYSF  | smm | 0.9 | 813.07 |
| ben326_0679 | cattle-BoLA-N:00902 | 167 | 178 | 12 | YQNHTVNKILSV   | smm | 1   | 713.51 |
| ben326_0679 | cattle-BoLA-N:00902 | 236 | 249 | 14 | RQNSGAFQNTLERY | smm | 0.4 | 349.35 |
| ben326_0679 | cattle-BoLA-N:00902 | 294 | 306 | 13 | SKFTKIASTSEKY  | smm | 0.9 | 761.33 |
| ben326_0679 | cattle-BoLA-N:00902 | 349 | 359 | 11 | SEYRVFDYDEY    | smm | 0.7 | 604.25 |
| ben326_0679 | cattle-BoLA-N:00902 | 386 | 398 | 13 | KKYNFKASDGIRF  | smm | 0.4 | 322.33 |
| ben326_0679 | cattle-BoLA-N:00902 | 439 | 449 | 11 | LQKDGEQITSY    | smm | 0.4 | 371.59 |
| ben326_0679 | cattle-BoLA-N:00902 | 531 | 542 | 12 | IDYNVSAEYSRY   | smm | 0.9 | 694.76 |
| ben326_0679 | cattle-BoLA-N:00902 | 547 | 556 | 10 | TRITFNTLAF     | smm | 0.7 | 477.87 |
| ben326_0679 | cattle-BoLA-N:00902 | 564 | 577 | 14 | GSYERINDGLRMVY | smm | 0.3 | 260.58 |
| ben326_0679 | cattle-BoLA-N:00902 | 601 | 611 | 11 | GQNSYPTGLDF    | smm | 0.6 | 532.21 |
| ben326_0679 | cattle-BoLA-N:00902 | 636 | 644 | 9  | RKITELTLY      | smm | 1   | 773.55 |
| ben326_0679 | cattle-BoLA-N:00902 | 737 | 749 | 13 | WGYKVSTASDRSF  | smm | 1   | 869.54 |
| ben326_0680 | cattle-BoLA-N:00902 | 60  | 69  | 10 | LKFKDSRGSY     | smm | 0.7 | 477.21 |
| ben326_0680 | cattle-BoLA-N:00902 | 78  | 89  | 12 | SQLEKSQVEITF   | smm | 0.3 | 170.98 |
| ben326_0680 | cattle-BoLA-N:00902 | 146 | 156 | 11 | FRNSSVNTISY    | smm | 0.5 | 389.06 |
| ben326_0680 | cattle-BoLA-N:00902 | 154 | 166 | 13 | ISYFDGAGGFDSY  | smm | 0.3 | 194.41 |
| ben326_0680 | cattle-BoLA-N:00902 | 170 | 182 | 13 | SQKDRFKYDNEKY  | smm | 0.9 | 804.87 |
| ben326_0680 | cattle-BoLA-N:00902 | 230 | 240 | 11 | AALKGFTLPVY    | smm | 1   | 873.66 |
| ben326_0680 | cattle-BoLA-N:00902 | 286 | 298 | 13 | YKTAAIQTFQVSF  | smm | 0.7 | 541.51 |

|             |                     |     |     |    |                |     |     |        |
|-------------|---------------------|-----|-----|----|----------------|-----|-----|--------|
| ben326_0680 | cattle-BoLA-N:00902 | 316 | 329 | 14 | KLFESWDDKQIENY | smm | 0.6 | 513.57 |
| ben326_0680 | cattle-BoLA-N:00902 | 393 | 403 | 11 | VKWQQKQIQEY    | smm | 1   | 902.28 |
| ben326_0680 | cattle-BoLA-N:00902 | 410 | 423 | 14 | KQFQASESGTMWIM | smm | 0.2 | 123.08 |
| ben326_0680 | cattle-BoLA-N:00902 | 588 | 601 | 14 | VQFVSDSLLEAAY  | smm | 0.2 | 181.04 |
| ben326_0680 | cattle-BoLA-N:00902 | 622 | 632 | 11 | KKLESLYIVGY    | smm | 1   | 817.25 |
| ben326_0680 | cattle-BoLA-N:00902 | 642 | 655 | 14 | DQYEDHTQLSTKKY | smm | 0.9 | 807.41 |
| ben326_0680 | cattle-BoLA-N:00902 | 665 | 677 | 13 | SKYYKLANKEGY   | smm | 0.7 | 592.56 |
| ben326_0680 | cattle-BoLA-N:00902 | 681 | 694 | 14 | FSKDELEKGNFLSY | smm | 1   | 852.43 |
| ben326_0680 | cattle-BoLA-N:00902 | 694 | 707 | 14 | YQIGYRSFIDKPGL | smm | 0.5 | 434.4  |
| ben326_0680 | cattle-BoLA-N:00902 | 731 | 744 | 14 | KKYFNYLEILPRF  | smm | 0.9 | 756.45 |
| ben326_0680 | cattle-BoLA-N:00902 | 783 | 796 | 14 | RSNGYDYKGLFGKY | smm | 0.8 | 711.89 |
| ben326_0680 | cattle-BoLA-N:00902 | 815 | 825 | 11 | KSYREVMKVKY    | smm | 0.7 | 595.64 |
| ben326_0680 | cattle-BoLA-N:00902 | 831 | 844 | 14 | ALFDKGFDPHEEF  | smm | 0.9 | 767.77 |
| ben326_0681 | cattle-BoLA-N:00902 | 24  | 34  | 11 | LSFGSVIYYSF    | smm | 0.6 | 501.96 |
| ben326_0681 | cattle-BoLA-N:00902 | 166 | 175 | 10 | YQNQSVGKIL     | smm | 0.9 | 629.66 |
| ben326_0681 | cattle-BoLA-N:00902 | 203 | 213 | 11 | GLFNNSLFNVF    | smm | 0.5 | 413.82 |
| ben326_0681 | cattle-BoLA-N:00902 | 235 | 248 | 14 | NQNASVYENTLERY | smm | 1   | 861.12 |
| ben326_0681 | cattle-BoLA-N:00902 | 343 | 355 | 13 | IQNDNSNYRTFSY  | smm | 0.2 | 84.73  |
| ben326_0681 | cattle-BoLA-N:00902 | 426 | 438 | 13 | YAYGKTKELIKKF  | smm | 1   | 863.11 |
| ben326_0681 | cattle-BoLA-N:00902 | 496 | 504 | 9  | KKIDDLISLY     | smm | 1   | 767.18 |
| ben326_0681 | cattle-BoLA-N:00902 | 511 | 521 | 11 | RRSWSYNPLAL    | smm | 1   | 809.07 |
| ben326_0681 | cattle-BoLA-N:00902 | 530 | 538 | 9  | IDYNVSAEY      | smm | 0.7 | 593.51 |
| ben326_0681 | cattle-BoLA-N:00902 | 539 | 550 | 12 | SKYEKISTRITF   | smm | 0.2 | 136.6  |
| ben326_0681 | cattle-BoLA-N:00902 | 564 | 577 | 14 | GDYSRINDGLRMVY | smm | 1   | 843.69 |
| ben326_0681 | cattle-BoLA-N:00902 | 603 | 611 | 9  | NSYPTGLDF      | smm | 1   | 763.38 |
| ben326_0681 | cattle-BoLA-N:00902 | 634 | 644 | 11 | RSRKITELTLY    | smm | 1   | 891.75 |
| ben326_0681 | cattle-BoLA-N:00902 | 703 | 714 | 12 | YLSKYFKYGESF   | smm | 0.9 | 695.26 |
| ben326_0685 | cattle-BoLA-N:00902 | 99  | 109 | 11 | SESGTMWIMDY    | smm | 0.9 | 754.12 |
| ben326_0685 | cattle-BoLA-N:00902 | 234 | 247 | 14 | YSIWSESNEVSHKY | smm | 1   | 885.03 |
| ben326_0685 | cattle-BoLA-N:00902 | 269 | 282 | 14 | IQFESESLDDKKY  | smm | 0.3 | 185.33 |
| ben326_0685 | cattle-BoLA-N:00902 | 280 | 291 | 12 | KKYKTFDRKLDLDF | smm | 1   | 765.53 |
| ben326_0685 | cattle-BoLA-N:00902 | 329 | 341 | 13 | KQLQNREYDYSW   | smm | 1   | 855.7  |
| ben326_0685 | cattle-BoLA-N:00902 | 363 | 375 | 13 | KEYETDKGNFFSY  | smm | 0.4 | 310.74 |
| ben326_0685 | cattle-BoLA-N:00902 | 375 | 388 | 14 | YQIGYRSFIDKPGL | smm | 0.5 | 434.4  |
| ben326_0685 | cattle-BoLA-N:00902 | 412 | 425 | 14 | KKYFNYLEILPRF  | smm | 0.9 | 756.45 |
| ben326_0686 | cattle-BoLA-N:00902 | 60  | 69  | 10 | IKFKNSLGSY     | smm | 0.2 | 116.14 |
| ben326_0686 | cattle-BoLA-N:00902 | 83  | 93  | 11 | NQIEIIFKDPY    | smm | 0.4 | 379.44 |
| ben326_0686 | cattle-BoLA-N:00902 | 108 | 121 | 14 | RSNGFASINEATLY | smm | 0.5 | 469.24 |
| ben326_0687 | cattle-BoLA-N:00902 | 14  | 26  | 13 | YALLASLATSLSF  | smm | 0.8 | 728.34 |
| ben326_0687 | cattle-BoLA-N:00902 | 29  | 41  | 13 | VIYYSFSDANISF  | smm | 0.8 | 747.61 |
| ben326_0687 | cattle-BoLA-N:00902 | 167 | 178 | 12 | YQNHIVEKILSI   | smm | 0.6 | 503.14 |
| ben326_0687 | cattle-BoLA-N:00902 | 237 | 250 | 14 | NQNSNFFNSSIERY | smm | 0.8 | 678.16 |
| ben326_0687 | cattle-BoLA-N:00902 | 269 | 278 | 10 | VQYPKLGGEF     | smm | 0.3 | 174.02 |
| ben326_0687 | cattle-BoLA-N:00902 | 295 | 307 | 13 | SKFTKIASTSEKY  | smm | 0.9 | 761.33 |
| ben326_0687 | cattle-BoLA-N:00902 | 345 | 357 | 13 | LQRDNSTYRVFDY  | smm | 0.5 | 376.8  |
| ben326_0687 | cattle-BoLA-N:00902 | 440 | 450 | 11 | FKSHSEKITSY    | smm | 0.9 | 778.79 |
| ben326_0687 | cattle-BoLA-N:00902 | 538 | 550 | 13 | AQYSSHQKITTRI  | smm | 0.6 | 503.27 |
| ben326_0687 | cattle-BoLA-N:00902 | 565 | 578 | 14 | NSYQRINDGLRMVY | smm | 0.5 | 416.01 |

|             |                     |     |     |    |                 |     |     |        |
|-------------|---------------------|-----|-----|----|-----------------|-----|-----|--------|
| ben326_0687 | cattle-BoLA-N:00902 | 701 | 710 | 10 | RQNLEKYFEY      | smm | 0.6 | 450.93 |
| ben326_0690 | cattle-BoLA-N:00902 | 172 | 185 | 14 | TKYTNNSQKERFKF  | smm | 0.9 | 775.88 |
| ben326_0690 | cattle-BoLA-N:00902 | 225 | 236 | 12 | KQAESSNFDSYY    | smm | 0.2 | 146.12 |
| ben326_0690 | cattle-BoLA-N:00902 | 238 | 248 | 11 | AALKGFTLPVY     | smm | 1   | 873.66 |
| ben326_0690 | cattle-BoLA-N:00902 | 294 | 306 | 13 | YKTAAIQTFQVSF   | smm | 0.7 | 541.51 |
| ben326_0690 | cattle-BoLA-N:00902 | 324 | 337 | 14 | KLFRWTDQIKQY    | smm | 0.5 | 474.98 |
| ben326_0690 | cattle-BoLA-N:00902 | 339 | 351 | 13 | ARQLWQLEQNLKY   | smm | 0.6 | 486.75 |
| ben326_0690 | cattle-BoLA-N:00902 | 401 | 411 | 11 | VQWQQEEIEKY     | smm | 1   | 886.37 |
| ben326_0690 | cattle-BoLA-N:00902 | 420 | 433 | 14 | FQTSSESGTMWIMDY | smm | 0.5 | 466.02 |
| ben326_0690 | cattle-BoLA-N:00902 | 479 | 491 | 13 | FNINSFDKNFTTF   | smm | 0.9 | 771.02 |
| ben326_0690 | cattle-BoLA-N:00902 | 500 | 510 | 11 | SKISNAVTAIY     | smm | 0.5 | 430.25 |
| ben326_0690 | cattle-BoLA-N:00902 | 589 | 598 | 10 | YQNSKSKVQF      | smm | 0.4 | 227.21 |
| ben326_0690 | cattle-BoLA-N:00902 | 606 | 618 | 13 | DQFYNTFDRKLDLDF | smm | 0.7 | 639.74 |
| ben326_0690 | cattle-BoLA-N:00902 | 627 | 640 | 14 | KNYKDLNSFYILGY  | smm | 0.7 | 607.46 |
| ben326_0690 | cattle-BoLA-N:00902 | 656 | 668 | 13 | KQLDYQKYDFSLW   | smm | 0.9 | 832.53 |
| ben326_0690 | cattle-BoLA-N:00902 | 673 | 685 | 13 | YKYYKNIVKKEGY   | smm | 0.3 | 266.17 |
| ben326_0690 | cattle-BoLA-N:00902 | 690 | 702 | 13 | KDYELEKGNFLSY   | smm | 0.8 | 728.58 |
| ben326_0690 | cattle-BoLA-N:00902 | 702 | 715 | 14 | YQIGYRSFIDKPGL  | smm | 0.5 | 434.4  |
| ben326_0690 | cattle-BoLA-N:00902 | 723 | 733 | 11 | HRIGNDLTYLY     | smm | 0.7 | 574.18 |
| ben326_0690 | cattle-BoLA-N:00902 | 738 | 746 | 9  | KKVKHYFNY       | smm | 0.7 | 596.21 |
| ben326_0690 | cattle-BoLA-N:00902 | 772 | 782 | 11 | KLIAVFHAANY     | smm | 0.7 | 551.37 |
| ben326_0690 | cattle-BoLA-N:00902 | 793 | 806 | 14 | RSNGYDYNLFGNY   | smm | 0.9 | 759.24 |
| ben326_0690 | cattle-BoLA-N:00902 | 806 | 815 | 10 | YKLGQYDLIY      | smm | 0.9 | 629.54 |
| ben326_0690 | cattle-BoLA-N:00902 | 825 | 835 | 11 | RSYREVMQKLY     | smm | 0.4 | 331.54 |
| ben326_0690 | cattle-BoLA-N:00902 | 841 | 854 | 14 | ALFANGFNEIPESF  | smm | 0.6 | 536.76 |
| ben326_0691 | cattle-BoLA-N:00902 | 12  | 24  | 13 | LMYALLASLATSLS  | smm | 0.2 | 128.67 |
| ben326_0691 | cattle-BoLA-N:00902 | 24  | 32  | 9  | LSFGSVIYY       | smm | 0.7 | 548.07 |
| ben326_0691 | cattle-BoLA-N:00902 | 167 | 178 | 12 | YQNHTVGKIISI    | smm | 0.6 | 511.34 |
| ben326_0691 | cattle-BoLA-N:00902 | 205 | 215 | 11 | GLFNNTLMQVF     | smm | 0.5 | 416.5  |
| ben326_0691 | cattle-BoLA-N:00902 | 295 | 307 | 13 | SKFTTIASRSEKY   | smm | 0.7 | 607.21 |
| ben326_0691 | cattle-BoLA-N:00902 | 336 | 345 | 10 | AQFNTVTSRM      | smm | 0.2 | 85.65  |
| ben326_0691 | cattle-BoLA-N:00902 | 344 | 357 | 14 | RMQRDNSEYRIFDY  | smm | 0.5 | 426.11 |
| ben326_0691 | cattle-BoLA-N:00902 | 383 | 391 | 9  | SQFTSKFNF       | smm | 0.3 | 139.8  |
| ben326_0691 | cattle-BoLA-N:00902 | 512 | 523 | 12 | LRNSWSYNPLSF    | smm | 0.6 | 425.55 |
| ben326_0691 | cattle-BoLA-N:00902 | 548 | 557 | 10 | TRITFNTLAF      | smm | 0.7 | 477.87 |
| ben326_0691 | cattle-BoLA-N:00902 | 566 | 579 | 14 | QNYQRINDGLRMVY  | smm | 0.8 | 728.79 |
| ben326_0691 | cattle-BoLA-N:00902 | 619 | 627 | 9  | IKSLRGLIF       | smm | 0.9 | 730.99 |
| ben326_0691 | cattle-BoLA-N:00902 | 638 | 646 | 9  | RKITELTLY       | smm | 1   | 773.55 |
| ben326_0691 | cattle-BoLA-N:00902 | 710 | 718 | 9  | FEYSESLKF       | smm | 0.5 | 422.08 |
| ben326_0691 | cattle-BoLA-N:00902 | 739 | 751 | 13 | WGYSVSDSSTRSF   | smm | 0.8 | 733.72 |
| ben326_0692 | cattle-BoLA-N:00902 | 44  | 52  | 9  | SQKDKLKF        | smm | 0.9 | 700.56 |
| ben326_0693 | cattle-BoLA-N:00902 | 18  | 31  | 14 | KQMSSLQNQLNELL  | smm | 0.5 | 460.82 |
| ben326_0693 | cattle-BoLA-N:00902 | 72  | 84  | 13 | SQINDSEKIIFKL   | smm | 1   | 898.25 |
| ben326_0693 | cattle-BoLA-N:00902 | 115 | 123 | 9  | FQKLSDTLY       | smm | 0.6 | 527.17 |
| ben326_0694 | cattle-BoLA-N:00902 | 52  | 64  | 13 | ISFCLAGKADDIY   | smm | 0.8 | 677.91 |
| ben326_0694 | cattle-BoLA-N:00902 | 150 | 159 | 10 | RQIISHNLRY      | smm | 0.3 | 170.34 |
| ben326_0694 | cattle-BoLA-N:00902 | 170 | 180 | 11 | TLYSTAKNSEY     | smm | 0.8 | 650.33 |
| ben326_0694 | cattle-BoLA-N:00902 | 184 | 192 | 9  | HLFLLGFSF       | smm | 1   | 786.76 |

|             |                     |     |     |    |                |     |     |        |
|-------------|---------------------|-----|-----|----|----------------|-----|-----|--------|
| ben326_0694 | cattle-BoLA-N:00902 | 214 | 225 | 12 | KLLSHNLDKQVY   | smm | 1   | 804.03 |
| ben326_0694 | cattle-BoLA-N:00902 | 300 | 312 | 13 | KQLELIYNQTDLF  | smm | 0.3 | 255.02 |
| ben326_0696 | cattle-BoLA-N:00902 | 28  | 36  | 9  | VRIPKVKPF      | smm | 1   | 752.81 |
| ben326_0697 | cattle-BoLA-N:00902 | 25  | 37  | 13 | KSIKSFLNQNLY   | smm | 0.7 | 602.15 |
| ben326_0698 | cattle-BoLA-N:00902 | 12  | 22  | 11 | ARQNHYAIGAF    | smm | 0.6 | 519.32 |
| ben326_0698 | cattle-BoLA-N:00902 | 46  | 55  | 10 | AMITESAAKY     | smm | 0.3 | 196.34 |
| ben326_0698 | cattle-BoLA-N:00902 | 89  | 101 | 13 | IKWACDNEFSSVM  | smm | 0.7 | 613.36 |
| ben326_0698 | cattle-BoLA-N:00902 | 241 | 251 | 11 | KQWFKENPTSY    | smm | 0.2 | 131.45 |
| ben326_0698 | cattle-BoLA-N:00902 | 254 | 264 | 11 | RKFGFRFAEQM    | smm | 0.4 | 357.92 |
| ben326_0699 | cattle-BoLA-N:00902 | 23  | 36  | 14 | RQLAKLLSSTIQT  | smm | 0.7 | 610.36 |
| ben326_0699 | cattle-BoLA-N:00902 | 89  | 99  | 11 | SEYVSNGLIF     | smm | 0.9 | 735.25 |
| ben326_0699 | cattle-BoLA-N:00902 | 172 | 182 | 11 | GMNNLSSQHFY    | smm | 0.5 | 396.98 |
| ben326_0700 | cattle-BoLA-N:00902 | 84  | 94  | 11 | LQINIDKINGF    | smm | 0.6 | 499.01 |
| ben326_0700 | cattle-BoLA-N:00902 | 111 | 124 | 14 | KRFVKSISAIFGPL | smm | 0.7 | 587.42 |
| ben326_0700 | cattle-BoLA-N:00902 | 176 | 189 | 14 | KLIGVMVIWSTTRY | smm | 1   | 874.03 |
| ben326_0700 | cattle-BoLA-N:00902 | 203 | 216 | 14 | IMISPIPEQGLHL  | smm | 0.6 | 516.62 |
| ben326_0700 | cattle-BoLA-N:00902 | 243 | 253 | 11 | ISYFQKLMNKY    | smm | 0.8 | 682.71 |
| ben326_0700 | cattle-BoLA-N:00902 | 277 | 289 | 13 | FVIGSIMSIIESY  | smm | 0.9 | 771.52 |
| ben326_0700 | cattle-BoLA-N:00902 | 290 | 302 | 13 | VLKAFNWFVTLPY  | smm | 0.8 | 752.22 |
| ben326_0700 | cattle-BoLA-N:00902 | 352 | 362 | 11 | AQMGIATIAVGI   | smm | 0.3 | 229.88 |
| ben326_0700 | cattle-BoLA-N:00902 | 389 | 401 | 13 | CIYAINLPRFKPF  | smm | 1   | 880.32 |
| ben326_0700 | cattle-BoLA-N:00902 | 426 | 437 | 12 | AGLGGVVGFLAY   | smm | 0.9 | 703.71 |
| ben326_0700 | cattle-BoLA-N:00902 | 450 | 462 | 13 | VSVLGLILITYVF  | smm | 0.9 | 812.52 |
| ben326_0700 | cattle-BoLA-N:00902 | 508 | 516 | 9  | KQTEIIKTY      | smm | 0.5 | 401.37 |
| ben326_0700 | cattle-BoLA-N:00902 | 527 | 536 | 10 | KKFSKQTLKY     | smm | 0.5 | 351.32 |
| ben326_0700 | cattle-BoLA-N:00902 | 611 | 624 | 14 | TKYYSAINKIALDY | smm | 0.9 | 745.2  |
| ben326_0701 | cattle-BoLA-N:00902 | 124 | 132 | 9  | KAYSIVDSF      | smm | 1   | 758.2  |
| ben326_0701 | cattle-BoLA-N:00902 | 210 | 222 | 13 | YKIENLAGAGDSM  | smm | 0.8 | 724.03 |
| ben326_0701 | cattle-BoLA-N:00902 | 221 | 230 | 10 | SMIAGFITKY     | smm | 0.2 | 90.03  |
| ben326_0701 | cattle-BoLA-N:00902 | 231 | 242 | 12 | LQTNNDYIKALKF  | smm | 1   | 744.61 |
| ben326_0701 | cattle-BoLA-N:00902 | 242 | 254 | 13 | FSIICGSATAFSY  | smm | 1   | 888.76 |
| ben326_0702 | cattle-BoLA-N:00902 | 1   | 14  | 14 | MQSKIYINNIINKL | smm | 0.5 | 462.36 |
| ben326_0702 | cattle-BoLA-N:00902 | 17  | 30  | 14 | LQYEIKAFNNAKLF | smm | 0.2 | 120.49 |
| ben326_0702 | cattle-BoLA-N:00902 | 93  | 106 | 14 | KQIYKDYLGYNFKF | smm | 0.3 | 216.63 |
| ben326_0702 | cattle-BoLA-N:00902 | 120 | 128 | 9  | IKNPYNLNF      | smm | 1   | 757.71 |
| ben326_0702 | cattle-BoLA-N:00902 | 141 | 153 | 13 | LKIKRRFNIKSPF  | smm | 0.8 | 722.43 |
| ben326_0702 | cattle-BoLA-N:00902 | 153 | 163 | 11 | FNFKSLLLIY     | smm | 0.5 | 394.75 |
| ben326_0703 | cattle-BoLA-N:00902 | 78  | 89  | 12 | NMFIDYLNDSVDF  | smm | 0.9 | 644.24 |
| ben326_0703 | cattle-BoLA-N:00902 | 136 | 144 | 9  | KKLSNIYKF      | smm | 0.9 | 689.18 |
| ben326_0703 | cattle-BoLA-N:00902 | 198 | 208 | 11 | FQAADKIFLHF    | smm | 0.5 | 391.79 |
| ben326_0703 | cattle-BoLA-N:00902 | 212 | 221 | 10 | TRIAFYLHYY     | smm | 0.8 | 598.33 |
| ben326_0703 | cattle-BoLA-N:00902 | 283 | 296 | 14 | YQTYTDELNIAWYL | smm | 0.8 | 717.95 |
| ben326_0703 | cattle-BoLA-N:00902 | 330 | 343 | 14 | FKYDPSQVNALKKF | smm | 0.9 | 751.13 |
| ben326_0703 | cattle-BoLA-N:00902 | 368 | 379 | 12 | KLFKKVYPNSNF   | smm | 0.6 | 435.84 |
| ben326_0703 | cattle-BoLA-N:00902 | 408 | 417 | 10 | LQYDAETEFK     | smm | 0.3 | 194.11 |
| ben326_0703 | cattle-BoLA-N:00902 | 436 | 446 | 11 | SMVDNNLFSQF    | smm | 0.3 | 229.99 |
| ben326_0703 | cattle-BoLA-N:00902 | 463 | 474 | 12 | NQLPSVEIGNVF   | smm | 0.6 | 490.26 |
| ben326_0703 | cattle-BoLA-N:00902 | 492 | 505 | 14 | HRQANNSKIVELAY | smm | 0.9 | 777.04 |

|             |                     |     |     |    |                |     |     |        |
|-------------|---------------------|-----|-----|----|----------------|-----|-----|--------|
| ben326_0703 | cattle-BoLA-N:00902 | 505 | 518 | 14 | YMIKDNNFDLKKLY | smm | 0.4 | 364.19 |
| ben326_0703 | cattle-BoLA-N:00902 | 525 | 535 | 11 | NQSKTDLQTIF    | smm | 0.7 | 606.59 |
| ben326_0703 | cattle-BoLA-N:00902 | 562 | 570 | 9  | YKIQIISPF      | smm | 0.3 | 171.83 |
| ben326_0703 | cattle-BoLA-N:00902 | 602 | 610 | 9  | IQINNSEYY      | smm | 0.5 | 421.71 |
| ben326_0703 | cattle-BoLA-N:00902 | 610 | 618 | 9  | YQKDKVMYL      | smm | 0.5 | 431.34 |
| ben326_0703 | cattle-BoLA-N:00902 | 676 | 685 | 10 | SEFEKVILVL     | smm | 0.8 | 567    |
| ben326_0703 | cattle-BoLA-N:00902 | 739 | 752 | 14 | KLMYKKRKKSHYSY | smm | 0.8 | 673.65 |
| ben326_0704 | cattle-BoLA-N:00902 | 12  | 20  | 9  | DMFVIRPMY      | smm | 0.9 | 699.33 |
| ben326_0704 | cattle-BoLA-N:00902 | 22  | 35  | 14 | ISFLGVLETIALKY | smm | 0.4 | 376.65 |
| ben326_0704 | cattle-BoLA-N:00902 | 47  | 59  | 13 | IMFKEKQDILDEF  | smm | 0.4 | 356.99 |
| ben326_0706 | cattle-BoLA-N:00902 | 27  | 36  | 10 | LKYFDIEIPF     | smm | 0.7 | 508.55 |
| ben326_0706 | cattle-BoLA-N:00902 | 59  | 72  | 14 | IQLGYKKNDNYIQL | smm | 1   | 871.08 |
| ben326_0706 | cattle-BoLA-N:00902 | 88  | 97  | 10 | LKINSFYEAF     | smm | 0.9 | 640.54 |
| ben326_0706 | cattle-BoLA-N:00902 | 159 | 172 | 14 | GKWNTSKVTDMSAM | smm | 0.9 | 807.47 |
| ben326_0707 | cattle-BoLA-N:00902 | 39  | 50  | 12 | KQNLLSVMCEM    | smm | 0.8 | 596.59 |
| ben326_0707 | cattle-BoLA-N:00902 | 61  | 69  | 9  | KKSIFITVY      | smm | 0.8 | 675.44 |
| ben326_0708 | cattle-BoLA-N:00902 | 4   | 17  | 14 | HFFNWLICCSNCSF | smm | 0.9 | 794.7  |
| ben326_0708 | cattle-BoLA-N:00902 | 23  | 35  | 13 | ILYWFSNCNLINF  | smm | 1   | 906.42 |
| ben326_0708 | cattle-BoLA-N:00902 | 41  | 54  | 14 | FSFNLFIFDSNSNF | smm | 0.7 | 596.81 |
| ben326_0708 | cattle-BoLA-N:00902 | 80  | 93  | 14 | SEISIVDSNFFLY  | smm | 0.3 | 293.01 |
| ben326_0708 | cattle-BoLA-N:00902 | 91  | 103 | 13 | LLYSLIKSFSNFY  | smm | 0.8 | 714.96 |
| ben326_0709 | cattle-BoLA-N:00902 | 10  | 21  | 12 | KQATDFNEQLIF   | smm | 0.6 | 493.47 |
| ben326_0709 | cattle-BoLA-N:00902 | 35  | 45  | 11 | KQTLEKMINLY    | smm | 0.8 | 658.27 |
| ben326_0709 | cattle-BoLA-N:00902 | 73  | 81  | 9  | SFYDAYLEF      | smm | 0.7 | 574.2  |
| ben326_0709 | cattle-BoLA-N:00902 | 115 | 123 | 9  | DQYINFNFY      | smm | 1   | 740.22 |
| ben326_0709 | cattle-BoLA-N:00902 | 229 | 239 | 11 | KRLKMSFKTIF    | smm | 0.8 | 699.06 |
| ben326_0709 | cattle-BoLA-N:00902 | 253 | 264 | 12 | LMLSPLTVSYLF   | smm | 0.5 | 382.58 |
| ben326_0709 | cattle-BoLA-N:00902 | 280 | 292 | 13 | SQIKPETAISLFL  | smm | 0.3 | 176.23 |
| ben326_0709 | cattle-BoLA-N:00902 | 321 | 334 | 14 | VQKTNIEEDISSGY | smm | 0.6 | 544.68 |
| ben326_0709 | cattle-BoLA-N:00902 | 348 | 358 | 11 | IRLKWYHRSKF    | smm | 1   | 895.32 |
| ben326_0709 | cattle-BoLA-N:00902 | 368 | 376 | 9  | FIYNDLITF      | smm | 1   | 739.48 |
| ben326_0709 | cattle-BoLA-N:00902 | 390 | 402 | 13 | FIYSNPNQQTDEY  | smm | 0.9 | 822.91 |
| ben326_0709 | cattle-BoLA-N:00902 | 409 | 419 | 11 | LQTLKQILTY     | smm | 0.6 | 515.27 |
| ben326_0709 | cattle-BoLA-N:00902 | 419 | 430 | 12 | YQNKYSFGIVVF   | smm | 0.2 | 50.06  |
| ben326_0709 | cattle-BoLA-N:00902 | 447 | 455 | 9  | EQNPDLLPF      | smm | 0.5 | 423.26 |
| ben326_0709 | cattle-BoLA-N:00902 | 609 | 622 | 14 | NKFLLAIECDGSAF | smm | 0.7 | 653.88 |
| ben326_0709 | cattle-BoLA-N:00902 | 633 | 646 | 14 | RLYQQVLESRGWAF | smm | 0.2 | 96.01  |
| ben326_0709 | cattle-BoLA-N:00902 | 717 | 730 | 14 | KQVGYHSLANQTGF | smm | 0.3 | 198.08 |
| ben326_0709 | cattle-BoLA-N:00902 | 745 | 758 | 14 | ILNQIGPLLLTSVY | smm | 0.4 | 373.27 |
| ben326_0709 | cattle-BoLA-N:00902 | 780 | 793 | 14 | RMISSIGTLDKDQF | smm | 0.6 | 550.41 |
| ben326_0709 | cattle-BoLA-N:00902 | 857 | 868 | 12 | SQNSIDKIQHVL   | smm | 0.9 | 691.35 |
| ben326_0710 | cattle-BoLA-N:00902 | 41  | 52  | 12 | ILNSVHTPVQPY   | smm | 0.5 | 387.23 |
| ben326_0710 | cattle-BoLA-N:00902 | 74  | 87  | 14 | KKIAKFHFESIHPF | smm | 0.4 | 368.5  |
| ben326_0710 | cattle-BoLA-N:00902 | 97  | 109 | 13 | LLINYQLMRNGYY  | smm | 0.8 | 724.63 |
| ben326_0710 | cattle-BoLA-N:00902 | 113 | 125 | 13 | IKFENRNLYYQAF  | smm | 0.3 | 191.72 |
| ben326_0710 | cattle-BoLA-N:00902 | 136 | 144 | 9  | TMIKLIANF      | smm | 0.7 | 583.74 |
| ben326_0713 | cattle-BoLA-N:00902 | 3   | 16  | 14 | SMFNNASSFNQDLL | smm | 0.3 | 283.43 |
| ben326_0713 | cattle-BoLA-N:00902 | 21  | 29  | 9  | HRVIYVTSF      | smm | 0.8 | 667.18 |
| ben326_0718 | cattle-BoLA-N:00902 | 11  | 23  | 13 | IKFSFSKDGONLYF | smm | 0.3 | 296.47 |

|             |                     |     |     |    |                |     |     |        |
|-------------|---------------------|-----|-----|----|----------------|-----|-----|--------|
| ben326_0718 | cattle-BoLA-N:00902 | 40  | 52  | 13 | FKYSYKSENYDIF  | smm | 0.3 | 203.73 |
| ben326_0718 | cattle-BoLA-N:00902 | 76  | 89  | 14 | ALMLLIQLLRIFGY | smm | 1   | 855.91 |
| ben326_0718 | cattle-BoLA-N:00902 | 116 | 126 | 11 | VQMLQKKKITY    | smm | 0.5 | 398.52 |

---

**Supplementary Table 23. SNPs occurred in CDS in Ben468 relative to Ben326**

| Ben326 Gene | Gene Start | Gene End | SNP location | SNPcoord in Ben326 | Ben326 base | Ben468 base | Ben326 codon | Ben468 codon | SNP Type       | Annotation                                                |
|-------------|------------|----------|--------------|--------------------|-------------|-------------|--------------|--------------|----------------|-----------------------------------------------------------|
| ben326_0011 | 15233      | 13617    | 544          | 14690              | G           | A           | CCT->P       | TCT->S       | non-synonymous | ABC transporter, ATP-binding protein                      |
| ben326_0017 | 22997      | 22464    | 172          | 22826              | A           | G           | TAT->Y       | CAT->H       | non-synonymous | IS1296MP transposase protein B                            |
| ben326_0060 | 67776      | 66916    | 761          | 67016              | C           | T           | TGT->C       | TAT->Y       | non-synonymous | IS1296IE transposase protein B                            |
| ben326_0060 | 67776      | 66916    | 686          | 67091              | T           | C           | GAT->D       | GGT->G       | non-synonymous | IS1296IE transposase protein B                            |
| ben326_0112 | 121735     | 122883   | 182          | 121916             | A           | G           | AAT->N       | AGT->S       | non-synonymous | glycosyltransferase                                       |
| ben326_0112 | 121735     | 122883   | 183          | 121917             | T           | A           | AAT->N       | AAA->K       | non-synonymous | glycosyltransferase                                       |
| ben326_0117 | 126668     | 128206   | 1420         | 128087             | G           | A           | GAA->E       | AAA->K       | non-synonymous | ABC transporter ATP-binding protein                       |
| ben326_0140 | 151681     | 151517   | 30           | 151652             | A           | T           | GTT->V       | GTA->V       | synonymous     | IS1296 transposase protein A                              |
| ben326_0140 | 151681     | 151517   | 28           | 151654             | C           | A           | GTT->V       | TTT->F       | non-synonymous | IS1296 transposase protein A                              |
| ben326_0140 | 151681     | 151517   | 27           | 151655             | T           | C           | AAA->K       | AAG->K       | synonymous     | IS1296 transposase protein A                              |
| ben326_0140 | 151681     | 151517   | 20           | 151662             | G           | T           | GCA->A       | GAA->E       | non-synonymous | IS1296 transposase protein A                              |
| ben326_0149 | 159201     | 161099   | 301          | 159501             | G           | A           | GAT->D       | AAT->N       | non-synonymous | hypothetical protein                                      |
| ben326_0149 | 159201     | 161099   | 503          | 159703             | A           | G           | AAC->N       | AGC->S       | non-synonymous | hypothetical protein                                      |
| ben326_0173 | 185724     | 187475   | 1487         | 187210             | A           | T           | AAT->N       | ATT->I       | non-synonymous | IS1634AW transposase                                      |
| ben326_0178 | 190086     | 191759   | 1070         | 191155             | G           | T           | CGA->R       | CTA->L       | non-synonymous | IS1634AW transposase                                      |
| ben326_0178 | 190086     | 191759   | 1089         | 191174             | C           | T           | AAC->N       | AAT->N       | synonymous     | IS1634AW transposase                                      |
| ben326_0178 | 190086     | 191759   | 1090         | 191175             | G           | A           | GAT->D       | AAT->N       | non-synonymous | IS1634AW transposase                                      |
| ben326_0178 | 190086     | 191759   | 1439         | 191524             | C           | T           | TCA->S       | TTA->L       | non-synonymous | IS1634AW transposase                                      |
| ben326_0178 | 190086     | 191759   | 1471         | 191556             | C           | T           | CTA->L       | TTA->L       | synonymous     | IS1634AW transposase                                      |
| ben326_0178 | 190086     | 191759   | 1622         | 191707             | G           | A           | TGG->W       | TAG->*       | non-synonymous | IS1634AW transposase                                      |
| ben326_0178 | 190086     | 191759   | 1647         | 191732             | G           | A           | GAG->E       | GAA->E       | synonymous     | IS1634AW transposase                                      |
| ben326_0181 | 193202     | 194062   | 31           | 193232             | C           | T           | CCT->P       | TCT->S       | non-synonymous | IS1296MP transposase protein B                            |
| ben326_0191 | 206503     | 209646   | 298          | 206800             | G           | T           | GAT->D       | TAT->Y       | non-synonymous | oligopeptide ABC transporter, substrate-binding component |
| ben326_0225 | 234929     | 234069   | 778          | 234152             | C           | T           | GAC->D       | AAC->N       | non-synonymous | IS1296JI transposase protein B                            |
| ben326_0250 | 253723     | 255135   | 381          | 254103             | T           | C           | TTT->F       | TTC->F       | synonymous     | transposase ISMmy1B                                       |
| ben326_0250 | 253723     | 255135   | 1226         | 254948             | T           | C           | TTA->L       | TCA->S       | non-synonymous | transposase ISMmy1B                                       |
| ben326_0250 | 253723     | 255135   | 1335         | 255057             | G           | A           | AAG->K       | AAA->K       | synonymous     | transposase ISMmy1B                                       |



|             |        |        |      |        |   |   |        |        |                |                                         |
|-------------|--------|--------|------|--------|---|---|--------|--------|----------------|-----------------------------------------|
| ben326_0250 | 253723 | 255135 | 1336 | 255058 | T | G | TCT->S | GCT->A | non-synonymous | transposase ISMmy1B                     |
| ben326_0251 | 255926 | 255156 | 236  | 255691 | C | T | AGG->R | AAG->K | non-synonymous | IS1296MP transposase protein B          |
| ben326_0260 | 263150 | 264814 | 249  | 263398 | A | G | GAA->E | GAG->E | synonymous     | immunodominant protein P72              |
| ben326_0264 | 267926 | 269599 | 1144 | 269069 | G | A | GTT->V | ATT->I | non-synonymous | IS1634AW transposase                    |
| ben326_0264 | 267926 | 269599 | 1622 | 269547 | G | A | TGG->W | TAG->* | non-synonymous | IS1634AW transposase                    |
| ben326_0264 | 267926 | 269599 | 1647 | 269572 | G | A | GAG->E | GAA->E | synonymous     | IS1634AW transposase                    |
| ben326_0270 | 273261 | 274934 | 284  | 273544 | T | A | TTA->L | TAA->* | non-synonymous | IS1634AW transposase                    |
| ben326_0270 | 273261 | 274934 | 287  | 273547 | A | G | GAA->E | GGA->G | non-synonymous | IS1634AW transposase                    |
| ben326_0270 | 273261 | 274934 | 290  | 273550 | G | T | AGG->R | ATG->M | non-synonymous | IS1634AW transposase                    |
| ben326_0270 | 273261 | 274934 | 292  | 273552 | T | C | TTT->F | CTT->L | non-synonymous | IS1634AW transposase                    |
| ben326_0270 | 273261 | 274934 | 1144 | 274404 | G | A | GTT->V | ATT->I | non-synonymous | IS1634AW transposase                    |
| ben326_0270 | 273261 | 274934 | 1668 | 274928 | T | C | GTT->V | GTC->V | synonymous     | IS1634AW transposase                    |
| ben326_0339 | 351845 | 353518 | 1144 | 352988 | G | A | GTT->V | ATT->I | non-synonymous | IS1634AW transposase                    |
| ben326_0345 | 360037 | 359138 | 871  | 359167 | C | T | GAA->E | AAA->K | non-synonymous | ABC transporter permease                |
| ben326_0374 | 381800 | 382525 | 228  | 382027 | G | A | AAG->K | AAA->K | synonymous     | IS1296JI transposase protein B          |
| ben326_0374 | 381800 | 382525 | 229  | 382028 | A | G | ATT->I | GTT->V | non-synonymous | IS1296JI transposase protein B          |
| ben326_0391 | 399026 | 397956 | 828  | 398199 | C | T | TTG->L | TTA->L | synonymous     | hypothetical protein                    |
| ben326_0394 | 401739 | 400219 | 1472 | 400268 | G | A | TCT->S | TTT->F | non-synonymous | IS1634AC transposase                    |
| ben326_0394 | 401739 | 400219 | 1205 | 400535 | C | T | GGT->G | GAT->D | non-synonymous | IS1634AC transposase                    |
| ben326_0398 | 404594 | 403734 | 237  | 404358 | C | T | AGG->R | AGA->R | synonymous     | IS1296MP transposase protein B          |
| ben326_0401 | 406761 | 405241 | 1144 | 405618 | C | T | GTT->V | ATT->I | non-synonymous | IS1634AC transposase                    |
| ben326_0437 | 436799 | 438724 | 1113 | 437911 | G | A | GAG->E | GAA->E | synonymous     | Na+ ABC transporter ATP-binding protein |
| ben326_0543 | 547634 | 547236 | 278  | 547357 | G | A | ACT->T | ATT->I | non-synonymous | histidine triad protein                 |
| ben326_0569 | 577876 | 576356 | 1472 | 576405 | G | A | TCT->S | TTT->F | non-synonymous | IS1634AC transposase                    |
| ben326_0569 | 577876 | 576356 | 1192 | 576685 | G | A | CCT->P | TCT->S | non-synonymous | IS1634AC transposase                    |
| ben326_0654 | 662222 | 663895 | 94   | 662315 | C | T | CCA->P | TCA->S | non-synonymous | IS1634AW transposase                    |
| ben326_0654 | 662222 | 663895 | 835  | 663056 | A | G | AAA->K | GAA->E | non-synonymous | IS1634AW transposase                    |
| ben326_0654 | 662222 | 663895 | 838  | 663059 | G | A | GGA->G | AGA->R | non-synonymous | IS1634AW transposase                    |
| ben326_0654 | 662222 | 663895 | 927  | 663148 | A | T | CAA->Q | CAT->H | non-synonymous | IS1634AW transposase                    |
| ben326_0654 | 662222 | 663895 | 955  | 663176 | G | A | GAT->D | AAT->N | non-synonymous | IS1634AW transposase                    |

|             |         |         |      |         |   |   |        |        |                |                                  |
|-------------|---------|---------|------|---------|---|---|--------|--------|----------------|----------------------------------|
| ben326_0654 | 662222  | 663895  | 969  | 663190  | T | A | GAT->D | GAA->E | non-synonymous | IS1634AW transposase             |
| ben326_0654 | 662222  | 663895  | 972  | 663193  | T | G | GGT->G | GGG->G | synonymous     | IS1634AW transposase             |
| ben326_0654 | 662222  | 663895  | 975  | 663196  | T | G | GGT->G | GGG->G | synonymous     | IS1634AW transposase             |
| ben326_0654 | 662222  | 663895  | 1001 | 663222  | C | T | GCA->A | GTA->V | non-synonymous | IS1634AW transposase             |
| ben326_0654 | 662222  | 663895  | 1022 | 663243  | G | A | AGA->R | AAA->K | non-synonymous | IS1634AW transposase             |
| ben326_0654 | 662222  | 663895  | 1144 | 663365  | G | A | GTT->V | ATT->I | non-synonymous | IS1634AW transposase             |
| ben326_0674 | 685842  | 685399  | 137  | 685706  | A | C | ATT->I | AGT->S | non-synonymous | hypothetical protein             |
| ben326_0674 | 685842  | 685399  | 136  | 685707  | T | C | ATT->I | GTT->V | non-synonymous | hypothetical protein             |
| ben326_0674 | 685842  | 685399  | 134  | 685709  | T | A | GAA->E | GTA->V | non-synonymous | hypothetical protein             |
| ben326_0674 | 685842  | 685399  | 132  | 685711  | A | G | TAT->Y | TAC->Y | synonymous     | hypothetical protein             |
| ben326_0674 | 685842  | 685399  | 130  | 685713  | A | T | TAT->Y | AAT->N | non-synonymous | hypothetical protein             |
| ben326_0674 | 685842  | 685399  | 129  | 685714  | A | T | GGT->G | GGA->G | synonymous     | hypothetical protein             |
| ben326_0674 | 685842  | 685399  | 126  | 685717  | T | C | TTA->L | TTG->L | synonymous     | hypothetical protein             |
| ben326_0844 | 856746  | 855334  | 766  | 855981  | C | T | GAA->E | AAA->K | non-synonymous | transposase ISMmy1F              |
| ben326_0844 | 856746  | 855334  | 544  | 856203  | T | C | ACA->T | GCA->A | non-synonymous | transposase ISMmy1F              |
| ben326_0844 | 856746  | 855334  | 38   | 856709  | G | A | CCA->P | CTA->L | non-synonymous | transposase ISMmy1F              |
| ben326_0848 | 862137  | 862928  | 785  | 862921  | T | A | ATT->I | AAT->N | non-synonymous | IS1296AB_B transposase protein B |
| ben326_0856 | 871344  | 869932  | 5    | 871340  | G | A | GCC->A | GTC->V | non-synonymous | transposase ISMmy1F              |
| ben326_0861 | 877706  | 877221  | 469  | 877238  | T | C | AGA->R | GGA->G | non-synonymous | variable surface protein         |
| ben326_0946 | 967206  | 965020  | 1878 | 965329  | G | A | CAC->H | CAT->H | synonymous     | prolipoprotein                   |
| ben326_0953 | 973503  | 973165  | 62   | 973442  | T | G | CAG->Q | CCG->P | non-synonymous | IS1296 transposase protein B     |
| ben326_0954 | 974055  | 973825  | 218  | 973838  | C | G | GGT->G | GCT->A | non-synonymous | hypothetical protein             |
| ben326_0970 | 989681  | 988665  | 518  | 989164  | A | T | ATC->I | AAC->N | non-synonymous | IS1634AG transposase             |
| ben326_0992 | 1006913 | 1006764 | 124  | 1006790 | C | T | GGG->G | AGG->R | non-synonymous | hypothetical protein             |
| ben326_0992 | 1006913 | 1006764 | 94   | 1006820 | G | A | CCA->P | TCA->S | non-synonymous | hypothetical protein             |
| ben326_1005 | 1021226 | 1022695 | 416  | 1021641 | C | T | TCA->S | TTA->L | non-synonymous | hypothetical protein             |
| ben326_1051 | 1076536 | 1078209 | 28   | 1076563 | G | A | GGA->G | AGA->R | non-synonymous | IS1634AW transposase             |
| ben326_1051 | 1076536 | 1078209 | 1471 | 1078006 | T | C | TTA->L | CTA->L | synonymous     | IS1634AW transposase             |
| ben326_1070 | 1094973 | 1096385 | 31   | 1095003 | C | T | CCA->P | TCA->S | non-synonymous | transposase ISMmy1F              |
| ben326_1070 | 1094973 | 1096385 | 1267 | 1096239 | A | G | AGC->S | GGC->G | non-synonymous | transposase ISMmy1F              |

|             |         |         |      |         |   |   |        |        |                |                         |
|-------------|---------|---------|------|---------|---|---|--------|--------|----------------|-------------------------|
| ben326_1071 | 1096643 | 1098316 | 1471 | 1098113 | T | C | TTA->L | CTA->L | synonymous     | IS1634AW transposase    |
| ben326_1072 | 1099248 | 1099490 | 133  | 1099380 | G | A | GAT->D | AAT->N | non-synonymous | variable prolipoprotein |

---

**Supplementary Table 24. Indels occurred in CDS in Ben468 relative to Ben326**

| Indelcoord in Ben326 | Indel | Indel Base | Indelcoord in Ben468 | Ben326 Gene | Gene Start | Gene End | Indel location in Gene | Annotation                     |
|----------------------|-------|------------|----------------------|-------------|------------|----------|------------------------|--------------------------------|
| 4574                 | -     | g          | 4574                 | ben326_0005 | 4156       | 4590     | 419                    | hypothetical protein           |
| 4574                 | -     | g          | 4574                 | ben326_0006 | 4556       | 5248     | 19                     | purine NTPase                  |
| 22468                | -     | a          | 22479                | ben326_0017 | 22997      | 22464    | 530                    | IS1296MP transposase protein B |
| 22478                | -     | ta         | 22488                | ben326_0017 | 22997      | 22464    | 520                    | IS1296MP transposase protein B |
| 22489                | -     | t          | 22497                | ben326_0017 | 22997      | 22464    | 509                    | IS1296MP transposase protein B |
| 22509                | -     | t          | 22516                | ben326_0017 | 22997      | 22464    | 489                    | IS1296MP transposase protein B |
| 22531                | -     | a          | 22537                | ben326_0017 | 22997      | 22464    | 467                    | IS1296MP transposase protein B |
| 22538                | -     | t          | 22543                | ben326_0017 | 22997      | 22464    | 460                    | IS1296MP transposase protein B |
| 23404                | -     | t          | 23402                | ben326_0019 | 23522      | 23391    | 119                    | hypothetical protein           |
| 23508                | -     | t          | 23505                | ben326_0019 | 23522      | 23391    | 15                     | hypothetical protein           |
| 61663                | -     | t          | 61664                | ben326_0054 | 61681      | 61271    | 19                     | hypothetical protein           |
| 68091                | -     | t          | 68092                | ben326_0061 | 68105      | 67785    | 15                     | IS1296 transposase protein A   |
| 68103                | -     | c          | 68103                | ben326_0061 | 68105      | 67785    | 3                      | IS1296 transposase protein A   |
| 78256                | -     | t          | 81132                | ben326_0075 | 79702      | 78182    | 1447                   | IS1634AC transposase           |
| 78506                | -     | t          | 81381                | ben326_0075 | 79702      | 78182    | 1197                   | IS1634AC transposase           |
| 87343                | -     | a          | 86565                | ben326_0078 | 86647      | 87354    | 697                    | hypothetical protein           |
| 100668               | -     | t          | 99943                | ben326_0091 | 101269     | 100658   | 602                    | hypothetical protein           |
| 101248               | -     | c          | 100522               | ben326_0091 | 101269     | 100658   | 22                     | hypothetical protein           |
| 123045               | +     | t          | 124602               | ben326_0113 | 123850     | 122936   | 806                    | glycosyltransferase            |
| 125481               | -     | a          | 1035053              | ben326_0115 | 125774     | 125334   | 294                    | hypothetical protein           |
| 125488               | -     | a          | 127047               | ben326_0115 | 125774     | 125334   | 287                    | hypothetical protein           |
| 125552               | -     | t          | 1035123              | ben326_0115 | 125774     | 125334   | 223                    | hypothetical protein           |
| 125556               | -     | t          | 127114               | ben326_0115 | 125774     | 125334   | 219                    | hypothetical protein           |
| 136504               | -     | t          | 143983               | ben326_0124 | 136436     | 137224   | 69                     | hypothetical protein           |
| 137732               | +     | ttcc       | 139288               | ben326_0125 | 139105     | 137432   | 1374                   | IS1634AW transposase           |
| 138842               | -     | c          | 140401               | ben326_0125 | 139105     | 137432   | 264                    | IS1634AW transposase           |
| 139397               | +     | t          | 145858               | ben326_0126 | 139323     | 139502   | 75                     | IS1296UK transposase           |
| 139659               | -     | a          | 146120               | ben326_0127 | 139641     | 140372   | 19                     | IS1296UK transposase protein B |
| 147805               | +     | c          | 154263               | ben326_0133 | 146445     | 148043   | 1361                   | CTP synthetase                 |
| 150239               | +     | c          | 156697               | ben326_0136 | 150316     | 150200   | 78                     | hypothetical protein           |
| 150268               | -     | t          | 156727               | ben326_0136 | 150316     | 150200   | 49                     | hypothetical protein           |
| 150701               | +     | a          | 157157               | ben326_0138 | 151124     | 150633   | 424                    | IS1296DS transposase protein B |
| 150892               | +     | a          | 157349               | ben326_0138 | 151124     | 150633   | 233                    | IS1296DS transposase protein B |
| 150898               | +     | t          | 157356               | ben326_0138 | 151124     | 150633   | 227                    | IS1296DS transposase protein B |
| 150938               | +     | t          | 157397               | ben326_0138 | 151124     | 150633   | 187                    | IS1296DS transposase protein B |
| 151399               | +     | t          | 157859               | ben326_0139 | 151453     | 151133   | 55                     | IS1296 transposase protein A   |
| 151439               | -     | t          | 157900               | ben326_0139 | 151453     | 151133   | 15                     | IS1296 transposase protein A   |
| 151528               | -     | t          | 157984               | ben326_0140 | 151681     | 151517   | 154                    | IS1296 transposase protein A   |
| 151648               | +     | t          | 158103               | ben326_0140 | 151681     | 151517   | 34                     | IS1296 transposase protein A   |
| 151662               | -     | g          | 158118               | ben326_0140 | 151681     | 151517   | 20                     | IS1296 transposase protein A   |
| 152881               | -     | tg         | 159336               | ben326_0142 | 154567     | 152867   | 1687                   | IS1634AW transposase           |
| 183887               | -     | t          | 190595               | ben326_0172 | 184998     | 183850   | 1112                   | Mg2+ transporter               |
| 186920               | -     | a          | 193627               | ben326_0173 | 185724     | 187475   | 1197                   | IS1634AW transposase           |
| 192910               | -     | t          | 198717               | ben326_0180 | 192909     | 193193   | 2                      | IS1296 transposase protein A   |
| 211122               | -     | a          | 216927               | ben326_0193 | 210558     | 211169   | 565                    | DNA methylase                  |
| 215165               | +     | a          | 220969               | ben326_0199 | 214807     | 215175   | 359                    | hypothetical protein           |
| 215423               | -     | a          | 221228               | ben326_0200 | 215410     | 215847   | 14                     | hypothetical protein           |
| 215838               | -     | a          | 221641               | ben326_0200 | 215410     | 215847   | 429                    | hypothetical protein           |
| 224278               | -     | a          | 230081               | ben326_0208 | 225120     | 224254   | 843                    | hypothetical protein           |
| 235244               | -     | t          | 241045               | ben326_0226 | 235258     | 234938   | 15                     | IS1296 transposase protein A   |
| 235256               | -     | c          | 241056               | ben326_0226 | 235258     | 234938   | 3                      | IS1296 transposase protein A   |
| 235335               | -     | t          | 241130               | ben326_0227 | 235486     | 235322   | 152                    | hypothetical protein           |
| 255036               | +     | a          | 260830               | ben326_0250 | 253723     | 255135   | 1314                   | transposase ISMmylB            |
| 255054               | +     | a          | 260849               | ben326_0250 | 253723     | 255135   | 1332                   | transposase ISMmylB            |

|        |   |      |        |             |        |        |      |                                  |
|--------|---|------|--------|-------------|--------|--------|------|----------------------------------|
| 255059 | + | a    | 260855 | ben326_0250 | 253723 | 255135 | 1337 | transposase ISMmy1B              |
| 255179 | - | t    | 260976 | ben326_0251 | 255926 | 255156 | 748  | IS1296MP transposase protein B   |
| 256241 | - | t    | 262037 | ben326_0252 | 256255 | 255935 | 15   | IS1296 transposase protein A     |
| 259665 | - | c    | 265895 | ben326_0255 | 259081 | 259710 | 585  | hypothetical protein             |
| 261654 | - | t    | 267883 | ben326_0257 | 261653 | 261817 | 2    | hypothetical protein             |
| 261806 | - | g    | 268034 | ben326_0257 | 261653 | 261817 | 154  | hypothetical protein             |
| 261891 | - | t    | 268117 | ben326_0258 | 261890 | 262174 | 2    | IS1296 transposase protein A     |
| 266318 | - | at   | 272542 | ben326_0262 | 266050 | 267180 | 269  | hypothetical protein             |
| 267166 | - | t    | 273414 | ben326_0262 | 266050 | 267180 | 1117 | hypothetical protein             |
| 269048 | + | a    | 275294 | ben326_0264 | 267926 | 269599 | 1123 | IS1634AW transposase             |
| 269069 | + | a    | 275316 | ben326_0264 | 267926 | 269599 | 1144 | IS1634AW transposase             |
| 269122 | - | a    | 275370 | ben326_0264 | 267926 | 269599 | 1197 | IS1634AW transposase             |
| 269653 | - | t    | 275900 | ben326_0265 | 269650 | 270543 | 4    | IS1296MP transposase protein B   |
| 269755 | - | t    | 276534 | ben326_0265 | 269650 | 270543 | 106  | IS1296MP transposase protein B   |
| 269918 | + | a    | 276696 | ben326_0265 | 269650 | 270543 | 269  | IS1296MP transposase protein B   |
| 273537 | + | a    | 280315 | ben326_0270 | 273261 | 274934 | 277  | IS1634AW transposase             |
| 273545 | + | ta   | 280324 | ben326_0270 | 273261 | 274934 | 285  | IS1634AW transposase             |
| 273716 | - | a    | 280497 | ben326_0270 | 273261 | 274934 | 456  | IS1634AW transposase             |
| 274387 | + | a    | 281167 | ben326_0270 | 273261 | 274934 | 1127 | IS1634AW transposase             |
| 274405 | + | a    | 281186 | ben326_0270 | 273261 | 274934 | 1145 | IS1634AW transposase             |
| 274459 | - | a    | 281241 | ben326_0270 | 273261 | 274934 | 1199 | IS1634AW transposase             |
| 278830 | + | a    | 285611 | ben326_0274 | 277480 | 278847 | 1351 | phosphopyruvate hydratase        |
| 311947 | + | aaat | 318729 | ben326_0301 | 310042 | 311952 | 1906 | hypothetical protein             |
| 312809 | - | t    | 319597 | ben326_0302 | 312069 | 312845 | 741  | hypothetical protein             |
| 314329 | - | t    | 321115 | ben326_0304 | 313767 | 314342 | 563  | prolipoprotein                   |
| 350149 | - | t    | 357850 | ben326_0335 | 347925 | 350207 | 2225 | hypothetical protein             |
| 352967 | + | a    | 360667 | ben326_0339 | 351845 | 353518 | 1123 | IS1634AW transposase             |
| 352988 | + | a    | 360689 | ben326_0339 | 351845 | 353518 | 1144 | IS1634AW transposase             |
| 353041 | - | t    | 901493 | ben326_0339 | 351845 | 353518 | 1197 | IS1634AW transposase             |
| 354901 | - | t    | 362602 | ben326_0341 | 355623 | 354886 | 723  | hypothetical protein             |
| 359160 | + | t    | 366860 | ben326_0345 | 360037 | 359138 | 878  | ABC transporter permease         |
| 367630 | + | a    | 375329 | ben326_0355 | 367327 | 367671 | 304  | hypothetical protein             |
| 374778 | - | t    | 382478 | ben326_0364 | 374075 | 374809 | 704  | IS1296MP transposase protein B   |
| 374791 | - | a    | 382490 | ben326_0364 | 374075 | 374809 | 717  | IS1296MP transposase protein B   |
| 376079 | + | a    | 384394 | ben326_0365 | 374953 | 376626 | 1127 | IS1634AW transposase             |
| 376097 | + | a    | 384413 | ben326_0365 | 374953 | 376626 | 1145 | IS1634AW transposase             |
| 376141 | + | t    | 384458 | ben326_0365 | 374953 | 376626 | 1189 | IS1634AW transposase             |
| 376152 | + | a    | 384470 | ben326_0365 | 374953 | 376626 | 1200 | IS1634AW transposase             |
| 379097 | - | a    | 387411 | ben326_0369 | 379836 | 379087 | 740  | hypothetical protein             |
| 381271 | - | a    | 389589 | ben326_0372 | 381246 | 381434 | 26   | IS1296DS transposase protein A   |
| 381423 | - | g    | 389740 | ben326_0372 | 381246 | 381434 | 178  | IS1296DS transposase protein A   |
| 381508 | - | t    | 389823 | ben326_0373 | 381507 | 381791 | 2    | IS1296 transposase protein A     |
| 381555 | + | a    | 389869 | ben326_0373 | 381507 | 381791 | 49   | IS1296 transposase protein A     |
| 381987 | + | a    | 390302 | ben326_0374 | 381800 | 382525 | 188  | IS1296JI transposase protein B   |
| 382027 | + | a    | 390343 | ben326_0374 | 381800 | 382525 | 228  | IS1296JI transposase protein B   |
| 382033 | + | t    | 390350 | ben326_0374 | 381800 | 382525 | 234  | IS1296JI transposase protein B   |
| 382521 | - | t    | 390839 | ben326_0374 | 381800 | 382525 | 722  | IS1296JI transposase protein B   |
| 390810 | - | g    | 399128 | ben326_0382 | 390820 | 388166 | 11   | DNA polymerase III subunit alpha |
| 390810 | - | g    | 399128 | ben326_0383 | 392453 | 390783 | 1644 | DNA polymerase III subunit alpha |
| 392446 | - | g    | 400763 | ben326_0383 | 392453 | 390783 | 8    | DNA polymerase III subunit alpha |
| 393130 | - | a    | 401446 | ben326_0386 | 393630 | 393118 | 501  | phosphatidate cytidyltransferase |
| 393233 | - | a    | 401548 | ben326_0386 | 393630 | 393118 | 398  | phosphatidate cytidyltransferase |
| 393607 | - | g    | 401921 | ben326_0386 | 393630 | 393118 | 24   | phosphatidate cytidyltransferase |
| 400293 | - | t    | 408606 | ben326_0394 | 401739 | 400219 | 1447 | IS1634AC transposase             |
| 404709 | + | a    | 413022 | ben326_0399 | 404782 | 404603 | 74   | IS1296UK transposase             |
| 405315 | - | t    | 414574 | ben326_0401 | 406761 | 405241 | 1447 | IS1634AC transposase             |
| 405565 | - | t    | 414823 | ben326_0401 | 406761 | 405241 | 1197 | IS1634AC transposase             |
| 405619 | + | t    | 414876 | ben326_0401 | 406761 | 405241 | 1143 | IS1634AC transposase             |

|        |   |    |        |             |        |        |      |                                                        |
|--------|---|----|--------|-------------|--------|--------|------|--------------------------------------------------------|
| 405640 | + | t  | 414898 | ben326_0401 | 406761 | 405241 | 1122 | IS1634AC transposase                                   |
| 413515 | - | a  | 422775 | ben326_0411 | 414196 | 413510 | 682  | tRNA (uracil-5-)-methyltransferase Gid                 |
| 417620 | - | t  | 426877 | ben326_0416 | 419066 | 417546 | 1447 | IS1634AC transposase                                   |
| 417979 | + | t  | 427235 | ben326_0416 | 419066 | 417546 | 1088 | IS1634AC transposase                                   |
| 421410 | - | a  | 430666 | ben326_0418 | 420259 | 421455 | 1152 | hypothetical protein                                   |
| 430041 | - | a  | 439294 | ben326_0430 | 430899 | 430039 | 859  | putative transposase InsK for insertion sequence IS150 |
| 430702 | + | t  | 439954 | ben326_0430 | 430899 | 430039 | 198  | putative transposase InsK for insertion sequence IS150 |
| 431214 | - | t  | 440467 | ben326_0431 | 431228 | 430908 | 15   | IS1296 transposase protein A                           |
| 438989 | - | t  | 448344 | ben326_0439 | 438948 | 439472 | 42   | hypothetical protein                                   |
| 448121 | - | g  | 457476 | ben326_0446 | 447552 | 448169 | 570  | hypothetical protein                                   |
| 452657 | - | t  | 462012 | ben326_0454 | 454103 | 452583 | 1447 | IS1634AC transposase                                   |
| 454808 | - | t  | 466796 | ben326_0456 | 454506 | 455459 | 303  | putative transposase InsK for insertion sequence IS150 |
| 455343 | - | a  | 467330 | ben326_0456 | 454506 | 455459 | 838  | putative transposase InsK for insertion sequence IS150 |
| 455349 | - | a  | 467335 | ben326_0456 | 454506 | 455459 | 844  | putative transposase InsK for insertion sequence IS150 |
| 455377 | + | t  | 467362 | ben326_0456 | 454506 | 455459 | 872  | putative transposase InsK for insertion sequence IS150 |
| 456054 | - | t  | 468040 | ben326_0457 | 455881 | 456066 | 174  | DivIVA domain protein                                  |
| 459189 | + | a  | 471174 | ben326_0459 | 457987 | 459216 | 1203 | prolipoprotein                                         |
| 480548 | + | t  | 492537 | ben326_0482 | 479819 | 480556 | 730  | NH(3)-dependent NAD(+) synthetase                      |
| 484737 | - | a  | 496726 | ben326_0487 | 484415 | 484756 | 323  | hypothetical protein                                   |
| 486147 | - | t  | 498135 | ben326_0488 | 485331 | 486149 | 817  | tRNA-specific 2-thiouridylase MnmA                     |
| 505732 | - | t  | 517718 | ben326_0503 | 505139 | 505756 | 594  | ABC transporter ATP-binding protein/permease           |
| 520191 | - | a  | 532808 | ben326_0516 | 517823 | 521977 | 2369 | putative membrane protein                              |
| 537335 | - | a  | 549951 | ben326_0530 | 537291 | 538103 | 45   | phosphate ABC transporter, ATP-binding protein         |
| 539070 | + | a  | 551685 | ben326_0532 | 538853 | 539119 | 218  | hypothetical protein                                   |
| 568936 | - | t  | 581552 | ben326_0557 | 566863 | 568983 | 2074 | helicase, RecD/TraA family                             |
| 571437 | - | t  | 584052 | ben326_0561 | 570980 | 571441 | 458  | glycerol ABC transporter ATP-binding protein           |
| 571445 | - | a  | 584059 | ben326_0562 | 571719 | 571438 | 275  | hypothetical protein                                   |
| 571458 | - | t  | 584071 | ben326_0562 | 571719 | 571438 | 262  | hypothetical protein                                   |
| 576430 | - | t  | 589041 | ben326_0569 | 577876 | 576356 | 1447 | IS1634AC transposase                                   |
| 582125 | + | t  | 594734 | ben326_0574 | 582843 | 582112 | 719  | IS1296MP transposase protein B                         |
| 582501 | + | t  | 595111 | ben326_0574 | 582843 | 582112 | 343  | IS1296MP transposase protein B                         |
| 582646 | + | t  | 595257 | ben326_0574 | 582843 | 582112 | 198  | IS1296MP transposase protein B                         |
| 582822 | + | c  | 595434 | ben326_0574 | 582843 | 582112 | 22   | IS1296MP transposase protein B                         |
| 583089 | + | ct | 595702 | ben326_0575 | 583172 | 582852 | 84   | IS1296 transposase protein A                           |
| 583135 | + | a  | 595750 | ben326_0575 | 583172 | 582852 | 38   | IS1296 transposase protein A                           |
| 583158 | - | t  | 595774 | ben326_0575 | 583172 | 582852 | 15   | IS1296 transposase protein A                           |
| 583247 | - | t  | 595858 | ben326_0576 | 583400 | 583236 | 154  | hypothetical protein                                   |
| 583374 | + | c  | 595984 | ben326_0576 | 583400 | 583236 | 27   | hypothetical protein                                   |
| 590935 | - | a  | 603546 | ben326_0584 | 590936 | 589887 | 2    | N-acetylglucosamine-6-phosphate deacetylase            |
| 594175 | - | t  | 606785 | ben326_0588 | 594200 | 592557 | 26   | hypothetical protein                                   |
| 601466 | + | t  | 614076 | ben326_0597 | 601146 | 601490 | 321  | hypothetical protein                                   |
| 605877 | - | t  | 618488 | ben326_0601 | 604556 | 605887 | 1322 | hypothetical protein                                   |
| 606220 | - | a  | 618831 | ben326_0602 | 606210 | 607301 | 11   | hypothetical protein                                   |
| 617903 | + | t  | 632468 | ben326_0616 | 618621 | 617890 | 719  | IS1296MP transposase protein B                         |
| 620107 | + | a  | 634908 | ben326_0618 | 619027 | 620700 | 1081 | IS1634AW transposase                                   |
| 631591 | - | a  | 646394 | ben326_0630 | 631606 | 631235 | 16   | membrane protein                                       |
| 643361 | + | t  | 658162 | ben326_0642 | 643947 | 643330 | 587  | S-adenosyl-methyltransferase MrwW                      |
| 647861 | - | t  | 662663 | ben326_0648 | 648622 | 647810 | 762  | phenylalanine--tRNA ligase, alpha subunit              |
| 648749 | + | t  | 663550 | ben326_0649 | 649273 | 648746 | 525  | hypothetical protein                                   |
| 663137 | + | g  | 677940 | ben326_0654 | 662222 | 663895 | 916  | IS1634AW transposase                                   |
| 671937 | - | t  | 686741 | ben326_0664 | 672038 | 671907 | 102  | hypothetical protein                                   |
| 737918 | + | a  | 701698 | ben326_0721 | 736838 | 738511 | 1081 | IS1634AW transposase                                   |
| 738577 | + | t  | 702357 | ben326_0722 | 739335 | 738553 | 759  | hypothetical protein                                   |
| 745192 | - | t  | 708973 | ben326_0728 | 746638 | 745118 | 1447 | IS1634AC transposase                                   |
| 745561 | + | a  | 465813 | ben326_0728 | 746638 | 745118 | 1078 | IS1634AC transposase                                   |
| 747827 | - | t  | 711608 | ben326_0730 | 747841 | 747521 | 15   | IS1296 transposase protein A                           |
| 747839 | - | c  | 711619 | ben326_0730 | 747841 | 747521 | 3    | IS1296 transposase protein A                           |
| 755782 | - | c  | 719553 | ben326_0738 | 756640 | 755735 | 859  | chromosome replication initiation/membrane attachment  |

|         |   |    |        |             |         |         |      | protein                                                |
|---------|---|----|--------|-------------|---------|---------|------|--------------------------------------------------------|
| 760710  | - | t  | 724480 | ben326_0742 | 763340  | 760674  | 2631 | DNA polymerase III subunit alpha                       |
| 774821  | + | tc | 620665 | ben326_0755 | 773759  | 775432  | 1063 | IS1634AW transposase                                   |
| 774835  | + | t  | 620650 | ben326_0755 | 773759  | 775432  | 1077 | IS1634AW transposase                                   |
| 774846  | - | a  | 738616 | ben326_0755 | 773759  | 775432  | 1088 | IS1634AW transposase                                   |
| 774958  | + | t  | 620526 | ben326_0755 | 773759  | 775432  | 1200 | IS1634AW transposase                                   |
| 800282  | - | a  | 764053 | ben326_0776 | 800559  | 799333  | 278  | cobalt transporter ATP-binding subunit                 |
| 801024  | - | t  | 764797 | ben326_0778 | 802470  | 800950  | 1447 | IS1634AC transposase                                   |
| 802134  | + | a  | 765906 | ben326_0778 | 802470  | 800950  | 337  | IS1634AC transposase                                   |
| 837761  | - | c  | 801535 | ben326_0827 | 838393  | 837758  | 633  | RNA pseudouridylate synthase                           |
| 842789  | - | g  | 806562 | ben326_0832 | 843652  | 842786  | 864  | glycosyltransferase                                    |
| 850151  | - | a  | 813922 | ben326_0837 | 850164  | 848605  | 14   | prolipoprotein                                         |
| 850151  | - | a  | 813922 | ben326_0838 | 850954  | 850121  | 804  | hypothetical protein                                   |
| 856526  | - | a  | 820294 | ben326_0844 | 856746  | 855334  | 221  | transposase ISMmy1F                                    |
| 861490  | + | a  | 825257 | ben326_0847 | 860413  | 862086  | 1078 | IS1634AW transposase                                   |
| 862923  | - | t  | 827227 | ben326_0848 | 862137  | 862928  | 787  | IS1296AB_B transposase protein B                       |
| 863027  | + | at | 827328 | ben326_0849 | 864799  | 863012  | 1773 | alkylphosphonate ABC transporter permease              |
| 863034  | + | c  | 827337 | ben326_0849 | 864799  | 863012  | 1766 | alkylphosphonate ABC transporter permease              |
| 863039  | + | t  | 827343 | ben326_0849 | 864799  | 863012  | 1761 | alkylphosphonate ABC transporter permease              |
| 867670  | + | t  | 831975 | ben326_0853 | 868079  | 867651  | 410  | HAD superfamily hydrolase                              |
| 867678  | + | t  | 831984 | ben326_0853 | 868079  | 867651  | 402  | HAD superfamily hydrolase                              |
| 875537  | + | a  | 839847 | ben326_0859 | 874460  | 876133  | 1078 | IS1634AW transposase                                   |
| 877236  | - | tc | 841547 | ben326_0861 | 877706  | 877221  | 471  | variable surface protein                               |
| 909021  | - | a  | 872704 | ben326_0890 | 909036  | 908494  | 16   | beta-glucosidase                                       |
| 909233  | + | t  | 872914 | ben326_0891 | 909883  | 909224  | 651  | beta-glucosidase                                       |
| 911843  | - | t  | 875521 | ben326_0895 | 911841  | 912125  | 3    | IS1296 transposase protein A                           |
| 912883  | + | a  | 876561 | ben326_0896 | 912134  | 912994  | 750  | IS1296MP transposase protein B                         |
| 913012  | + | g  | 876691 | ben326_0897 | 914048  | 913002  | 1037 | hypothetical protein                                   |
| 914094  | - | a  | 877774 | ben326_0898 | 915381  | 914056  | 1288 | glycosyl hydrolase family protein                      |
| 921729  | - | g  | 885409 | ben326_0904 | 921553  | 921741  | 177  | IS1296DS transposase protein A                         |
| 921815  | - | t  | 885493 | ben326_0905 | 921814  | 922098  | 2    | IS1296 transposase protein A                           |
| 931672  | + | c  | 895351 | ben326_0914 | 930610  | 932283  | 1063 | IS1634AW transposase                                   |
| 931693  | + | a  | 895373 | ben326_0914 | 930610  | 932283  | 1084 | IS1634AW transposase                                   |
| 953553  | - | t  | 909675 | ben326_0932 | 954999  | 953479  | 1447 | IS1634AC transposase                                   |
| 967353  | + | a  | 923480 | ben326_0947 | 967327  | 968268  | 27   | IS1296QT transposase protein A                         |
| 967818  | - | a  | 923946 | ben326_0947 | 967327  | 968268  | 492  | IS1296QT transposase protein A                         |
| 968229  | + | t  | 924356 | ben326_0947 | 967327  | 968268  | 903  | IS1296QT transposase protein A                         |
| 968729  | - | ga | 924856 | ben326_0948 | 968428  | 968757  | 302  | putative transposase InsK for insertion sequence IS150 |
| 968729  | - | ga | 924856 | ben326_0949 | 969632  | 968718  | 904  | hypothetical protein                                   |
| 968783  | - | c  | 924908 | ben326_0949 | 969632  | 968718  | 850  | hypothetical protein                                   |
| 969772  | - | t  | 925896 | ben326_0950 | 970726  | 969764  | 955  | hypothetical protein                                   |
| 971200  | + | g  | 927322 | ben326_0951 | 971611  | 970961  | 412  | CTP synthetase                                         |
| 973183  | - | t  | 929305 | ben326_0953 | 973503  | 973165  | 321  | IS1296 transposase protein B                           |
| 973827  | + | t  | 929949 | ben326_0954 | 974055  | 973825  | 229  | hypothetical protein                                   |
| 973861  | + | t  | 929984 | ben326_0954 | 974055  | 973825  | 195  | hypothetical protein                                   |
| 973987  | + | c  | 930111 | ben326_0954 | 974055  | 973825  | 69   | hypothetical protein                                   |
| 974050  | - | t  | 930175 | ben326_0954 | 974055  | 973825  | 6    | hypothetical protein                                   |
| 988686  | - | t  | 944786 | ben326_0970 | 989681  | 988665  | 996  | IS1634AG transposase                                   |
| 992275  | - | t  | 948375 | ben326_0975 | 993721  | 992201  | 1447 | IS1634AC transposase                                   |
| 994734  | + | a  | 950908 | ben326_0976 | 993939  | 994772  | 796  | prolipoprotein                                         |
| 1005636 | + | t  | 962269 | ben326_0991 | 1006719 | 1005610 | 1084 | transposase, IS4 family                                |
| 1005712 | - | t  | 962346 | ben326_0991 | 1006719 | 1005610 | 1008 | transposase, IS4 family                                |
| 1006615 | + | t  | 963248 | ben326_0991 | 1006719 | 1005610 | 105  | transposase, IS4 family                                |
| 1006715 | - | a  | 963349 | ben326_0991 | 1006719 | 1005610 | 5    | transposase, IS4 family                                |
| 1006774 | - | t  | 963405 | ben326_0992 | 1006913 | 1006764 | 140  | hypothetical protein                                   |
| 1006793 | - | a  | 963423 | ben326_0992 | 1006913 | 1006764 | 121  | hypothetical protein                                   |
| 1022923 | + | a  | 979548 | ben326_1006 | 1023656 | 1022916 | 734  | IS1296MP transposase protein B                         |
| 1023651 | - | t  | 980277 | ben326_1006 | 1023656 | 1022916 | 6    | IS1296MP transposase protein B                         |

|         |   |    |         |             |         |         |      |                                                  |
|---------|---|----|---------|-------------|---------|---------|------|--------------------------------------------------|
| 1052540 | - | a  | 1016899 | ben326_1028 | 1051263 | 1052591 | 1278 | oligopeptide ABC transporter ATP-binding protein |
| 1052542 | - | a  | 1026540 | ben326_1028 | 1051263 | 1052591 | 1280 | oligopeptide ABC transporter ATP-binding protein |
| 1052575 | - | ta | 1026572 | ben326_1028 | 1051263 | 1052591 | 1313 | oligopeptide ABC transporter ATP-binding protein |
| 1062591 | + | g  | 1044999 | ben326_1040 | 1062137 | 1062625 | 455  | lipoprotein                                      |
| 1062604 | + | a  | 1042670 | ben326_1040 | 1062137 | 1062625 | 468  | lipoprotein                                      |
| 1062607 | + | a  | 1045016 | ben326_1040 | 1062137 | 1062625 | 471  | lipoprotein                                      |
| 1062617 | + | a  | 1042684 | ben326_1040 | 1062137 | 1062625 | 481  | lipoprotein                                      |
| 1062620 | + | a  | 1045030 | ben326_1040 | 1062137 | 1062625 | 484  | lipoprotein                                      |
| 1062624 | + | a  | 1042692 | ben326_1040 | 1062137 | 1062625 | 488  | lipoprotein                                      |
| 1063610 | + | gg | 143775  | ben326_1042 | 1063602 | 1063784 | 9    | hypothetical protein                             |
| 1064979 | - | g  | 1047387 | ben326_1043 | 1064456 | 1065022 | 524  | variable surface prolipoprotein                  |
| 1077613 | + | a  | 1060020 | ben326_1051 | 1076536 | 1078209 | 1078 | IS1634AW transposase                             |
| 1091396 | + | t  | 1073803 | ben326_1066 | 1091810 | 1091388 | 415  | hypothetical protein                             |
| 1091878 | - | t  | 1074286 | ben326_1067 | 1093074 | 1091872 | 1197 | hypothetical protein                             |
| 1097720 | + | a  | 1080126 | ben326_1071 | 1096643 | 1098316 | 1078 | IS1634AW transposase                             |
| 1100870 | - | a  | 276171  | ben326_1075 | 1101129 | 1100587 | 260  | IS1296QT transposase protein A                   |
| 1100904 | - | c  | 633513  | ben326_1075 | 1101129 | 1100587 | 226  | IS1296QT transposase protein A                   |
| 1100953 | + | t  | 161310  | ben326_1075 | 1101129 | 1100587 | 177  | IS1296QT transposase protein A                   |
| 1101016 | - | tc | 1083421 | ben326_1075 | 1101129 | 1100587 | 114  | IS1296QT transposase protein A                   |
| 1101096 | - | a  | 275946  | ben326_1075 | 1101129 | 1100587 | 34   | IS1296QT transposase protein A                   |
| 1101104 | - | t  | 68302   | ben326_1075 | 1101129 | 1100587 | 26   | IS1296QT transposase protein A                   |



**Supplementary Table 25. Genes under positive selection during evolving to Ben468**

| Sequence              | Ka          | Ks          | Ka/Ks   | P-Value(Fisher) | Length | S-Sites | N-Sites | Product                                                                  |
|-----------------------|-------------|-------------|---------|-----------------|--------|---------|---------|--------------------------------------------------------------------------|
| ben181_0009_ben1_0009 | 0.000510664 | 1.02E-05    | 50      | 0.367879        | 2535   | 432.466 | 2102.53 | amino acid or sugar ABC transport system, permease protein               |
| ben468_0010_ben1_0010 | 0.000773371 | 1.55E-05    | 50      | 0.367879        | 1614   | 250.81  | 1363.19 | ABC transporter, ATP-binding protein                                     |
| ben326_0012_ben1_0011 | 0.000755759 | 1.51E-05    | 50      | 0.31591         | 1620   | 228.852 | 1391.15 | ribose/galactose ABC transporter substrate-binding protein               |
| ben468_0011_ben1_0011 | 0.000755759 | 1.51E-05    | 50      | 0.31591         | 1620   | 228.852 | 1391.15 | ribose/galactose ABC transporter substrate-binding protein               |
| ben181_0033_ben1_0033 | 0.000200835 | 8.76E-05    | 2.29158 | 0.367879        | 5289   | 549.642 | 4739.36 | efflux ABC transporter, permease protein                                 |
| ben326_0036_ben1_0033 | 0.000200835 | 8.76E-05    | 2.29158 | 0.367879        | 5289   | 549.642 | 4739.36 | efflux ABC transporter, permease protein                                 |
| ben468_0033_ben1_0033 | 0.000200835 | 8.76E-05    | 2.29158 | 0.367879        | 5289   | 549.642 | 4739.36 | efflux ABC transporter, permease protein                                 |
| ben326_0078_ben1_0076 | 0.00475201  | 0.000102382 | 46.4144 | 0.5495          | 705    | 75.1637 | 629.836 | hypothetical protein                                                     |
| ben181_0078_ben1_0078 | 0.0026223   | 7.19E-05    | 36.4532 | 0.534232        | 1287   | 124.939 | 1162.06 | phosphonate ABC transporter, permease protein PhnE                       |
| ben181_0111_ben1_0107 | 0.00700249  | 0.000161985 | 43.2292 | 0.446613        | 1947   | 195.897 | 1751.1  | hypothetical protein                                                     |
| ben468_0119_ben1_0114 | 0.000766348 | 1.53E-05    | 50      | 0.367879        | 1527   | 181.992 | 1345.01 | ABC transporter ATP-binding protein                                      |
| ben181_0131_ben1_0127 | 0.0492302   | 0.000989812 | 49.737  | 0.716923        | 123    | 17.9572 | 105.043 | hypothetical protein                                                     |
| ben468_0136_ben1_0131 | 0.00143375  | 3.36E-05    | 42.6522 | 0.367879        | 768    | 54.2474 | 713.753 | hypothetical protein                                                     |
| ben468_0404_ben1_0132 | 0.0113883   | 0.000227766 | 50      | 0.367879        | 117    | 29.7861 | 87.2139 | hypothetical protein                                                     |
| ben326_0133_ben1_0139 | 0.00144694  | 2.89E-05    | 50      | 0.47379         | 1581   | 150.939 | 1430.06 | CTP synthetase                                                           |
| ben468_0160_ben1_0153 | 0.00121602  | 2.56E-05    | 47.4902 | 0.490247        | 1869   | 211.743 | 1657.26 | hypothetical protein                                                     |
| ben468_0201_ben1_0194 | 0.000336599 | 8.39E-06    | 40.1416 | 0.367879        | 3099   | 120.795 | 2978.21 | oligopeptide ABC transporter, substrate-binding component                |
| ben181_0209_ben1_0202 | 0.000892248 | 2.49E-05    | 35.8156 | 0.448343        | 2421   | 165.31  | 2255.69 | transfer complex protein TrsE                                            |
| ben326_0234_ben1_0234 | 0.0013845   | 2.77E-05    | 50      | 0.367879        | 888    | 121.667 | 766.333 | guanylate kinase                                                         |
| ben468_0240_ben1_0234 | 0.0013845   | 2.77E-05    | 50      | 0.367879        | 888    | 121.667 | 766.333 | guanylate kinase                                                         |
| ben181_0248_ben1_0242 | 0.00114318  | 2.30E-05    | 49.81   | 0.367879        | 954    | 69.544  | 884.456 | spermidine/putrescine ABC transporter permease/substrate-binding protein |
| ben326_0274_ben1_0278 | 0.000866729 | 1.73E-05    | 50      | 0.367879        | 1335   | 176.573 | 1158.43 | phosphopyruvate hydratase                                                |
| ben326_0282_ben1_0286 | 0.00083507  | 1.68E-05    | 49.8148 | 0.459711        | 1422   | 206.582 | 1215.42 | pyruvate kinase                                                          |
| ben468_0293_ben1_0286 | 0.00083507  | 1.68E-05    | 49.8148 | 0.459711        | 1422   | 206.582 | 1215.42 | pyruvate kinase                                                          |
| ben468_0354_ben1_0345 | 0.00599754  | 0.000120464 | 49.7871 | 0.622827        | 795    | 96.1587 | 698.841 | hypothetical protein                                                     |
| ben326_0358_ben1_0359 | 0.00100142  | 2.00E-05    | 50      | 0.367879        | 1239   | 182.654 | 1056.35 | histidyl-tRNA synthetase                                                 |
| ben468_0368_ben1_0359 | 0.00100142  | 2.00E-05    | 50      | 0.367879        | 1239   | 182.654 | 1056.35 | histidyl-tRNA synthetase                                                 |
| ben181_0419_ben1_0403 | 0.00202766  | 4.06E-05    | 50      | 0.469573        | 1083   | 95.4465 | 987.554 | hypothetical protein                                                     |

|                       |             |             |         |           |      |         |         |                                                               |
|-----------------------|-------------|-------------|---------|-----------|------|---------|---------|---------------------------------------------------------------|
| ben181_0451_ben1_0434 | 0.0110326   | 0.00937888  | 1.17632 | 0.481613  | 957  | 127.86  | 829.14  | Na+ ABC transporter ATP-binding protein                       |
| ben326_0439_ben1_0435 | 0.019241    | 0.0012432   | 15.477  | 0.221295  | 495  | 84.0741 | 410.926 | hypothetical protein                                          |
| ben181_0467_ben1_0446 | 0.00269394  | 5.76E-05    | 46.7876 | 0.392371  | 780  | 15.4824 | 764.518 | glycerol-3-phosphate dehydrogenase                            |
| ben326_0449_ben1_0446 | 0.00269394  | 5.76E-05    | 46.7876 | 0.392371  | 780  | 15.4824 | 764.518 | glycerol-3-phosphate dehydrogenase                            |
| ben468_0456_ben1_0446 | 0.00269394  | 5.76E-05    | 46.7876 | 0.392371  | 780  | 15.4824 | 764.518 | glycerol-3-phosphate dehydrogenase                            |
| ben326_0457_ben1_0455 | 0.0381204   | 0.000762407 | 50      | 0.185314  | 183  | 45.6919 | 137.308 | hypothetical protein                                          |
| ben181_0508_ben1_0486 | 0.0106006   | 0.00021994  | 48.1977 | 0.580661  | 324  | 41.5778 | 282.422 | hypothetical protein                                          |
| ben468_0509_ben1_0497 | 0.00447652  | 0.00127331  | 3.51565 | 0.6751    | 1476 | 154.711 | 1321.29 | prolipoprotein                                                |
| ben326_0510_ben1_0508 | 0.000747403 | 1.50E-05    | 49.7073 | 0.329296  | 1512 | 158.578 | 1353.42 | putative RNA polymerase sigma factor RpoD                     |
| ben468_0519_ben1_0508 | 0.000747403 | 1.50E-05    | 49.7073 | 0.329296  | 1512 | 158.578 | 1353.42 | putative RNA polymerase sigma factor RpoD                     |
| ben181_0534_ben1_0509 | 0.00669888  | 0.000139999 | 47.8495 | 0.47924   | 495  | 30.9681 | 464.032 | hypothetical protein                                          |
| ben326_0512_ben1_0510 | 0.00621013  | 0.000127211 | 48.8174 | 0.470936  | 357  | 31.8639 | 325.136 | dinuclear metal center protein, YbgI family                   |
| ben326_0516_ben1_0513 | 0.000264369 | 2.12E-05    | 12.4487 | 0.419387  | 4116 | 335.386 | 3780.61 | putative membrane protein                                     |
| ben181_0549_ben1_0521 | 0.000718034 | 1.44E-05    | 50      | 0.367879  | 1629 | 204.356 | 1424.64 | kinase                                                        |
| ben326_0524_ben1_0521 | 0.000718034 | 1.44E-05    | 50      | 0.367879  | 1629 | 204.356 | 1424.64 | kinase                                                        |
| ben468_0533_ben1_0521 | 0.000718034 | 1.44E-05    | 50      | 0.367879  | 1629 | 204.356 | 1424.64 | kinase                                                        |
| ben181_0554_ben1_0525 | 0.00680606  | 0.000138404 | 49.1754 | 0.636229  | 1008 | 88.463  | 919.537 | phosphate ABC transporter substrate-binding protein           |
| ben181_0557_ben1_0527 | 0.00829834  | 0.000195175 | 42.5175 | 0.533416  | 405  | 39.0266 | 365.973 | phosphate ABC transporter, ATP-binding protein                |
| ben468_0551_ben1_0539 | 0.0029895   | 5.98E-05    | 50      | 0.367879  | 396  | 49.6568 | 346.343 | histidine triad protein                                       |
| ben181_0574_ben1_0543 | 0.0326895   | 0.000746999 | 43.7611 | 0.41464   | 258  | 40.8218 | 217.178 | nitrogen fixation protein NIFU                                |
| ben326_0584_ben1_0579 | 0.00105426  | 2.16E-05    | 48.7671 | 0.367879  | 1041 | 88.9191 | 952.081 | N-acetylglucosamine-6-phosphate deacetylase                   |
| ben326_0589_ben1_0583 | 0.000605038 | 1.21E-05    | 50      | 0.367879  | 1797 | 125.58  | 1671.42 | hypothetical protein                                          |
| ben468_0594_ben1_0583 | 0.000605038 | 1.21E-05    | 50      | 0.367879  | 1797 | 125.58  | 1671.42 | hypothetical protein                                          |
| ben181_0647_ben1_0606 | 0.0192486   | 0.000388611 | 49.5318 | 0.566955  | 237  | 21.2517 | 215.748 | 50S ribosomal protein L21                                     |
| ben181_0684_ben1_0643 | 0.000482539 | 1.68E-05    | 28.7795 | 0.367879  | 2313 | 244.465 | 2068.54 | efflux ABC transporter, permease protein                      |
| ben181_0697_ben1_0657 | 0.00453863  | 0.000286597 | 15.8363 | 0.728593  | 1515 | 198.795 | 1316.2  | molecular chaperone DnaK                                      |
| ben326_0707_ben1_0702 | 0.00453677  | 9.07E-05    | 50      | 0.367879  | 228  | 7.7336  | 220.266 | hypothetical protein                                          |
| ben181_0751_ben1_0706 | 0.00249518  | 8.04E-05    | 31.0436 | 0.527463  | 1746 | 122.404 | 1623.6  | hypothetical protein                                          |
| ben326_0722_ben1_0718 | 0.0205591   | 0.000622319 | 33.0362 | 0.0938763 | 768  | 138.432 | 629.568 | hypothetical protein                                          |
| ben181_0779_ben1_0731 | 0.00734179  | 0.000154336 | 47.57   | 0.587327  | 747  | 60.9031 | 686.097 | chromosome replication initiation/membrane attachment protein |

|                       |             |            |         |          |      |         |         |                                |
|-----------------------|-------------|------------|---------|----------|------|---------|---------|--------------------------------|
| ben181_0790_ben1_0740 | 0.00250534  | 5.27E-05   | 47.533  | 0.367879 | 462  | 56.4436 | 405.556 | ferric uptake regulator        |
| ben326_0748_ben1_0740 | 0.00257345  | 5.34E-05   | 48.2127 | 0.31544  | 462  | 65.8559 | 396.144 | ferric uptake regulator        |
| ben468_0704_ben1_0740 | 0.00257345  | 5.34E-05   | 48.2127 | 0.31544  | 462  | 65.8559 | 396.144 | ferric uptake regulator        |
| ben181_0810_ben1_0760 | 0.000764301 | 1.98E-05   | 38.692  | 0.314637 | 1524 | 220.564 | 1303.44 | putative membrane protein      |
| ben181_0857_ben1_0806 | 0.0118671   | 0.00979536 | 1.2115  | 0.437731 | 636  | 107.787 | 528.213 | hypothetical protein           |
| ben181_0859_ben1_0809 | 0.0014534   | 5.25E-05   | 27.708  | 0.367879 | 759  | 71.3021 | 687.698 | hypothetical protein           |
| ben181_0871_ben1_0818 | 0.00115168  | 2.59E-05   | 44.4888 | 0.367879 | 897  | 23.7889 | 873.211 | RNA pseudouridylate synthase   |
| ben326_0827_ben1_0818 | 0.00164601  | 3.29E-05   | 50      | 0.358574 | 627  | 15.8593 | 611.141 | RNA pseudouridylate synthase   |
| ben468_0784_ben1_0818 | 0.00115168  | 2.59E-05   | 44.4888 | 0.367879 | 897  | 23.7889 | 873.211 | RNA pseudouridylate synthase   |
| ben181_0889_ben1_0837 | 0.0137672   | 0.0113804  | 1.20972 | 0.505062 | 696  | 109.67  | 586.33  | putative membrane protein      |
| ben468_0821_ben1_0854 | 0.000995806 | 1.99E-05   | 50      | 0.367879 | 1188 | 181.427 | 1006.57 | variable surface protein       |
| ben181_0969_ben1_0908 | 0.00126993  | 3.26E-05   | 38.9941 | 0.367879 | 924  | 123.714 | 800.286 | carbamate kinase               |
| ben326_0920_ben1_0908 | 0.00126993  | 3.26E-05   | 38.9941 | 0.367879 | 924  | 123.714 | 800.286 | carbamate kinase               |
| ben468_0877_ben1_0919 | 0.00131582  | 3.44E-05   | 38.297  | 0.316192 | 897  | 126.03  | 770.97  | carbamate kinase               |
| ben181_0973_ben1_0923 | 0.000442141 | 9.16E-06   | 48.2681 | 0.367879 | 2811 | 444.921 | 2366.08 | magnesium-importing ATPase     |
| ben326_0922_ben1_0923 | 0.000437662 | 1.03E-05   | 42.3262 | 0.297891 | 2811 | 534.787 | 2276.21 | magnesium-importing ATPase     |
| ben181_0974_ben1_0924 | 0.001099    | 2.20E-05   | 50      | 0.466904 | 1143 | 179.056 | 963.944 | hypothetical protein           |
| ben326_0923_ben1_0924 | 0.001099    | 2.20E-05   | 50      | 0.466904 | 1143 | 179.056 | 963.944 | hypothetical protein           |
| ben468_0881_ben1_0924 | 0.001099    | 2.20E-05   | 50      | 0.466904 | 1143 | 179.056 | 963.944 | hypothetical protein           |
| ben181_0990_ben1_0929 | 0.000834696 | 2.18E-05   | 38.2639 | 0.367879 | 1392 | 187.979 | 1204.02 | ATP synthase F1, alpha subunit |
| ben181_0992_ben1_0931 | 0.0022449   | 4.49E-05   | 50      | 0.367879 | 543  | 69.7609 | 473.239 | ATP synthase subunit B         |
| ben326_0938_ben1_0931 | 0.0022449   | 4.49E-05   | 50      | 0.367879 | 543  | 69.7609 | 473.239 | ATP synthase subunit B         |
| ben468_0888_ben1_0931 | 0.0022449   | 4.49E-05   | 50      | 0.367879 | 543  | 69.7609 | 473.239 | ATP synthase subunit B         |
| ben468_0900_ben1_0944 | 0.00123523  | 2.47E-05   | 50      | 0.315105 | 942  | 135.135 | 806.865 | hypothetical protein           |
| ben181_1005_ben1_0945 | 0.0035362   | 9.07E-05   | 38.9798 | 0.461656 | 642  | 53.2182 | 588.782 | CTP synthetase                 |
| ben326_0958_ben1_0952 | 0.00081856  | 1.64E-05   | 50      | 0.367879 | 1518 | 259.088 | 1258.91 | amino acid permease            |
| ben468_0909_ben1_0952 | 0.00081856  | 1.64E-05   | 50      | 0.367879 | 1518 | 259.088 | 1258.91 | amino acid permease            |
| ben181_1025_ben1_0966 | 0.00380802  | 7.62E-05   | 50      | 0.367879 | 282  | 13.7509 | 268.249 | hypothetical protein           |
| ben181_1053_ben1_0988 | 0.0026006   | 5.20E-05   | 50      | 0.534318 | 933  | 132.125 | 800.875 | HPr kinase/phosphorylase       |
| ben326_0998_ben1_0988 | 0.0026006   | 5.20E-05   | 50      | 0.534318 | 933  | 132.125 | 800.875 | HPr kinase/phosphorylase       |

|                       |             |             |         |          |      |         |         |                                           |
|-----------------------|-------------|-------------|---------|----------|------|---------|---------|-------------------------------------------|
| ben468_0948_ben1_0988 | 0.0026006   | 5.20E-05    | 50      | 0.534318 | 933  | 132.125 | 800.875 | HPr kinase/phosphorylase                  |
| ben468_0954_ben1_0994 | 0.000876437 | 1.75E-05    | 50      | 0.309644 | 1461 | 231.278 | 1229.72 | hypothetical protein                      |
| ben181_1073_ben1_1008 | 0.000897825 | 1.80E-05    | 50      | 0.321219 | 1305 | 165.521 | 1139.48 | replicative DNA helicase                  |
| ben326_1016_ben1_1008 | 0.000897825 | 1.80E-05    | 50      | 0.321219 | 1305 | 165.521 | 1139.48 | replicative DNA helicase                  |
| ben468_0967_ben1_1008 | 0.000897825 | 1.80E-05    | 50      | 0.321219 | 1305 | 165.521 | 1139.48 | replicative DNA helicase                  |
| ben326_0113_ben1_1044 | 0.0011637   | 2.76E-05    | 42.1422 | 0.367879 | 894  | 32.3395 | 861.66  | glycosyltransferase                       |
| ben326_0114_ben1_1045 | 0.00134998  | 2.70E-05    | 50      | 0.322245 | 870  | 107.921 | 762.079 | nucleotidyl transferase                   |
| ben468_1015_ben1_1059 | 0.00482179  | 0.000110964 | 43.4537 | 0.502362 | 480  | 60.887  | 419.113 | variable surface prolipoprotein           |
| ben326_1048_ben1_1063 | 0.000265658 | 0.000146442 | 1.81409 | 0.367879 | 3855 | 202.251 | 3652.75 | DNA-directed RNA polymerase, beta subunit |
| ben468_1022_ben1_1063 | 0.000265658 | 0.000146442 | 1.81409 | 0.367879 | 3855 | 202.251 | 3652.75 | DNA-directed RNA polymerase, beta subunit |
| ben326_1067_ben1_1082 | 0.000933971 | 1.87E-05    | 50      | 0.367879 | 1191 | 95.4302 | 1095.57 | hypothetical protein                      |
| ben468_1048_ben1_1090 | 0.00493499  | 0.000135552 | 36.4067 | 0.367879 | 237  | 34.3506 | 202.649 | variable prolipoprotein                   |
| ben181_1171_ben1_1102 | 0.0212764   | 0.00154176  | 13.8001 | 0.391784 | 192  | 2.43859 | 189.561 | ribonuclease P (protein C5)               |

---
